# Supplementary material for: A quantitative empirical directing group scale for selectivity in iridium-catalysed hydrogen isotope exchange reactions
Source: Royal Society of Chemistry journal article supplement (doi:10.1039/d0cy01597k), 2020-01-01

- Supplementary Information -

**A quantitative empirical directing group scale for selectivity  
in iridium-catalysed hydrogen isotope exchange reactions**

Daria S. Timofeeva, David M. Lindsay, David J. Nelson\*, William J. Kerr\*

WestCHEM Department of Pure and Applied Chemistry, Thomas Graham Building, 295  
Cathedral Street, Glasgow, G1 1XL, UK

david.nelson@strath.ac.uk

**Table of Contents**

|             |                                                                                                 |      |
|-------------|-------------------------------------------------------------------------------------------------|------|
| <b>1.</b>   | General Experimental Details                                                                    | S2   |
| <b>2.</b>   | Synthesis and Characterisation                                                                  | S4   |
| <b>2.1.</b> | Synthesis of Iridium (I) Complexes                                                              | S4   |
| <b>2.2.</b> | Synthesis of the Substrates                                                                     | S8   |
| <b>3.</b>   | Intermolecular Competition Experiments                                                          | S13  |
| <b>3.1.</b> | General Information                                                                             | S13  |
| <b>3.2.</b> | Effects of the Reaction Conditions on Competition Rate Constants                                | S19  |
| <b>3.3.</b> | Competition Experiments with [(COD)Ir(IMes)PPh <sub>3</sub> ]BArF <sub>24</sub> ( <b>Ir-1</b> ) | S33  |
| <b>3.4.</b> | Competition Experiments with (COD)Ir(IMes)Cl ( <b>Ir-2</b> )                                    | S90  |
| <b>3.5.</b> | Linear Regression Analysis                                                                      | S147 |
| <b>4.</b>   | Intramolecular Competition Experiments                                                          | S151 |
| <b>4.1.</b> | General Information                                                                             | S151 |
| <b>4.2.</b> | Competition Experiments with [(COD)Ir(IMes)PPh <sub>3</sub> ]BArF <sub>24</sub> ( <b>Ir-1</b> ) | S152 |
| <b>4.3.</b> | Competition Experiments with (COD)Ir(IMes)Cl ( <b>Ir-2</b> )                                    | S162 |
| <b>5.</b>   | References                                                                                      | S168 |
| <b>6.</b>   | Copies of NMR Spectra                                                                           | S169 |
| <b>6.1.</b> | <sup>1</sup> H and <sup>13</sup> C NMR of synthesised substrates                                | S169 |
| <b>6.2.</b> | <sup>1</sup> H NMR of non-deuterated commercial substrates                                      | S184 |

# 1. General Experimental Details

## General

For the synthetic procedures, standard Schlenk techniques under an inert gas atmosphere (Ar or N<sub>2</sub>) were used, unless otherwise stated. Materials obtained from commercial sources were used without further purification. All glassware was flame dried and cooled under a stream of nitrogen.

## Materials

Dichloromethane, tetrahydrofuran, diethyl ether and toluene were obtained from a PureSolv SPS-400-5 Solvent Purification System. Ethyl acetate was dried over K<sub>2</sub>CO<sub>3</sub>, then distilled under a nitrogen atmosphere and stored over 3 Å molecular sieves. Dry organic solvents and distilled water used for cross-coupling reactions were additionally degassed by bubbling argon through the solvent for 30 min. For reactions/work-up procedures in air, p.a. grade solvents were used. Petroleum ether refers to alkanes with a boiling point range of 40-60°C.

(1,3-Bis-(2,4,6-trimethylphenyl)imidazolium chloride,<sup>S1</sup> phenylthiazoline,<sup>S2</sup> and 1-methyl-2-phenylimidazole<sup>S3</sup> were synthesised according to literature procedures. 2-Phenylthiazole, 2-phenylpyrimidine, 2-(4-acetyl)phenylpyridine, and 2-(4-cyano)phenylpyridine were prepared by cross-coupling reactions of corresponding phenylboronic acids and heterobromides as described in section 2. 2-(4-Acetyl)phenyloxazoline and 2-(4-(pyridin-2-yl)phenyl)-4,5-dihydrooxazole were obtained from the reaction between corresponding aryl nitriles and amino alcohols catalysed by [Cu(Cl)(IPr)].<sup>S4</sup> Anhydrous Na[BArF<sub>24</sub>] (BArF<sub>24</sub> = tetrakis[3,5-bis(trifluoromethyl)phenyl]borate)) was obtained following Bergman's synthesis,<sup>S5</sup> followed by recrystallising the crude Na[BArF<sub>24</sub>]·x(solvent) prior to drying.<sup>S6</sup> Phosphine/NHC monodentate complex **Ir-1** with the BArF<sub>24</sub> counterion was synthesised from neutral chlorocarbene complex **Ir-2**<sup>S7</sup> in a procedure adapted from that published before for preparation of corresponding complexes with BF<sub>4</sub> and OTf counterions.<sup>S8</sup>

Flash column chromatography was carried out using silica gel (230-400 mesh). Thin layer chromatography (TLC) was performed using Merck silica plates coated with fluorescent indicator and visualised by UV light (254 nm)

## Analysis

*NMR Spectroscopy:* <sup>1</sup>H (400 MHz), <sup>13</sup>C{<sup>1</sup>H} (101 MHz), <sup>11</sup>B (128 MHz) <sup>19</sup>F (376 MHz) and <sup>31</sup>P{<sup>1</sup>H} (162 MHz) NMR spectra were obtained on a Bruker AV3-400 instrument with a liquid nitrogen Prodigy cryoprobe. The chemical shifts (δ) are reported in ppm relative to the residual protonated solvent for <sup>1</sup>H NMR or solvent signal for <sup>13</sup>C{<sup>1</sup>H} NMR (CDCl<sub>3</sub>: δ<sub>H</sub> 7.26 ppm and δ<sub>C</sub> 77.16 ppm; DMSO-*d*<sub>6</sub>: δ<sub>H</sub> 2.50 ppm and δ<sub>C</sub> 39.51 ppm; C<sub>6</sub>D<sub>6</sub>: δ<sub>H</sub> 7.16 ppm; acetone-*d*<sub>6</sub>: δ<sub>H</sub> 2.05 ppm).<sup>S9</sup> Coupling constants (*J*) are reported in Hz and refer to <sup>3</sup>J<sub>H-H</sub> couplings, unless otherwise stated. Multiplicities are expressed with s (singlet), d (doublet), t (triplet), q (quartet), m (multiplet), br (broad signal). If no multiplicity is given for <sup>13</sup>C{<sup>1</sup>H} data, the signal is a singlet. NMR assignments were made using additional 2D NMR experiments where necessary.

*Infrared Spectroscopy:* Infrared (IR) spectra were collected on a Shimadzu IRAffinity-1 Spectrophotometer with only major peaks being reported.

*Elemental analysis* was performed using a Perkin-Elmer CH2400 instrument.

**a) For intermolecular competition experiments**

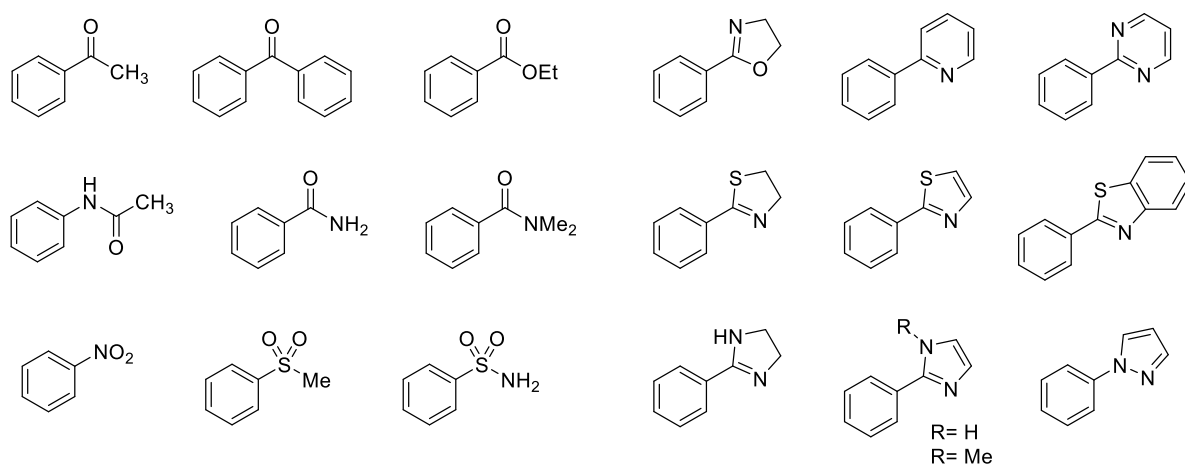

**b) For intramolecular competition experiments**

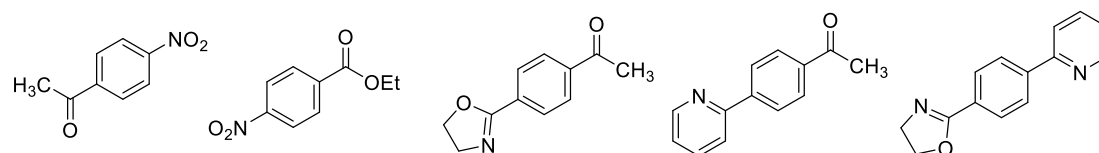

**Figure S1.** Scope of the substrates used in the study

## 2. Synthesis and Characterisation

### 2.1. Synthesis of Iridium (I) Complexes

#### Synthesis of 1,3-Bis-(2,4,6-trimethylphenyl)imidazolium chloride (IMes·HCl)<sup>S1</sup>

*N,N'*-dimesitylethanimine

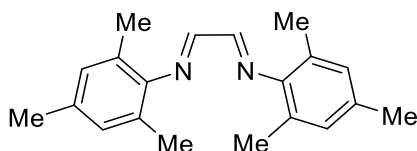

2,4,6-Trimethylaniline (84.2 mL, 0.60 mol, 2.0 equiv.) was dissolved in methanol (200 mL) and cooled to 0 °C, and a solution of 40% glyoxal in water (34.4 mL, 0.30 mol, 1.0 equiv.) with one or two drops of formic acid was added. The solution was warmed to room temperature and stirred for two days. The yellow suspension was filtrated and washed with a minimum volume of methanol and diethyl ether to afford *N,N'*-dimesitylethanimine (78.5 g, 0.27 mol, 90%) as a yellow powder, which was used immediately in the next step.

**<sup>1</sup>H NMR** (400 MHz, CDCl<sub>3</sub>)  $\delta$  = 8.11 (s, 2H, CH=N), 6.92 (s, 4H, ArH), 2.30 (s, 6H, *p*-CH<sub>3</sub>), 2.17 (s, 12H, *o*-CH<sub>3</sub>).

**<sup>13</sup>C{<sup>1</sup>H} NMR** (101 MHz, CDCl<sub>3</sub>)  $\delta$  = 163.6, 147.6, 134.4, 129.1, 126.7, 20.9, 18.3.

NMR data are consistent with the literature.<sup>S10</sup>

#### 1,3-Bis-(2,4,6-trimethylphenyl)imidazolium chloride (IMes·HCl)<sup>S1</sup>

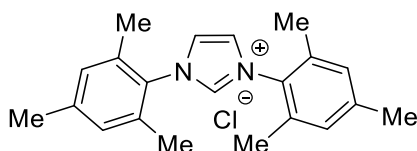

Paraformaldehyde (8.05g, 0.27 mol, 1.0 equiv.) was suspended in a solution of 4M hydrochloric acid in dioxane (94 mL, 0.38 mol, 1.4 equiv.) and stirred until complete dissolution of the white solid. THF (300 mL) was added, followed by the slow addition of *N,N'*-dimesitylethanimine (78.5 g, 0.27 mol, 1.0 equiv.). The resulting solution was stirred at 40 °C for 2 days. The suspension was cooled to room temperature and the white precipitate was collected by filtration, and washed with THF (100 mL) and diethyl ether (100 mL) to afford the crude product, which was recrystallized from a DCM/Et<sub>2</sub>O mixture to afford 1,3-bis-(2,4,6-trimethylphenyl)imidazolium chloride (36.6 g, 0.11 mol, 40%) as a white powder.

**<sup>1</sup>H NMR** (400 MHz, CDCl<sub>3</sub>)  $\delta$  = 10.64 (s, 1H, N-CH=N), 7.61 (d, *J* = 0.9 Hz, 2H), 7.02 (s, 4H, Ar), 2.33 (s, 6H, *p*-CH<sub>3</sub>), 2.17 (s, 12H, *o*-CH<sub>3</sub>).

**<sup>13</sup>C{<sup>1</sup>H} NMR** (101 MHz, CDCl<sub>3</sub>)  $\delta$  = 141.4, 139.2, 134.2, 130.7, 130.0, 124.8, 21.2, 17.7.

NMR data are consistent with the literature.<sup>S1</sup>



**Synthesis of Chloro( $\eta^4$ -cycloocta-1,5-diene)(1,3-dimesitylimidazoline-2-ylidene)iridium(I) [Ir(COD)(IMes)Cl]<sup>S7</sup>**

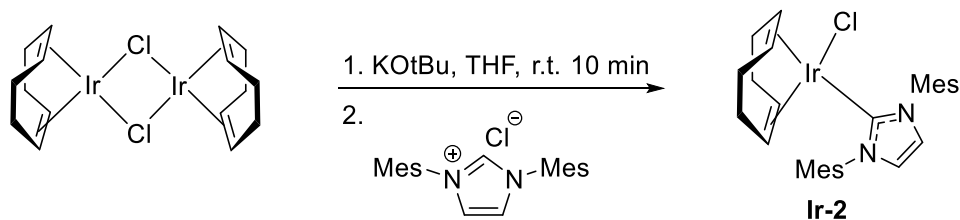

Bis(1,5-cyclooctadiene)diiridium(I) dichloride (500 mg, 0.75 mmol, 1 equiv.) and potassium *tert*-butoxide (167 mg, 1.50 mmol, 2 equiv.) were added to a flame-dried Schlenk tube under argon and stirred under vacuum for 5 min. THF (12.5 mL) was added and the mixture was stirred under argon for 10 min. IMes·HCl (508 mg, 1.50 mmol, 2 equiv.) was then added and the resulting reaction mixture was stirred for 4 h. The solvent was removed *in vacuo*, and column chromatography (50% ethyl acetate in petroleum ether) afforded the title compound (730 mg, 1.14 mmol, 76 %) as yellow solid. The isolated catalyst was dried in a vacuum oven (40 °C, 1 mbar) for 24 h before use. This process was repeated batch-wise to obtain a of the quantity of **Ir-2** necessary for all competition studies and synthesis of **Ir-1** catalyst.

**m.p.** > 190 °C (decomposition)

**<sup>1</sup>H NMR** (400 MHz, CDCl<sub>3</sub>)  $\delta$  = 7.04 – 6.96 (m, 4H, Ar-H), 6.95 (s, 2H, NCH=CHN), 4.19 – 4.12 (m, 2H, COD CH), 3.01 – 2.94 (m, 2H, COD CH), 2.36 (s, 12H, *o*-CH<sub>3</sub>Ar), 2.16 (s, 6H, *p*-CH<sub>3</sub>Ar), 1.78 – 1.59 (m, 4H, COD CH<sub>2</sub>), 1.39 – 1.20 (m, 4H, COD CH<sub>2</sub>).

**<sup>13</sup>C{<sup>1</sup>H} NMR** (101 MHz, CDCl<sub>3</sub>)  $\delta$  = 180.9, 138.8, 137.5, 136.2, 134.5, 129.7, 128.3, 123.4, 82.7, 51.6, 33.6, 29.1, 21.3, 19.8, 18.4.

NMR data are consistent with the literature.<sup>S7</sup>

**Sodium tetrakis[3,5-bis(trifluoromethyl)phenyl]borate** [Na(BArF<sub>24</sub>)]<sup>S5,S6</sup>

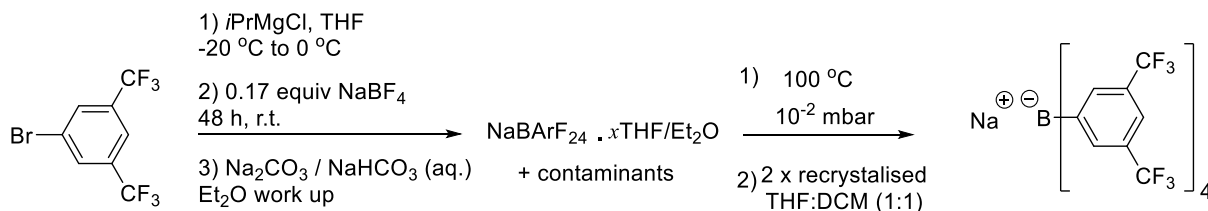

A 2.0 M solution of *i*-PrMgCl in THF (100 mL, 0.20 mol, 6.6 equiv.) was added dropwise over 45 min to a stirred solution of 1-bromo-3,5-bistrifluoromethylbenzene (30 mL, 0.17 mol, 5.8 equiv.) in THF (150 mL) chilled to -20 °C. After the reaction was allowed to warm from -20 °C to 0 °C over 1 h, NaBF<sub>4</sub> (3.3 g, 0.03 mol, 1.0 equiv.) was quickly added as a solid under a stream of N<sub>2</sub>. The mixture then stirred for 48 h at 23 °C (under N<sub>2</sub>). All work-up and purification procedures were then carried out under air. The contents of the flask were poured into a solution of Na<sub>2</sub>CO<sub>3</sub> (44 g) and NaHCO<sub>3</sub> (22 g) in water (600 mL). This mixture was stirred vigorously for 1 h and then extracted with diethyl ether (4 × 200 mL). The combined organic layers were washed with brine and dried over anhydrous Na<sub>2</sub>SO<sub>4</sub>. After filtration of the mixture and rotary evaporation of the filtrate, the crude Na[BArF<sub>24</sub>]·xTHF/Et<sub>2</sub>O was dried at 100 °C/10<sup>-2</sup> mbar for 10 h to yield a tacky brown/yellow solid. Dissolving the resulting oily crude material in a 1:1 mixture of dichloromethane and tetrahydrofuran (30 mL) and cooling the mixture at -23 °C for 48 h yielded an off-white crystalline solid, which was then recrystallised again under the same conditions. Anhydrous Na[BArF<sub>24</sub>]·THF (12.7 g, 0.014 mmol, 48%) was obtained as white solid by drying the resulting crystalline solid under vacuum (< 10<sup>-2</sup> mbar) for 10 h. Anhydrous Na[BArF<sub>24</sub>] was stored under an atmosphere of argon.

<sup>1</sup>H NMR (400 MHz, acetone-*d*<sub>6</sub>) δ = 7.79 (br, 8H, *ortho*-Ar-H), 7.67 (br, 4H, *para*-Ar-H).

<sup>13</sup>C{<sup>1</sup>H} NMR (101 MHz, DMSO-*d*<sub>6</sub>) δ = 161.0 (q, <sup>1</sup>J<sub>C-B</sub> = 49.9 Hz, *ipso*-C), 134.0 (br, *ortho*-C), 128.5 (qq, <sup>3</sup>J<sub>C-B</sub> = 2.8 Hz, <sup>2</sup>J<sub>C-F</sub> = 32.2 Hz, *meta*-C), 124.0 (q, <sup>1</sup>J<sub>C-F</sub> = 272 Hz, CF<sub>3</sub>), 117.5 (br, *para*-C).

<sup>11</sup>B NMR (128 MHz, acetone-*d*<sub>6</sub>) δ = -6.65.

<sup>19</sup>F NMR (376 MHz, acetone-*d*<sub>6</sub>) δ = -63.3.

NMR data are consistent with the literature.<sup>S5</sup>

**Synthesis of  $\eta^4$ -cycloocta-1,5-diene(1,3-dimesitylimidazoline-2-ylidene)(triphenylphosphine)iridium(I)tetrakis [(3,5-rifluoromethylphenyl)]borate, [(COD)Ir(PPh<sub>3</sub>)(IMes)]BArF<sub>24</sub><sup>S8</sup>**

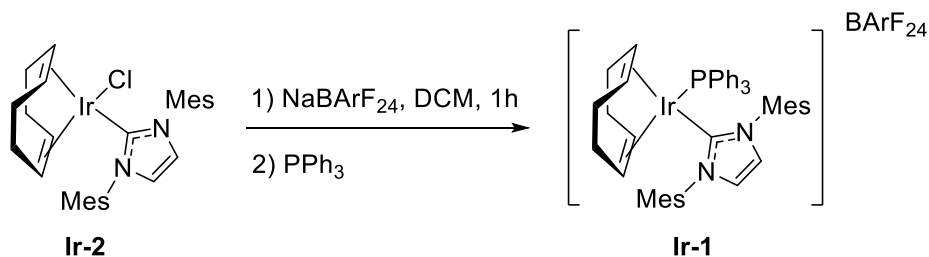

[Ir(COD)Cl(IMes)], **Ir-2**, (200 mg, 0.31 mmol, 1.0 equiv.) and NaBArF<sub>24</sub> (275 mg, 0.31 mmol, 1.0 equiv.) were added to a flame-dried Schlenk tube under an argon atmosphere. The solids were then dissolved in anhydrous DCM (10 mL) and stirred for 30 min. The triphenylphosphine ligand (82 mg, 0.31 mmol, 1.0 equiv.) was then added slowly, initiating an orange to red colour change. After a further 30 min stirring, the reaction mixture was filtered through celite and concentrated *in vacuo*, resulting in a red oil. This residue was purified by column chromatography (50% DCM in petroleum ether) to afford the title compound as a red crystalline solid (365 mg, 0.21 mmol, 68 %). The isolated catalyst was dried in a vacuum oven (40 °C, 1 mbar) for 24 h before use. This process was repeated batch wise to obtain the quantities of **Ir-1** necessary for all competition studies.

**m.p.:** >150 °C (decomposition)

**<sup>1</sup>H NMR** (400 MHz, CDCl<sub>3</sub>)  $\delta$  = 7.73 – 7.69 (m, 8H, Ar- BArF<sub>24</sub>), 7.51 (br, 4H, Ar-BArF<sub>24</sub>), 7.45 – 7.39 (m, 3H, Ar-H), 7.31 – 7.24 (m, 8H, Ar-H and NCH=CHN), 7.15 – 7.07 (m, 6H, Ar-H), 7.02 (s, 2H, Ar-H), 6.66 (s, 2H, Ar-H), 4.39 – 4.32 (m, 2H, COD-CH), 3.38 – 3.31 (m, 2H, COD-CH), 2.34 (s, 6H, Ar-CH<sub>3</sub>), 2.08 (s, 6H, Ar-CH<sub>3</sub>), 1.75 (s, 6H, Ar-CH<sub>3</sub>), 1.68 – 1.45 (m, 6H, COD-CH<sub>2</sub>), 1.31 – 1.24 (m, 2H, COD-CH<sub>2</sub>).

**<sup>13</sup>C{<sup>1</sup>H} NMR** (101 MHz, CDCl<sub>3</sub>)  $\delta$  = 178.1 (d, <sup>2</sup>J<sub>C-P</sub> = 8.4 Hz), 161.9 (q, <sup>1</sup>J<sub>C-B</sub> = 49.9 Hz), 140.2, 135.6, 135.2, 134.9, 134.8, 132.3, 132.2, 131.4, 131.3, 130.9, 130.6, 129.9, 129.5, 129.2, 128.9, 128.7, 128.6, 126.2, 124.7 (q, <sup>1</sup>J<sub>C-F</sub> = 272 Hz), 117.6, 80.6, 80.5, 78.7, 31.9, 30.3, 30.2, 21.2, 20.9, 19.0.

**<sup>11</sup>B NMR** (128 MHz, CDCl<sub>3</sub>)  $\delta$  = - 6.64.

**<sup>19</sup>F NMR** (376 MHz, CDCl<sub>3</sub>)  $\delta$  = - 62.4.

**<sup>31</sup>P{<sup>1</sup>H} NMR** (162 MHz, CDCl<sub>3</sub>)  $\delta$  = 16.4.

NMR data are consistent with the literature.<sup>S8</sup>

## 2.2. Synthesis of Substrates

### 2-Phenylthiazoline<sup>S2</sup>

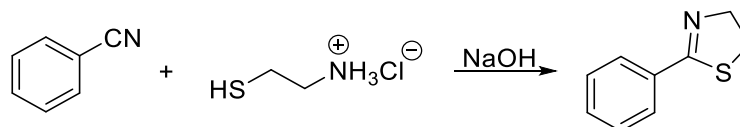

In air, a 10 mL round-bottom flask was charged with benzonitrile (0.50 g, 4.85 mmol), cysteamine hydrochloride (0.83 g, 7.28 mmol) and NaOH (40 mg, 0.97 mmol). The reaction was stirred at 80 °C for 2 hours under solvent-free conditions. The crude product was dissolved in ethyl acetate (2 mL) and water (10 mL) was added. The layers were separated and the aqueous layer was then extracted with ethyl acetate (3 × 10 mL). The combined organic layers were dried over MgSO<sub>4</sub>, filtered and dried under vacuum to give the title compound (0.76 g, 4.66 mmol, 96%).

**<sup>1</sup>H NMR** (400 MHz, CDCl<sub>3</sub>) δ = 7.88 – 7.80 (m, 2H, Ar-H), 7.48 – 7.37 (m, 3H, Ar-H), 4.46 (t, *J* = 8.3 Hz, 2H, CH<sub>2</sub>), 3.41 (t, *J* = 8.3 Hz, 2H, CH<sub>2</sub>).

**<sup>13</sup>C{<sup>1</sup>H} NMR** (101 MHz, CDCl<sub>3</sub>) δ = 169.0, 133.2, 131.4, 128.6, 128.5, 65.1, 33.7.

NMR data are consistent with the literature.<sup>S2</sup>

### 2-Phenylthiazole

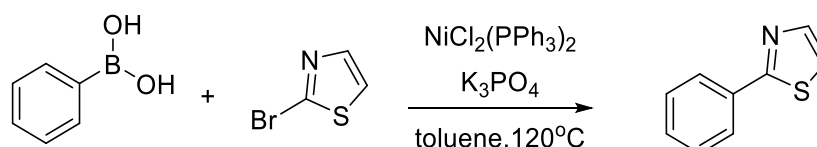

Phenylboronic acid (762 mg, 6.25 mmol, 1.25 equiv.), [NiCl<sub>2</sub>(PPh<sub>3</sub>)<sub>2</sub>] (262 mg, 0.40 mmol, 8 mol%), K<sub>3</sub>PO<sub>4</sub> (1.59 g, 7.50 mmol, 1.5 equiv.) were added to a flame-dried two-necked round-bottom flask equipped with a stirrer bar and condenser. The system was evacuated for 5 minutes and filled with N<sub>2</sub>, then dry toluene (10 mL) and 2-bromothiazole (820 mg, 5.0 mmol, 1 equiv.) were added. The reaction mixture was heated at reflux overnight (16 h) and was then cooled to room temperature before water (50 mL) and Et<sub>2</sub>O (50 mL) were added. The aqueous layer was extracted with diethyl ether (3 × 50 mL). The combined organic layers were dried over MgSO<sub>4</sub>, filtered, and the solvent was removed under vacuum. The residue was purified by column chromatography (10 % Et<sub>2</sub>O in hexane) to afford the title compound as a yellow oil (163 mg, 1.01 mmol, 20 %).

**<sup>1</sup>H NMR** (400 MHz, CDCl<sub>3</sub>) δ = 8.01 – 7.94 (m, 2H, Ar-H), 7.87 (d, *J* = 3.3 Hz, 1H, Ar-H), 7.48 – 7.41 (m, 3H, Ar-H), 7.33 (d, *J* = 3.3 Hz, 1H, CH).

**<sup>13</sup>C{<sup>1</sup>H} NMR** (101 MHz, CDCl<sub>3</sub>) δ = 168.6, 143.8, 133.8, 130.1, 129.1, 126.7, 118.9.

NMR data are consistent with the literature.<sup>S11</sup>

### 1-Methyl-2-phenylimidazole<sup>S3</sup>

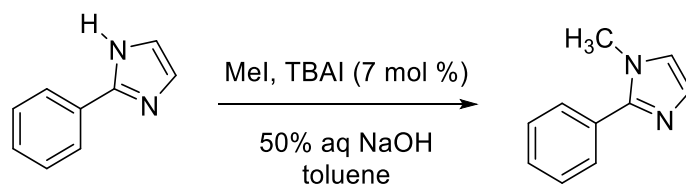

Methyl iodide (0.48 mL, 7.6 mmol) was added to the biphasic mixture obtained from 2-phenylimidazole (1.0 g, 6.9 mmol), tetra-*n*-butylammonium iodide (0.19 g, 0.51 mmol), 50% aqueous NaOH (30 mL) and toluene (30 mL). After stirring for 15 min at room temperature, the mixture was diluted with toluene (30 mL) and H<sub>2</sub>O (30 mL). The organic phase was separated, dried (MgSO<sub>4</sub>), and concentrated under reduced pressure to give pale yellow oil (1.03 g, 6.51 mmol, 97 %).

**<sup>1</sup>H NMR** (400 MHz, CDCl<sub>3</sub>)  $\delta$  = 7.65 – 7.60 (m, 2H, Ar-H), 7.48 – 7.37 (m, 3H, Ar-H), 7.12 (d, *J* = 1.2 Hz, 1H, CH), 6.97 (d, *J* = 1.2 Hz, 1H, CH), 3.19 (s, 3H, CH<sub>3</sub>).

**<sup>13</sup>C{<sup>1</sup>H} NMR** (101 MHz, CDCl<sub>3</sub>)  $\delta$  = 147.9, 130.5, 128.8, 128.8, 128.7, 128.3, 122.5, 34.6.

NMR data are consistent with the literature.<sup>S12</sup>

### 2-Phenylpyrimidine

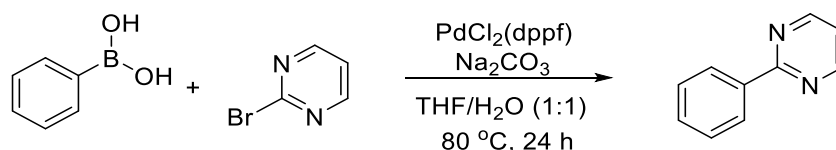

A flame dried 50 mL round-bottom flask was charged with [PdCl<sub>2</sub>(dppf)] (40 mg, 0.05 mmol), phenylboronic acid (611 mg, 5.0 mmol), Na<sub>2</sub>CO<sub>3</sub> (1.23 g, 12.0 mmol) and suspended in premixed 1:1 solution of THF/H<sub>2</sub>O (60 mL). Subsequently, 2-bromopyrimidine (646 mg, 4.0 mmol) was added and the reaction mixture was stirred at 80 °C overnight (16 h), and then cooled to room temperature. H<sub>2</sub>O (30 mL) was added to the reaction mixture. The aqueous layer was extracted with diethyl ether (3 × 50 mL). The combined organic layers were dried over MgSO<sub>4</sub>, filtered, and the solvent was removed under vacuum. The residue was purified by column chromatography (20 % Et<sub>2</sub>O in hexane) to afford the title compound as a yellow oil (331 mg, 2.12 mmol, 53 %).

**<sup>1</sup>H NMR** (400 MHz, CDCl<sub>3</sub>)  $\delta$  = 8.81 (d, *J* = 4.9 Hz, 2H, Ar-H), 8.49 – 8.42 (m, 2H, Ar-H), 7.52 – 7.47 (m, 3H, Ar-H), 7.18 (t, *J* = 4.8 Hz, 1H, Ar-H).

**<sup>13</sup>C{<sup>1</sup>H} NMR** (101 MHz, CDCl<sub>3</sub>)  $\delta$  = 164.9, 157.4, 137.7, 130.9, 128.7, 128.3, 119.2.

NMR data are consistent with the literature.<sup>S11</sup>

### 2-(4-Acetyl)phenylpyridine

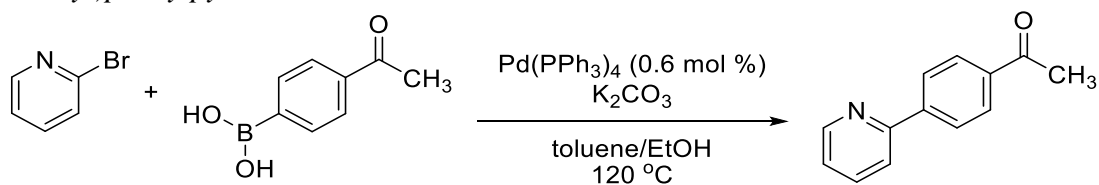

A flame dried 50mL round-bottom flask was charged with  $[\text{Pd(PPh}_3)_4]$  (21 mg, 0.018 mmol), 4-acetylphenylboronic acid (738 mg, 4.50 mmol), potassium carbonate (1.21 g, 9.0 mmol). The solids were suspended in premixed toluene/ethanol (3:2) (30 mL). Subsequently, 2-bromopyridine (0.28 mL, 3.0 mmol) was added and the reaction mixture was stirred for 24 h at  $120^\circ\text{C}$  before being allowed to cool to room temperature. Water (100 mL) was added, the layers were separated, and the aqueous layer was extracted with diethyl ether (3 x 50 mL). The combined organic layers were dried over  $\text{MgSO}_4$ , filtered, and then the solvent was removed under vacuum yielding the crude yellow solid. The crude product was dissolved in DCM (5 mL) and passed through a short pad of silica which was then washed with further DCM. The solvent was evaporated, and the residue was crystallised from a DCM/pentane mixture to afford the product as a white solid (517 mg, 2.62 mmol, 87%).

**$^1\text{H}$  NMR** (400 MHz,  $\text{CDCl}_3$ )  $\delta$  = 8.77 – 8.71 (m, 1H, Ar-H), 8.13 – 8.09 (m, 2H, Ar-H), 8.09 – 8.04 (m, 2H, Ar-H), 7.82 – 7.78 (m, 2H, Ar-H), 7.33 – 7.27 (m, 1H, Ar-H), 2.65 (s, 3H,  $\text{CH}_3$ ).

**$^{13}\text{C}\{^1\text{H}\}$  NMR** (101 MHz,  $\text{CDCl}_3$ )  $\delta$  = 198.0, 150.1, 137.1, 129.0, 127.2, 123.1, 121.2, 26.9.

NMR data are consistent with the literature.<sup>S13</sup>

### 2-(4-Acetyl)phenyloxazoline<sup>S5</sup>

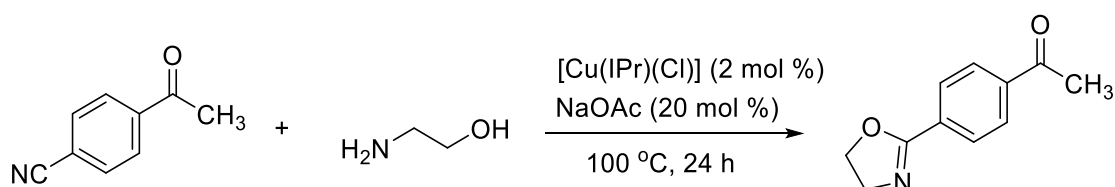

A flame dried vial was charged with  $[\text{Cu(IPr)(Cl)}]$  (10 mg, 0.02 mmol), 4-acetylbenzonitrile (145 mg, 1.0 mmol) and  $\text{NaOAc}$  (16 mg, 0.2 mmol), and evacuated and backfilled with  $\text{N}_2$ . Ethanolamine (0.24 mL, 4.0 mmol) was added and the reaction was stirred at  $100^\circ\text{C}$  for 16 h under solvent-free conditions. The reaction mixture was cooled to room temperature, dissolved in DCM and passed through a short pad of silica with DCM as the eluent. The solvent was removed under vacuum yielding a pale yellow solid (60 mg, 0.32 mmol, 32 %).

**$^1\text{H}$  NMR** (400 MHz,  $\text{CDCl}_3$ )  $\delta$  = 8.06 – 7.97 (m, 4H, Ar-H), 4.47 (t,  $J$  = 9.6, 2H,  $\text{CH}_2$ ), 4.10 (t,  $J$  = 9.6, 2H,  $\text{CH}_2$ ), 2.63 (s, 3H,  $\text{CH}_3$ ).

**$^{13}\text{C}\{^1\text{H}\}$  NMR** (101 MHz,  $\text{CDCl}_3$ )  $\delta$  = 197.7, 139.1, 132.0, 128.5, 128.4, 68.0, 55.3, 26.9.

NMR data are consistent with the literature.<sup>S14</sup>

## 2-(4-Cyano)phenylpyridine

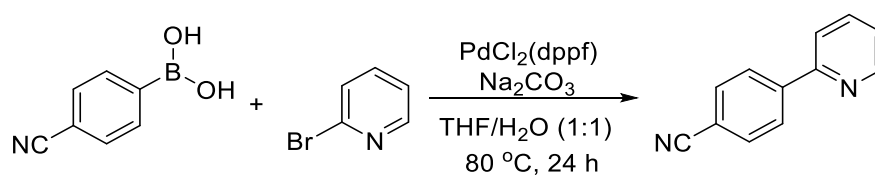

A flame dried 50 mL round-bottom flask was charged with  $[\text{PdCl}_2(\text{dppf})]$  (31 mg, 0.03 mmol), 4-cyanophenylboronic acid (856 mg, 5.83 mmol),  $\text{Na}_2\text{CO}_3$  (1.30 g, 12.0 mmol). The solids were suspended in premixed THF/ $\text{H}_2\text{O}$  (1:1) (40 mL). Subsequently, 2-bromopyridine (0.38 mL, 4.0 mmol) was added, the reaction mixture was stirred at 80 °C for 16 h and then cooled to room temperature.  $\text{H}_2\text{O}$  (30 mL) was added to the reaction mixture, the layers were separated, and the aqueous layer was extracted with EtOAc ( $2 \times 30$  mL). The combined organic solution was dried over  $\text{MgSO}_4$ . The solvent was removed under reduced pressure, and the residue was purified by recrystallisation from a DCM/pentane mixture to afford the title compound as yellow solid (554 mg, 3.07 mmol, 77%).

$^1\text{H}$  NMR (400 MHz,  $\text{CDCl}_3$ )  $\delta$  = 8.75 – 8.67 (m, 1H), 8.12 – 8.07 (m, 2H), 7.82 – 7.72 (m, 4H), 7.33 – 7.27 (m, 1H).

$^{13}\text{C}\{^1\text{H}\}$  NMR (101 MHz,  $\text{CDCl}_3$ )  $\delta$  = 155.2, 150.1, 143.5, 137.2, 132.6, 127.5, 123.4, 121.1, 118.9, 112.5.

NMR data are consistent with the literature.<sup>S15</sup>

## 2-(4-(Pyridin-2-yl)phenyl)-4,5-dihydrooxazole<sup>S4</sup>

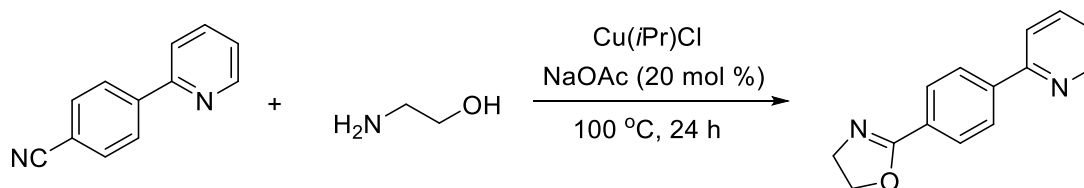

A flame dried vial was charged with  $[\text{Cu}(\text{Cl})(\text{iPr})]$  (135 mg, 0.27 mmol), 2-(4-cyano)phenylpyridine (500 mg, 2.77 mmol) and NaOAc (114 mg, 1.39 mmol), and evacuated and backfilled with  $\text{N}_2$ . Ethanolamine (0.34 mL, 4.0 mmol) was added and the reaction was stirred at 100 °C for 16 h under solvent-free conditions. The reaction mixture was cooled to room temperature, dissolved in DCM and transferred to a separating funnel containing brine (200 mL). The product was extracted with DCM ( $2 \times 50$  mL) and dried over  $\text{MgSO}_4$ , filtered, and the solvent was removed under vacuum. The residue was purified by column chromatography (70 % EtOAc in hexane) to afford the title compound as pale pink solid (248 mg, 1.10 mmol, 40 %).

**m.p.:** 120-125 °C

**<sup>1</sup>H NMR** (400 MHz, CDCl<sub>3</sub>)  $\delta$  = 8.76 – 8.68 (m, 1H), 8.11 – 8.01 (m, 4H, Ar-H), 7.81 – 7.74 (m, 2H), 7.30 – 7.23 (m, 1H), 4.46 (t,  $J$  = 9.5, 2H, CH<sub>2</sub>), 4.09 (t,  $J$  = 9.5, 2H, CH<sub>2</sub>).

**<sup>13</sup>C {<sup>1</sup>H} NMR** (101 MHz, CDCl<sub>3</sub>)  $\delta$  = 164.5, 156.5, 149.9, 142.0, 136.9, 128.7, 128.2, 126.9, 122.7, 120.9, 67.7, 55.1.

**Anal.** Calculated for C<sub>14</sub>H<sub>12</sub>N<sub>2</sub>O: C, 74.98; H, 5.39; N, 12.49. Found: C, 74.28; H, 5.35; N, 12.34.

**FTIR (neat):** 3286, 3047, 2970, 2931, 2990, 2877, 1642, 1572, 1465, 1256, 1071, 1016, 940, 862, 785, 731, 699, 615 cm<sup>-1</sup>.



### 3. Intermolecular Competition Experiments

#### 3.1. General Information

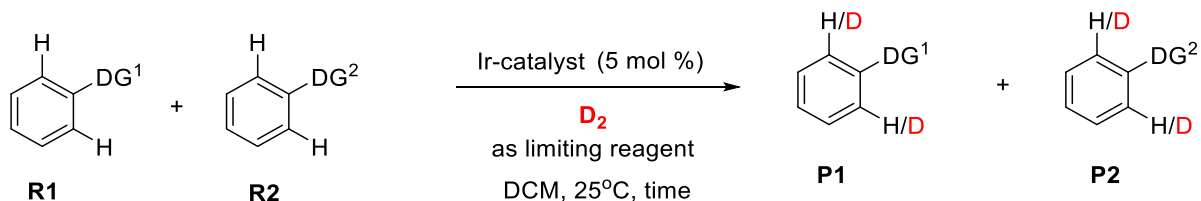

#### Reaction conditions

The relative rates of hydrogen-deuterium exchange reactions have been determined by competition experiments, where equimolar quantities of each of the two substrates bearing different DGs and catalytic amounts of iridium complexes were treated with a limiting amount of  $D_2$  in DCM at 25°C. As a limiting amount of  $D_2$  gas should be used to avoid full conversion of the substrates, its volume was controlled by adding the required amount of solvent.

The volume of 0.10 mmol of the  $D_2$  gas can be calculated according to the ideal gas law (eq. S-1).

$$PV = nRT \quad (S-1)$$

$$n_{(\max)} = 0.10 \text{ mmol}$$

$$T = 298 \text{ K (25 } ^\circ\text{C)}$$

$$R = 0.0821 \text{ L}\cdot\text{atm}\cdot\text{K}^{-1}\cdot\text{mol}^{-1}$$

$$P = 1 \text{ atm}$$

$$V_{(\max)} = nRT/P = 0.10 \times 0.0821 \times 298 / 1 = 2.45 \text{ mL}$$

As the volume of J. Young Schlenk flasks (Figure S2) used for the competition experiments is approximately 8 mL, the use of 6.0 mL of the solvent will lead to less than 1 equivalent of deuterium gas. None of the substrates in the study undergo complete deuteration under these conditions, which are quite different for those used in most HIE experiments where complete deuteration at one site is desired.

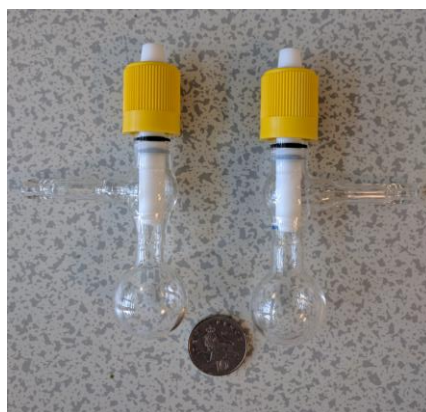

**Figure S2.** The J. Young Schlenk flasks used for competition experiments.

## General Procedure (GP1)

The two substrates of interest (0.10 mmol each) were added to one J. Young Schlenk flask, along with the catalyst of choice (0.005 mmol, unless otherwise noted) in air. DCM (6 mL) was added in such a way to rinse the inner walls of the flask. The flask was then sealed (with the gas inlet left open) under air before being cooled in a dry ice–acetone bath. The flask was evacuated and flushed with deuterium three times *via* a balloon. The gas inlet was then closed with fast thread tap, creating a sealed atmosphere of deuterium. After sealing the flask, it was placed in the thermostated water bath, and the reaction timer was started. The reaction mixture was stirred at 25 °C (1 h for catalyst **Ir-1** and 16 h for catalyst **Ir-2**) before the removal of the excess deuterium and the opening of the flask to air. The reaction mixture was quenched with few drops of MeCN and transferred to a single necked flask together with washings (DCM) before removing the solvent under reduced pressure. For NH-containing substrates (benzamide, benzenesulfonamide, acetanilide, phenylimidazol(in)e) the residue was directly analysed by <sup>1</sup>H NMR. For other substrates, the residue was dissolved in a small portion of 1:1 mixture of petroleum ether and diethyl ether (or EtOAc) and passed through a short plug of silica, eluting with a 1:1 mixture of petroleum ether and diethyl ether (or EtOAc) (3 × 2 mL). The solvent was evaporated again under reduced pressure and the residue was analysed by <sup>1</sup>H NMR.

NMR spectrometer parameters are as follows: the relaxation delay was set to 20 s and the number of scans to four or higher when needed. After careful phasing and baseline correction, the integration of the signals was carried out manually.

## Determination of Competition Rate Constants

The level of deuterium incorporation in the substrates was determined from the obtained  $^1\text{H}$  NMR spectra (eq. S-2). The integrals were calibrated against a peak corresponding to a position which does not undergo labelling. In addition, the calibration signal was chosen to have as little overlap as possible with other peaks.

$$\%D = 100 - \left( \frac{\text{residual integral}}{\text{number of labelling sites}} \times 100 \% \right) \quad (\text{S-2})$$

Based on the ratio between the initial and remaining concentrations of non-deuterated substrates **R**, the competition constants  $\kappa$  were determined (eq. S-3).

$$\kappa = \frac{k_1}{k_2} = \frac{\log ([\mathbf{R1}]_0 / [\mathbf{R1}]_t)}{\log ([\mathbf{R2}]_0 / [\mathbf{R2}]_t)} \quad (\text{S-3})$$

Initial concentrations of the substrates are defined by mass balance (eq. S-4).

$$[\mathbf{R}]_0 = [\mathbf{R}]_t + [\mathbf{P}]_t \quad (\text{S-4})$$

The relative concentrations  $[\mathbf{R}]_0$  and  $[\mathbf{R}]_t$  were derived using equation (S-5) from the residual integral  $I_{\text{R}(t)}$  of the peak corresponding to H/D positions, and the integral  $I_{\text{R}(0)}$  of the peak used for calibration, which corresponds to both remaining starting material and deuterated product.

$$\frac{[\mathbf{R}]_0}{[\mathbf{R}]_t} = \frac{I_{\text{R}(0)} / N}{I_{\text{R}(t)} / N} \quad (\text{S-5})$$

where N is the number of protons contributing to the corresponding peak.

Each combination was analysed three times, and the competition constants are the average of all runs. Standard error of the mean was determined for each averaged competition constant and are summarised in Tables S42-43).

The tables given below for each competition experiment (Table S1 to Table S41) summarize the amounts of the reagents used, integrals from the NMR spectra (Figures S3-S175) used to calculate the relative concentrations of substrates and the values of the competition constants  $\kappa$ .

*Spectral details for unlabelled substrates used in intermolecular competition studies*

**Acetophenone**

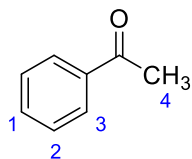

**<sup>1</sup>H NMR** (400 MHz, CDCl<sub>3</sub>) δ = 7.99 – 7.93 (m, 2H, H-3), 7.60 – 7.53 (m, 1H, H-1), 7.51 – 7.42 (m, 2H, H-2), 2.61 (s, 3H, H-4).

Incorporation expected at δ 7.99 – 7.93 ppm (H-3)

Determined against integral at δ 2.61 ppm (H-4)

**<sup>1</sup>H NMR** (400 MHz, DMSO-*d*<sub>6</sub>) δ = 7.98 – 7.94 (m, 2H, H-1), 7.67 – 7.61 (m, 1H, H-3), 7.55 – 7.50 (m, 2H, H-2), 2.58 (s, 3H, H-4).

Incorporation expected at δ 7.98 – 7.96 ppm (H-3)

Determined against integral at δ 2.58 ppm (H-4)

**Benzophenone**

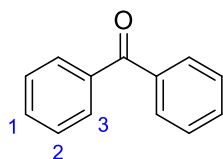

**<sup>1</sup>H NMR** (400 MHz, CDCl<sub>3</sub>) δ = 7.84 – 7.78 (m, 4H, H-3), 7.63 – 7.53 (m, 2H, H-1), 7.52 – 7.45 (m, 4H, H-2).

Incorporation expected at δ 7.84 – 7.78 ppm (H-3)

Determined against integral at δ 7.63 – 7.53 ppm (H-1)

**Benzamide**

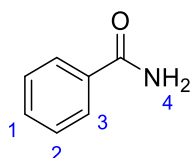

**<sup>1</sup>H NMR** (400 MHz, CDCl<sub>3</sub>) δ = 7.86 – 7.77 (m, 2H, H-3), 7.57 – 7.48 (m, 1H, H-1), 7.48 – 7.39 (m, 2H, H-2), 6.24 (bs, 2H, H-4)

Incorporation expected at δ 7.86 – 7.77 ppm (H-3)

Determined against integral at δ 7.48 – 7.39 ppm (H-2)

**<sup>1</sup>H NMR** (400 MHz, DMSO-*d*<sub>6</sub>) δ = 7.96 (bs, 1H, H-4), 7.90 – 7.85 (m, 2H, H-3), 7.54 – 7.48 (m, 1H, H-1), 7.48 – 7.41 (m, 2H, H-2), 7.35 (s, 1H, H-4)

Incorporation expected at δ 7.90 – 7.85 ppm (H-3)

Determined against integral at δ 7.48 – 7.41 ppm (H-2)

***N,N*-Dimethylbenzamide**

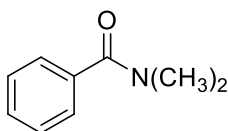

**<sup>1</sup>H NMR** (400 MHz, CDCl<sub>3</sub>) δ = 7.42 – 7.36 (m, 5H, Ar-H), 3.17 – 2.88 (m, 6H, 2 × CH<sub>3</sub>).

Incorporation expected at δ 7.43 – 7.36 ppm

Determined against integral at δ 3.17 – 2.88 ppm

**Ethylbenzoate**

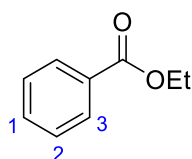

**<sup>1</sup>H NMR** (400 MHz, CDCl<sub>3</sub>) δ = 8.08 – 8.02 (m, 2H, H-3), 7.58 – 7.52 (m, 1H, H-1), 7.47 – 7.40 (m, 2H, H-2), 4.38 (q, *J* = 7.1 Hz, 2H, CH<sub>2</sub>), 1.40 (t, *J* = 7.1 Hz, 3H, CH<sub>3</sub>).

Incorporation expected at δ 8.07 – 8.03 ppm (H-3)

Determined against integral at δ 4.38 ppm (OCH<sub>2</sub>CH<sub>3</sub>)

**Nitrobenzene**

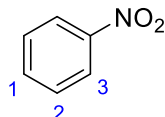

**<sup>1</sup>H NMR** (400 MHz, CDCl<sub>3</sub>) δ = 8.26 – 8.20 (m, 2H, H-3), 7.73 – 7.66 (m, 1H, H-1), 7.58 – 7.51 (m, 2H, H-2).

Incorporation expected at δ 8.26 – 8.20 ppm (H-3)

Determined against integral at δ 7.73 – 7.66 ppm (H-1)

**<sup>1</sup>H NMR** (400 MHz, DMSO-*d*<sub>6</sub>) δ = 8.30 – 8.16 (m, 2H, H-3), 7.90 – 7.79 (m, 1H, H-1), 7.73 – 7.61 (m, 2H, H-2).

Incorporation expected at δ 8.30 – 8.16 ppm (H-3)

Determined against integral at δ 7.73 – 7.61 ppm (H-2)

### Benzenesulfonamide

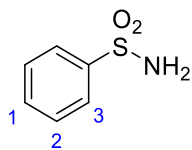

**<sup>1</sup>H NMR** (400 MHz, DMSO-*d*<sub>6</sub>)  $\delta$  = 7.87 – 7.80 (m, 2H, H-3), 7.64 – 7.54 (m, 3H, H-1 and H-2), 7.36 (bs, 2H, NH<sub>2</sub>)

Incorporation expected at  $\delta$  7.87 – 7.80 ppm (H-3)

Determined against integral at  $\delta$  7.64 – 7.54 ppm (H-1+H-2)

### (Methylsulfonyl)benzene

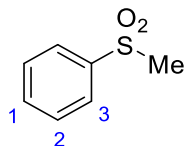

**<sup>1</sup>H NMR** (400 MHz, DMSO-*d*<sub>6</sub>)  $\delta$  = 7.95 – 7.92 (m, 2H, H-3), 7.76 – 7.72 (m, 1H, H-1), 7.68 – 7.64 (m, 2H, H-2), 3.21 (s, 3H, H-4).

Incorporation expected at  $\delta$  7.95 – 7.92 ppm (H-3)

Determined against integral at  $\delta$  7.68 – 7.64 ppm (H-2)

### Acetanilide

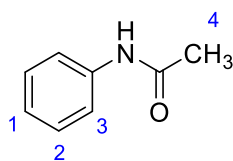

**<sup>1</sup>H NMR** (400 MHz, DMSO-*d*<sub>6</sub>)  $\delta$  = 9.90 (bs, 1H, NH), 7.60 – 7.55 (m, 2H, H-3), 7.30 – 7.24 (m, 2H, H-2), 7.04 – 6.99 (m, 1H, H-1), 2.04 (s, 3H, H-4).

Incorporation expected at  $\delta$  7.60 – 7.55 ppm (H-3)

Determined against integral at  $\delta$  2.04 ppm (H-4)

### 2-phenylpyridine

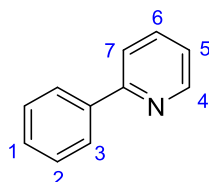

**<sup>1</sup>H NMR** (400 MHz, CDCl<sub>3</sub>)  $\delta$  = 8.73 – 8.67 (m, 1H, H-4), 8.02 – 7.98 (m, 2H, H-3), 7.78 – 7.70 (m, 2H, H-6 and H-7), 7.51 – 7.45 (m, 2H, H-2), 7.45 – 7.39 (m, 1H, H-1), 7.25 – 7.21 (m, 1H, H-5).

Incorporation expected at  $\delta$  8.02 – 7.98 ppm (H-3)

Determined against integral at  $\delta$  8.73 – 8.67 ppm (H-4) or at  $\delta$  7.78 – 7.70 (H-6+H-7) depending on the competition partner.

**<sup>1</sup>H NMR** (400 MHz, DMSO- *d*<sub>6</sub>)  $\delta$  = 8.69 – 8.65 (m, 1H, H-4), 8.11 – 8.06 (m, 2H, H-3), 7.97 – 7.93 (m, 1H, H-7), 7.90 – 7.84 (m, 1H, H-6), 7.52 – 7.46 (m, 2H, H-2), 7.46 – 7.41 (m, 1H, H-1), 7.38 – 7.32 (m, 1H, H-5).

Incorporation expected at  $\delta$  8.11 – 8.06 ppm (H-3)

Determined against integral at  $\delta$  7.90 – 7.84 ppm (H-6)

### 2-Phenylpyrimidine

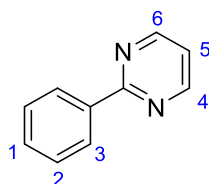

**<sup>1</sup>H NMR** (400 MHz, CDCl<sub>3</sub>)  $\delta$  = 8.81 (d, *J* = 4.9 Hz, 2H, H-4), 8.48 – 8.43 (m, 2H, H-3), 7.52 – 7.48 (m, 3H, H-1 and H-2), 7.18 (t, *J* = 4.9 Hz, 1H, H-5)

Incorporation expected at  $\delta$  8.48 – 8.43 ppm (H-3)

Determined against integral at  $\delta$  7.18 ppm (H-5)

### 1-phenylpyrazole

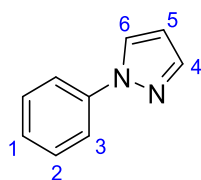

**<sup>1</sup>H NMR** (400 MHz, CDCl<sub>3</sub>)  $\delta$  = 7.92 (d, *J* = 2.2 Hz, 1H, H-6), 7.75 – 7.68 (m, 3H, H-3 and H-4), 7.48 – 7.43 (m, 2H, H-2), 7.32 – 7.26 (m, 1H, H-1), 6.49 – 6.45 (m, 1H, H-5).

Incorporation expected at  $\delta$  7.75 – 7.68 ppm (H-3)

Determined against integral at  $\delta$  7.92 ppm (H-6)

### 2-phenyloxazoline

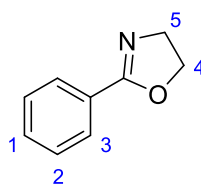

**<sup>1</sup>H NMR** (400 MHz, CDCl<sub>3</sub>)  $\delta$  = 7.97 – 7.93 (m, 2H, H-3), 7.50 – 7.44 (m, 1H, H-1), 7.43 – 7.37 (m, 2H, H-2), 4.43 (t, *J* = 9.5 Hz, 2H, H-4), 4.06 (t, *J* = 9.5 Hz, 2H, H-5).

Incorporation expected at  $\delta$  7.97 – 7.93 ppm (H-3)

Determined against integral at  $\delta$  4.43 ppm (H-4)

### 2-phenylthiazoline

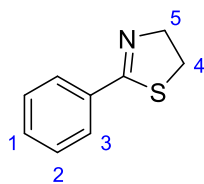

**<sup>1</sup>H NMR** (400 MHz, CDCl<sub>3</sub>)  $\delta$  = 7.86 – 7.81 (m, 2H, H-3), 7.48 – 7.37 (m, 3H, H-1 and H-2), 4.46 (t,  $J$  = 8.3 Hz, 2H, H-4), 3.41 (t,  $J$  = 8.3 Hz, 2H, H-5).

Incorporation expected at  $\delta$  7.86 – 7.81 ppm (H-3)

Determined against integral at  $\delta$  4.46 ppm (H-4)

### 2-phenylthiazole

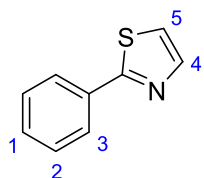

**<sup>1</sup>H NMR** (400 MHz, CDCl<sub>3</sub>)  $\delta$  = 8.00 – 7.94 (m, 2H, H-3), 7.87 (d,  $J$  = 3.3 Hz, 2H, H-4), 7.48 – 7.42 (m, 3H, H-2 and H-1), 7.33 (d,  $J$  = 3.3 Hz, 2H, H-5).

Incorporation expected at  $\delta$  8.00 – 7.94 ppm (H-3)

Determined against integral at  $\delta$  7.87 or 7.33 ppm (H-4 or H-5)

### 2-phenylbenzothiazole

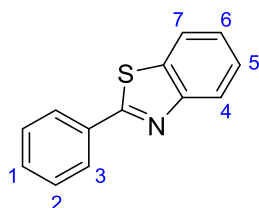

**<sup>1</sup>H NMR** (300 MHz, CDCl<sub>3</sub>)  $\delta$  = 8.14 – 8.06 (m, 3H, H-3 and H-4), 7.91 (d,  $J$  = 8.0 Hz, 1H, H-7), 7.53 – 7.48 (m, 4H, H-2 and H-5), 7.41–7.37 (m, 1H, H-6).

Incorporation expected at  $\delta$  8.14 – 8.06 ppm (H-3)

Incorporation determined against  $\delta$  7.91 ppm (H-7)

### 1-methyl-2-phenylimidazole

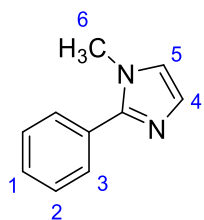

**<sup>1</sup>H NMR** (400 MHz, CDCl<sub>3</sub>)  $\delta$  = 7.65 – 7.60 (m, 2H, H-3), 7.47 – 7.34 (m, 3H, H-1 and H-2), 7.12 (d,  $J$  = 1.2 Hz, 1H, H-5), 6.97 (d,  $J$  = 1.2 Hz, 1H, H-4), 3.19 (s, 3H, H-6).

Incorporation expected at  $\delta$  7.65 – 7.60 ppm (H-3)

Incorporation determined against  $\delta$  7.12 ppm (H-5)

### 2-phenylimidazole

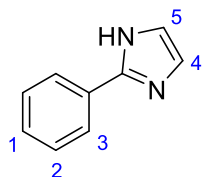

**<sup>1</sup>H NMR** (400 MHz, DMSO-*d*<sub>6</sub>)  $\delta$  = 12.49 (bs, 1H, NH), 7.98 – 7.92 (m, 2H, H-3), 7.48 – 7.39 (2H, H-2), 7.36 – 7.29 (m, 1H, H-1), 7.13 (s, 2H, H-4 and H-5).

Incorporation expected at  $\delta$  7.98 – 7.92 ppm (H-3)

Incorporation determined against  $\delta$  7.13 ppm (H-4+H-5)

### 2-phenylimidazole

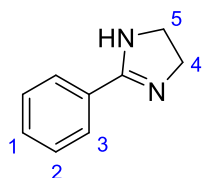

**<sup>1</sup>H NMR** (400 MHz, DMSO-*d*<sub>6</sub>)  $\delta$  = 7.86 – 7.80 (m, 2H, H-3), 7.49 – 7.36 (m, 3H, H-1 and H-2), 3.60 (s, 4H, H-4 and H-5).

Incorporation expected at  $\delta$  7.86 – 7.80 ppm (H-3)

Incorporation determined against  $\delta$  3.60 ppm (H-4+H-5)

### 3.2. Effects of the Reaction Conditions on Competition Rate Constants

The competition labelling of 2-phenylpyridine and 1-phenylpyrazole was chosen as a model reaction to test the influence of catalyst loading, reaction times and solvent on the competition rate constants  $\kappa$ .

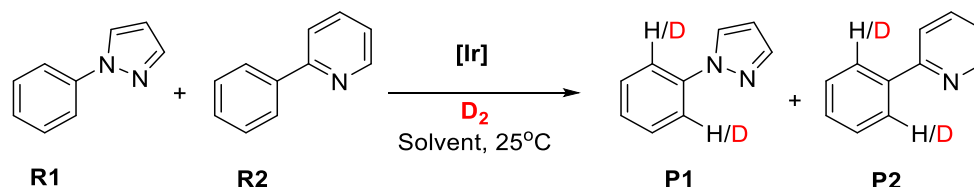

Mass of reagents: 1-Phenylpyrazole (14.4 mg, 0.1 mmol); 2-Phenylpyridine (15.5 mg, 0.1 mmol); for catalyst **Ir-2** (2.1 mg for 2.5 mol %, 4.3 mg, 5 mol. %, 6.4 mg for 7.5 mol %, 8.6 mg for 10 mol %); for catalyst **Ir-1** (8.7 mg, 5 mol %); Volume (solvent) = 6.0 mL

Deuteration expected at  $\delta$  (**R1**) = 7.78 – 7.67 ppm and at  $\delta$  (**R2**) = 8.04 – 7.97 ppm

Determined against integral at  $\delta$  6.50 – 6.42 for **R1** and at  $\delta$  8.72 – 8.68 for **R2**

*Spectral details of the reaction mixture:*

$^1H$  NMR (400 MHz,  $CDCl_3$ )  $\delta$  = 8.72 – 8.68 (m, 1H, **R2**), 8.04 – 7.97 (m, 2H/D **R2**), 7.92 (d,  $J$  = 2.4 Hz, 1H, **R1**), 7.78 – 7.67 (m, 2H, **R2**, 1H, **R1**, 2H/D **R1**), 7.52 – 7.38 (3H, **R2** and 2H, **R1**), 7.31 – 7.26 (m, 1H, **R1**), 7.24 – 7.20 (m, 1H, **R2**), 6.50 – 6.42 (m, 1H, **R1**)

#### Catalyst loading

Competition experiments between 2-phenylpyridine and 1-phenylpyrazole with different loadings of the catalyst **Ir-2** (2.5 to 10 mol %) were performed in DCM (6.0 mL) following General Procedure GP1 for intermolecular competition experiments (time (t) = 16 h).

**Table S1.** Competition labelling of 1-phenylpyrazole and 2-phenylpyridine using different loadings of catalyst **Ir-2**.

| Entry | catalyst loading (mol %) | $I_{R1(t)}$<br>N = 2H | $I_{R1(0)}$<br>N = 1H | %D <sub>R1</sub> | $I_{R2(t)}$<br>N = 2H | $I_{R2(0)}$<br>N = 1H | %D <sub>R2</sub> | $\kappa$ |
|-------|--------------------------|-----------------------|-----------------------|------------------|-----------------------|-----------------------|------------------|----------|
| 1     | 2.5                      | 1.40 <sup>a</sup>     | 1.00                  | 30               | 1.32                  | 0.86                  | 23               | 1.35     |
| 2     | 5.0                      | 1.29 <sup>b</sup>     | 1.00                  | 36               | 1.22                  | 0.85                  | 28               | 1.32     |
| 3     | 7.5                      | 1.48 <sup>c</sup>     | 1.00                  | 26               | 1.43                  | 0.94                  | 24               | 1.10     |
| 4     | 10                       | 1.17 <sup>d</sup>     | 1.00                  | 42               | 1.09                  | 0.91                  | 40               | 1.05     |

<sup>a</sup>  $I_{R1(t)} = 4.12 - 1.00 - (0.86 \times 2)$ ; <sup>b</sup>  $I_{R1(t)} = 3.99 - 1.00 - (0.85 \times 2)$ ;

<sup>c</sup>  $I_{R1(t)} = 4.36 - 1.00 - (0.94 \times 2)$ ; <sup>d</sup>  $I_{R1(t)} = 3.99 - 1.00 - (0.91 \times 2)$

D320014  
 Person kpb19112  
 DT-19-4  
 @proton CDCl<sub>3</sub> {C:\NMRdata} DJN 50

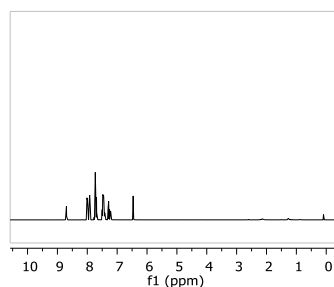

8.71  
 8.69

8.01  
 7.99  
 7.92  
 7.92  
 7.77  
 7.75  
 7.73  
 7.71  
 7.69  
 7.50  
 7.48  
 7.46  
 7.44  
 7.42  
 7.40  
 7.30  
 7.28  
 7.27  
 7.24  
 7.23  
 7.22  
 7.21

6.47  
 6.46  
 6.46

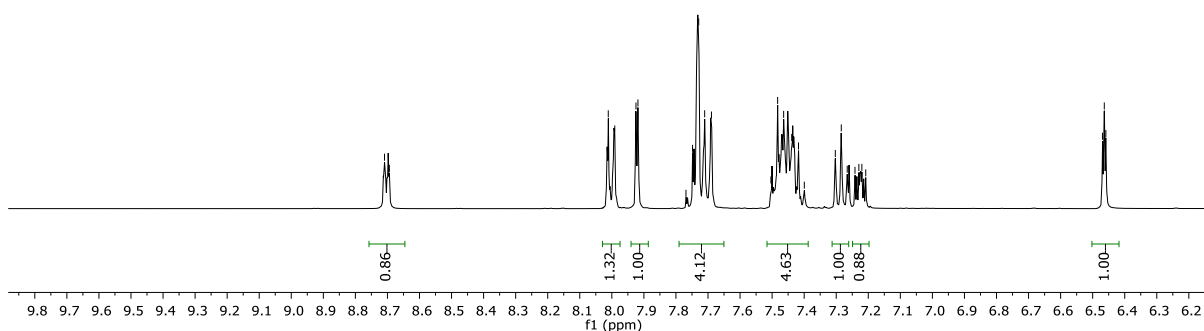

**Figure S3.** <sup>1</sup>H NMR (400 MHz, CDCl<sub>3</sub>) of the competition experiment between 1-phenylpyrazole and 2-phenylpyridine (entry 1, Table S1)

D320015  
 Person kpb19112  
 DT-19-5  
 @proton CDCl<sub>3</sub> {C:\NMRdata} DJN 51

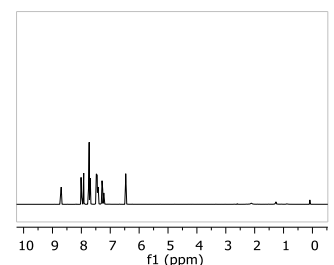

8.71  
 8.70

8.01  
 7.99  
 7.93  
 7.92  
 7.77  
 7.74  
 7.73  
 7.71  
 7.69  
 7.50  
 7.48  
 7.46  
 7.44  
 7.42  
 7.40  
 7.30  
 7.28  
 7.27  
 7.24  
 7.23  
 7.22  
 7.21

6.47  
 6.46  
 6.46

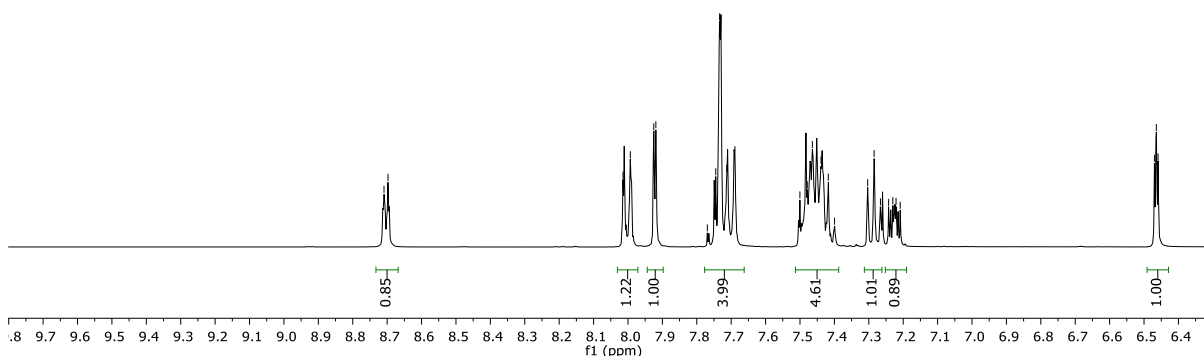

**Figure S4.** <sup>1</sup>H NMR (400 MHz, CDCl<sub>3</sub>) of the competition experiment between 1-phenylpyrazole and 2-phenylpyridine (entry 2, Table S1)



D320041  
 Person kpb19112  
 DT-19-6  
 @proton CDCl3 {C:\NMRdata} DJN 61

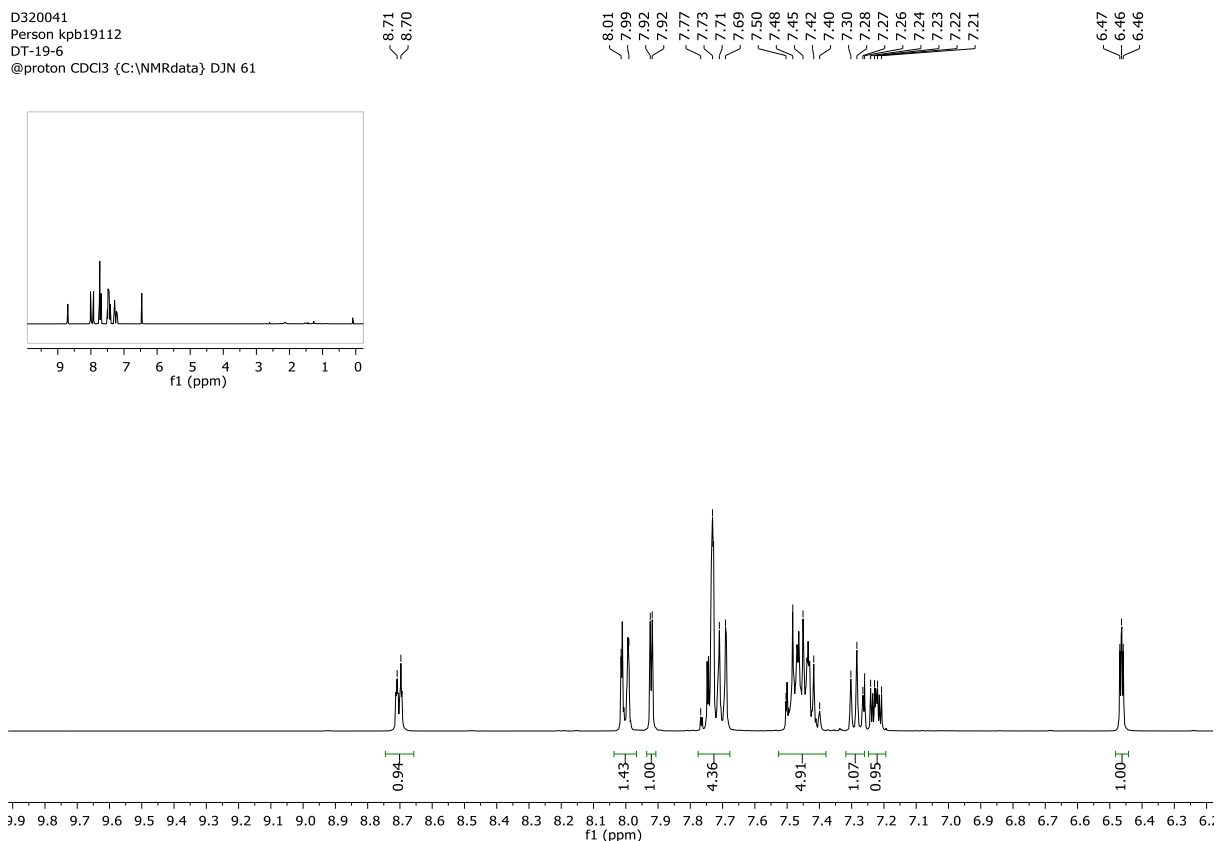

**Figure S5.**  $^1\text{H}$  NMR (400 MHz,  $\text{CDCl}_3$ ) of the competition experiment between 1-phenylpyrazole and 2-phenylpyridine (entry 3, Table S1)

D320042  
 Person kpb19112  
 DT-19-7  
 @proton CDCl3 {C:\NMRdata} DJN 62

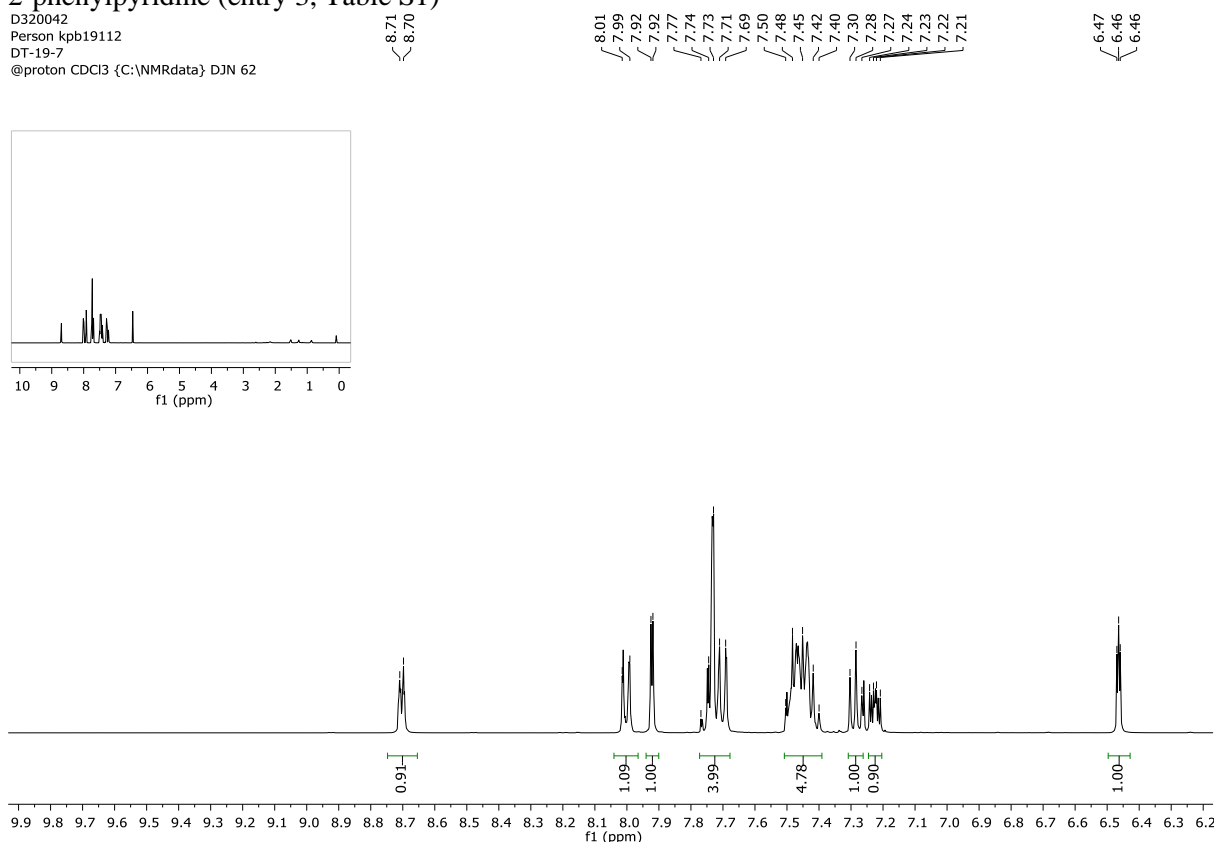

**Figure S6.**  $^1\text{H}$  NMR (400 MHz,  $\text{CDCl}_3$ ) of the competition experiment between 1-phenylpyrazole and 2-phenylpyridine (entry 4, Table S1)

## Time-dependence

Competition experiments between 1-phenylpyrazole and 2-phenylpyridine with the catalyst **Ir-2** (5 mol %) were performed in DCM (6.0 mL) over different time periods following the General Procedure GP1 for intermolecular competition experiments.

**Table S2.** Competition labelling of 1-phenylpyrazole and 2-phenylpyridine using catalyst **Ir-2** over different time periods.

| Entry | reaction time | $I_{R1(t)}$<br>N = 2H | $I_{R1(0)}$<br>N = 1H | %D <sub>R1</sub> | $I_{R2(t)}$<br>N = 2H | $I_{R2(0)}$<br>N = 1H | %D <sub>R2</sub> | $\kappa$ |
|-------|---------------|-----------------------|-----------------------|------------------|-----------------------|-----------------------|------------------|----------|
| 1     | 1h            | 1.92 <sup>a</sup>     | 1.00                  | 4                | 1.55                  | 0.80                  | 3                | 1.29     |
| 2     | 2h            | 1.89 <sup>b</sup>     | 1.00                  | 6                | 1.75                  | 0.91                  | 4                | 1.44     |
| 3     | 16h           | 1.65 <sup>c</sup>     | 1.00                  | 18               | 1.75                  | 1.00                  | 13               | 1.44     |

<sup>a</sup>  $I_{R1(t)} = 4.52 - 1.00 - (0.80 \times 2)$ ; <sup>b</sup>  $I_{R1(t)} = 4.71 - 1.00 - (0.91 \times 2)$ ; <sup>c</sup>  $I_{R1(t)} = 4.65 - 1.00 - (1.00 \times 2)$ ;

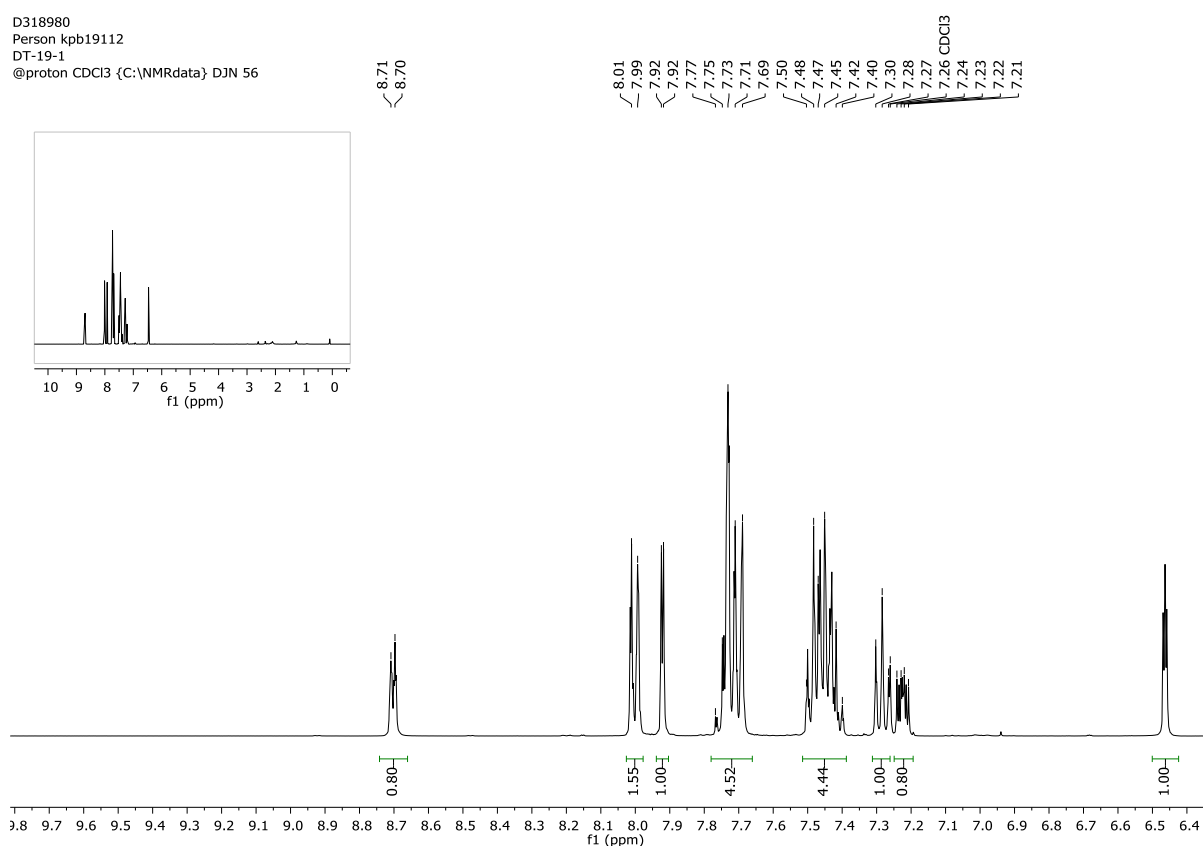

**Figure S7.**  $^1\text{H}$  NMR (400 MHz,  $\text{CDCl}_3$ ) of the competition experiment between 1-phenylpyrazole and 2-phenylpyridine (entry 1, Table S2)

D319150  
 Person kpb19112  
 DT-19-2  
 @proton CDCl3 {C:\NMRdata} DJN 14

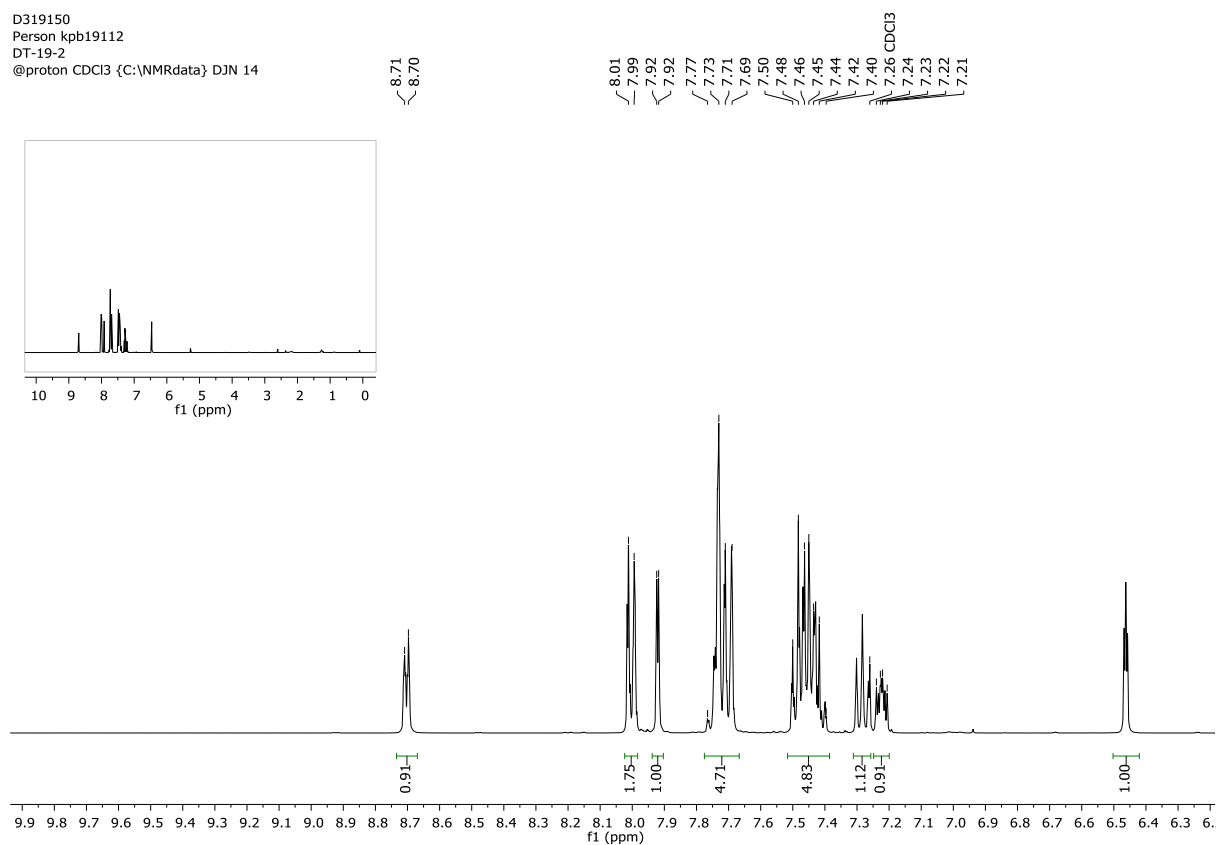

**Figure S8.**  $^1\text{H}$  NMR (400 MHz,  $\text{CDCl}_3$ ) of the competition experiment between 1-phenylpyrazole and 2-phenylpyridine (entry 2, Table S2)

D319184  
 Person kpb19112  
 DT-19-3  
 @proton CDCl3 {C:\NMRdata} DJN 44

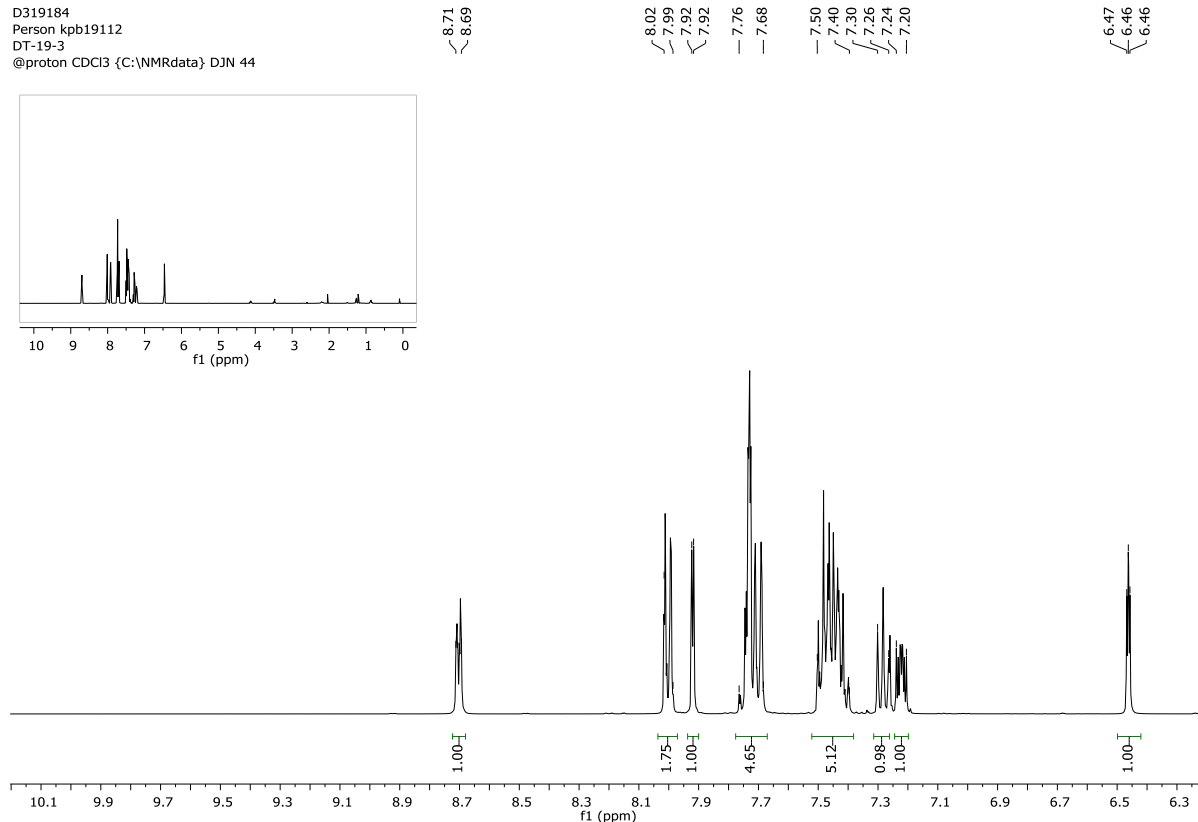

**Figure S9.**  $^1\text{H}$  NMR (400 MHz,  $\text{CDCl}_3$ ) of the competition experiment between 1-phenylpyrazole and 2-phenylpyridine (entry 3, Table S2)

## Solvent effects

Competition experiments between 1-phenylpyrazole and 2-phenylpyridine with the catalyst **Ir-1** (5 mol %) were performed in various solvents (6.0 mL) following the General Procedure GP1 for intermolecular competition experiments (time (t) = 1 h).

**Table S3.** Competition labelling of 1-phenylpyrazole and 2-phenylpyridine using catalyst **Ir-1** in different solvents.

| Solvent                                                                                                                                                                          | Entry | $I_{R1(t)}$<br>N = 2H | $I_{R1(0)}$<br>N = 1H | %D <sub>R1</sub> | $I_{R2(t)}$<br>N = 2H | $I_{R2(0)}$<br>N = 1H | %D <sub>R2</sub> | $\kappa$ |
|----------------------------------------------------------------------------------------------------------------------------------------------------------------------------------|-------|-----------------------|-----------------------|------------------|-----------------------|-----------------------|------------------|----------|
| <b>DCM</b>                                                                                                                                                                       | 1     | 1.26 <sup>a</sup>     | 1.00                  | 37               | 1.74                  | 1.18                  | 26               | 1.49     |
|                                                                                                                                                                                  | 2     | 0.90 <sup>b</sup>     | 1.00                  | 55               | 1.38                  | 1.07                  | 36               | 1.78     |
|                                                                                                                                                                                  | 3     | 0.92 <sup>c</sup>     | 1.00                  | 54               | 1.40                  | 1.08                  | 35               | 1.84     |
| <b>Average <math>\kappa</math> = 1.71</b>                                                                                                                                        |       |                       |                       |                  |                       |                       |                  |          |
| <sup>a</sup> $I_{R1(t)} = 4.62 - 1.00 - (1.18 \times 2)$ ; <sup>b</sup> $I_{R1(t)} = 4.04 - 1.00 - (1.07 \times 2)$ ; <sup>c</sup> $I_{R1(t)} = 4.08 - 1.00 - (1.08 \times 2)$ ; |       |                       |                       |                  |                       |                       |                  |          |
| <b>THF</b>                                                                                                                                                                       | 1     | 1.15 <sup>a</sup>     | 1.00                  | 43               | 1.32                  | 1.01                  | 35               | 1.30     |
|                                                                                                                                                                                  | 2     | 1.22 <sup>b</sup>     | 1.00                  | 39               | 1.36                  | 1.00                  | 32               | 1.28     |
|                                                                                                                                                                                  | 3     | 0.95 <sup>c</sup>     | 1.00                  | 53               | 1.13                  | 0.96                  | 41               | 1.40     |
| <b>Average <math>\kappa</math> = 1.33</b>                                                                                                                                        |       |                       |                       |                  |                       |                       |                  |          |
| <sup>a</sup> $I_{R1(t)} = 4.17 - 1.00 - (1.01 \times 2)$ ; <sup>b</sup> $I_{R1(t)} = 4.22 - 1.00 - (1.00 \times 2)$ ; <sup>c</sup> $I_{R1(t)} = 3.87 - 1.00 - (0.96 \times 2)$ ; |       |                       |                       |                  |                       |                       |                  |          |
| <b>Et<sub>2</sub>O</b>                                                                                                                                                           | 1     | 1.17 <sup>a</sup>     | 1.00                  | 42               | 1.39                  | 1.05                  | 34               | 1.30     |
|                                                                                                                                                                                  | 2     | 0.73 <sup>b</sup>     | 1.00                  | 64               | 0.91                  | 0.97                  | 53               | 1.33     |
|                                                                                                                                                                                  | 3     | 0.78 <sup>c</sup>     | 1.00                  | 61               | 1.03                  | 0.96                  | 46               | 1.51     |
| <b>Average <math>\kappa</math> = 1.38</b>                                                                                                                                        |       |                       |                       |                  |                       |                       |                  |          |
| <sup>a</sup> $I_{R1(t)} = 4.27 - 1.00 - (1.05 \times 2)$ ; <sup>b</sup> $I_{R1(t)} = 3.67 - 1.00 - (0.97 \times 2)$ ; <sup>c</sup> $I_{R1(t)} = 3.66 - 1.00 - (0.96 \times 2)$ ; |       |                       |                       |                  |                       |                       |                  |          |
| <b>Toluene</b>                                                                                                                                                                   | 1     | 0.98 <sup>a</sup>     | 1.00                  | 51               | 1.45                  | 1.09                  | 33               | 1.75     |
|                                                                                                                                                                                  | 2     | 0.98 <sup>b</sup>     | 1.00                  | 51               | 1.42                  | 1.06                  | 33               | 1.78     |
|                                                                                                                                                                                  | 3     | 1.11 <sup>c</sup>     | 1.00                  | 45               | 1.39                  | 0.98                  | 29               | 1.71     |
| <b>Average <math>\kappa</math> = 1.75</b>                                                                                                                                        |       |                       |                       |                  |                       |                       |                  |          |
| <sup>a</sup> $I_{R1(t)} = 4.16 - 1.00 - (1.09 \times 2)$ ; <sup>b</sup> $I_{R1(t)} = 4.10 - 1.00 - (1.06 \times 2)$ ; <sup>c</sup> $I_{R1(t)} = 4.07 - 1.00 - (0.98 \times 2)$ ; |       |                       |                       |                  |                       |                       |                  |          |
| <b>EtOAc</b>                                                                                                                                                                     | 1     | 1.38 <sup>a</sup>     | 1.00                  | 31               | 1.28                  | 0.98                  | 35               | 0.87     |
|                                                                                                                                                                                  | 2     | 0.90 <sup>b</sup>     | 1.00                  | 55               | 0.84                  | 1.00                  | 58               | 0.92     |
|                                                                                                                                                                                  | 3     | 0.88 <sup>c</sup>     | 1.00                  | 56               | 0.82                  | 1.00                  | 59               | 0.92     |
| <b>Average <math>\kappa</math> = 0.90</b>                                                                                                                                        |       |                       |                       |                  |                       |                       |                  |          |
| <sup>a</sup> $I_{R1(t)} = 4.34 - 1.00 - (0.98 \times 2)$ ; <sup>b</sup> $I_{R1(t)} = 3.90 - 1.00 - (1.00 \times 2)$ ; <sup>c</sup> $I_{R1(t)} = 3.88 - 1.00 - (1.00 \times 2)$ ; |       |                       |                       |                  |                       |                       |                  |          |

D318481  
 Person kpb19112  
 DT-11-1  
 @proton CDCl3 {C:\NMRdata} DJN 22

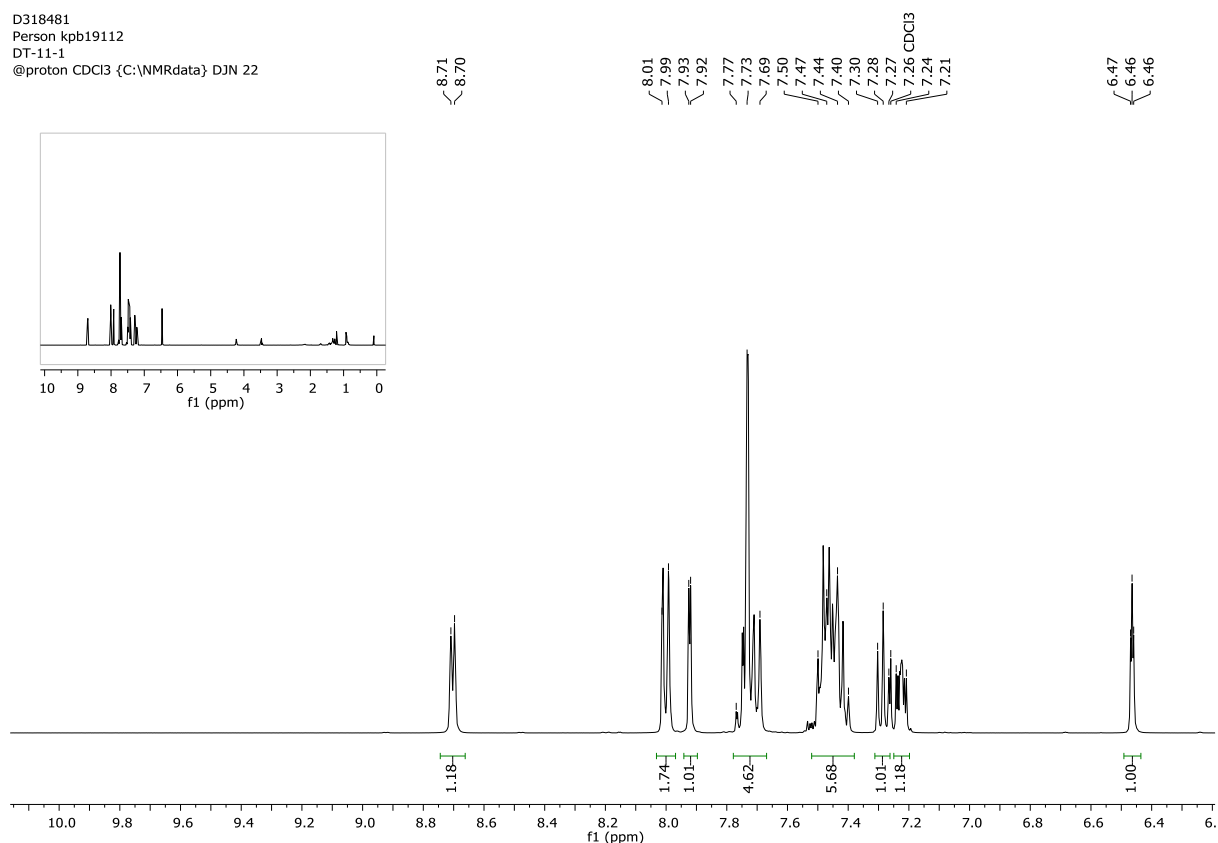

**Figure S10.**  $^1\text{H}$  NMR (400 MHz,  $\text{CDCl}_3$ ) of the competition experiment between 1-phenylpyrazole and 2-phenylpyridine (DCM-entry 1, Table S3)

D318482  
 Person kpb19112  
 DT-11-2  
 @proton CDCl3 {C:\NMRdata} DJN 23

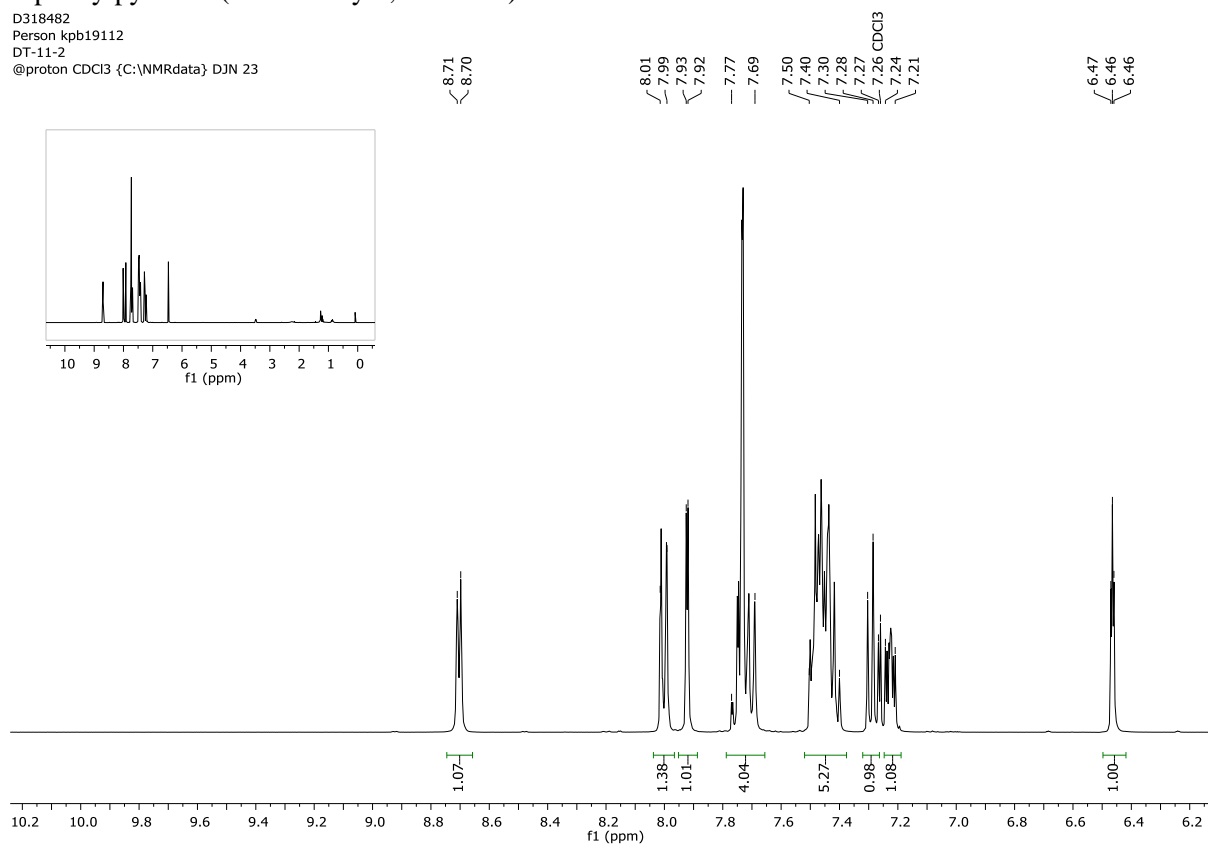

**Figure S11.**  $^1\text{H}$  NMR (400 MHz,  $\text{CDCl}_3$ ) of the competition experiment between 1-phenylpyrazole and 2-phenylpyridine (DCM-entry 2, Table S3)

D318483  
 Person kpb19112  
 DT-11-3  
 @proton CDCl3 {C:\NMRdata} DJN 24

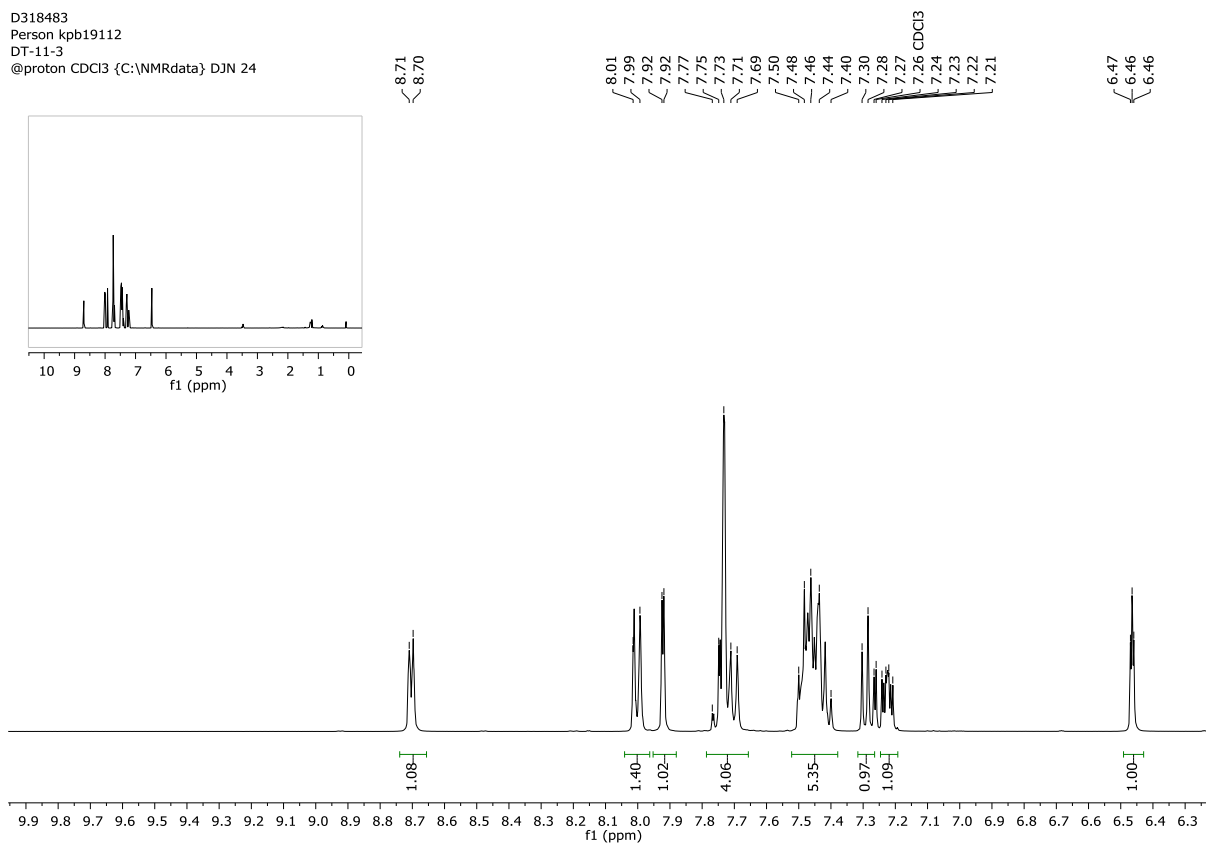

**Figure S12.**  $^1\text{H}$  NMR (400 MHz,  $\text{CDCl}_3$ ) of the competition experiment between 1-phenylpyrazole and 2-phenylpyridine (DCM-entry 3, Table S3)

D328671  
 Person kpb19112  
 DT-91-2-THF  
 @proton CDCl3 {C:\NMRdata} DJN 56

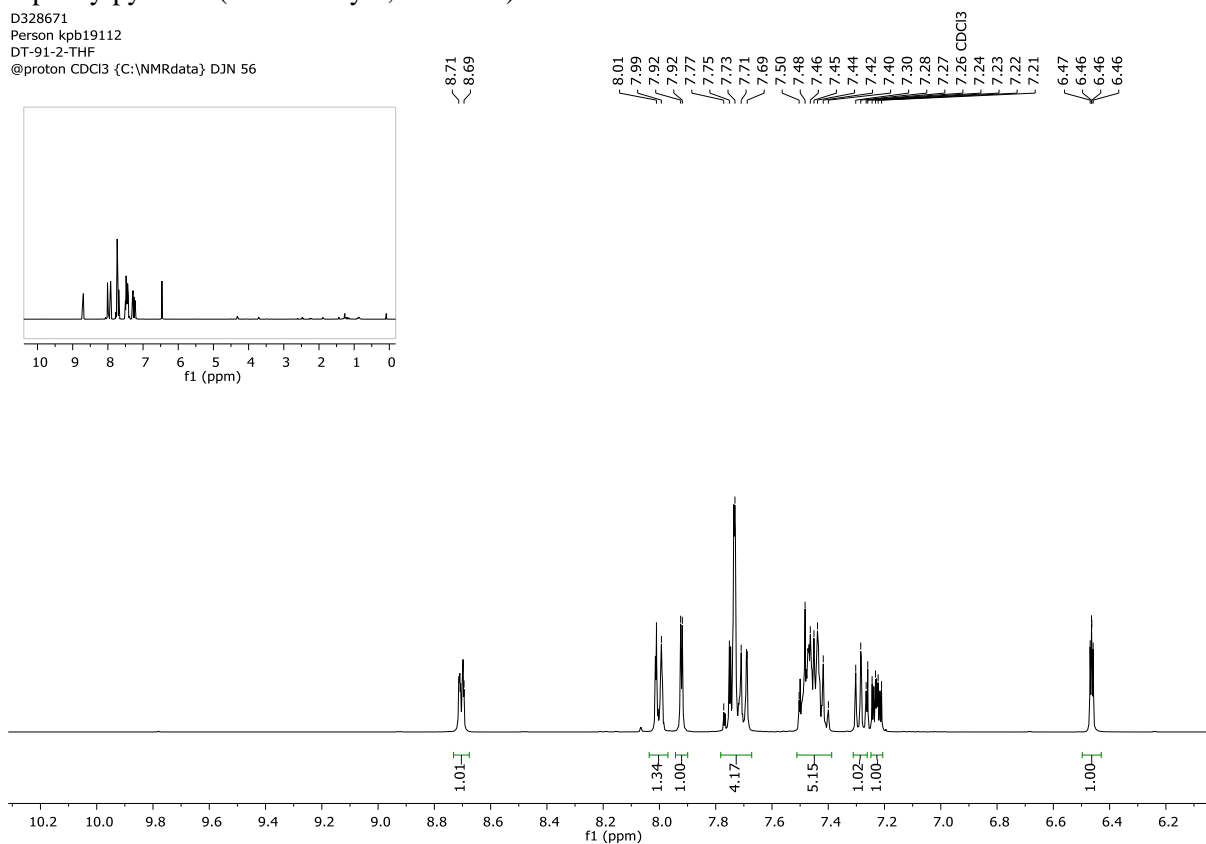

**Figure S13.**  $^1\text{H}$  NMR (400 MHz,  $\text{CDCl}_3$ ) of the competition experiment between 1-phenylpyrazole and 2-phenylpyridine (THF-entry 1, Table S3)

D329236  
 Person kpb19112  
 DT-91-THF-2  
 @proton CDCl<sub>3</sub> {C:\NMRdata} DJN 95

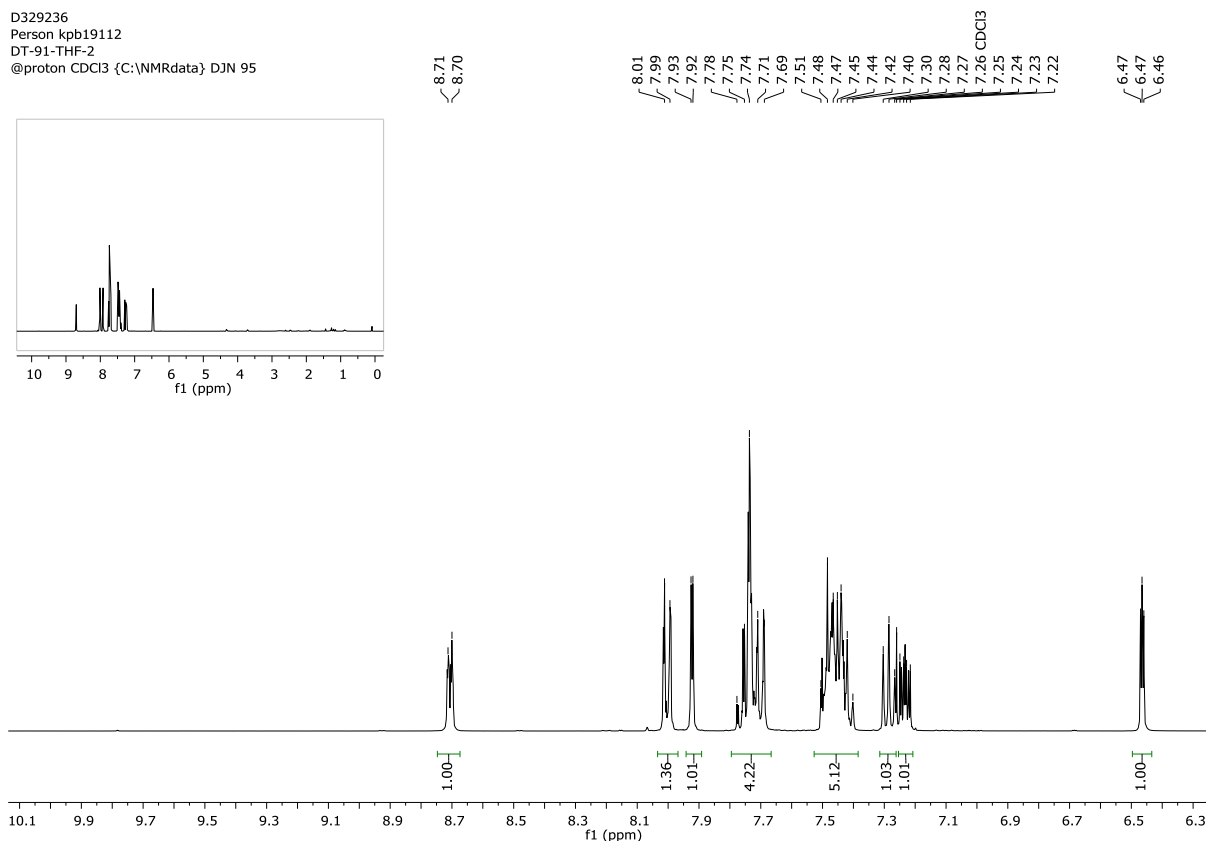

**Figure S14.** <sup>1</sup>H NMR (400 MHz, CDCl<sub>3</sub>) of the competition experiment between 1-phenylpyrazole and 2-phenylpyridine (THF-entry 2, Table S3)

D329237  
 Person kpb19112  
 DT-91-THF-3  
 @proton CDCl<sub>3</sub> {C:\NMRdata} DJN 96

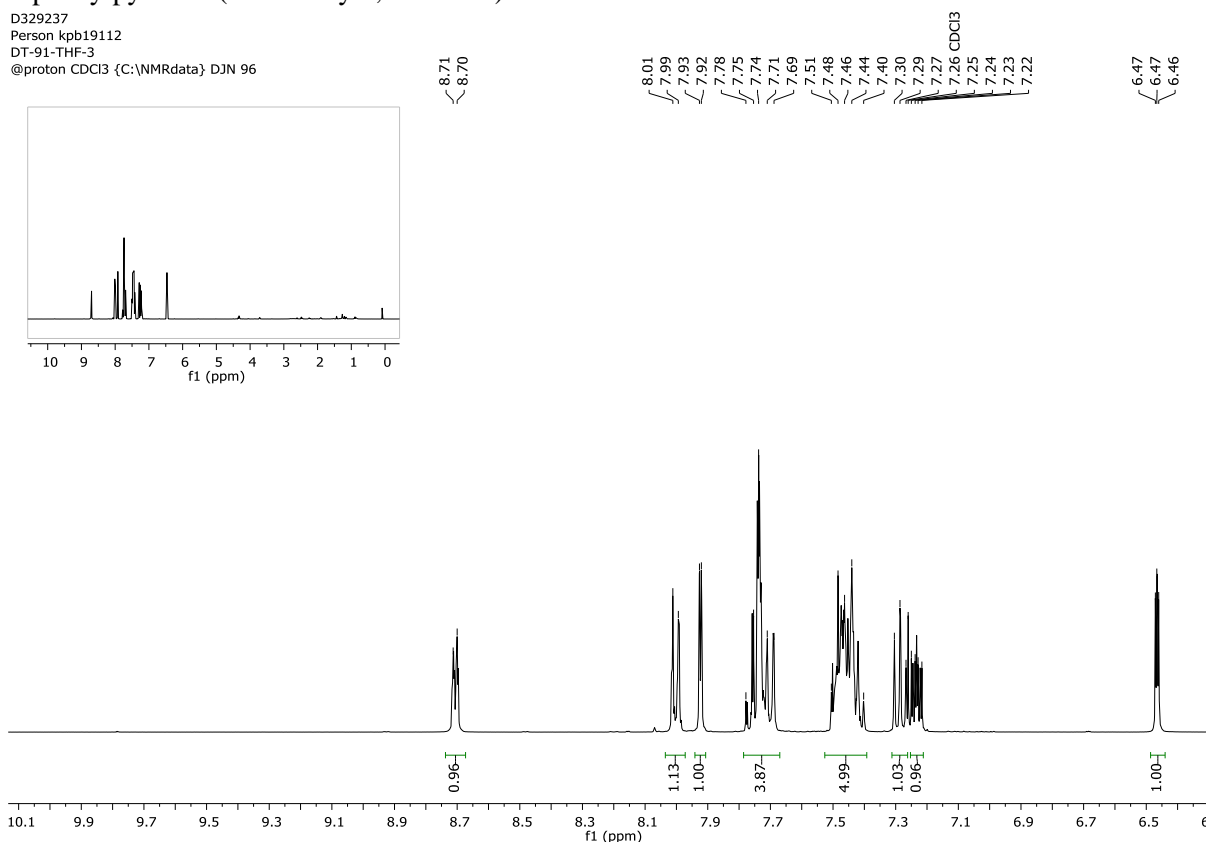

**Figure S15.** <sup>1</sup>H NMR (400 MHz, CDCl<sub>3</sub>) of the competition experiment between 1-phenylpyrazole and 2-phenylpyridine (THF-entry 3, Table S3)

D328640  
 Person kpb19112  
 DT-91-3-Et2O  
 @proton CDCl3 {C:\NMRdata} DJN 29

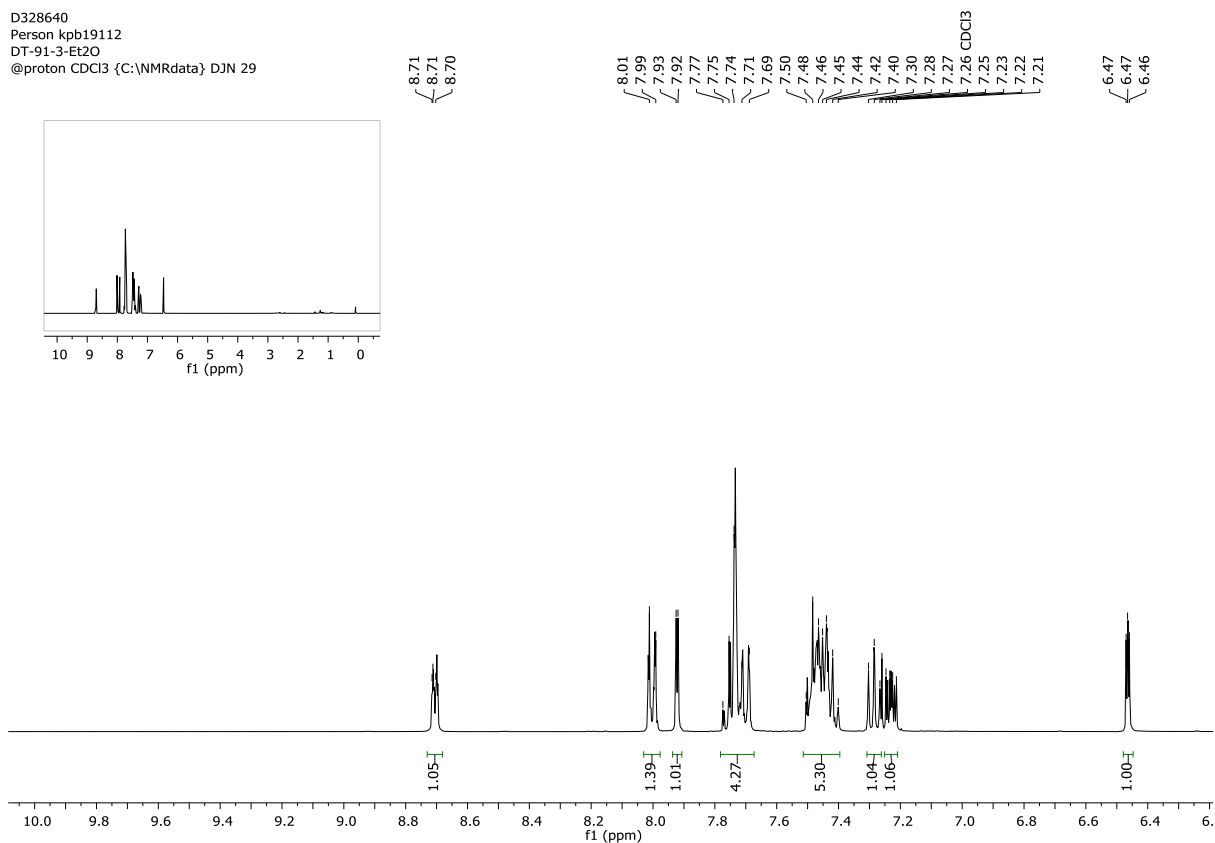

**Figure S16.**  $^1\text{H}$  NMR (400 MHz,  $\text{CDCl}_3$ ) of the competition experiment between 1-phenylpyrazole and 2-phenylpyridine ( $\text{Et}_2\text{O}$ -entry 1, Table S3)

D329289  
 Person kpb19112  
 DT-91-Et2O-2  
 @proton CDCl3 {C:\NMRdata} DJN 98

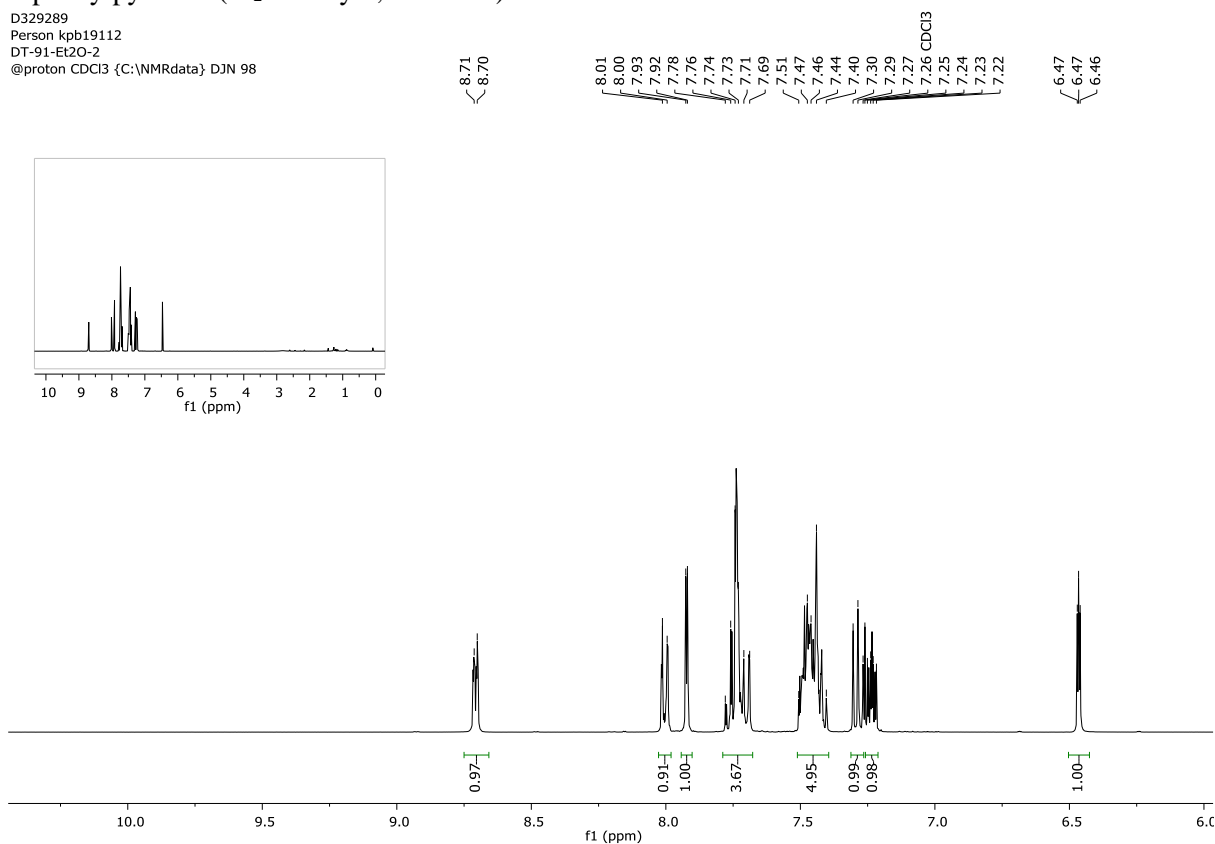

**Figure S17.**  $^1\text{H}$  NMR (400 MHz,  $\text{CDCl}_3$ ) of the competition experiment between 1-phenylpyrazole and 2-phenylpyridine ( $\text{Et}_2\text{O}$ -entry 2, Table S3)



D329290  
 Person kpb19112  
 DT-91-Et2O-3  
 @proton CDCl3 {C:\NMRdata} DJN 99

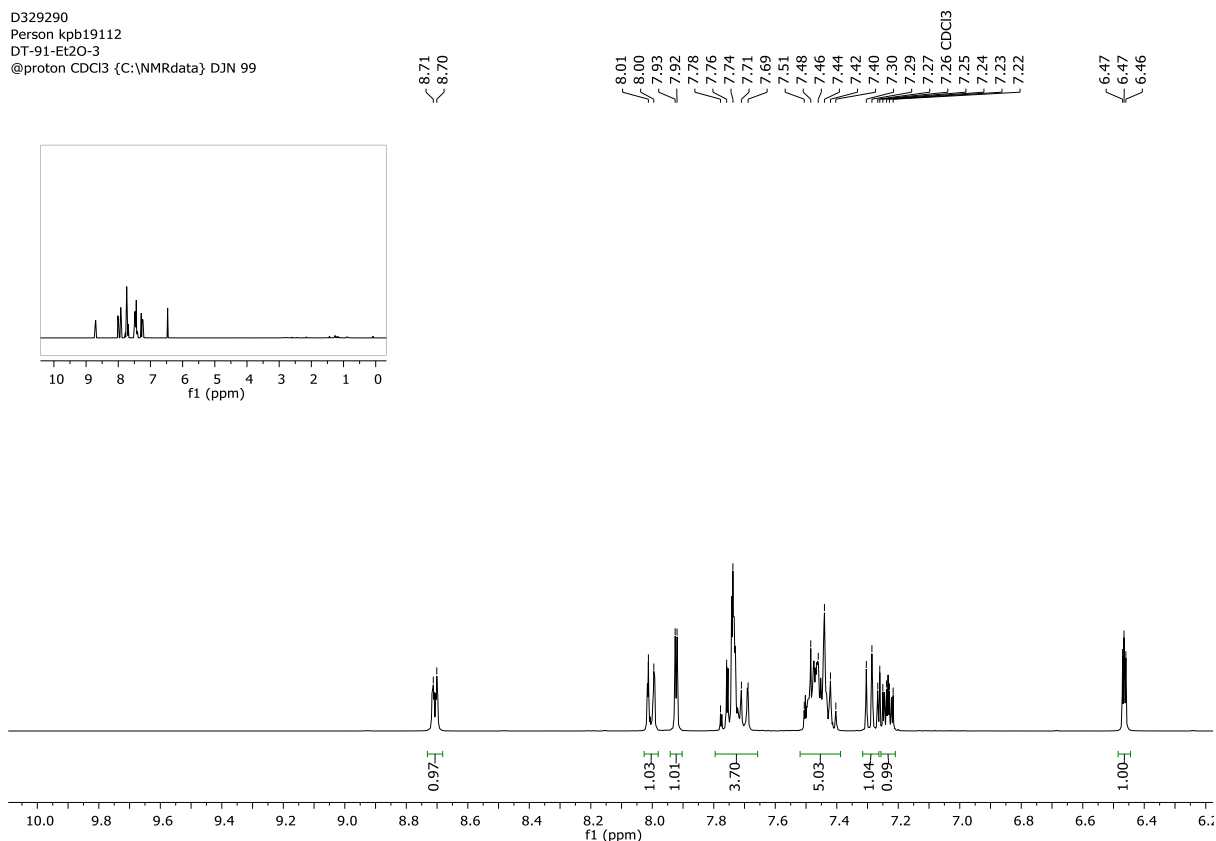

**Figure S18.**  $^1\text{H}$  NMR (400 MHz,  $\text{CDCl}_3$ ) of the competition experiment between 1-phenylpyrazole and 2-phenylpyridine ( $\text{Et}_2\text{O}$ -entry 3, Table S3)

D328670  
 Person kpb19112  
 DT-91-1-EtOAc  
 @proton CDCl3 {C:\NMRdata} DJN 55

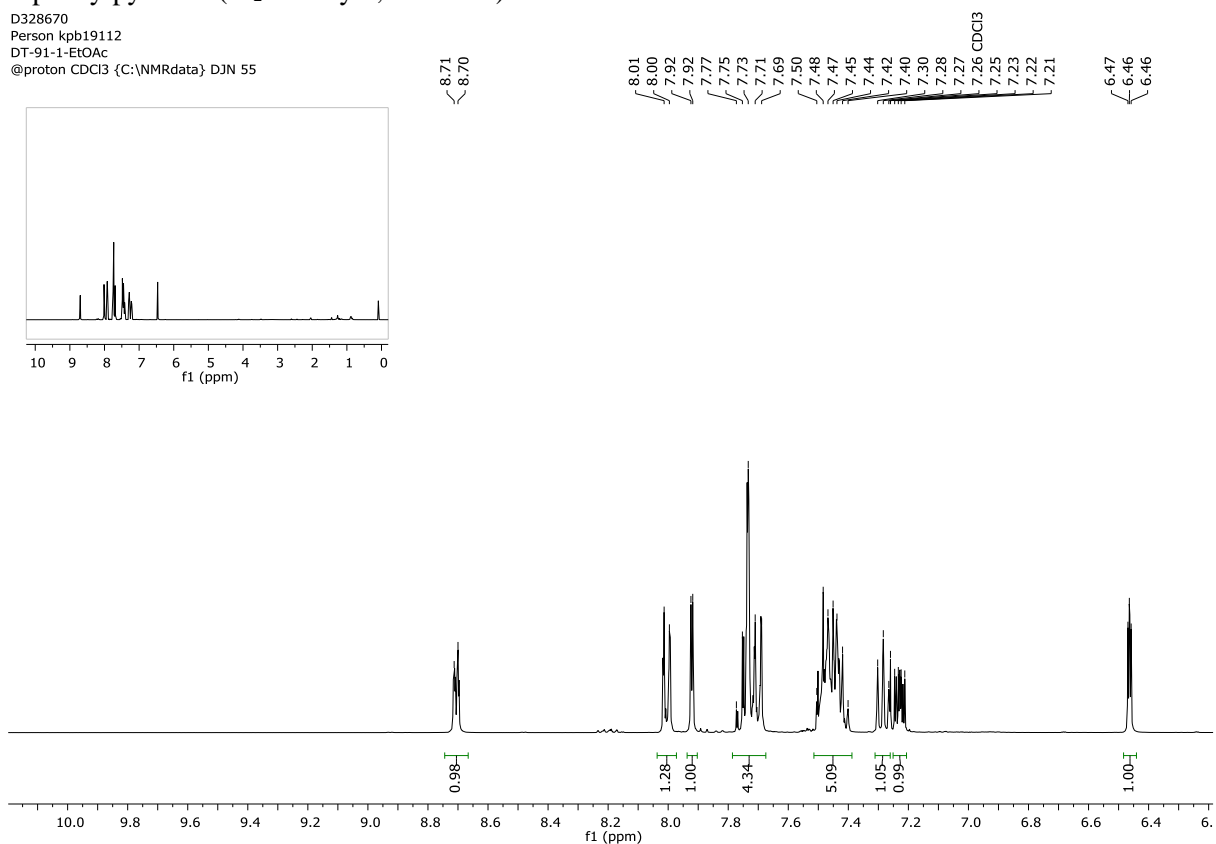

**Figure S19.**  $^1\text{H}$  NMR (400 MHz,  $\text{CDCl}_3$ ) of the competition experiment between 1-phenylpyrazole and 2-phenylpyridine ( $\text{EtOAc}$ -entry 1, Table S3)

D329234  
 Person kpb19112  
 DT-91-EtOAc-2  
 @proton CDCl3 {C:\NMRdata} DJN 93

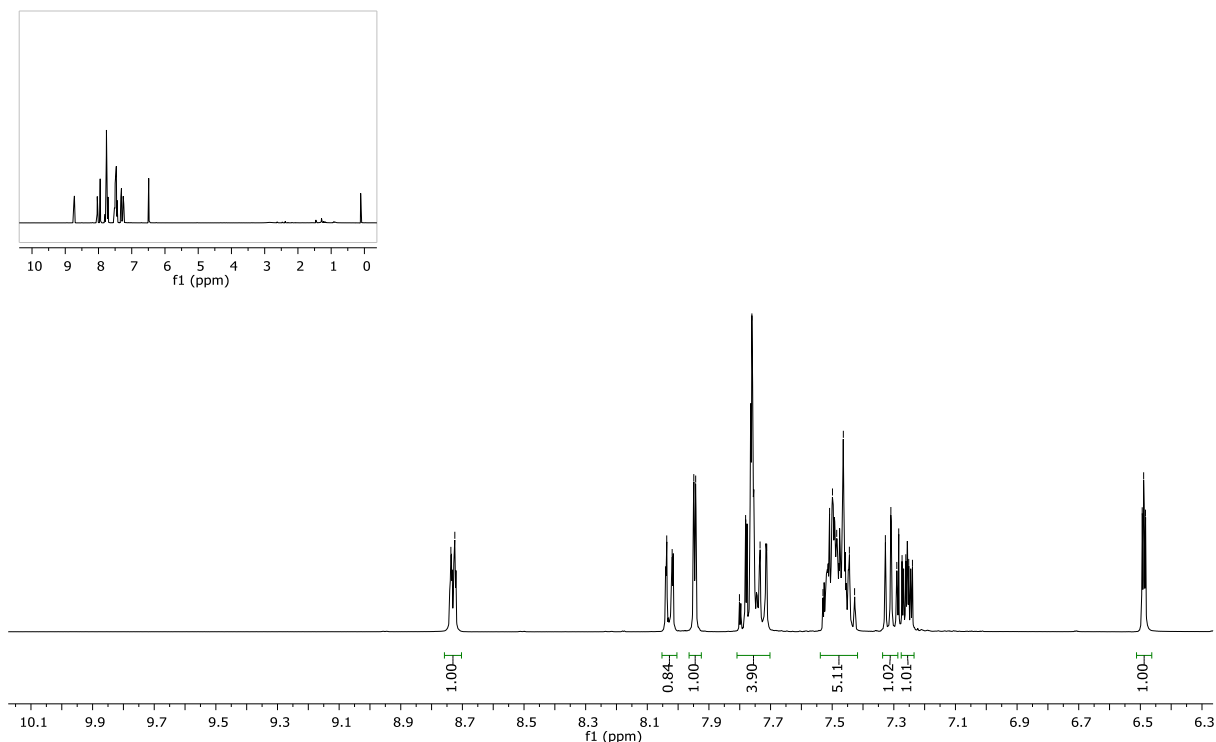

**Figure S20.**  $^1\text{H}$  NMR (400 MHz,  $\text{CDCl}_3$ ) of the competition experiment between 1-phenylpyrazole and 2-phenylpyridine (EtOAc-entry 2, Table S3)

D329235  
 Person kpb19112  
 DT-91-EtOAc-3  
 @proton CDCl3 {C:\NMRdata} DJN 94

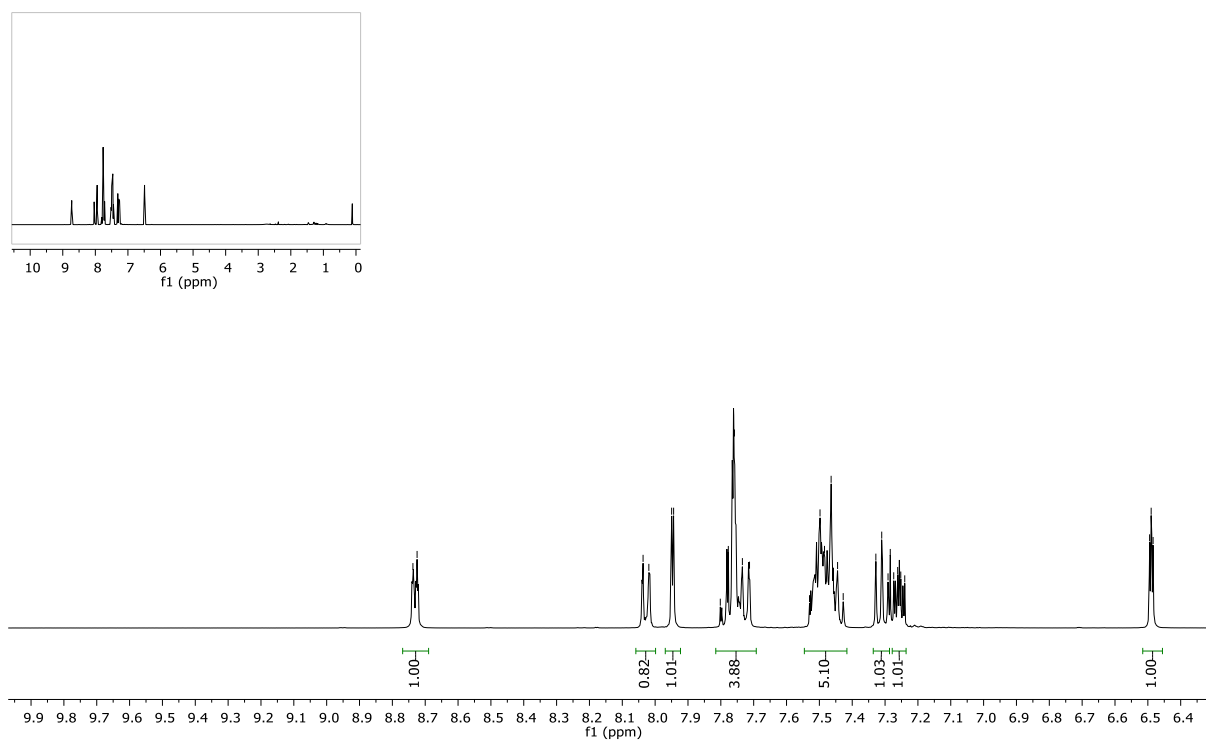

**Figure S21.**  $^1\text{H}$  NMR (400 MHz,  $\text{CDCl}_3$ ) of the competition experiment between 1-phenylpyrazole and 2-phenylpyridine (EtOAc-entry 3, Table S3)

D328641  
 Person kpb19112  
 DT-91-4-Tol  
 @proton CDCl3 {C:\NMRdata} DJN 30

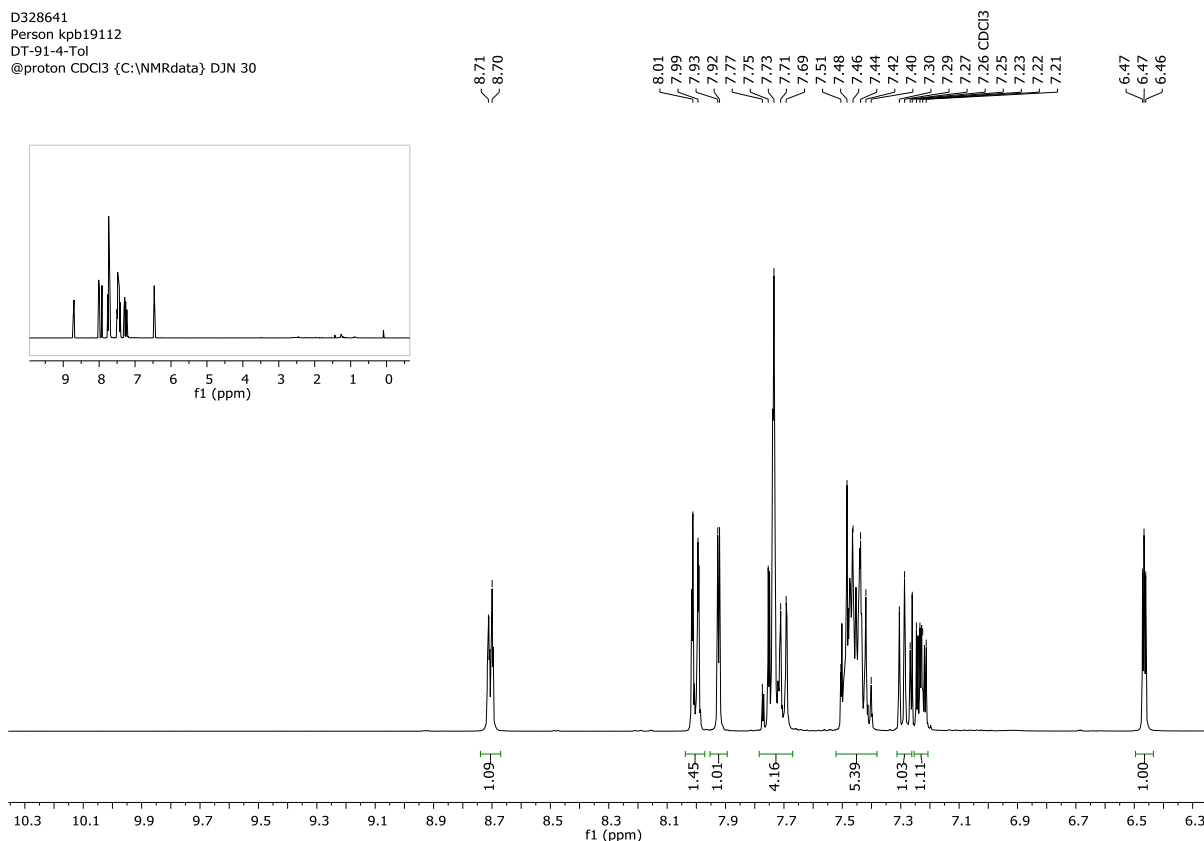

**Figure S22.**  $^1\text{H}$  NMR (400 MHz,  $\text{CDCl}_3$ ) of the competition experiment between 1-phenylpyrazole and 2-phenylpyridine (Toluene-entry 1, Table S3)

D329291  
 Person kpb19112  
 DT-91-Tol-2  
 @proton CDCl3 {C:\NMRdata} DJN 15

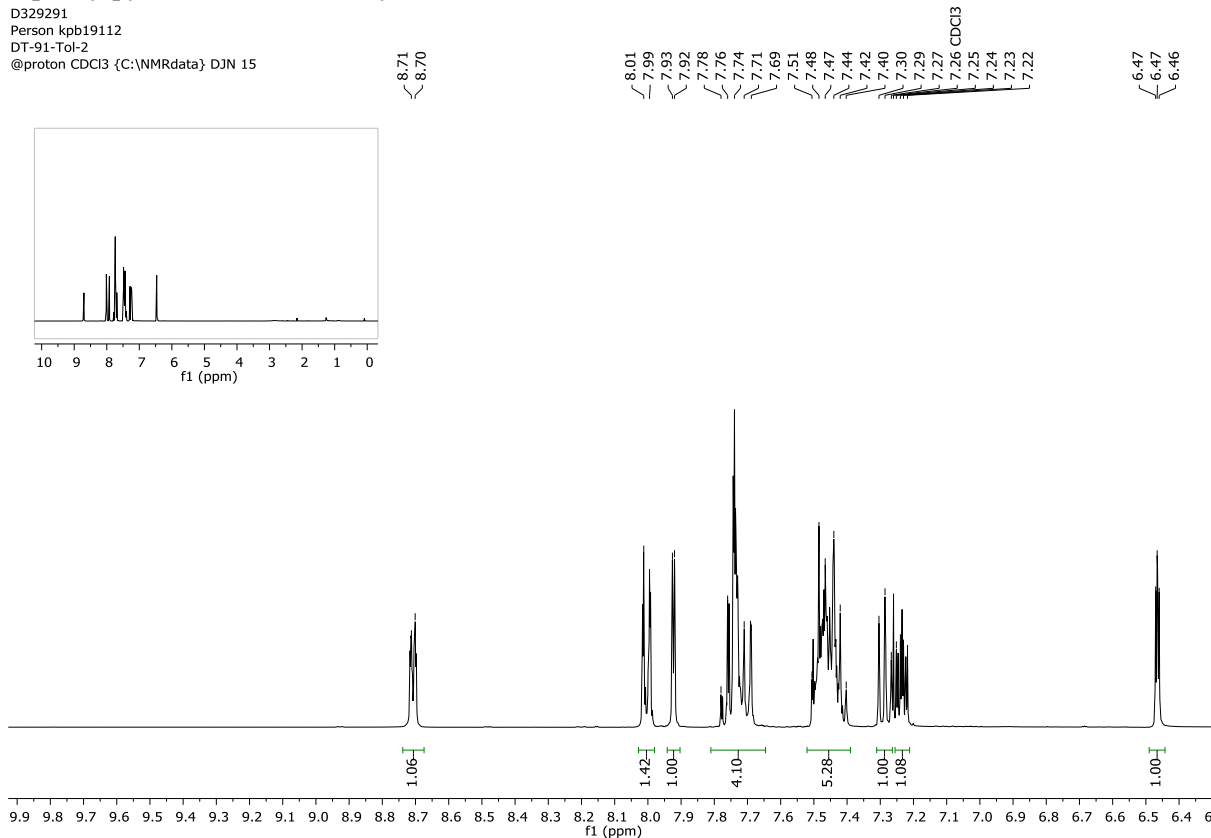

**Figure S23.**  $^1\text{H}$  NMR (400 MHz,  $\text{CDCl}_3$ ) of the competition experiment between 1-phenylpyrazole and 2-phenylpyridine (Toluene-entry 2, Table S3)

D329292  
 Person kpb19112  
 DT-91-Tol-3  
 @proton CDCl<sub>3</sub> {C:\NMRdata} DJN 101

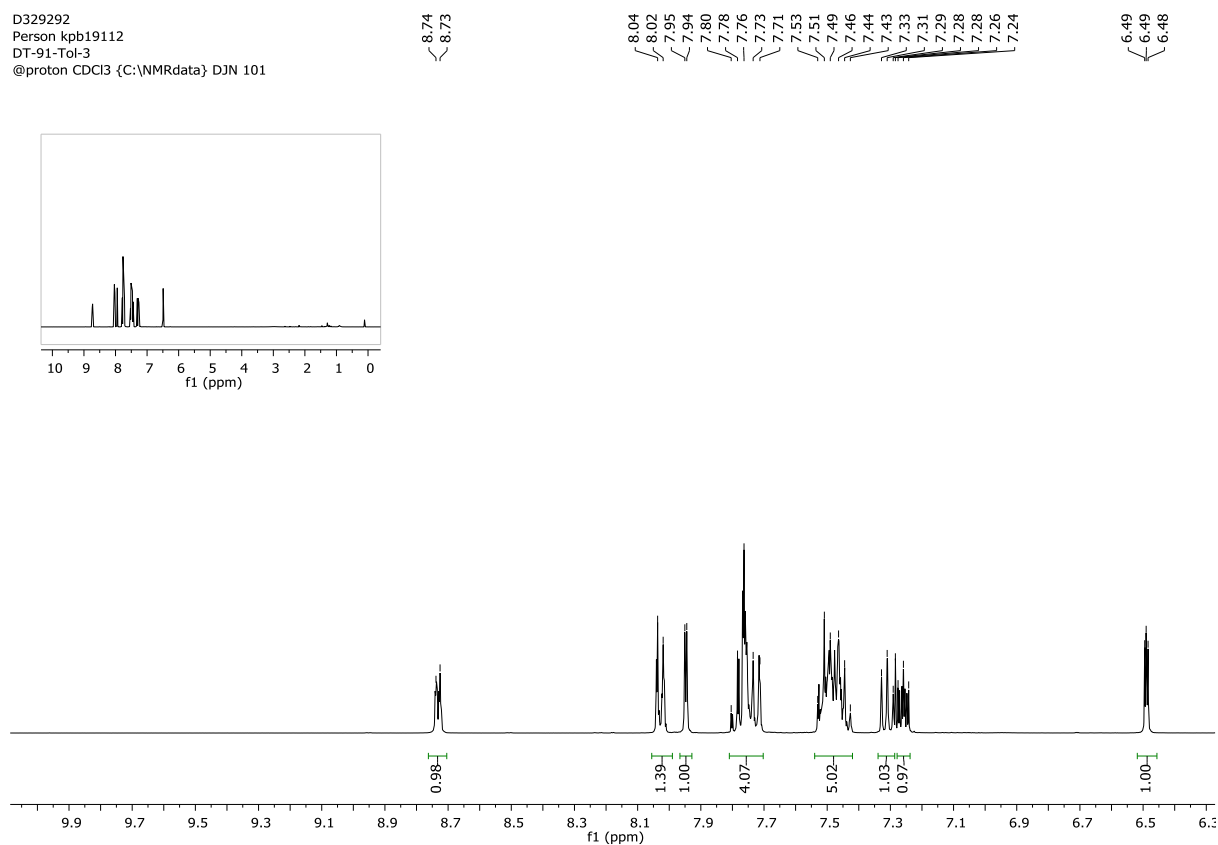

**Figure S24.** <sup>1</sup>H NMR (400 MHz, CDCl<sub>3</sub>) of the competition experiment between 1-phenylpyrazole and 2-phenylpyridine (Toluene-entry 3, Table S3)

### 3.3. Competition Experiments with [(COD)Ir(IMes)PPh<sub>3</sub>][BArF<sub>24</sub>] (Ir-1)

**Table S4.** Determination of the competition rate constant  $\kappa$  from the labelling experiment between acetophenone and benzophenone

|                                                                                                                                                                                                                                                            | Substrate <b>R1</b>                                                               | Substrate <b>R2</b>                                                               | Catalyst                                                             |                              |                              |                  |          |
|------------------------------------------------------------------------------------------------------------------------------------------------------------------------------------------------------------------------------------------------------------|-----------------------------------------------------------------------------------|-----------------------------------------------------------------------------------|----------------------------------------------------------------------|------------------------------|------------------------------|------------------|----------|
|                                                                                                                                                                                                                                                            | 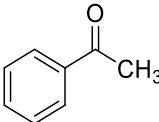 |  | <b>Ir-1</b><br>[(COD)Ir(IMes)PPh <sub>3</sub> ][BArF <sub>24</sub> ] |                              |                              |                  |          |
| Mass                                                                                                                                                                                                                                                       | 12.0 mg                                                                           | 18.2 mg                                                                           | 8.7 mg                                                               |                              |                              |                  |          |
| Deuteration expected at $\delta$ ( <b>R1</b> ) = 7.99 – 7.93 ppm and at $\delta$ ( <b>R2</b> ) = 7.84 – 7.77 ppm                                                                                                                                           |                                                                                   |                                                                                   |                                                                      |                              |                              |                  |          |
| Determined against integral at $\delta$ ( <b>R1</b> ) = 2.61 ppm and at $\delta$ ( <b>R2</b> ) = 7.63 – 7.53 ppm                                                                                                                                           |                                                                                   |                                                                                   |                                                                      |                              |                              |                  |          |
| <i>Spectral details of the deuterated reaction mixture:</i>                                                                                                                                                                                                |                                                                                   |                                                                                   |                                                                      |                              |                              |                  |          |
| <sup>1</sup> H NMR (400 MHz, CDCl <sub>3</sub> ) $\delta$ = 7.99 – 7.93 (m, 2H/D <b>R1</b> ), 7.84 – 7.77 (m, 4H/D <b>R2</b> ), 7.63 – 7.53 (m, 1H <b>R1</b> and 2H <b>R2</b> ), 5.52 – 5.42 (m, 2H <b>R1</b> and 4H <b>R2</b> ), 2.60 (s, 3H, <b>R1</b> ) |                                                                                   |                                                                                   |                                                                      |                              |                              |                  |          |
| Entry                                                                                                                                                                                                                                                      | I <sub>R1(t)</sub><br>N = 2H                                                      | I <sub>R1(0)</sub><br>N = 3H                                                      | %D <sub>R1</sub>                                                     | I <sub>R2(t)</sub><br>N = 4H | I <sub>R2(0)</sub><br>N = 2H | %D <sub>R2</sub> | $\kappa$ |
| <b>1</b>                                                                                                                                                                                                                                                   | 1.39                                                                              | 3.00                                                                              | 31                                                                   | 3.07                         | 2.22 <sup>a</sup>            | 31               | 0.99     |
| <b>2</b>                                                                                                                                                                                                                                                   | 1.08                                                                              | 3.00                                                                              | 46                                                                   | 2.65                         | 2.44 <sup>b</sup>            | 46               | 1.01     |
| <b>3</b>                                                                                                                                                                                                                                                   | 1.01                                                                              | 3.00                                                                              | 50                                                                   | 2.18                         | 2.12 <sup>c</sup>            | 49               | 1.04     |
| <b>Average <math>\kappa</math> = 1.01</b>                                                                                                                                                                                                                  |                                                                                   |                                                                                   |                                                                      |                              |                              |                  |          |
| <sup>a</sup> I <sub>R2(0)</sub> = 3.22 – (3.00/3); <sup>b</sup> I <sub>R2(0)</sub> = 3.44 – (3.00/3); <sup>c</sup> I <sub>R2(0)</sub> = 3.12 – (3.00/3);                                                                                                   |                                                                                   |                                                                                   |                                                                      |                              |                              |                  |          |

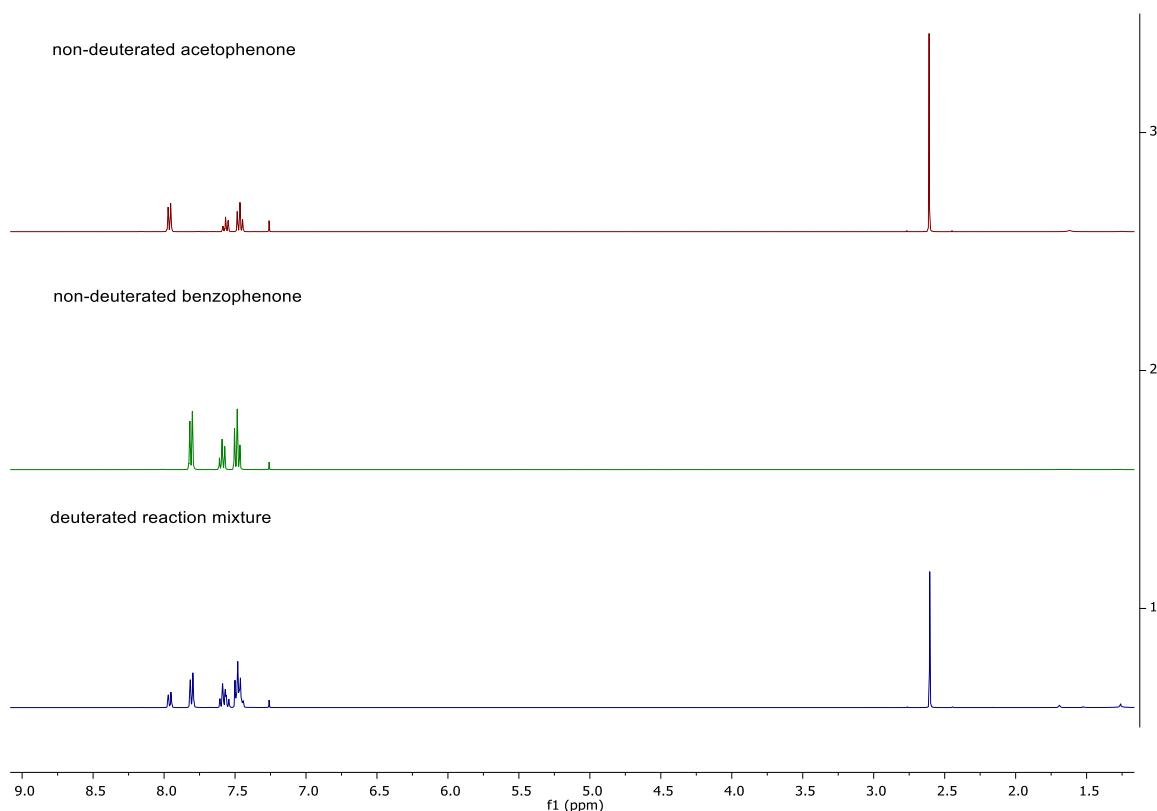

**Figure S25.** Stacked <sup>1</sup>H NMR (400 MHz, CDCl<sub>3</sub>) of non-deuterated substrates and reaction mixture.

D318492  
 Person kpb19112  
 DT-10-1  
 @proton CDCl3 {C:\NMRdata} DJN 33

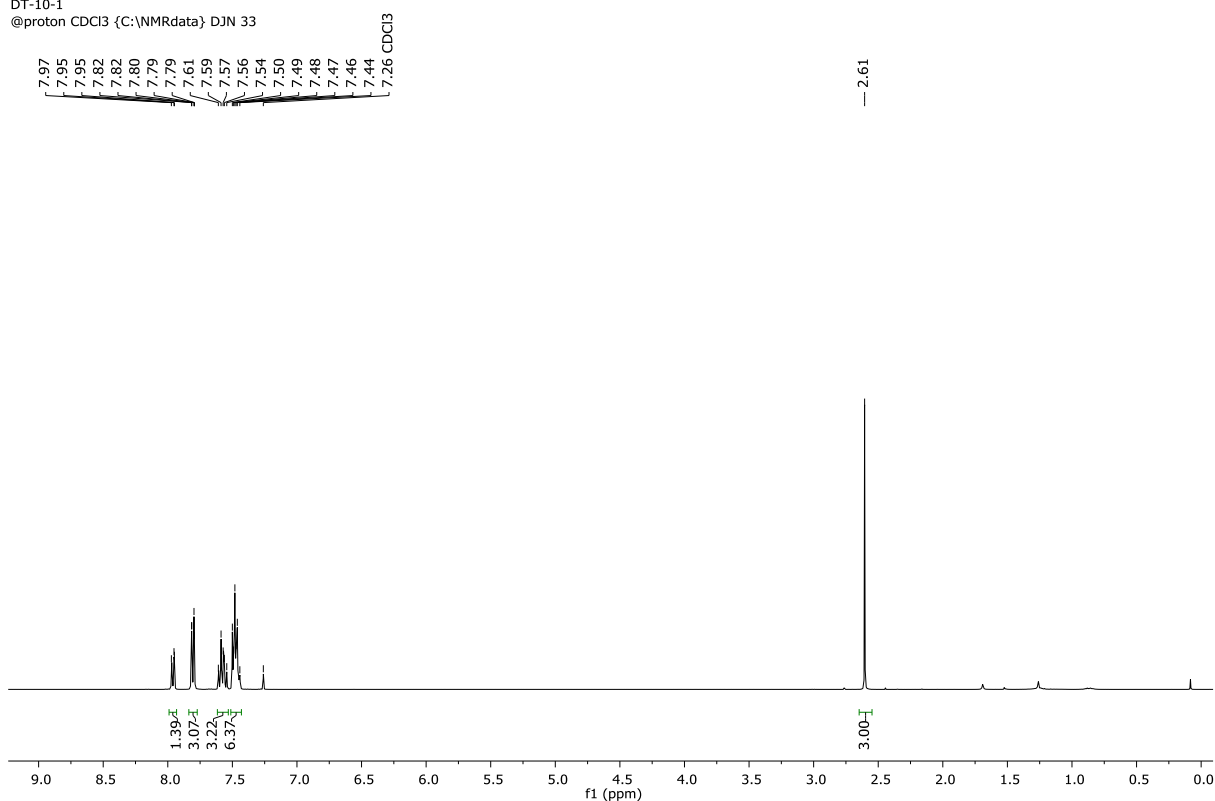

**Figure S26.**  $^1\text{H}$  NMR (400 MHz,  $\text{CDCl}_3$ ) of the competition experiment between acetophenone and benzophenone (entry 1, Table S4).

D318493  
 Person kpb19112  
 DT-10-2  
 @proton CDCl3 {C:\NMRdata} DJN 34

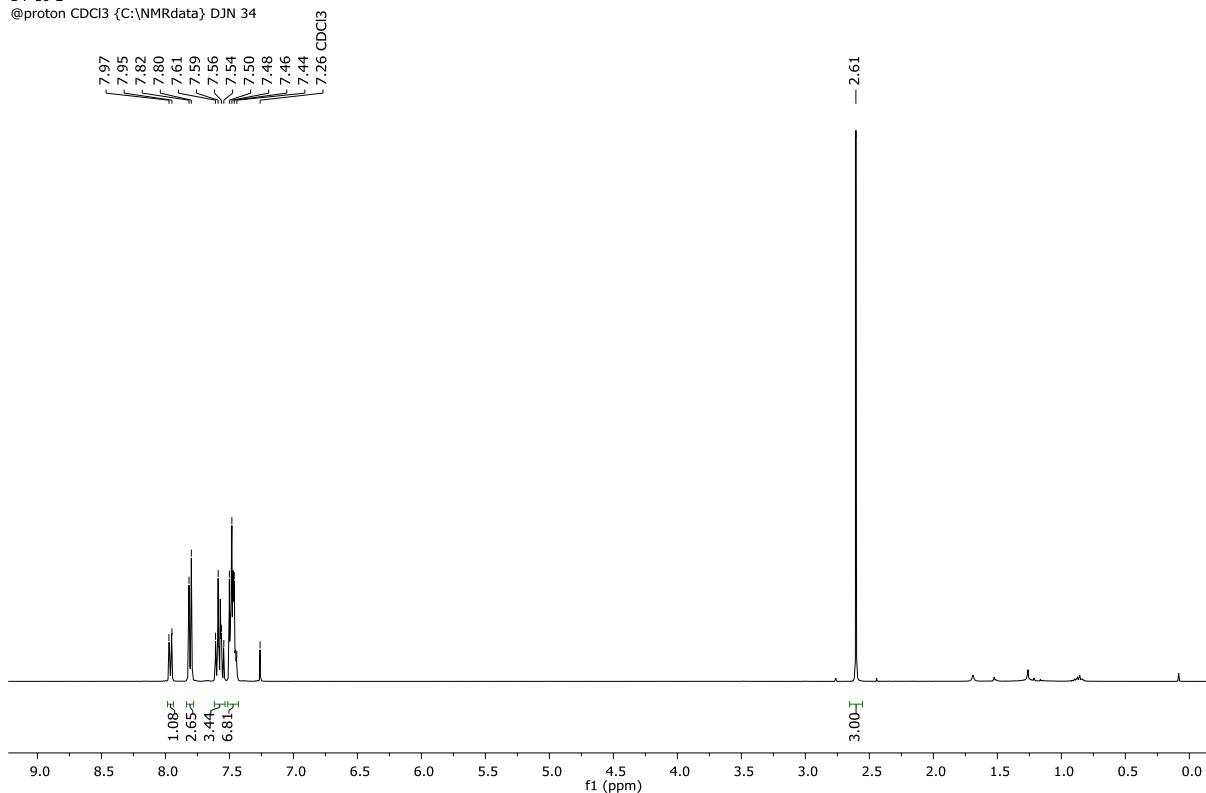

**Figure S27.**  $^1\text{H}$  NMR (400 MHz,  $\text{CDCl}_3$ ) of the competition experiment between acetophenone and benzophenone (entry 2, Table S4).

D318494  
 Person kpb19112  
 DT-10-3  
 @proton CDCl3 {C:\NMRdata} DJN 35

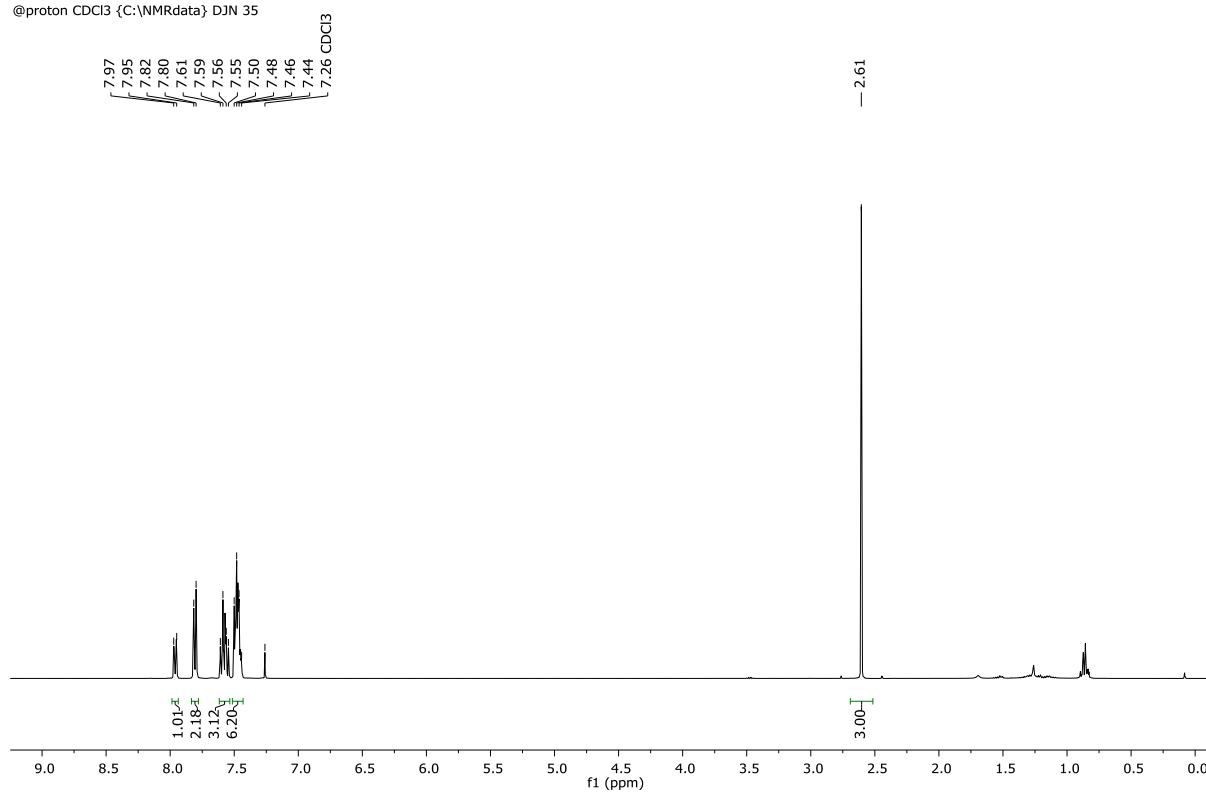

**Figure S28.** <sup>1</sup>H NMR (400 MHz, CDCl<sub>3</sub>) of the competition experiment between acetophenone and benzophenone (entry 3, Table S4).

**Table S5.** Determination of the competition rate constant  $\kappa$  from the labelling experiment between benzamide and acetophenone

|                                                                                                                                                                                                                                         | Substrate <b>R1</b>                                                               | Substrate <b>R2</b>                                                               | Catalyst                                                             |                              |                              |                  |          |
|-----------------------------------------------------------------------------------------------------------------------------------------------------------------------------------------------------------------------------------------|-----------------------------------------------------------------------------------|-----------------------------------------------------------------------------------|----------------------------------------------------------------------|------------------------------|------------------------------|------------------|----------|
|                                                                                                                                                                                                                                         | 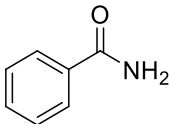 |  | <b>Ir-1</b><br>[(COD)Ir(IMes)PPh <sub>3</sub> ][BArF <sub>24</sub> ] |                              |                              |                  |          |
| Mass                                                                                                                                                                                                                                    | 12.1 mg                                                                           | 12.0 mg                                                                           | 8.7 mg                                                               |                              |                              |                  |          |
| Deuteration expected at $\delta$ ( <b>R1</b> ) = 7.86 – 7.77 ppm and at $\delta$ ( <b>R2</b> ) = 7.99 – 7.93ppm                                                                                                                         |                                                                                   |                                                                                   |                                                                      |                              |                              |                  |          |
| Determined against integral at $\delta$ ( <b>R1</b> ) = 7.59 – 7.39 ppm and at $\delta$ ( <b>R2</b> ) = 2.60 ppm                                                                                                                        |                                                                                   |                                                                                   |                                                                      |                              |                              |                  |          |
| <i>Spectral details of the deuterated reaction mixture:</i>                                                                                                                                                                             |                                                                                   |                                                                                   |                                                                      |                              |                              |                  |          |
| <sup>1</sup> H NMR (400 MHz, CDCl <sub>3</sub> ) $\delta$ = 7.99 – 7.93 (m, 2H/D <b>R2</b> ), 7.86 – 7.77 (m, 2H/D <b>R1</b> ), 7.59 – 7.39 (m, 3H, <b>R1</b> and 3H, <b>R2</b> ), 6.19 (br, 2H, <b>R1</b> ), 2.60 (s, 3H, <b>R2</b> ). |                                                                                   |                                                                                   |                                                                      |                              |                              |                  |          |
| Entry                                                                                                                                                                                                                                   | I <sub>R1(t)</sub><br>N = 2H                                                      | I <sub>R1(0)</sub><br>N = 3H                                                      | %D <sub>R1</sub>                                                     | I <sub>R2(t)</sub><br>N = 2H | I <sub>R2(0)</sub><br>N = 3H | %D <sub>R2</sub> | $\kappa$ |
| <b>1</b>                                                                                                                                                                                                                                | 2.09                                                                              | 3.78 <sup>a</sup>                                                                 | 17                                                                   | 1.94                         | 3.00                         | 3                | 6.14     |
| <b>2</b>                                                                                                                                                                                                                                | 1.57                                                                              | 3.84 <sup>b</sup>                                                                 | 39                                                                   | 1.85                         | 3.00                         | 8                | 6.27     |
| <b>3</b>                                                                                                                                                                                                                                | 1.65                                                                              | 3.93 <sup>c</sup>                                                                 | 37                                                                   | 1.86                         | 3.00                         | 7                | 6.37     |
| <b>Average <math>\kappa</math> = 6.26</b>                                                                                                                                                                                               |                                                                                   |                                                                                   |                                                                      |                              |                              |                  |          |
| <sup>a</sup> I <sub>R1(0)</sub> = 6.78 – 3.00; <sup>b</sup> I <sub>R1(0)</sub> = 6.84 – 3.00; <sup>c</sup> I <sub>R1(0)</sub> = 6.93 – 3.00;                                                                                            |                                                                                   |                                                                                   |                                                                      |                              |                              |                  |          |

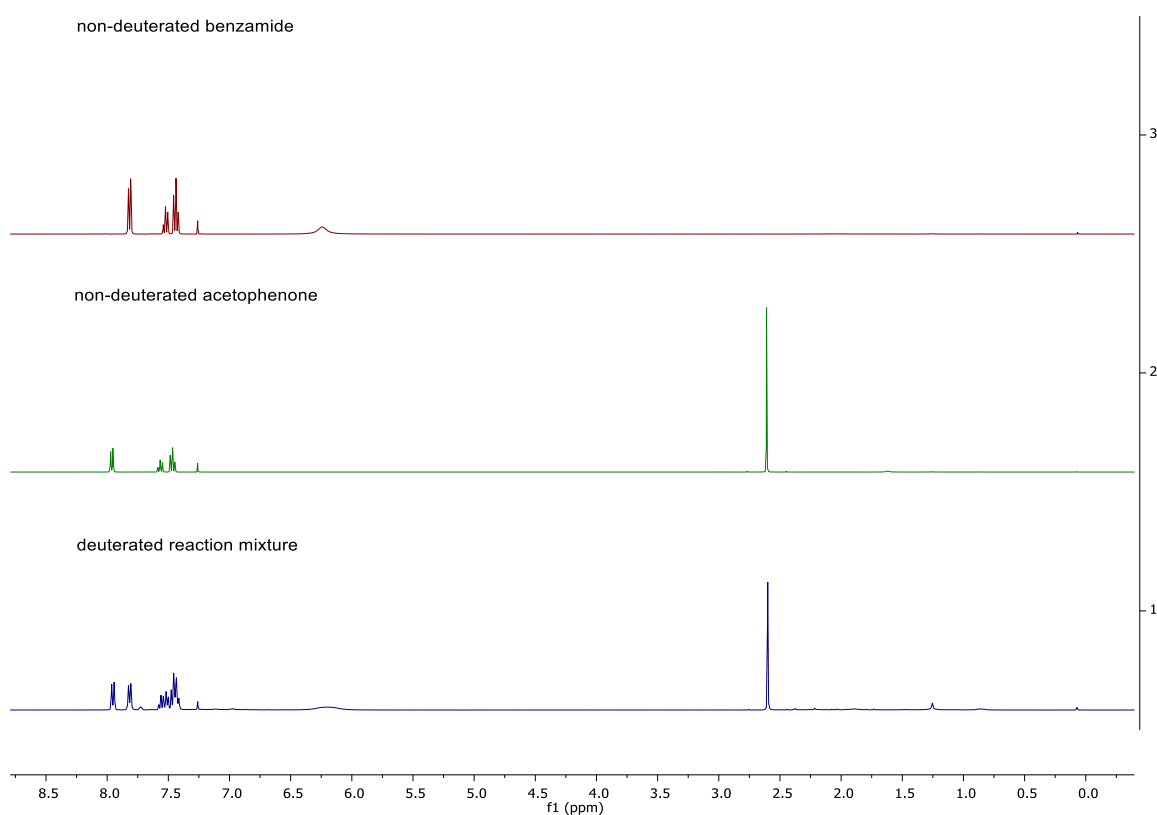

**Figure S29.** Stacked <sup>1</sup>H NMR (400 MHz, CDCl<sub>3</sub>) of non-deuterated substrates and reaction mixture.



D318834  
 Person kpb19112  
 DT-14-1  
 @proton CDCl3 {C:\NMRdata} DJN 23

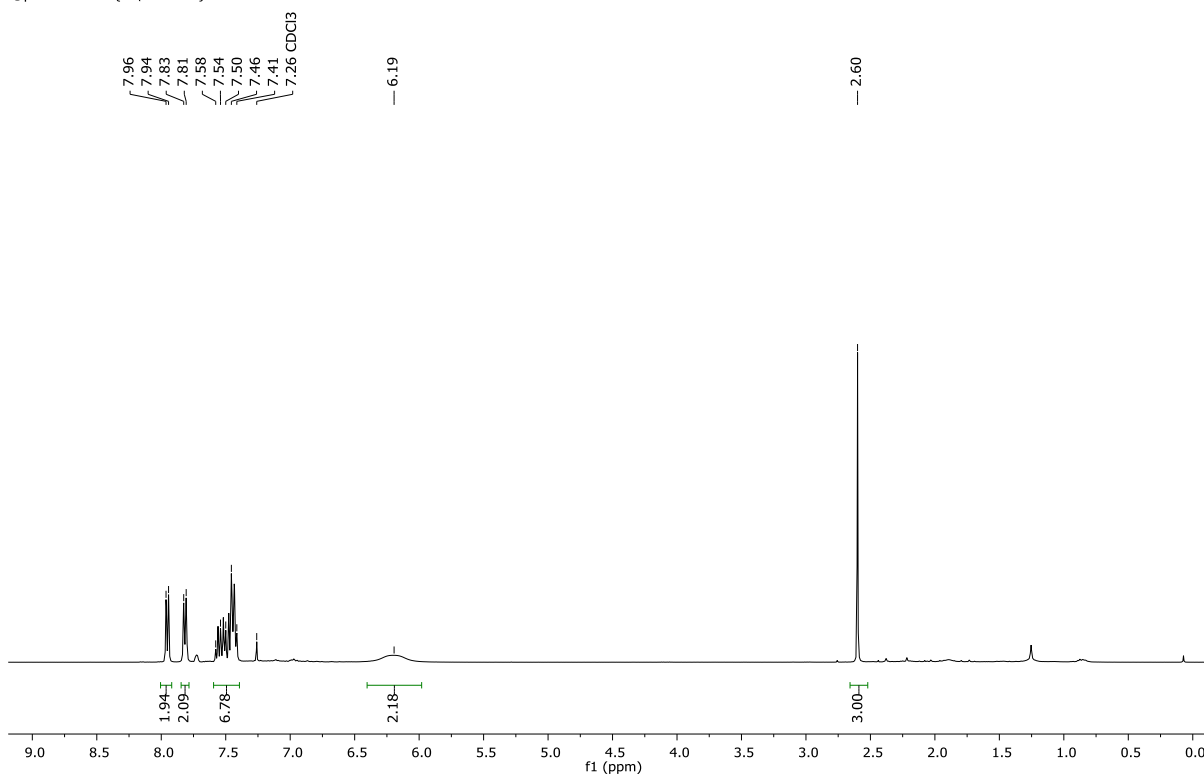

**Figure S30.** <sup>1</sup>H NMR (400 MHz, CDCl<sub>3</sub>) of the competition experiment between acetophenone and benzamide (entry 1, Table S5)

D323104  
 Person kpb19112  
 DT-14-2  
 @proton CDCl3 {C:\NMRdata} DJN 10

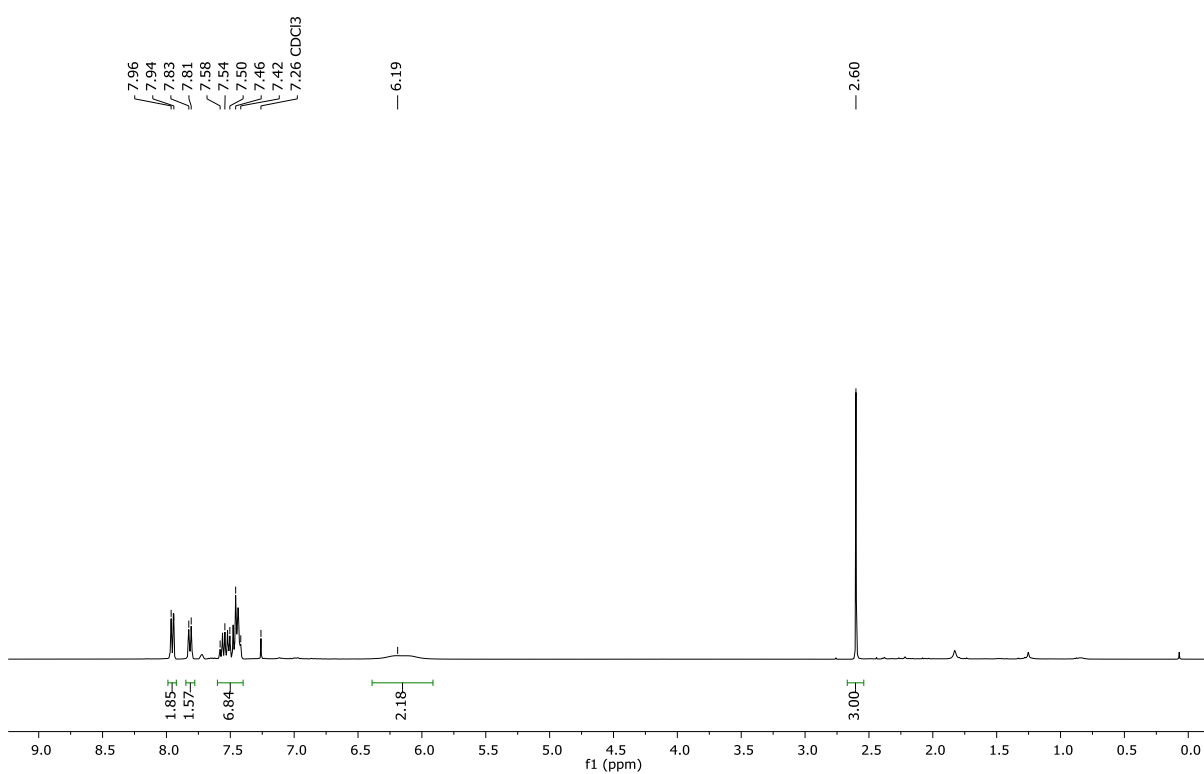

**Figure S31.** <sup>1</sup>H NMR (400 MHz, CDCl<sub>3</sub>) of the competition experiment between acetophenone and benzamide (entry 2, Table S5)

D323105  
Person kpb19112  
DT-14-3  
@proton CDCl3 {C:\NMRdata} DJN 11

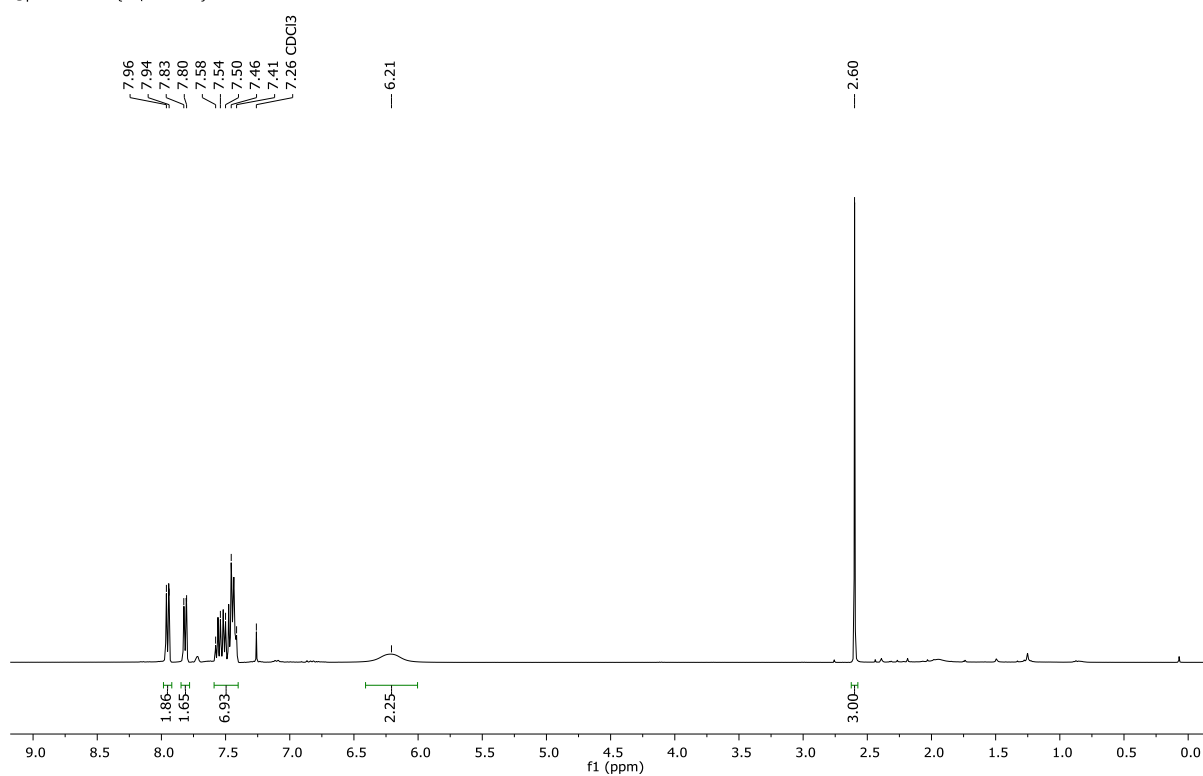

**Figure S32.** <sup>1</sup>H NMR (400 MHz, CDCl<sub>3</sub>) of the competition experiment between acetophenone and benzamide (entry 3, Table S5)

**Table S6.** Determination of the competition rate constant  $\kappa$  from the labelling experiment between acetophenone and *N,N*-dimethylbenzamide.

|                                                                                                                                                                                                                                                                                | Substrate <b>R1</b>                                                               | Substrate <b>R2</b>                                                               | Catalyst                                                             |                              |                              |                  |          |
|--------------------------------------------------------------------------------------------------------------------------------------------------------------------------------------------------------------------------------------------------------------------------------|-----------------------------------------------------------------------------------|-----------------------------------------------------------------------------------|----------------------------------------------------------------------|------------------------------|------------------------------|------------------|----------|
|                                                                                                                                                                                                                                                                                | 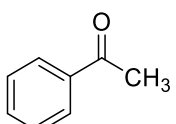 |  | <b>Ir-1</b><br>[(COD)Ir(IMes)PPh <sub>3</sub> ][BArF <sub>24</sub> ] |                              |                              |                  |          |
| <b>Mass</b>                                                                                                                                                                                                                                                                    | 12.0 mg                                                                           | 14.9 mg                                                                           | 8.7 mg                                                               |                              |                              |                  |          |
| Deuteration expected at $\delta$ ( <b>R1</b> ) = 7.99 – 7.93 ppm and at $\delta$ ( <b>R2</b> ) = 7.42 – 7.36 ppm                                                                                                                                                               |                                                                                   |                                                                                   |                                                                      |                              |                              |                  |          |
| Determined against integral at $\delta$ ( <b>R1</b> ) = 7.57 – 7.54 ppm and at $\delta$ ( <b>R2</b> ) = 3.17 – 2.88 ppm                                                                                                                                                        |                                                                                   |                                                                                   |                                                                      |                              |                              |                  |          |
| <i>Spectral details of the deuterated reaction mixture:</i>                                                                                                                                                                                                                    |                                                                                   |                                                                                   |                                                                      |                              |                              |                  |          |
| <sup>1</sup> H NMR (400 MHz, CDCl <sub>3</sub> ) $\delta$ = 7.99 – 7.93 (m, 2H/D <b>R1</b> ), 7.57 – 7.54 (m, 1H, <b>R1</b> ), 7.47 – 7.43 (m, 2H, <b>R1</b> ), 7.42 – 7.36 (m, 2H/D <b>R2</b> and 3H, <b>R2</b> ), 3.17 – 2.88 (m, 6H, <b>R2</b> ), 2.60 (s, 3H, <b>R1</b> ). |                                                                                   |                                                                                   |                                                                      |                              |                              |                  |          |
| Entry                                                                                                                                                                                                                                                                          | I <sub>R1(t)</sub><br>N = 2H                                                      | I <sub>R1(0)</sub><br>N = 3H                                                      | %D <sub>R1</sub>                                                     | I <sub>R2(t)</sub><br>N = 2H | I <sub>R2(0)</sub><br>N = 6H | %D <sub>R2</sub> | $\kappa$ |
| <b>1</b>                                                                                                                                                                                                                                                                       | 1.50                                                                              | 3.00                                                                              | 25                                                                   | 1.62 <sup>a</sup>            | 5.32                         | 9                | 3.18     |
| <b>2</b>                                                                                                                                                                                                                                                                       | 1.54                                                                              | 3.00                                                                              | 23                                                                   | 1.96 <sup>b</sup>            | 6.29                         | 7                | 3.74     |
| <b>3</b>                                                                                                                                                                                                                                                                       | 1.45                                                                              | 3.00                                                                              | 28                                                                   | 2.06 <sup>c</sup>            | 6.59                         | 6                | 4.82     |
| <b>Average <math>\kappa</math> = 3.91</b>                                                                                                                                                                                                                                      |                                                                                   |                                                                                   |                                                                      |                              |                              |                  |          |
| <sup>a</sup> I <sub>R2(t)</sub> = 4.28 – (5.32)/6×3; <sup>b</sup> I <sub>R2(t)</sub> = 5.10 – (6.29)/6×3; <sup>c</sup> I <sub>R2(t)</sub> = 5.35 – (6.59)/6×3                                                                                                                  |                                                                                   |                                                                                   |                                                                      |                              |                              |                  |          |

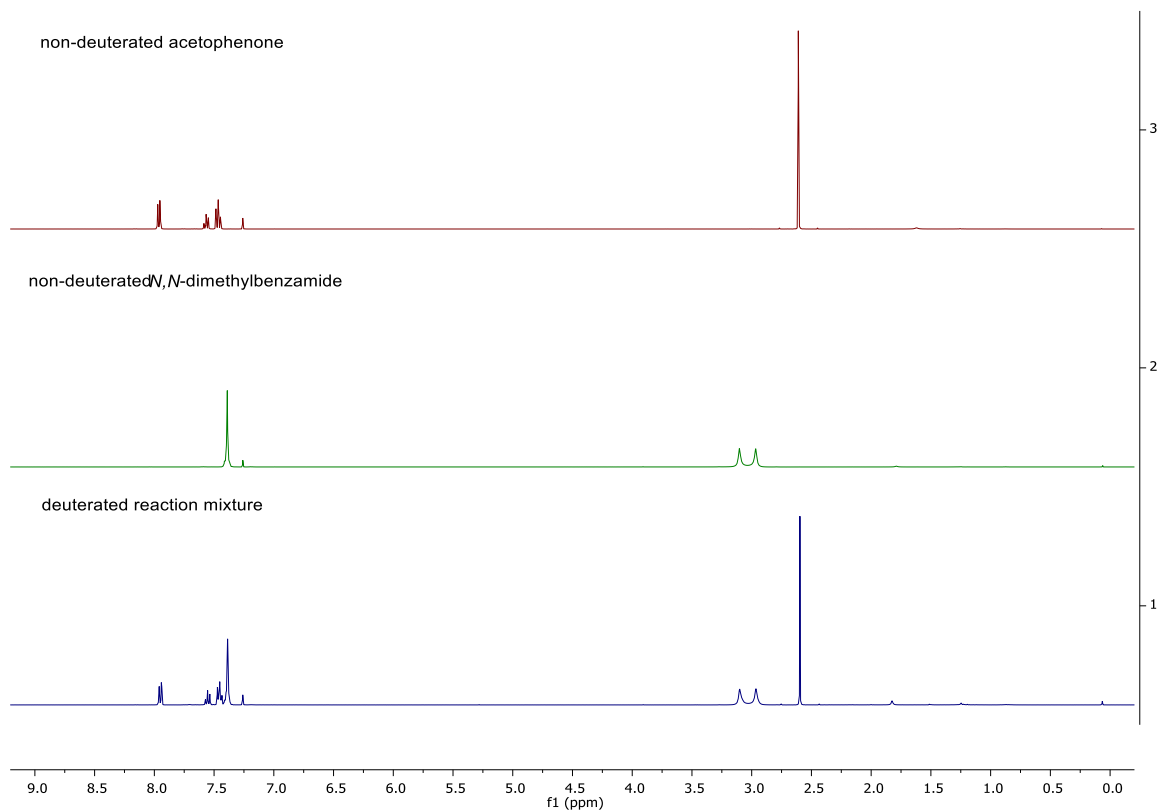

**Figure S33.** Stacked <sup>1</sup>H NMR (400 MHz, CDCl<sub>3</sub>) of non-deuterated substrates and reaction mixture.

B57030  
 Person kpb19112  
 DT-16-1  
 @proton16 CDCl<sub>3</sub> {C:\NMRdata} DJN 25

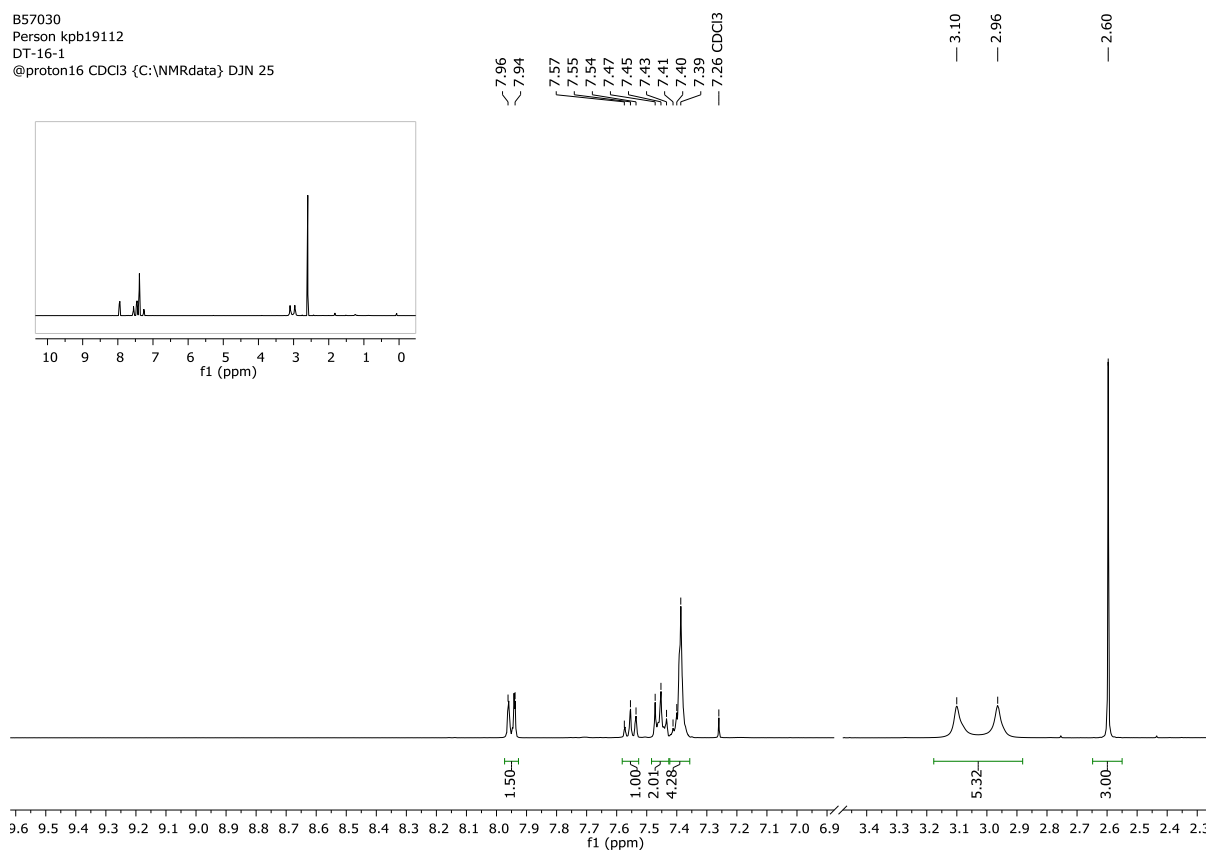

**Figure S34.** <sup>1</sup>H NMR (400 MHz, CDCl<sub>3</sub>) of the competition experiment between acetophenone and *N,N*-dimethylbenzamide (entry 1, Table S6).

D323115  
 Person kpb19112  
 DT-16-3  
 @proton CDCl<sub>3</sub> {C:\NMRdata} DJN 20

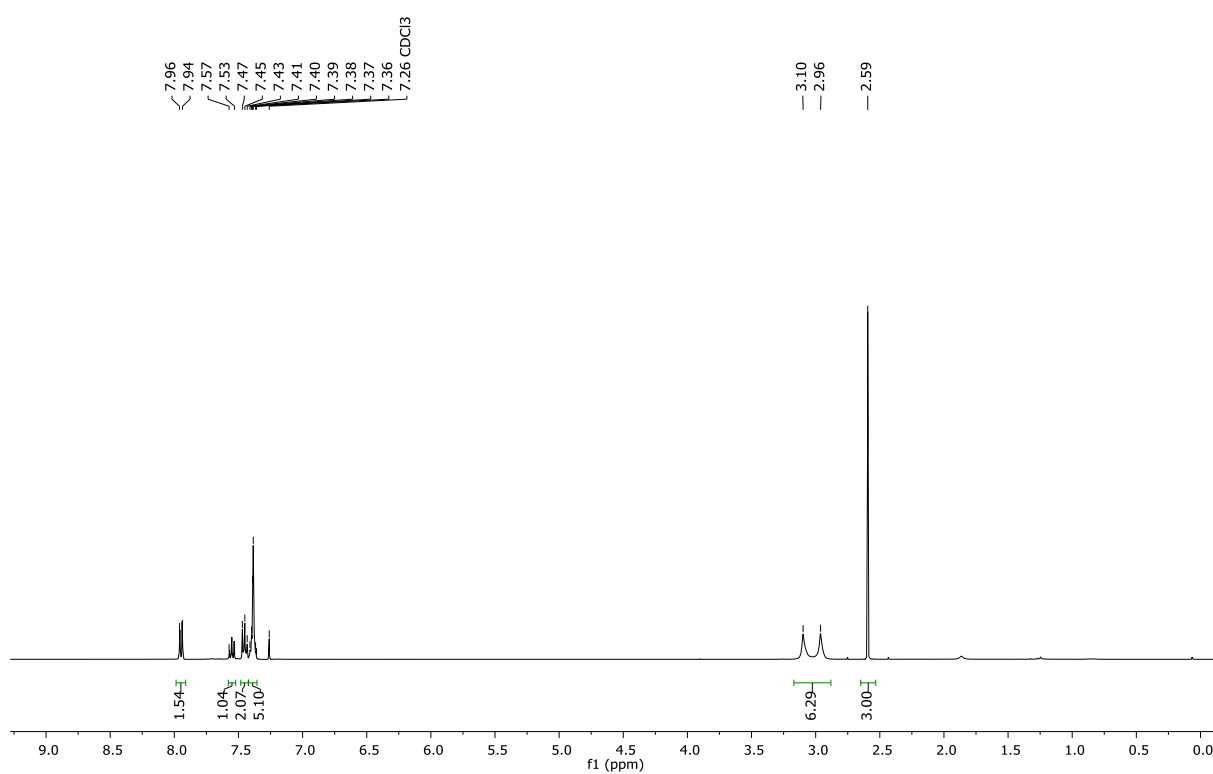

**Figure S35.** <sup>1</sup>H NMR (400 MHz, CDCl<sub>3</sub>) of the competition experiment between acetophenone and *N,N*-dimethylbenzamide (entry 2, Table S6).

D324151  
Person kpb19112  
DT-16-5  
@proton CDCl3 {C:\NMRdata} DJN 41

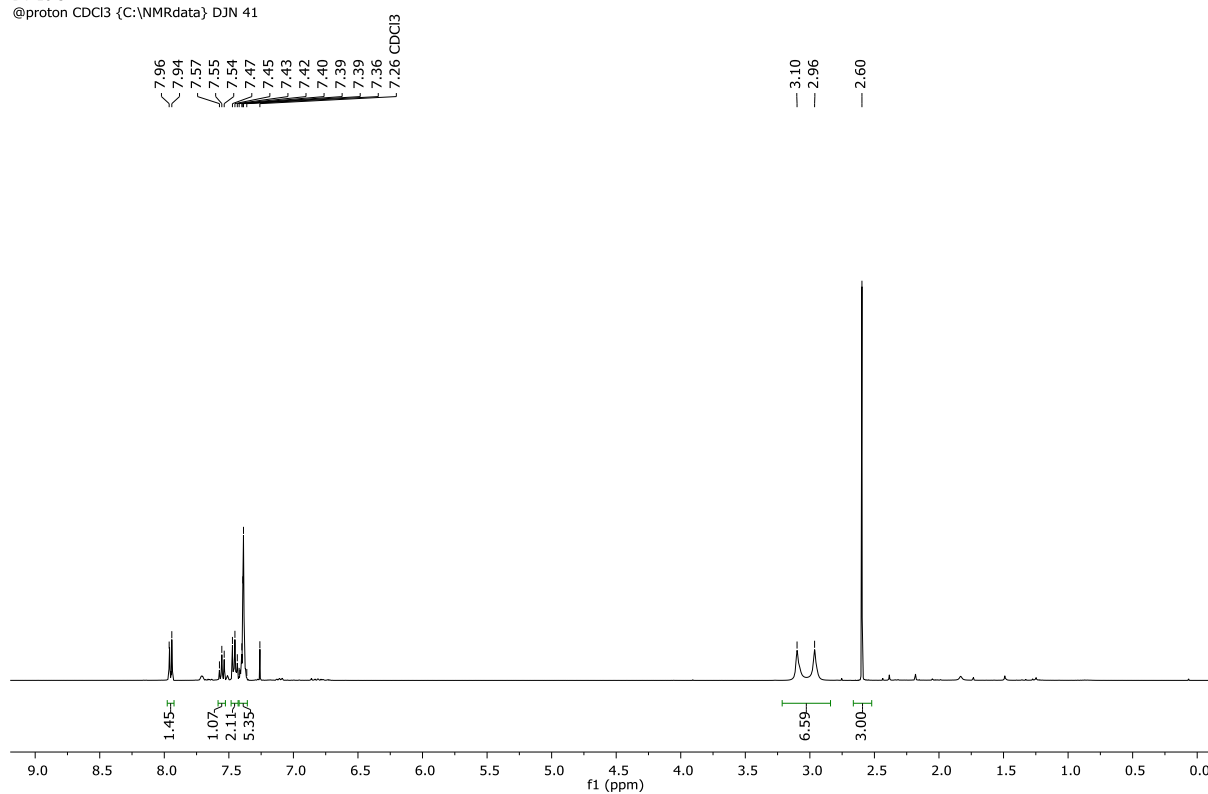

**Figure S36.** <sup>1</sup>H NMR (400 MHz, CDCl<sub>3</sub>) of the competition experiment between acetophenone and *N,N*-dimethylbenzamide (entry 3, Table S6).

**Table S7.** Determination of the competition rate constant  $\kappa$  from the labelling experiment between acetophenone and nitrobenzene.

|                                                                                                                                                                                                                                                                                      | Substrate <b>R1</b>                                                               | Substrate <b>R2</b>                                                               | Catalyst                                                             |                              |                              |                  |          |
|--------------------------------------------------------------------------------------------------------------------------------------------------------------------------------------------------------------------------------------------------------------------------------------|-----------------------------------------------------------------------------------|-----------------------------------------------------------------------------------|----------------------------------------------------------------------|------------------------------|------------------------------|------------------|----------|
|                                                                                                                                                                                                                                                                                      | 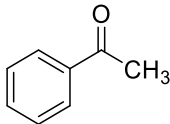 |  | <b>Ir-1</b><br>[(COD)Ir(IMes)PPh <sub>3</sub> ][BArF <sub>24</sub> ] |                              |                              |                  |          |
| <b>Mass</b>                                                                                                                                                                                                                                                                          | 12.0 mg                                                                           | 12.3 mg                                                                           | 8.7 mg                                                               |                              |                              |                  |          |
| Deuteration expected at $\delta$ ( <b>R1</b> ) = 7.99 – 7.93 ppm and at $\delta$ ( <b>R2</b> ) = 8.26 – 8.20 ppm                                                                                                                                                                     |                                                                                   |                                                                                   |                                                                      |                              |                              |                  |          |
| Determined against integral at $\delta$ ( <b>R1</b> ) = 2.61 ppm and at $\delta$ ( <b>R2</b> ) = 7.49 – 7.43 ppm                                                                                                                                                                     |                                                                                   |                                                                                   |                                                                      |                              |                              |                  |          |
| <i>Spectral details of the deuterated reaction mixture:</i>                                                                                                                                                                                                                          |                                                                                   |                                                                                   |                                                                      |                              |                              |                  |          |
| <sup>1</sup> H NMR (400 MHz, CDCl <sub>3</sub> ) $\delta$ = 8.26 – 8.20 (m, 2H/D <b>R2</b> ), 7.99 – 7.93 (m, 2H/D <b>R1</b> ), 7.73 – 7.66 (m, 1H, <b>R2</b> ), 7.59 – 7.51 (m, 1H, <b>R1</b> and 2H, <b>R2</b> ), 7.49 – 7.43 (m, 2H, <b>R1</b> ), 2.61 (s, 3H, CH <sub>3</sub> ). |                                                                                   |                                                                                   |                                                                      |                              |                              |                  |          |
| Entry                                                                                                                                                                                                                                                                                | I <sub>R1(t)</sub><br>N = 2H                                                      | I <sub>R1(0)</sub><br>N = 3H                                                      | %D <sub>R1</sub>                                                     | I <sub>R2(t)</sub><br>N = 2H | I <sub>R2(0)</sub><br>N = 1H | %D <sub>R2</sub> | $\kappa$ |
| <b>1</b>                                                                                                                                                                                                                                                                             | 0.66                                                                              | 3.22                                                                              | 69                                                                   | 1.43                         | 1.00                         | 29               | 3.52     |
| <b>2</b>                                                                                                                                                                                                                                                                             | 0.59                                                                              | 2.58                                                                              | 66                                                                   | 1.43                         | 1.00                         | 29               | 3.19     |
| <b>3</b>                                                                                                                                                                                                                                                                             | 0.81                                                                              | 2.81                                                                              | 57                                                                   | 1.57                         | 1.00                         | 22               | 3.46     |
| <b>Average <math>\kappa</math> = 3.39</b>                                                                                                                                                                                                                                            |                                                                                   |                                                                                   |                                                                      |                              |                              |                  |          |

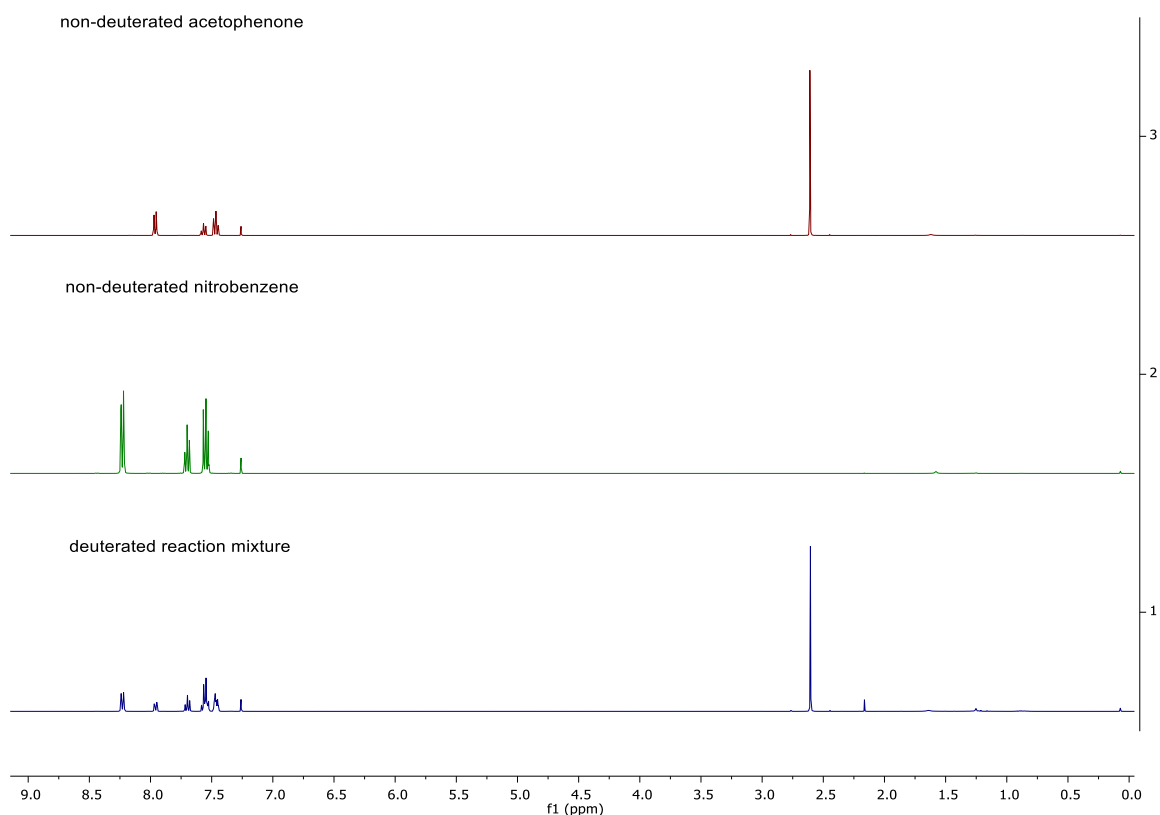

**Figure S37.** Stacked <sup>1</sup>H NMR (400 MHz, CDCl<sub>3</sub>) of non-deuterated substrates and reaction mixture.

D326180  
 Person kpb19112  
 DT-12-3A  
 @proton CDCl3 {C:\NMRdata} DJN 23

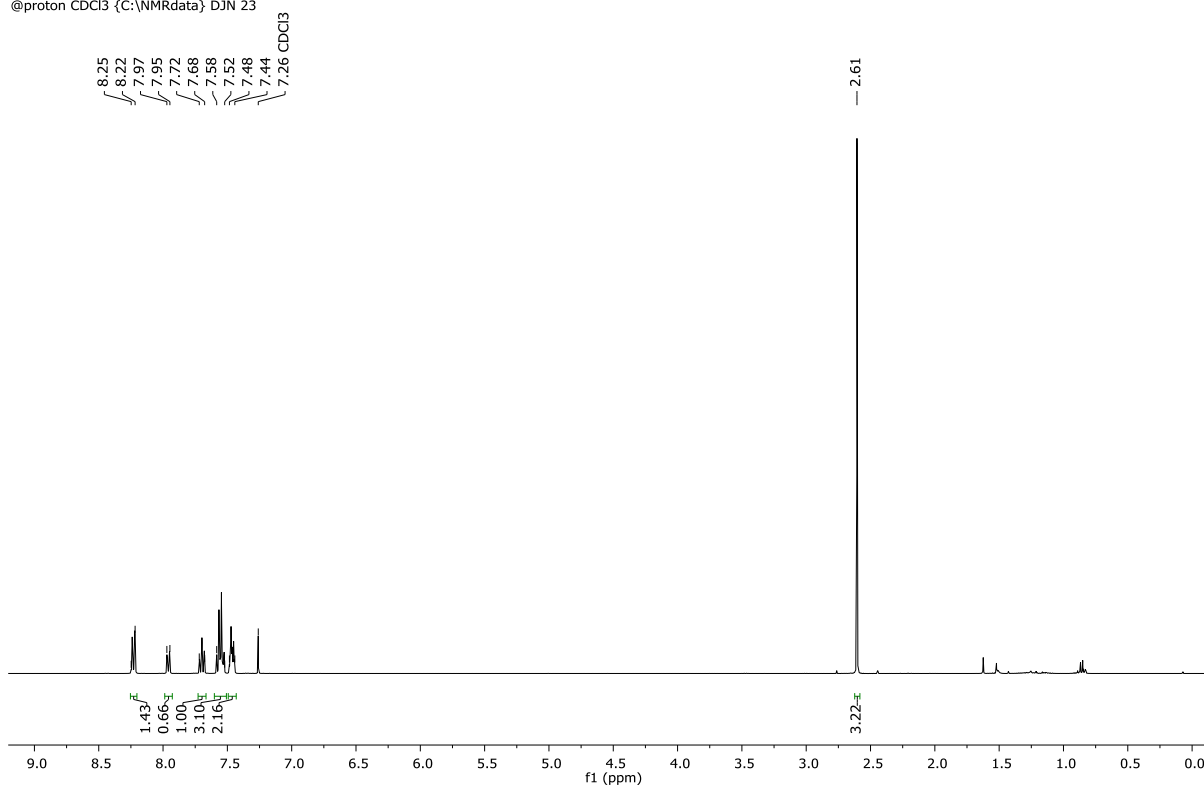

**Figure S38.**  $^1\text{H}$  NMR (400 MHz,  $\text{CDCl}_3$ ) of the competition experiment between acetophenone and nitrobenzene (entry 1, Table S7).

D321014  
 Person kpb19112  
 DT-12-4  
 @proton CDCl3 {C:\NMRdata} DJN 25

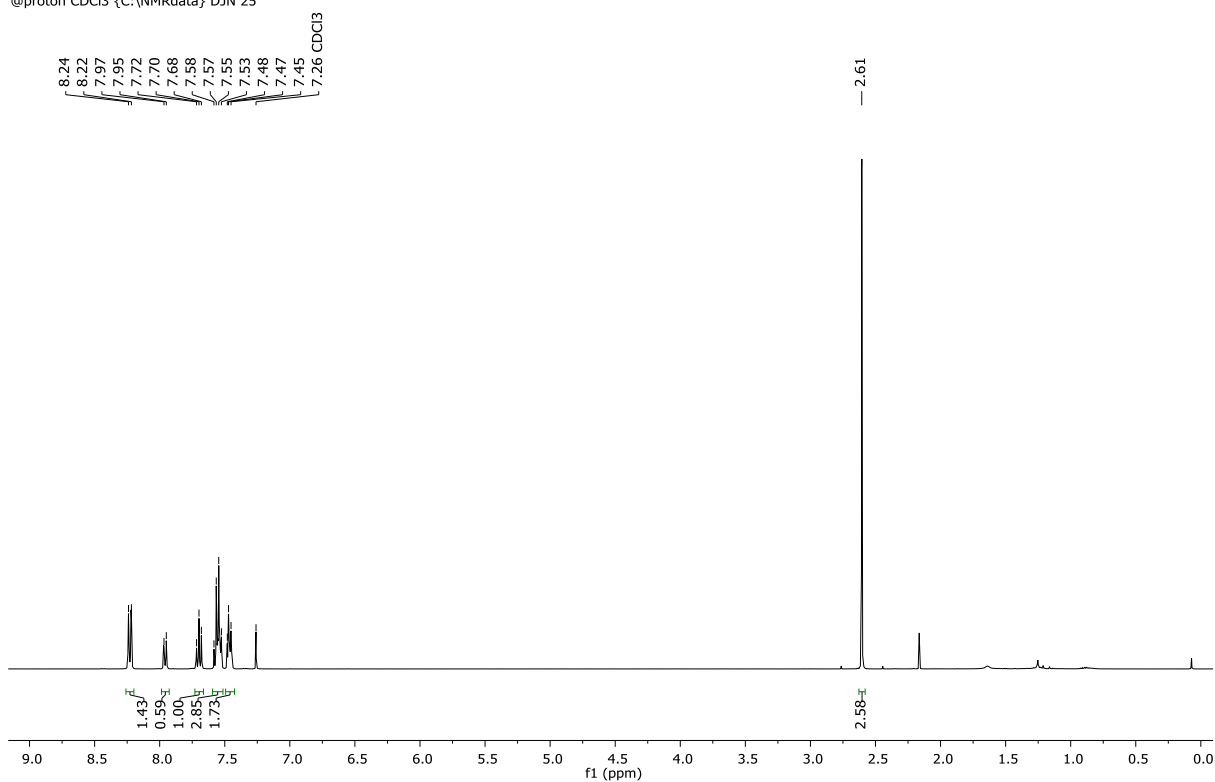

**Figure S39.**  $^1\text{H}$  NMR (400 MHz,  $\text{CDCl}_3$ ) of the competition experiment between acetophenone and nitrobenzene (entry 2, Table S7).

D321015  
Person kpb19112  
DT-12-5  
@proton CDCl3 {C:\NMRdata} DJN 26

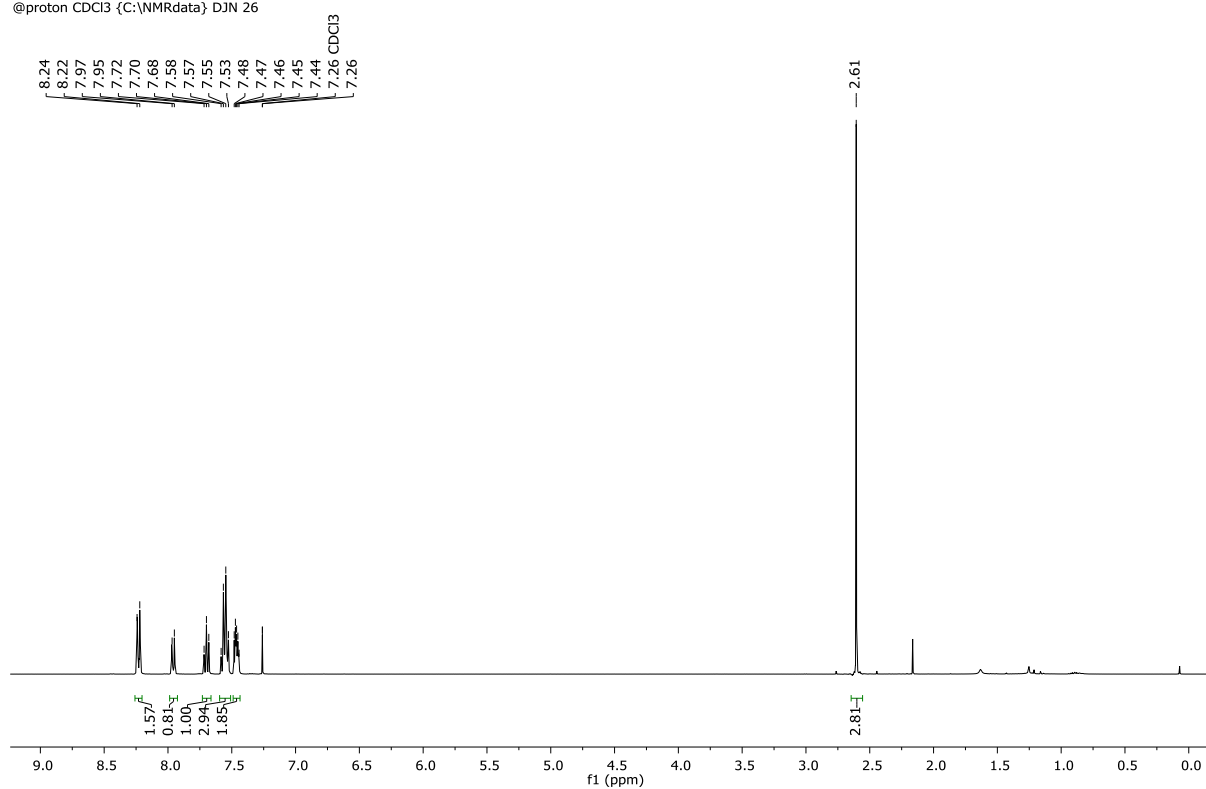

**Figure S40.**  $^1\text{H}$  NMR (400 MHz,  $\text{CDCl}_3$ ) of the competition experiment between acetophenone and nitrobenzene (entry 3, Table S7).



**Table S8.** Determination of the competition rate constant  $\kappa$  from the labelling experiment between nitrobenzene and ethyl benzoate.

|                                                                                                                                                                                                                                                                                                                                                      | Substrate <b>R1</b>                                                               | Substrate <b>R2</b>                                                               | Catalyst                                                             |                              |                              |                  |          |
|------------------------------------------------------------------------------------------------------------------------------------------------------------------------------------------------------------------------------------------------------------------------------------------------------------------------------------------------------|-----------------------------------------------------------------------------------|-----------------------------------------------------------------------------------|----------------------------------------------------------------------|------------------------------|------------------------------|------------------|----------|
|                                                                                                                                                                                                                                                                                                                                                      | 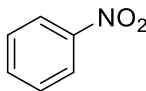 |  | <b>Ir-1</b><br>[(COD)Ir(IMes)PPh <sub>3</sub> ][BArF <sub>24</sub> ] |                              |                              |                  |          |
| Mass                                                                                                                                                                                                                                                                                                                                                 | 12.3 mg                                                                           | 15.0 mg                                                                           | 8.7 mg                                                               |                              |                              |                  |          |
| Deuteration expected at $\delta$ ( <b>R1</b> ) = 8.26 – 8.20 ppm and at $\delta$ ( <b>R2</b> ) = 8.08 – 8.02 ppm                                                                                                                                                                                                                                     |                                                                                   |                                                                                   |                                                                      |                              |                              |                  |          |
| Determined against integral at $\delta$ ( <b>R1</b> ) = 7.70 ppm and at $\delta$ ( <b>R2</b> ) = 4.38 ppm                                                                                                                                                                                                                                            |                                                                                   |                                                                                   |                                                                      |                              |                              |                  |          |
| <i>Spectral details of the deuterated reaction mixture:</i>                                                                                                                                                                                                                                                                                          |                                                                                   |                                                                                   |                                                                      |                              |                              |                  |          |
| <sup>1</sup> H NMR (400 MHz, CDCl <sub>3</sub> ) $\delta$ = 8.26 – 8.20 (m, 2H/D, <b>R1</b> ), 8.08 – 8.02 (m, 2H/D, <b>R2</b> ), 7.70 (t, $J$ = 7.4 Hz, 1H, <b>R1</b> ), 7.59 – 7.51 (m, 2H, <b>R1</b> and 1H, <b>R2</b> ), 7.43 (t, $J$ = 7.6 Hz, 2H, <b>R2</b> ), 4.38 (q, $J$ = 7.1 Hz, 2H, <b>R2</b> ), 1.39 (t, $J$ = 7.1 Hz, 3H, <b>R2</b> ). |                                                                                   |                                                                                   |                                                                      |                              |                              |                  |          |
| Entry                                                                                                                                                                                                                                                                                                                                                | I <sub>R1(t)</sub><br>N = 2H                                                      | I <sub>R1(0)</sub><br>N = 1H                                                      | %D <sub>R1</sub>                                                     | I <sub>R2(t)</sub><br>N = 2H | I <sub>R2(0)</sub><br>N = 2H | %D <sub>R2</sub> | $\kappa$ |
| <b>1</b>                                                                                                                                                                                                                                                                                                                                             | 0.88                                                                              | 1.00                                                                              | 56                                                                   | 1.83                         | 2.12                         | 14               | 5.58     |
| <b>2</b>                                                                                                                                                                                                                                                                                                                                             | 1.04                                                                              | 1.00                                                                              | 48                                                                   | 1.87                         | 2.06                         | 9                | 6.76     |
| <b>3</b>                                                                                                                                                                                                                                                                                                                                             | 0.76                                                                              | 1.00                                                                              | 62                                                                   | 1.74                         | 2.01                         | 13               | 6.71     |
| Average $\kappa$ = 6.35                                                                                                                                                                                                                                                                                                                              |                                                                                   |                                                                                   |                                                                      |                              |                              |                  |          |

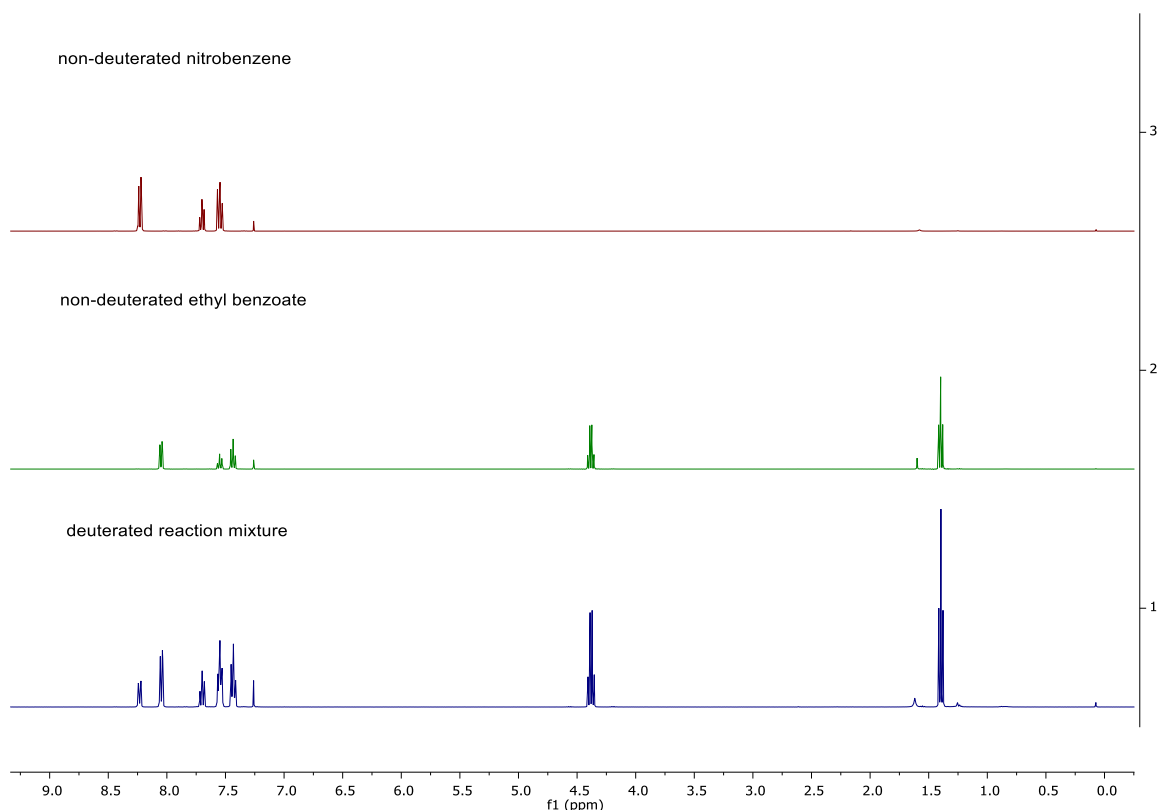

**Figure S41.** Stacked <sup>1</sup>H NMR (400 MHz, CDCl<sub>3</sub>) of non-deuterated substrates and reaction mixture.

B58490  
 Person kpb19112  
 DT-52-2  
 @proton16 CDCl3 {C:\NMRdata} DJN 8

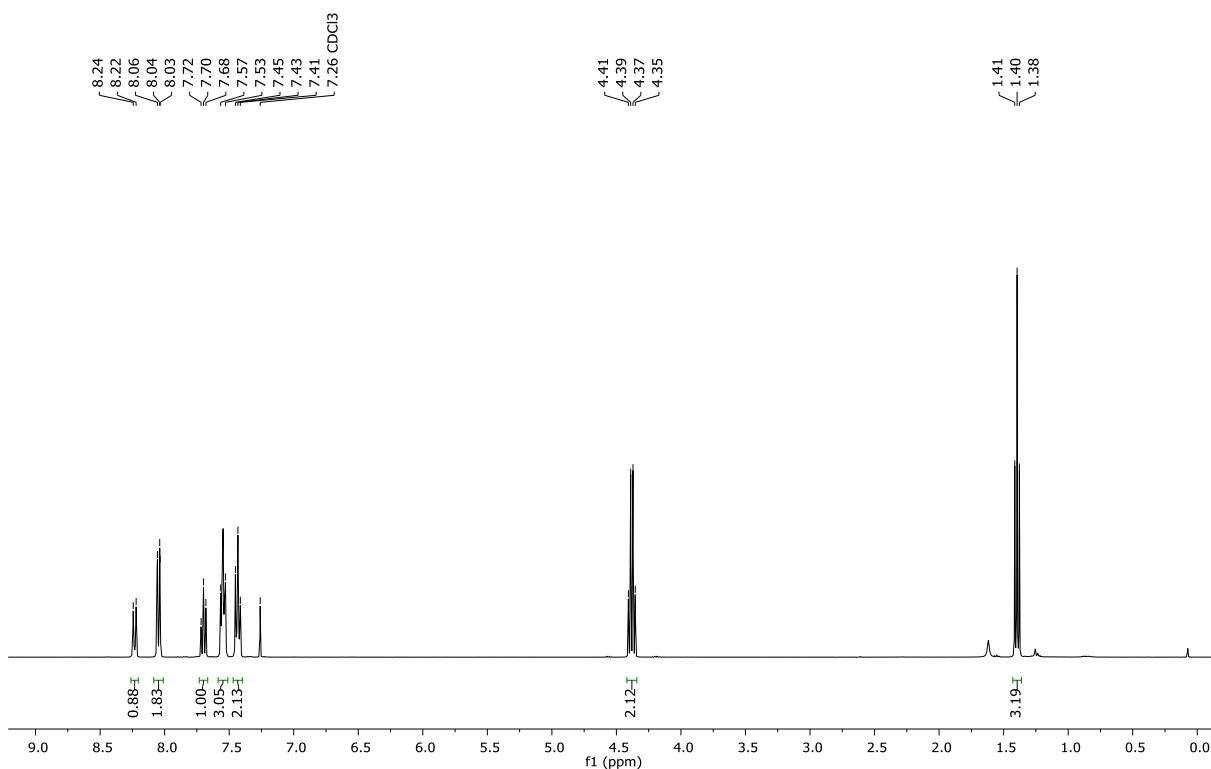

**Figure S42.** <sup>1</sup>H NMR (400 MHz, CDCl<sub>3</sub>) of the competition experiment between nitrobenzene and ethyl benzoate (entry 1, Table S8).

B58540  
 Person kpb19112  
 DT-52-3  
 @proton16 CDCl3 {C:\NMRdata} DJN 21

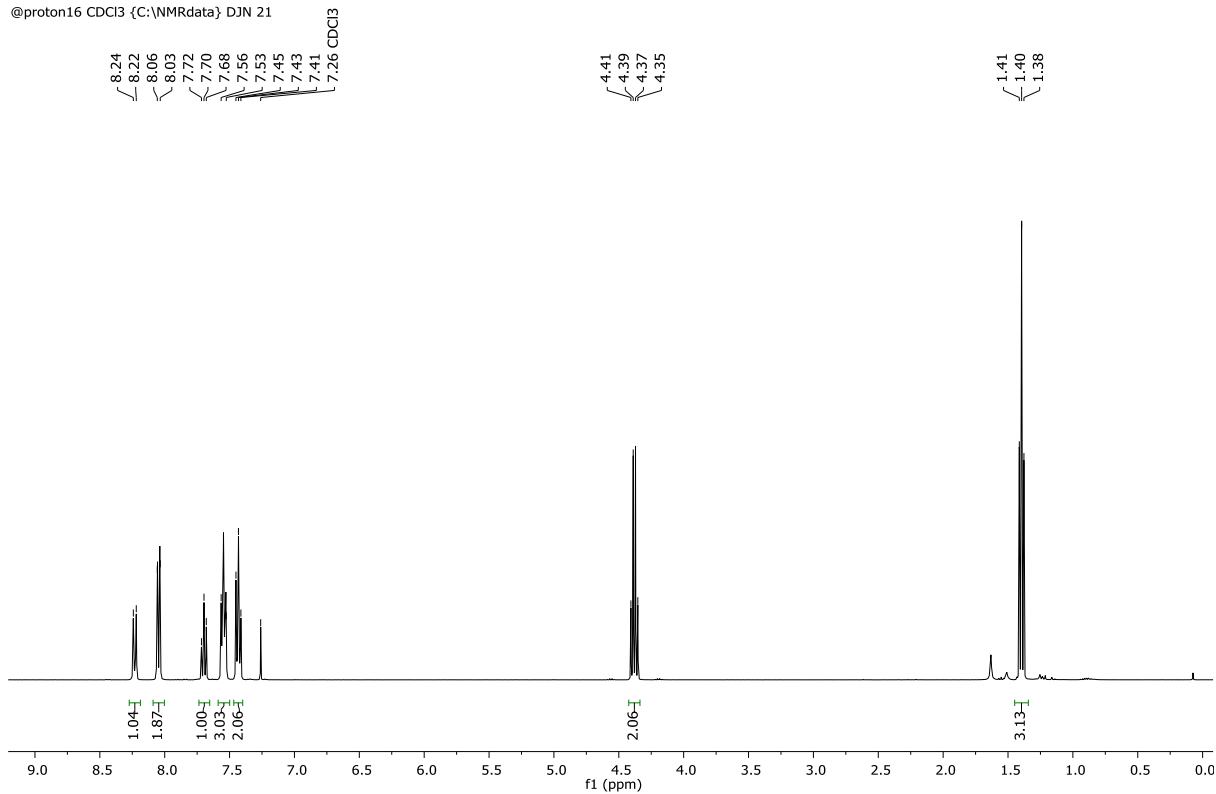

**Figure S43.** <sup>1</sup>H NMR (400 MHz, CDCl<sub>3</sub>) of the competition experiment between nitrobenzene and ethyl benzoate (entry 2, Table S8).

B58541  
Person kpb19112  
DT-52-4  
@proton16 CDCl3 {C:\NMRdata} DJN 22

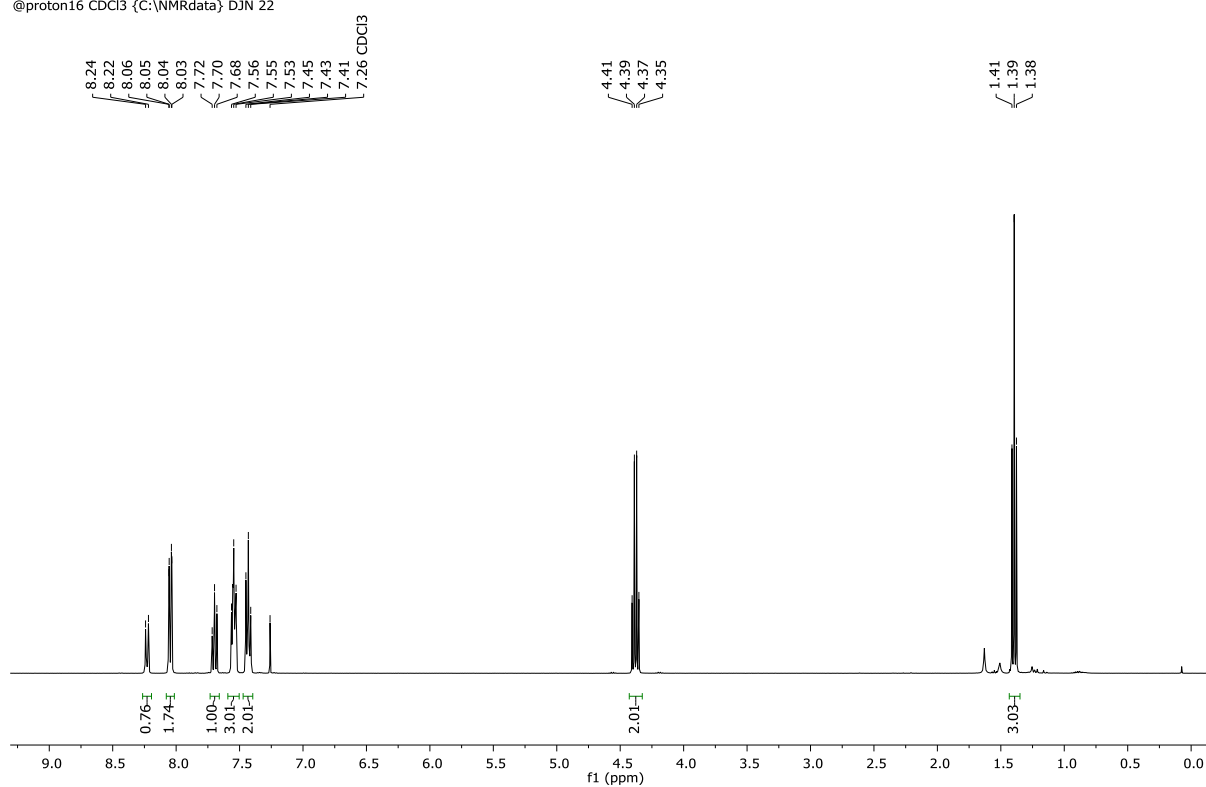

**Figure S44.** <sup>1</sup>H NMR (400 MHz, CDCl<sub>3</sub>) of the competition experiment between nitrobenzene and ethyl benzoate (entry 3, Table S8).

**Table S9.** Determination of the competition rate constant  $\kappa$  from the labelling experiment between acetophenone and ethyl benzoate.

|                                                                                                                                                                                                                                                                                                                                                  | Substrate <b>R1</b>                                                               | Substrate <b>R2</b>                                                               | Catalyst                                                             |                              |                              |                  |          |
|--------------------------------------------------------------------------------------------------------------------------------------------------------------------------------------------------------------------------------------------------------------------------------------------------------------------------------------------------|-----------------------------------------------------------------------------------|-----------------------------------------------------------------------------------|----------------------------------------------------------------------|------------------------------|------------------------------|------------------|----------|
|                                                                                                                                                                                                                                                                                                                                                  | 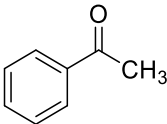 |  | <b>Ir-1</b><br>[(COD)Ir(IMes)PPh <sub>3</sub> ][BArF <sub>24</sub> ] |                              |                              |                  |          |
| Mass                                                                                                                                                                                                                                                                                                                                             | 12.0 mg                                                                           | 15.0 mg                                                                           | 8.7 mg                                                               |                              |                              |                  |          |
| Deuteration expected at $\delta$ ( <b>R1</b> ) = 7.99 – 7.93 ppm and at $\delta$ ( <b>R2</b> ) = 8.08 – 8.02 ppm                                                                                                                                                                                                                                 |                                                                                   |                                                                                   |                                                                      |                              |                              |                  |          |
| Determined against integral at $\delta$ ( <b>R1</b> ) = 2.61 ppm and at $\delta$ ( <b>R2</b> ) = 4.38 ppm                                                                                                                                                                                                                                        |                                                                                   |                                                                                   |                                                                      |                              |                              |                  |          |
| <i>Spectral details of the deuterated reaction mixture:</i>                                                                                                                                                                                                                                                                                      |                                                                                   |                                                                                   |                                                                      |                              |                              |                  |          |
| <sup>1</sup> H NMR (400 MHz, CDCl <sub>3</sub> ) $\delta$ = 8.08 – 8.02 (m, 2H/D, <b>R2</b> ), 7.99 – 7.93 (m, 2H/D <b>R1</b> ), 7.59 – 7.52 (m, 1H, <b>R1</b> and 1H, <b>R2</b> ), 7.49 – 7.40 (m, 2H, <b>R1</b> and 2H, <b>R2</b> ), 4.38 (q, $J$ = 7.1 Hz, 2H, <b>R2</b> ), 2.61 (s, 3H, <b>R1</b> ), 1.39 (t, $J$ = 7.1 Hz, 3H, <b>R2</b> ). |                                                                                   |                                                                                   |                                                                      |                              |                              |                  |          |
| Entry                                                                                                                                                                                                                                                                                                                                            | I <sub>R1(t)</sub><br>N = 2H                                                      | I <sub>R1(0)</sub><br>N = 3H                                                      | %D <sub>R1</sub>                                                     | I <sub>R2(t)</sub><br>N = 2H | I <sub>R2(0)</sub><br>N = 2H | %D <sub>R2</sub> | $\kappa$ |
| <b>1</b>                                                                                                                                                                                                                                                                                                                                         | 0.74                                                                              | 3.00                                                                              | 63                                                                   | 1.93                         | 2.14                         | 10               | 9.63     |
| <b>2</b>                                                                                                                                                                                                                                                                                                                                         | 0.59                                                                              | 3.00                                                                              | 71                                                                   | 2.37                         | 2.66                         | 11               | 10.58    |
| <b>3</b>                                                                                                                                                                                                                                                                                                                                         | 0.54                                                                              | 3.00                                                                              | 73                                                                   | 1.89                         | 2.13                         | 11               | 10.95    |
| Average $\kappa$ = 10.38                                                                                                                                                                                                                                                                                                                         |                                                                                   |                                                                                   |                                                                      |                              |                              |                  |          |

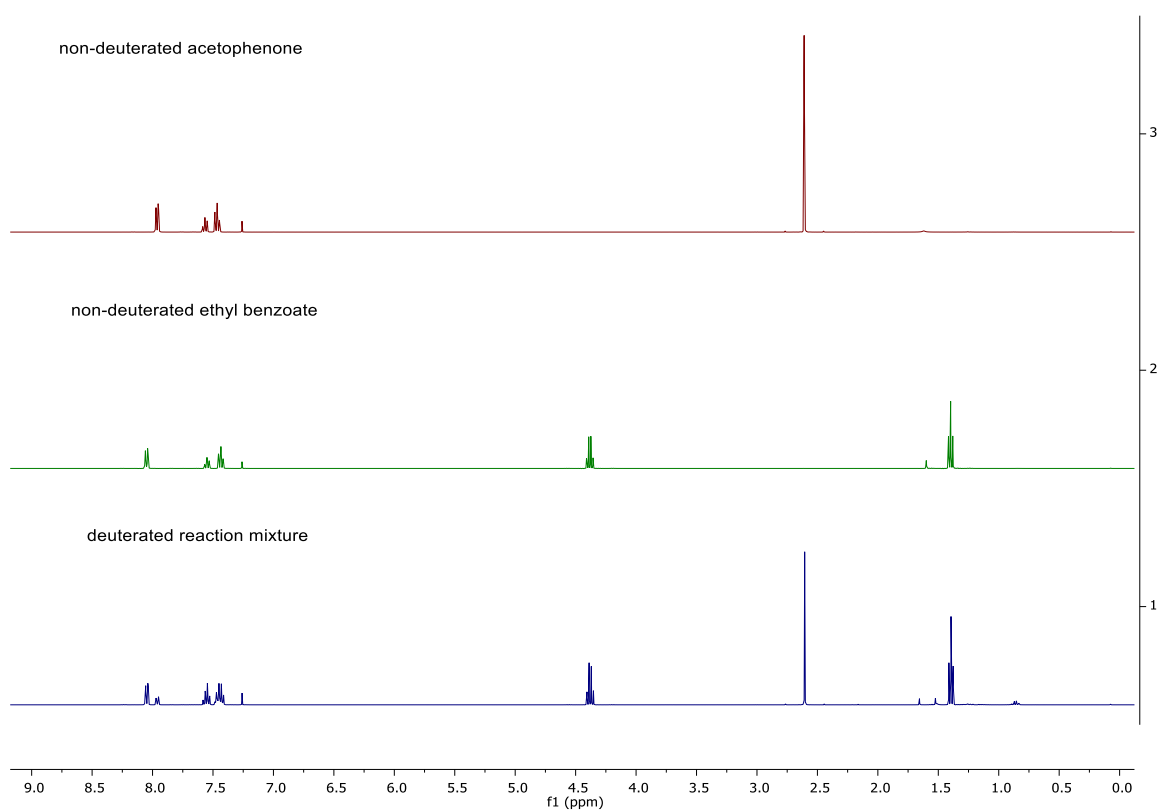

**Figure S45.** Stacked <sup>1</sup>H NMR (400 MHz, CDCl<sub>3</sub>) of non-deuterated substrates and reaction mixture.

D326188  
 Person kpb19112  
 DT-51-3  
 @proton CDCl3 {C:\NMRdata} DJN 31

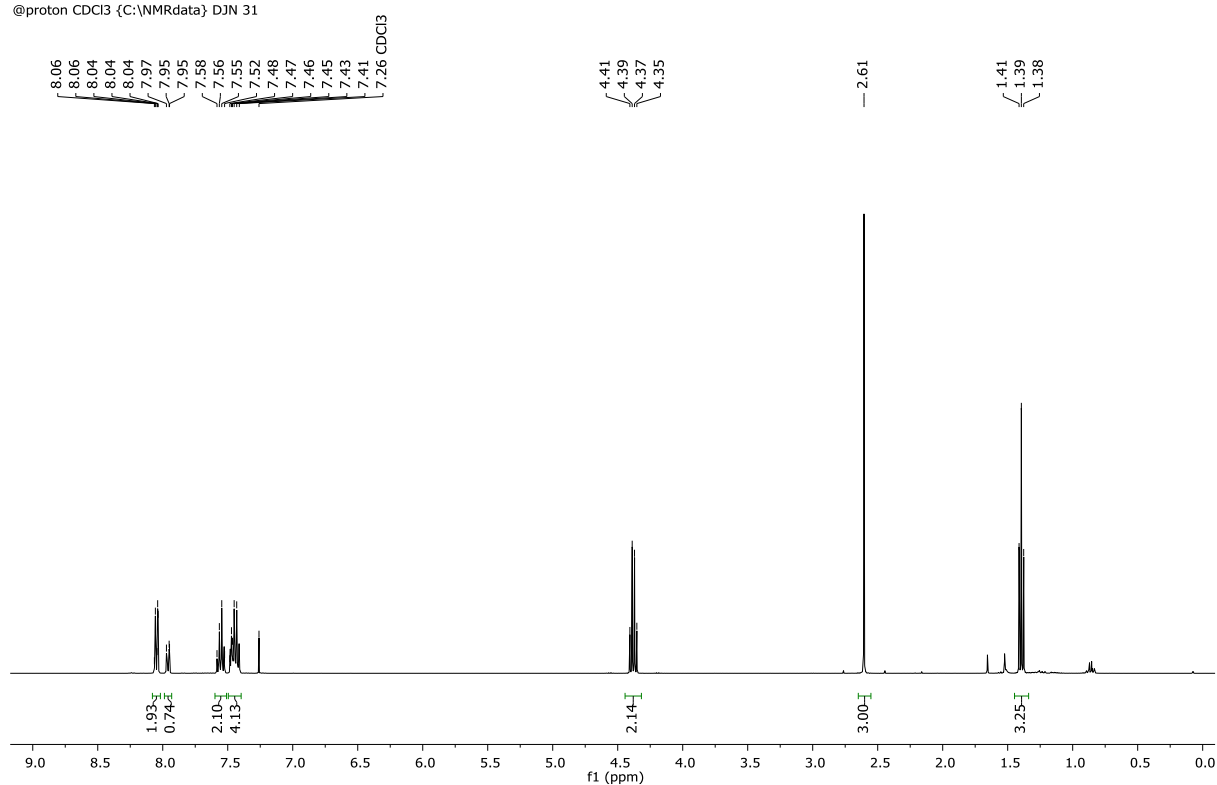

**Figure S46.**  $^1\text{H}$  NMR (400 MHz,  $\text{CDCl}_3$ ) of the competition experiment between acetophenone and ethyl benzoate (entry 1, Table S9).

B58533  
 Person kpb19112  
 DT-51-4  
 @proton16 CDCl3 {C:\NMRdata} DJN 5

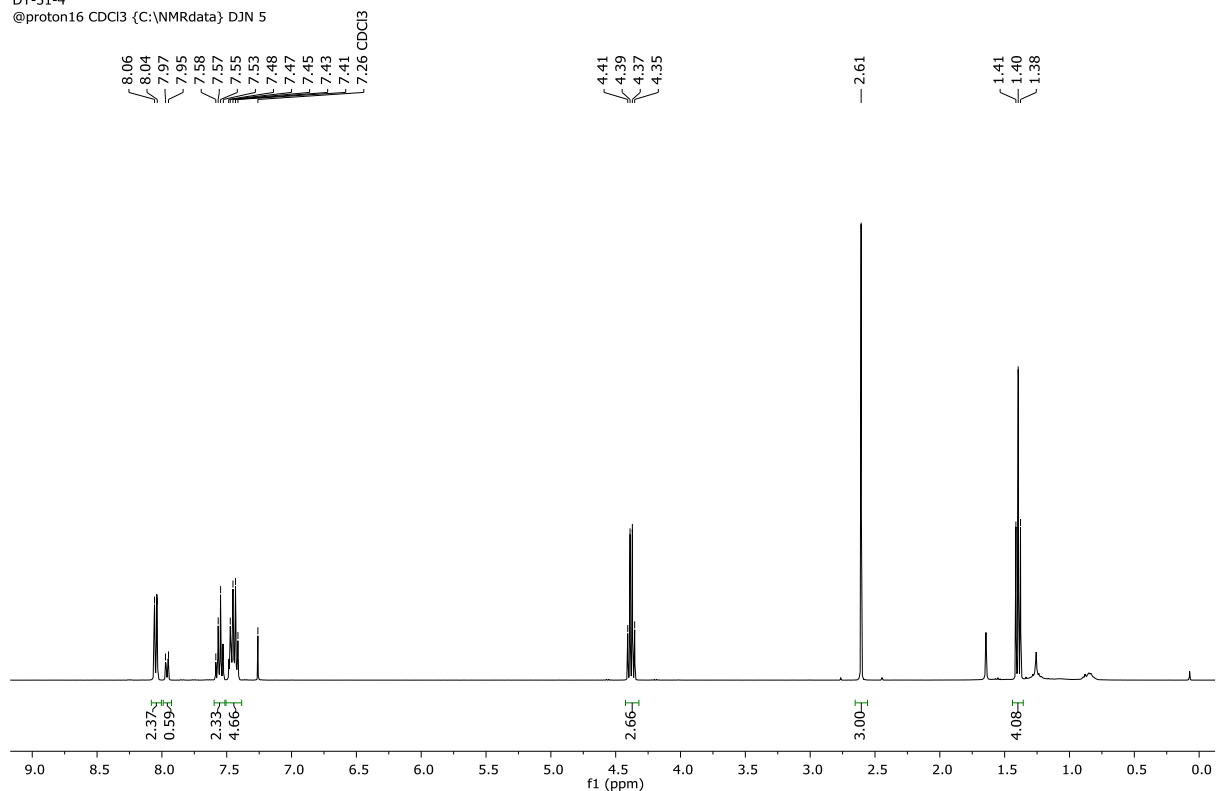

**Figure S47.**  $^1\text{H}$  NMR (400 MHz,  $\text{CDCl}_3$ ) of the competition experiment between acetophenone and ethyl benzoate (entry 2, Table S9).

D326189  
 Person kpb19112  
 DT-51-6  
 @proton CDCl3 {C:\NMRdata} DJN 33

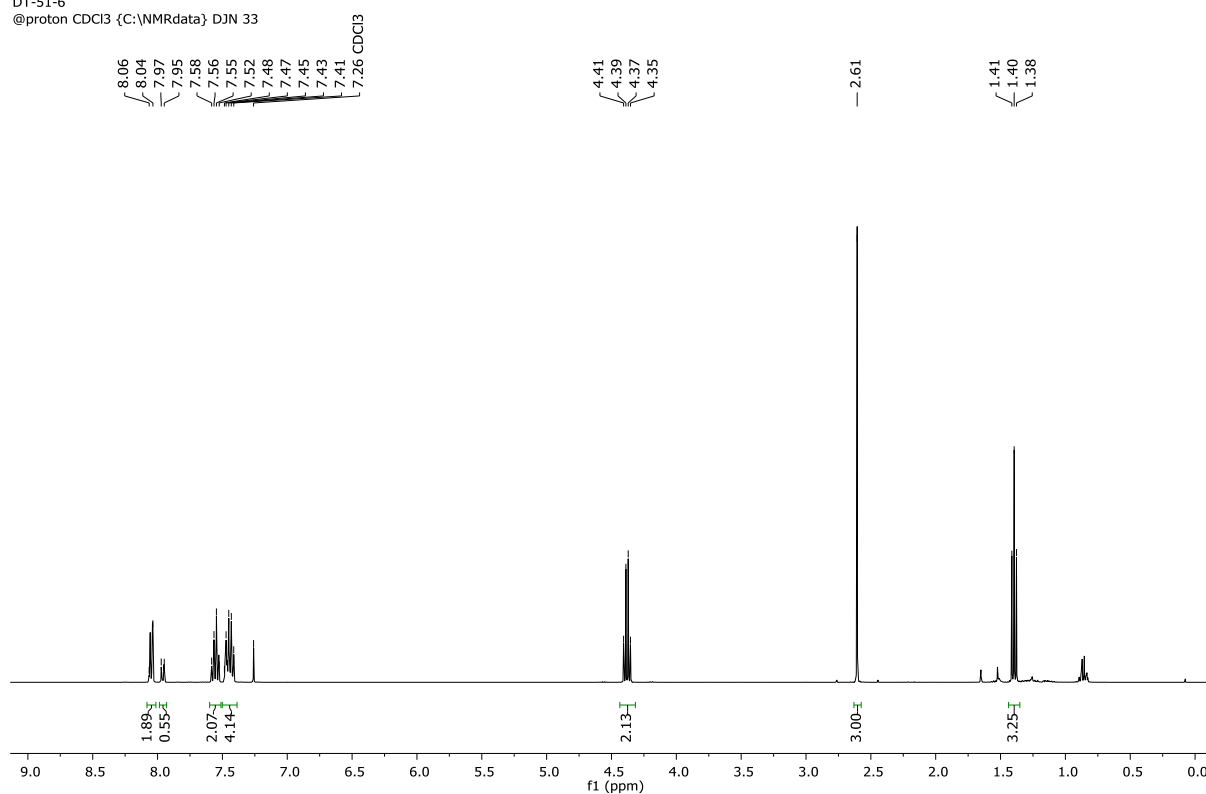

**Figure S48.**  $^1\text{H}$  NMR (400 MHz,  $\text{CDCl}_3$ ) of the competition experiment between acetophenone and ethyl benzoate (entry 3, Table S9).

**Table S10.** Determination of the competition rate constant  $\kappa$  from the labelling experiment between acetanilide and benzamide.

|                                                                                                                                                                                                                                                                                                                                                                                            | Substrate <b>R1</b>                                                               | Substrate <b>R2</b>                                                               | Catalyst                                                             |                              |                              |                  |          |
|--------------------------------------------------------------------------------------------------------------------------------------------------------------------------------------------------------------------------------------------------------------------------------------------------------------------------------------------------------------------------------------------|-----------------------------------------------------------------------------------|-----------------------------------------------------------------------------------|----------------------------------------------------------------------|------------------------------|------------------------------|------------------|----------|
|                                                                                                                                                                                                                                                                                                                                                                                            | 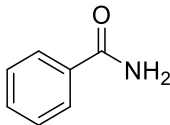 |  | <b>Ir-1</b><br>[(COD)Ir(IMes)PPh <sub>3</sub> ][BArF <sub>24</sub> ] |                              |                              |                  |          |
| <b>Mass</b>                                                                                                                                                                                                                                                                                                                                                                                | 12.1 mg                                                                           | 13.5 mg                                                                           | 4.3 mg (2.5 mol %)                                                   |                              |                              |                  |          |
| Deuteration expected at $\delta$ ( <b>R1</b> ) = 7.91 – 7.84 ppm and at $\delta$ ( <b>R2</b> ) = 7.60 – 7.55 ppm                                                                                                                                                                                                                                                                           |                                                                                   |                                                                                   |                                                                      |                              |                              |                  |          |
| Determined against integral at $\delta$ ( <b>R1</b> ) = 7.47 – 7.41 ppm and at $\delta$ ( <b>R2</b> ) = 7.30 – 7.24 ppm                                                                                                                                                                                                                                                                    |                                                                                   |                                                                                   |                                                                      |                              |                              |                  |          |
| <i>Spectral details of the deuterated reaction mixture:</i>                                                                                                                                                                                                                                                                                                                                |                                                                                   |                                                                                   |                                                                      |                              |                              |                  |          |
| <sup>1</sup> H NMR (400 MHz, DMSO- <i>d</i> <sub>6</sub> ) $\delta$ = 9.90 (br, 1H, <b>R2</b> ), 7.96 (br, 1H, <b>R1</b> ), 7.91 – 7.84 (m, 2H/D, <b>R1</b> ), 7.60 – 7.55 (m, 2H/D, <b>R2</b> ), 7.54 – 7.41 (m, 1H, <b>R1</b> ), 7.47 – 7.41 (m, 2H, <b>R1</b> ), 7.35 (br, 1H, <b>R1</b> ), 7.30 – 7.24 (m, 2H, <b>R2</b> ), 7.04 – 6.99 (m, 1H, <b>R2</b> ), 2.04 (s, 3H, <b>R2</b> ). |                                                                                   |                                                                                   |                                                                      |                              |                              |                  |          |
| Entry                                                                                                                                                                                                                                                                                                                                                                                      | I <sub>R1(t)</sub><br>N = 2H                                                      | I <sub>R1(0)</sub><br>N = 2H                                                      | %D <sub>R1</sub>                                                     | I <sub>R2(t)</sub><br>N = 2H | I <sub>R2(0)</sub><br>N = 2H | %D <sub>R2</sub> | $\kappa$ |
| <b>1</b>                                                                                                                                                                                                                                                                                                                                                                                   | 1.75                                                                              | 1.93                                                                              | 9                                                                    | 1.86                         | 2.00                         | 7                | 1.35     |
| <b>2</b>                                                                                                                                                                                                                                                                                                                                                                                   | 1.76                                                                              | 1.98                                                                              | 11                                                                   | 1.86                         | 2.00                         | 7                | 1.62     |
| <b>3</b>                                                                                                                                                                                                                                                                                                                                                                                   | 1.72                                                                              | 1.96                                                                              | 12                                                                   | 1.85                         | 2.00                         | 8                | 1.68     |
| <b>Average <math>\kappa</math> = 1.55</b>                                                                                                                                                                                                                                                                                                                                                  |                                                                                   |                                                                                   |                                                                      |                              |                              |                  |          |

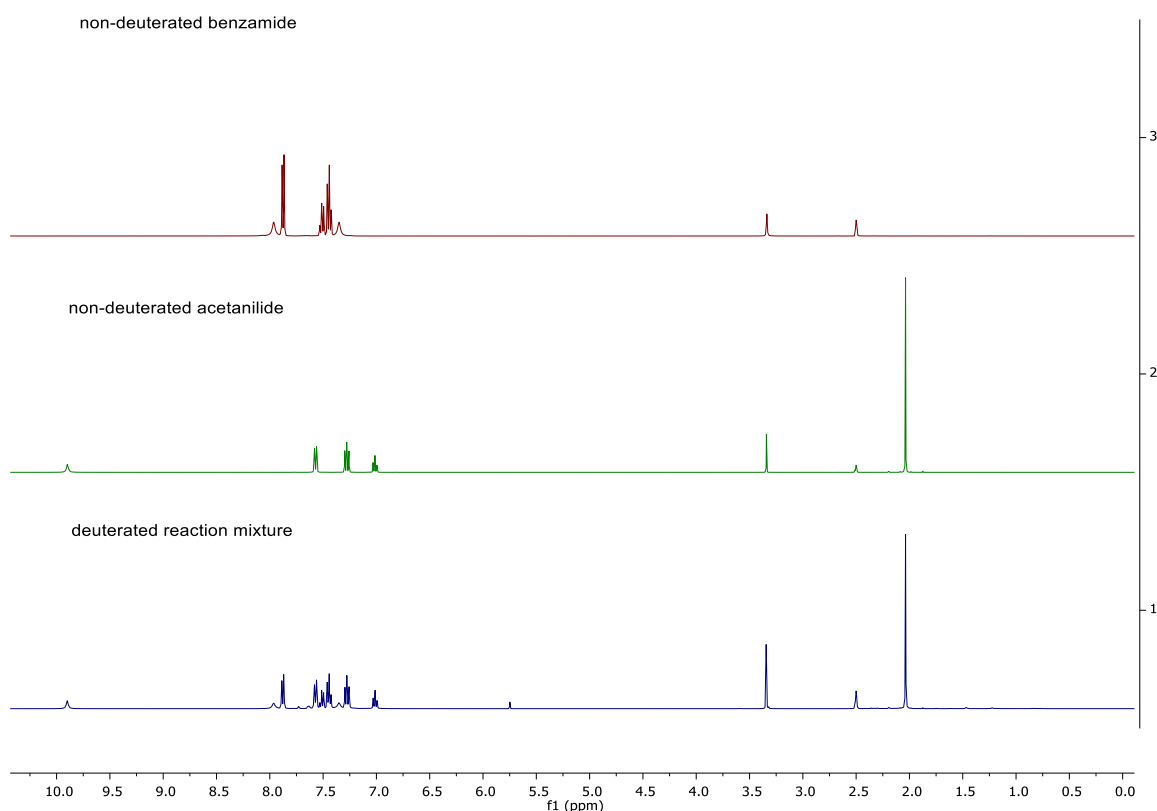

**Figure S49.** Stacked <sup>1</sup>H NMR (400 MHz, DMSO-*d*<sub>6</sub>) of non-deuterated substrates and reaction mixture.

D331243  
 Person kpb19112  
 DT-104-1  
 @proton DMSO {C:\NMRdata} DJN 25

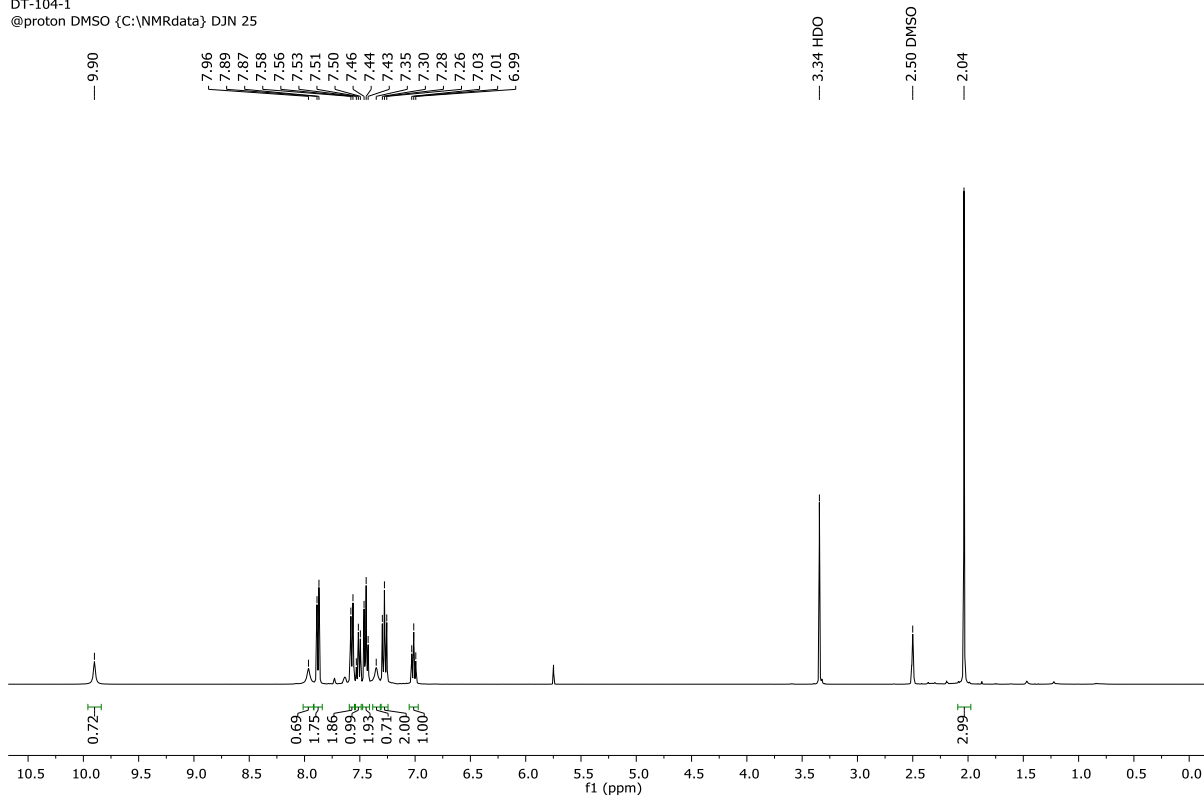

**Figure S50.**  $^1\text{H}$  NMR (400 MHz,  $\text{DMSO}-d_6$ ) of the competition experiment between acetanilide and benzamide (entry 1, Table S10).

D331244  
 Person kpb19112  
 DT-104-2  
 @proton DMSO {C:\NMRdata} DJN 26

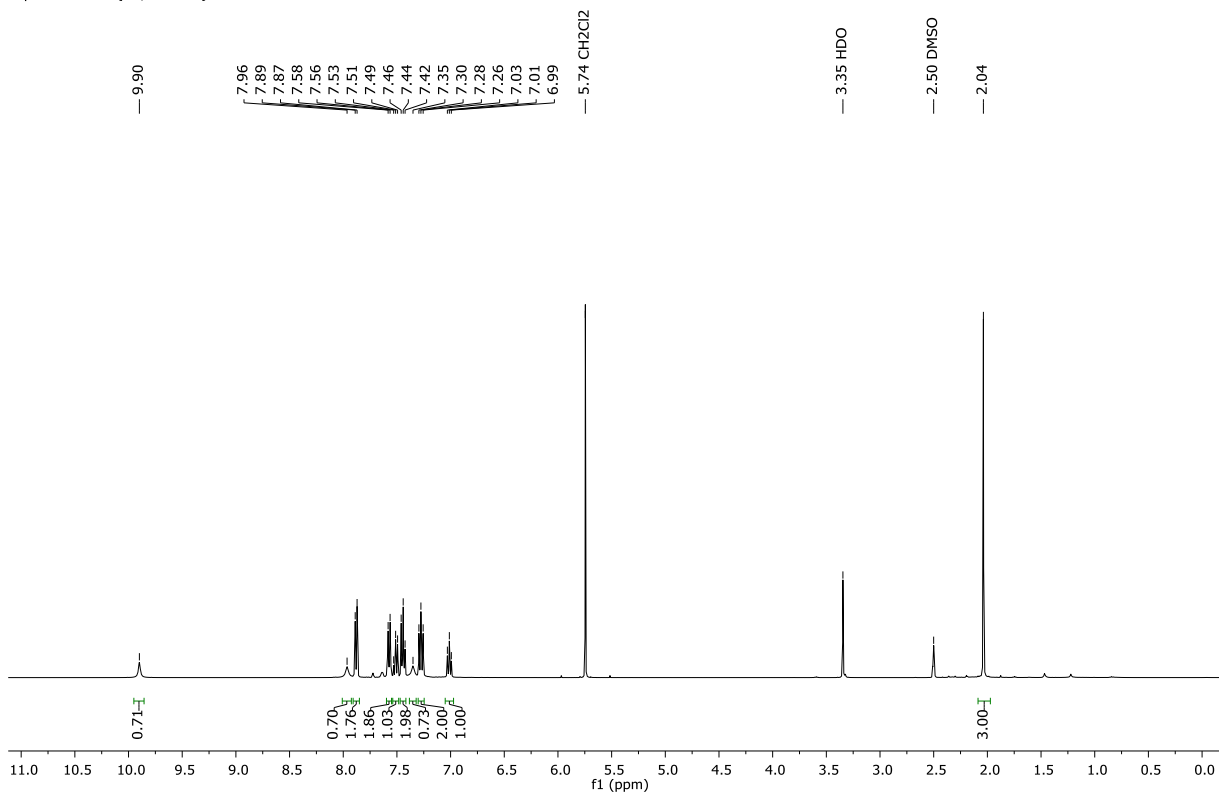

**Figure S51.**  $^1\text{H}$  NMR (400 MHz,  $\text{DMSO}-d_6$ ) of the competition experiment between acetanilide and benzamide (entry 2, Table S10).



D331588  
 Person kpb19112  
 DT-104-3  
 @proton DMSO {C:\NMRdata} DJN 7

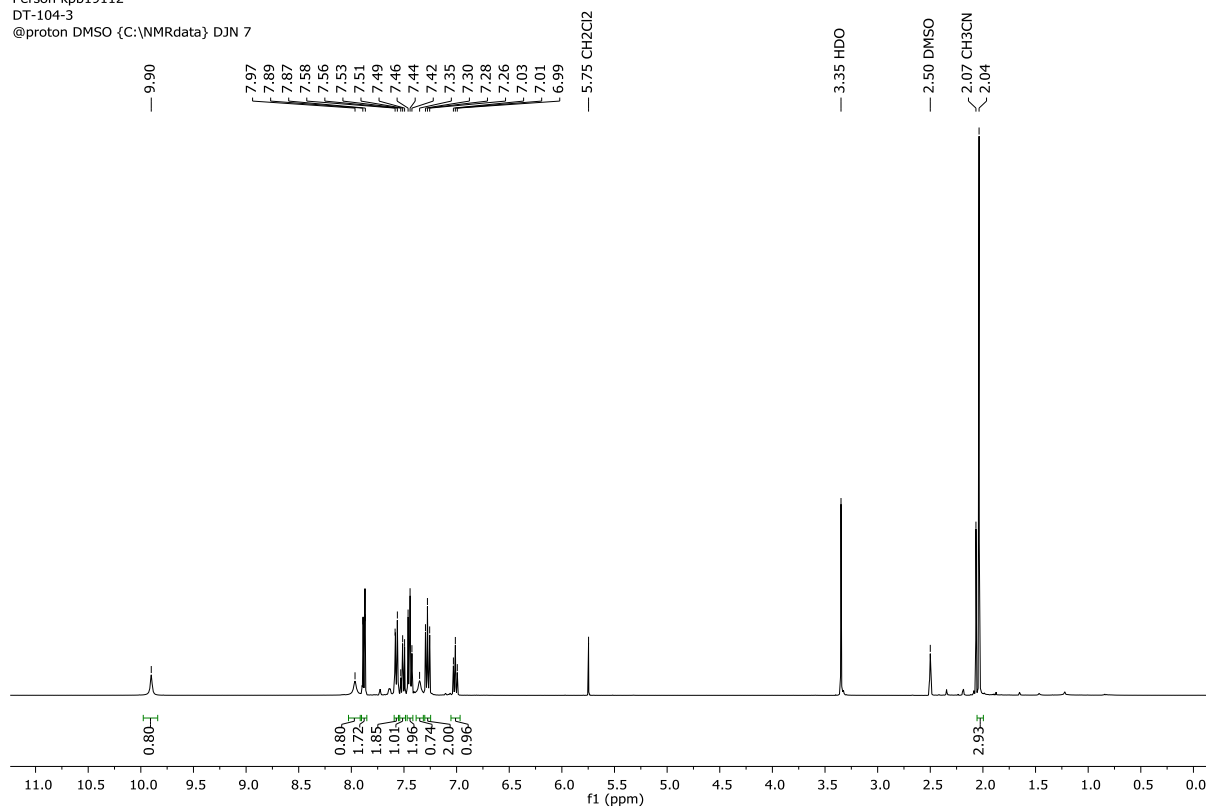

**Figure S52.** <sup>1</sup>H NMR (400 MHz, DMSO-*d*<sub>6</sub>) of the competition experiment between acetanilide and benzamide (entry 3, Table S10).

**Table S11.** Determination of the competition rate constant  $\kappa$  from the labelling experiment between acetanilide and nitrobenzene.

|                                                                                                                                                                                                                                                                                                                                      | Substrate <b>R1</b>                                                               | Substrate <b>R2</b>                                                               | Catalyst                                                             |                       |                       |                  |          |
|--------------------------------------------------------------------------------------------------------------------------------------------------------------------------------------------------------------------------------------------------------------------------------------------------------------------------------------|-----------------------------------------------------------------------------------|-----------------------------------------------------------------------------------|----------------------------------------------------------------------|-----------------------|-----------------------|------------------|----------|
|                                                                                                                                                                                                                                                                                                                                      | 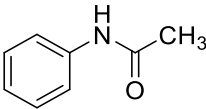 |  | <b>Ir-1</b><br>[(COD)Ir(IMes)PPh <sub>3</sub> ][BArF <sub>24</sub> ] |                       |                       |                  |          |
| <b>Mass</b>                                                                                                                                                                                                                                                                                                                          | 13.5 mg                                                                           | 12.3 mg                                                                           | 4.3 mg (2.5 mol %)                                                   |                       |                       |                  |          |
| Deuteration expected at $\delta$ ( <b>R1</b> ) = 7.60 – 7.55 ppm and at $\delta$ ( <b>R2</b> ) = 8.26 – 8.20 ppm                                                                                                                                                                                                                     |                                                                                   |                                                                                   |                                                                      |                       |                       |                  |          |
| Determined against integral at $\delta$ ( <b>R1</b> ) = 7.30 – 7.24 ppm and at $\delta$ ( <b>R2</b> ) = 7.87 – 7.81 ppm                                                                                                                                                                                                              |                                                                                   |                                                                                   |                                                                      |                       |                       |                  |          |
| <i>Spectral details of the deuterated reaction mixture:</i>                                                                                                                                                                                                                                                                          |                                                                                   |                                                                                   |                                                                      |                       |                       |                  |          |
| <sup>1</sup> H NMR (400 MHz, DMSO- <i>d</i> <sub>6</sub> ) $\delta$ = 9.90 (br, 1H, <b>R1</b> ), 8.26 – 8.20 (m, 2H/D, <b>R2</b> ), 7.87 – 7.81 (m, 1H, <b>R2</b> ), 7.70 – 7.65 (m, 2H, <b>R2</b> ), 7.60 – 7.55 (m, 2H/D, <b>R1</b> ), 7.30 – 7.24 (m, 2H, <b>R1</b> ), 7.04 – 6.99 (m, 1H, <b>R1</b> ), 2.04 (s, 3H, <b>R1</b> ). |                                                                                   |                                                                                   |                                                                      |                       |                       |                  |          |
| Entry                                                                                                                                                                                                                                                                                                                                | $I_{R1(t)}$<br>N = 2H                                                             | $I_{R1(0)}$<br>N = 2H                                                             | %D <sub>R1</sub>                                                     | $I_{R2(t)}$<br>N = 2H | $I_{R2(0)}$<br>N = 1H | %D <sub>R2</sub> | $\kappa$ |
| <b>1</b>                                                                                                                                                                                                                                                                                                                             | 1.11                                                                              | 2.00                                                                              | 45                                                                   | 1.75                  | 0.91                  | 4                | 15.01    |
| <b>2</b>                                                                                                                                                                                                                                                                                                                             | 0.81                                                                              | 2.00                                                                              | 60                                                                   | 1.68                  | 0.89                  | 6                | 15.63    |
| <b>3</b>                                                                                                                                                                                                                                                                                                                             | 0.94                                                                              | 2.00                                                                              | 53                                                                   | 1.73                  | 0.91                  | 5                | 14.89    |
| <b>Average <math>\kappa</math> = 15.18</b>                                                                                                                                                                                                                                                                                           |                                                                                   |                                                                                   |                                                                      |                       |                       |                  |          |

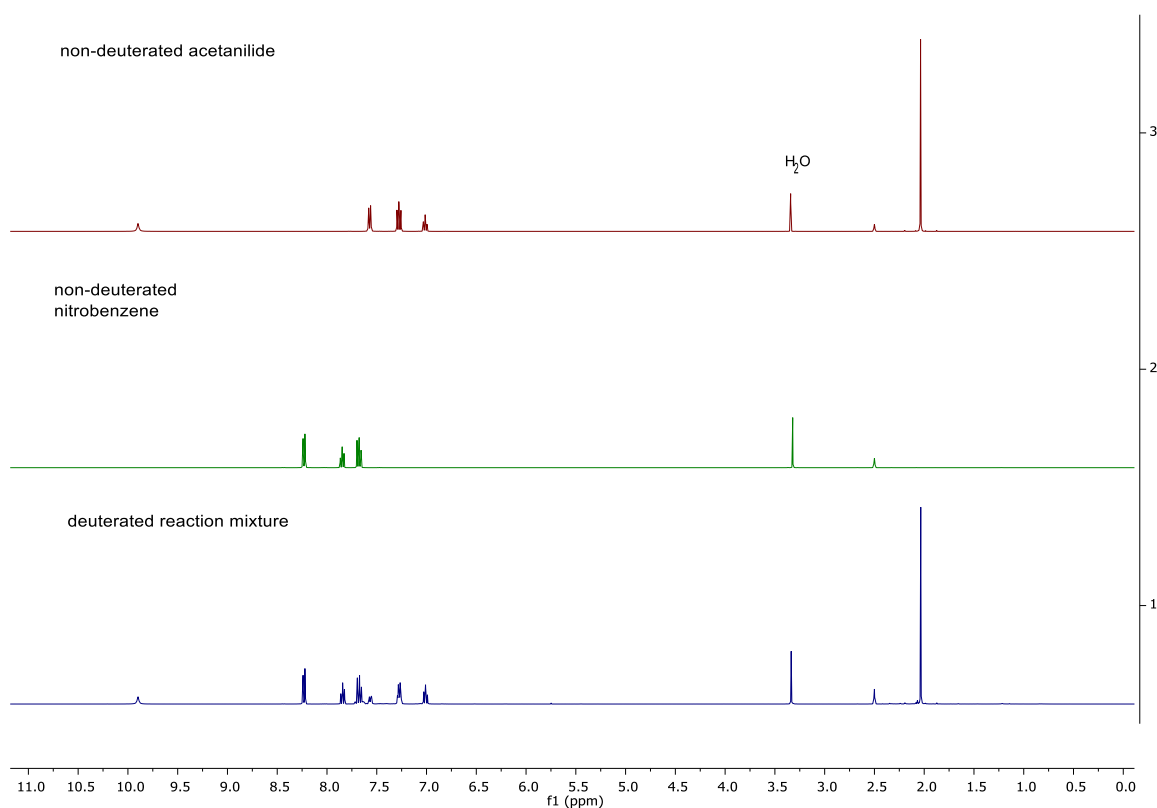

**Figure S53.** Stacked <sup>1</sup>H NMR (400 MHz, DMSO-*d*<sub>6</sub>) of non-deuterated substrates and reaction mixture.

D331157  
 Person kpb19112  
 DT-102-1  
 @proton DMSO {C:\NMRdata} DJN 45

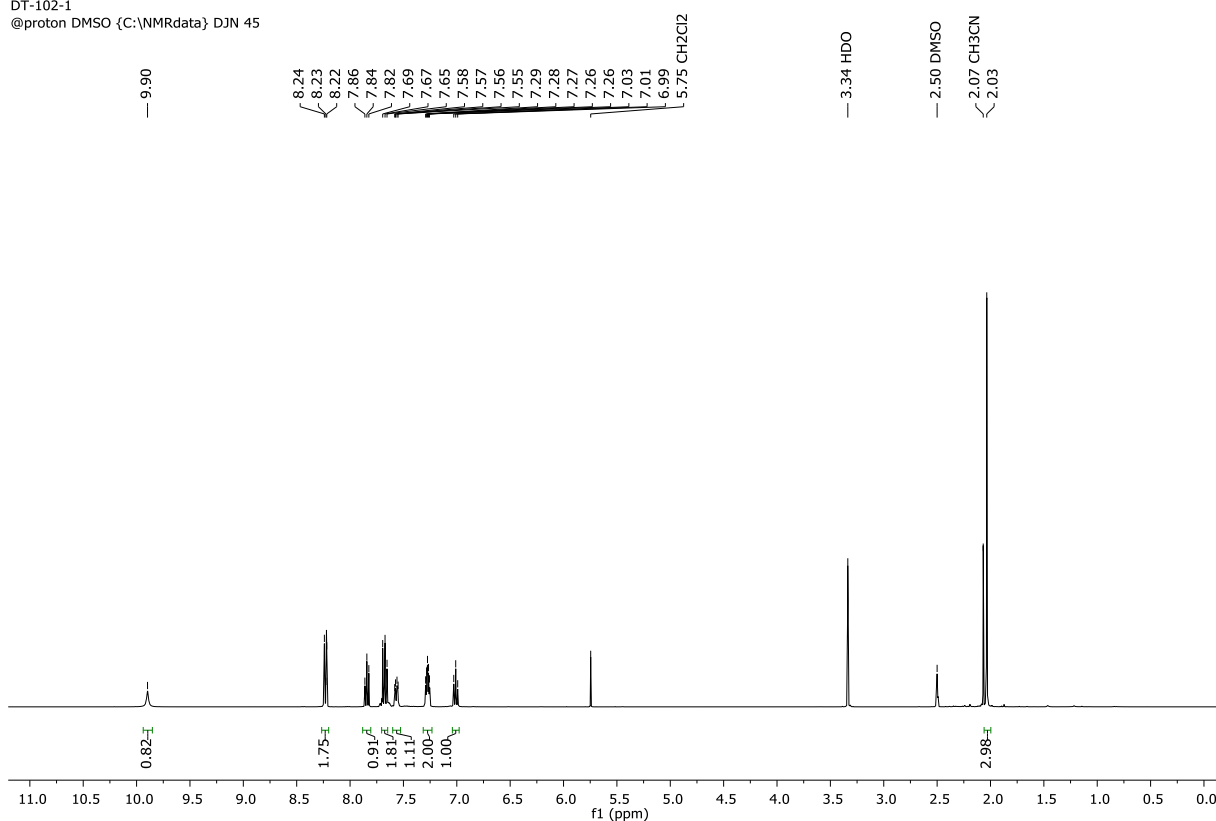

**Figure S54.** <sup>1</sup>H NMR (400 MHz, DMSO-*d*<sub>6</sub>) of the competition experiment between acetanilide and nitrobenzene (entry 1, Table S11).

D331158  
 Person kpb19112  
 DT-102-2  
 @proton DMSO {C:\NMRdata} DJN 46

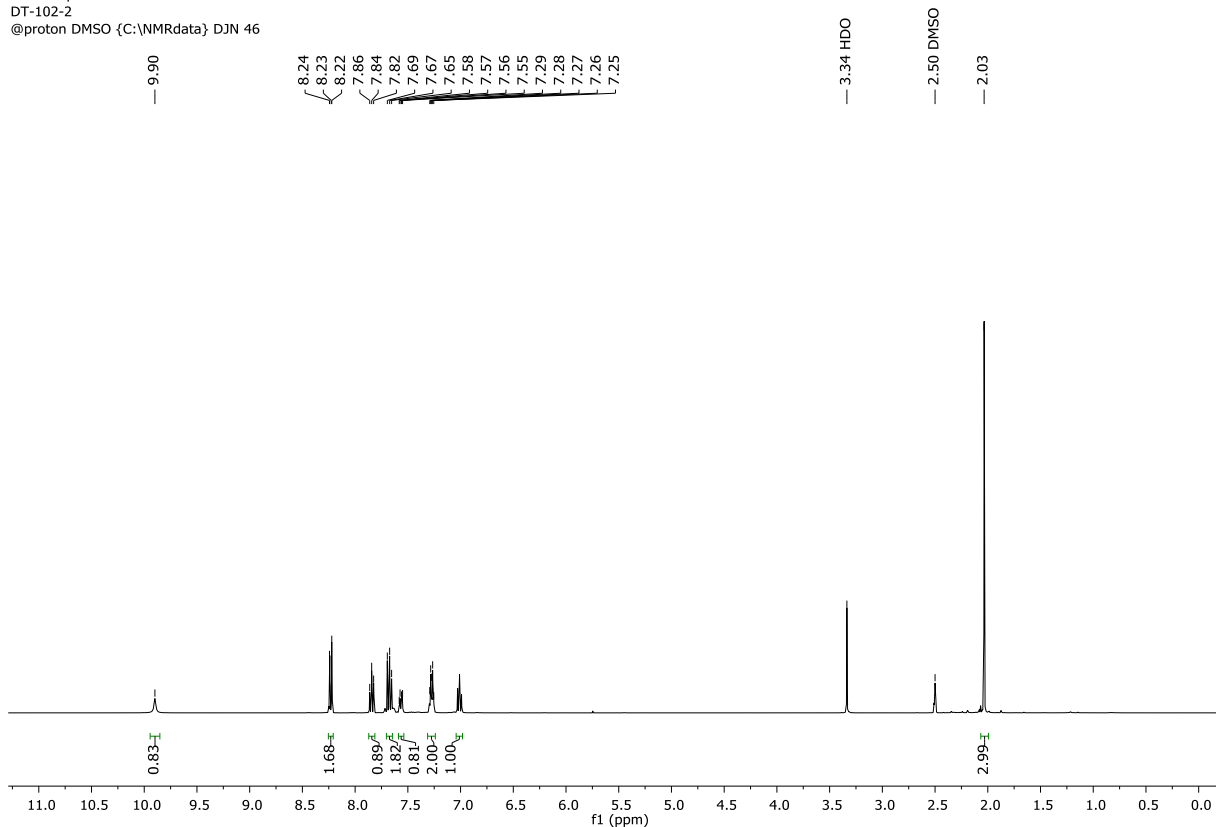

**Figure S55.** <sup>1</sup>H NMR (400 MHz, DMSO-*d*<sub>6</sub>) of the competition experiment between acetanilide and nitrobenzene (entry 2, Table S11).

D331582.1.fid  
 Person kpb19112  
 DT-102-3  
 @proton DMSO {C:\NMRdata} DJN 3

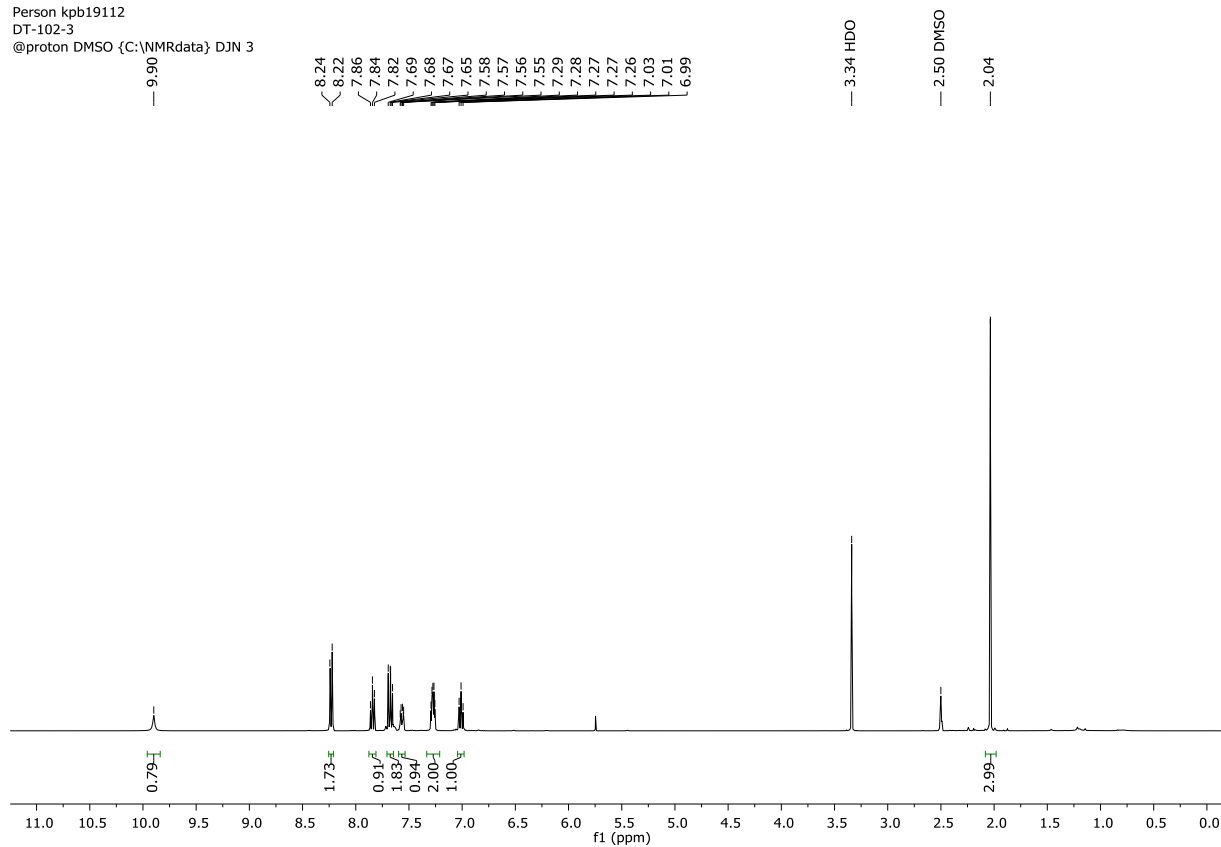

**Figure S56.**  $^1\text{H}$  NMR (400 MHz,  $\text{DMSO-}d_6$ ) of the competition experiment between acetanilide and nitrobenzene (entry 3, Table S11).

**Table S12.** Determination of the competition rate constant  $\kappa$  from the labelling experiment between 2-phenylpyrimidine and benzamide.

|                                                                                                                                                                                                                                                                                                | Substrate <b>R1</b>                                                               | Substrate <b>R2</b>                                                               | Catalyst                                                             |                              |                              |                  |          |
|------------------------------------------------------------------------------------------------------------------------------------------------------------------------------------------------------------------------------------------------------------------------------------------------|-----------------------------------------------------------------------------------|-----------------------------------------------------------------------------------|----------------------------------------------------------------------|------------------------------|------------------------------|------------------|----------|
|                                                                                                                                                                                                                                                                                                | 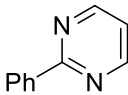 |  | <b>Ir-1</b><br>[(COD)Ir(IMes)PPh <sub>3</sub> ][BArF <sub>24</sub> ] |                              |                              |                  |          |
| <b>Mass</b>                                                                                                                                                                                                                                                                                    | 15.6 mg                                                                           | 12.1 mg                                                                           | 8.7 mg                                                               |                              |                              |                  |          |
| Deuteration expected at $\delta$ ( <b>R1</b> ) = 8.48 – 8.43 ppm and at $\delta$ ( <b>R2</b> ) = 7.85 – 7.77 ppm<br>Determined against integral at $\delta$ ( <b>R1</b> ) = 8.81 ppm and at $\delta$ 7.55 – 7.39 ppm for <b>R2</b>                                                             |                                                                                   |                                                                                   |                                                                      |                              |                              |                  |          |
| <i>Spectral details of the deuterated reaction mixture:</i>                                                                                                                                                                                                                                    |                                                                                   |                                                                                   |                                                                      |                              |                              |                  |          |
| <sup>1</sup> H NMR (400 MHz, CDCl <sub>3</sub> ) $\delta$ = 8.81 (d, $J$ = 4.9 Hz, 2H, <b>R1</b> ), 8.48 – 8.43 (m, 2H/D, <b>R1</b> ), 7.85 – 7.77 (m, 2H/D, <b>R2</b> ), 7.55 – 7.39 (m, 3H, <b>R1</b> and 3H, <b>R2</b> ), 7.18 (t, $J$ = 4.8 Hz, 1H, <b>R1</b> ), 6.20 (br, 2H, <b>R2</b> ) |                                                                                   |                                                                                   |                                                                      |                              |                              |                  |          |
| Entry                                                                                                                                                                                                                                                                                          | I <sub>R1(t)</sub><br>N = 2H                                                      | I <sub>R1(0)</sub><br>N = 2H                                                      | %D <sub>R1</sub>                                                     | I <sub>R2(t)</sub><br>N = 2H | I <sub>R2(0)</sub><br>N = 3H | %D <sub>R2</sub> | $\kappa$ |
| <b>1</b>                                                                                                                                                                                                                                                                                       | 0.48                                                                              | 2.00                                                                              | 76                                                                   | 2.05                         | 3.61 <sup>a</sup>            | 15               | 8.90     |
| <b>2</b>                                                                                                                                                                                                                                                                                       | 1.10                                                                              | 2.00                                                                              | 45                                                                   | 2.01                         | 3.40 <sup>b</sup>            | 11               | 4.97     |
| <b>3</b>                                                                                                                                                                                                                                                                                       | 0.77                                                                              | 2.00                                                                              | 62                                                                   | 1.96                         | 3.34 <sup>c</sup>            | 12               | 7.48     |
| <b>Average <math>\kappa</math> = 7.12</b>                                                                                                                                                                                                                                                      |                                                                                   |                                                                                   |                                                                      |                              |                              |                  |          |
| <sup>a</sup> I <sub>R2(0)</sub> = 6.61 – (2.00/2×3); <sup>b</sup> I <sub>R2(0)</sub> = 6.40 – (2.00/2×3); <sup>c</sup> I <sub>R2(0)</sub> = 6.34 – (2.00/2×3);                                                                                                                                 |                                                                                   |                                                                                   |                                                                      |                              |                              |                  |          |

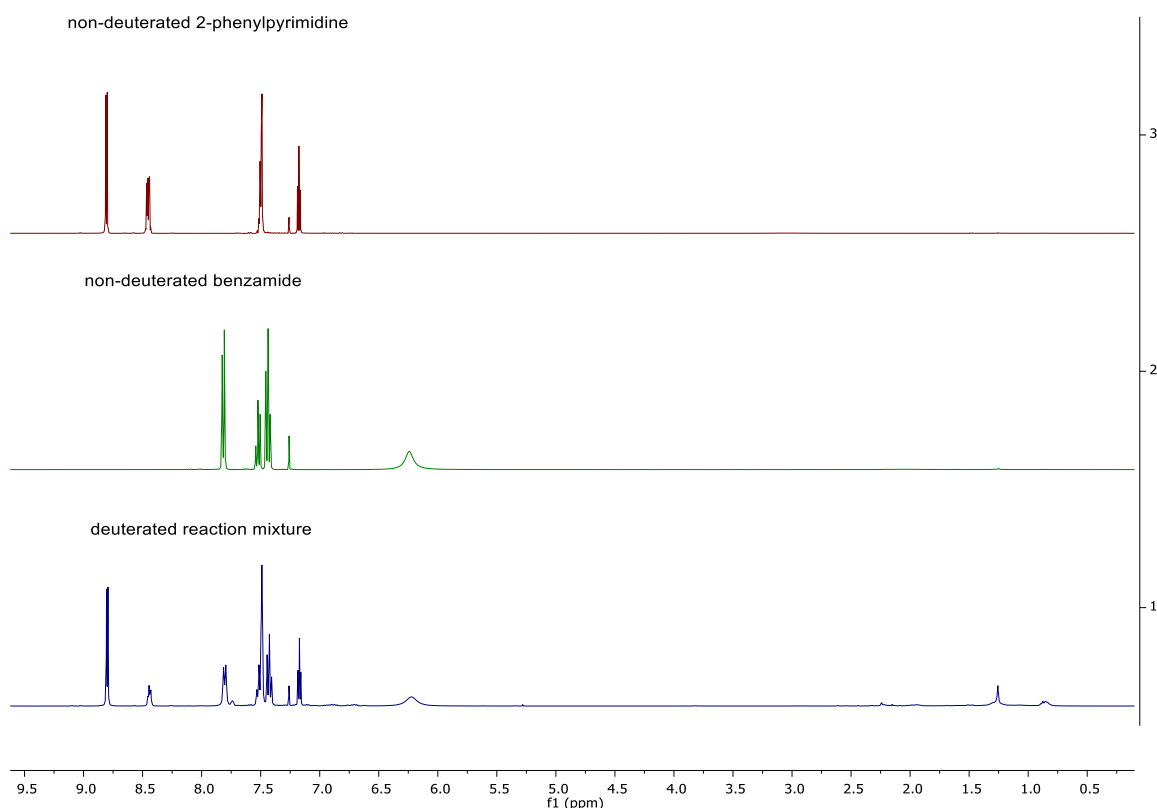

**Figure S57.** Stacked <sup>1</sup>H NMR (400 MHz, CDCl<sub>3</sub>) of non-deuterated substrates and reaction mixture.

D331128  
 Person kpb19112  
 DT-68-4  
 @proton CDCl<sub>3</sub> {C:\NMRdata} DJN 17

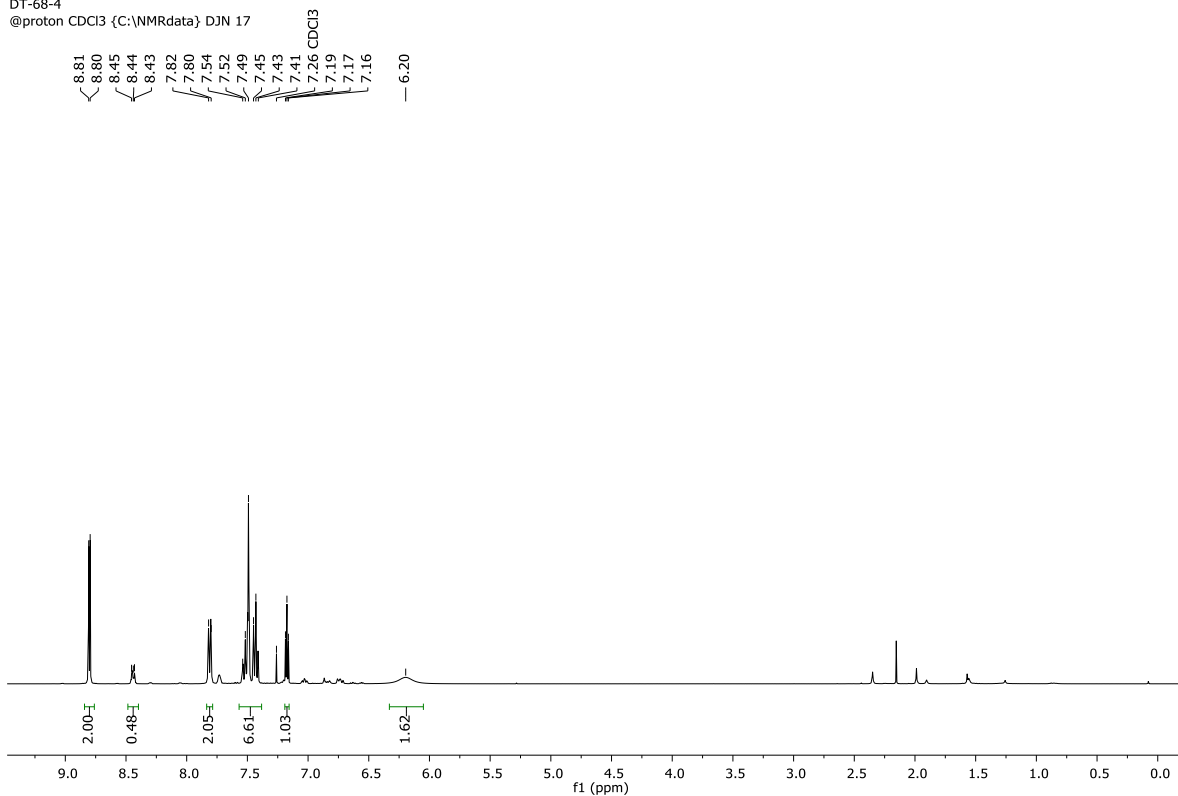

**Figure S58.** <sup>1</sup>H NMR (400 MHz, CDCl<sub>3</sub>) of the competition experiment between 2-phenylpyrimidine and benzamide (entry 1, Table S12).

D331185  
 Person kpb19112  
 DT-103-3  
 @proton CDCl<sub>3</sub> {C:\NMRdata} DJN 14

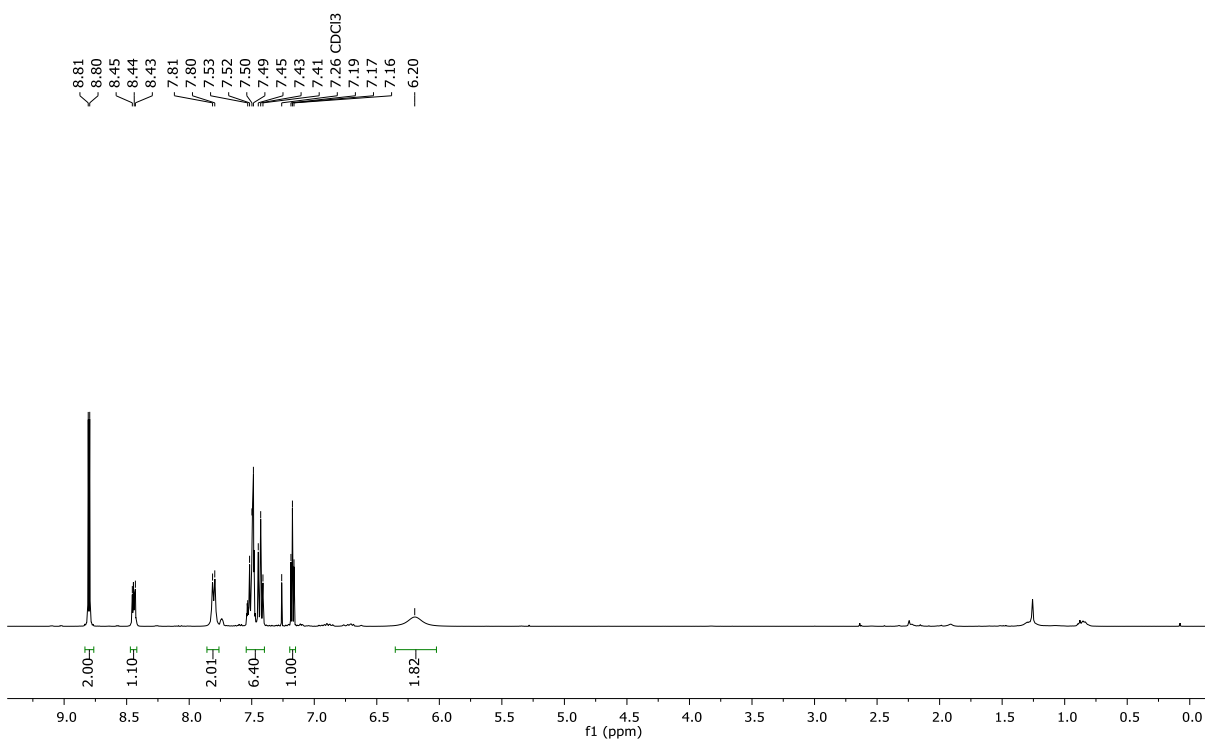

**Figure S59.** <sup>1</sup>H NMR (400 MHz, CDCl<sub>3</sub>) of the competition experiment between 2-phenylpyrimidine and benzamide (entry 2, Table S12).

D331186  
Person kpb19112  
DT-103-4  
@proton CDCl3 {C:\NMRdata} DJN 15

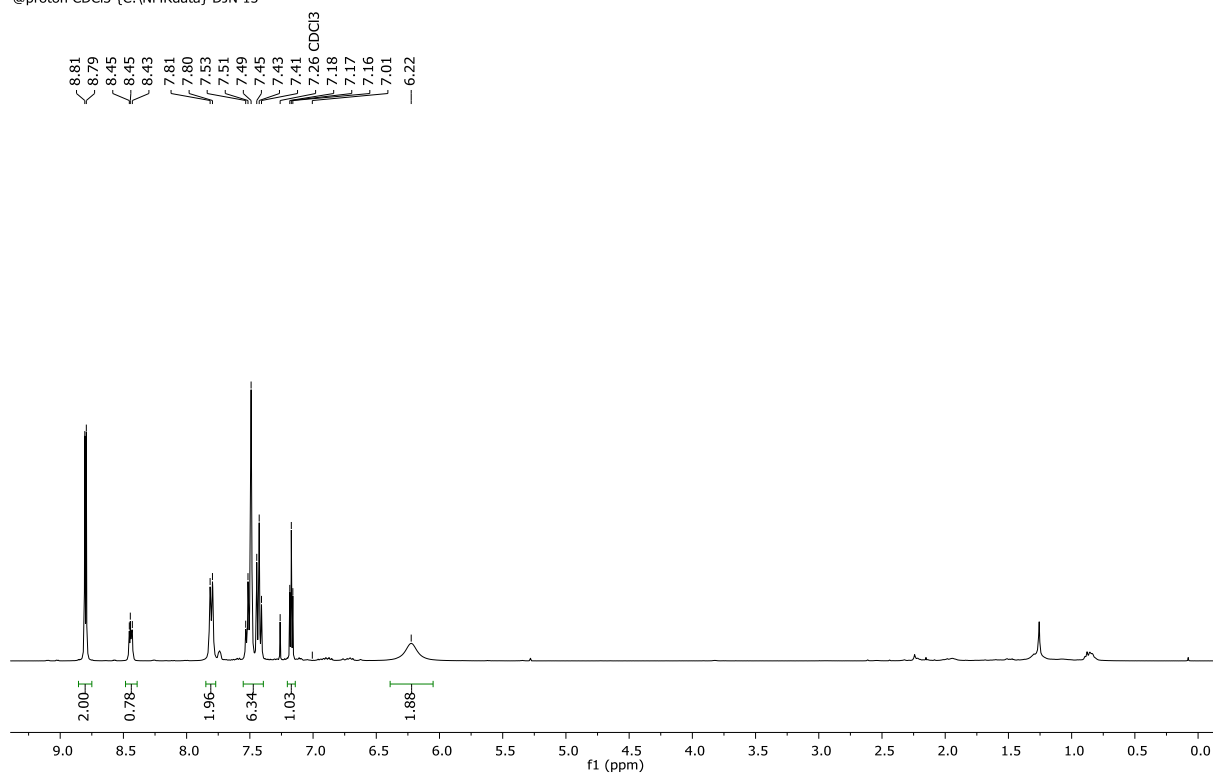

**Figure S60.** <sup>1</sup>H NMR (400 MHz, CDCl<sub>3</sub>) of the competition experiment between 2-phenylpyrimidine and benzamide (entry 3, Table S12).

**Table S13.** Determination of the competition rate constant  $\kappa$  from the labelling experiment between 2-phenylpyridine and acetophenone.

|                                                                                                                                                                                                                                                                                                                   | Substrate <b>R1</b>                                                               | Substrate <b>R2</b>                                                               | Catalyst                                                             |                              |                              |                  |          |
|-------------------------------------------------------------------------------------------------------------------------------------------------------------------------------------------------------------------------------------------------------------------------------------------------------------------|-----------------------------------------------------------------------------------|-----------------------------------------------------------------------------------|----------------------------------------------------------------------|------------------------------|------------------------------|------------------|----------|
|                                                                                                                                                                                                                                                                                                                   | 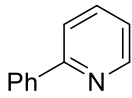 |  | <b>Ir-1</b><br>[(COD)Ir(IMes)PPh <sub>3</sub> ][BARF <sub>24</sub> ] |                              |                              |                  |          |
| Mass                                                                                                                                                                                                                                                                                                              | 15.5 mg                                                                           | 12.0 mg                                                                           | 8.7 mg                                                               |                              |                              |                  |          |
| Deuteration expected at $\delta$ ( <b>R1</b> ) = 8.02 – 7.98 ppm and at $\delta$ ( <b>R2</b> ) = 7.98 – 7.94 ppm                                                                                                                                                                                                  |                                                                                   |                                                                                   |                                                                      |                              |                              |                  |          |
| Determined against integral at $\delta$ ( <b>R1</b> ) = 7.78 – 7.70 ppm and at $\delta$ ( <b>R2</b> ) = 2.60 ppm                                                                                                                                                                                                  |                                                                                   |                                                                                   |                                                                      |                              |                              |                  |          |
| <i>Spectral details of the deuterated reaction mixture:</i>                                                                                                                                                                                                                                                       |                                                                                   |                                                                                   |                                                                      |                              |                              |                  |          |
| <sup>1</sup> H NMR (400 MHz, CDCl <sub>3</sub> ) $\delta$ = 8.74 – 8.66 (m, 1H, <b>R1</b> ), 8.02 – 7.98 (m, 2H/D, <b>R1</b> ), 7.98 – 7.94 (m, 2H/D, <b>R2</b> ), 7.78 – 7.70 (m, 2H, <b>R1</b> ), 7.59 – 7.53 (m, 1H, <b>R2</b> ), 7.51 – 7.38 (m, 2H, <b>R2</b> and 3H, <b>R1</b> ), 2.60 (s, 3H, <b>R2</b> ). |                                                                                   |                                                                                   |                                                                      |                              |                              |                  |          |
| Entry                                                                                                                                                                                                                                                                                                             | I <sub>R1(t)</sub><br>N = 2H                                                      | I <sub>R1(0)</sub><br>N = 2H                                                      | %D <sub>R1</sub>                                                     | I <sub>R2(t)</sub><br>N = 2H | I <sub>R2(0)</sub><br>N = 3H | %D <sub>R2</sub> | $\kappa$ |
| <b>1</b>                                                                                                                                                                                                                                                                                                          | 1.75                                                                              | 2.26                                                                              | 23                                                                   | 1.97                         | 3.00                         | 2                | 16.92    |
| <b>2</b>                                                                                                                                                                                                                                                                                                          | 1.62                                                                              | 2.26                                                                              | 28                                                                   | 1.96                         | 3.00                         | 2                | 16.48    |
| <b>3</b>                                                                                                                                                                                                                                                                                                          | 1.60                                                                              | 2.25                                                                              | 29                                                                   | 1.96                         | 3.00                         | 2                | 16.88    |
| <b>Average <math>\kappa</math> = 16.76</b>                                                                                                                                                                                                                                                                        |                                                                                   |                                                                                   |                                                                      |                              |                              |                  |          |

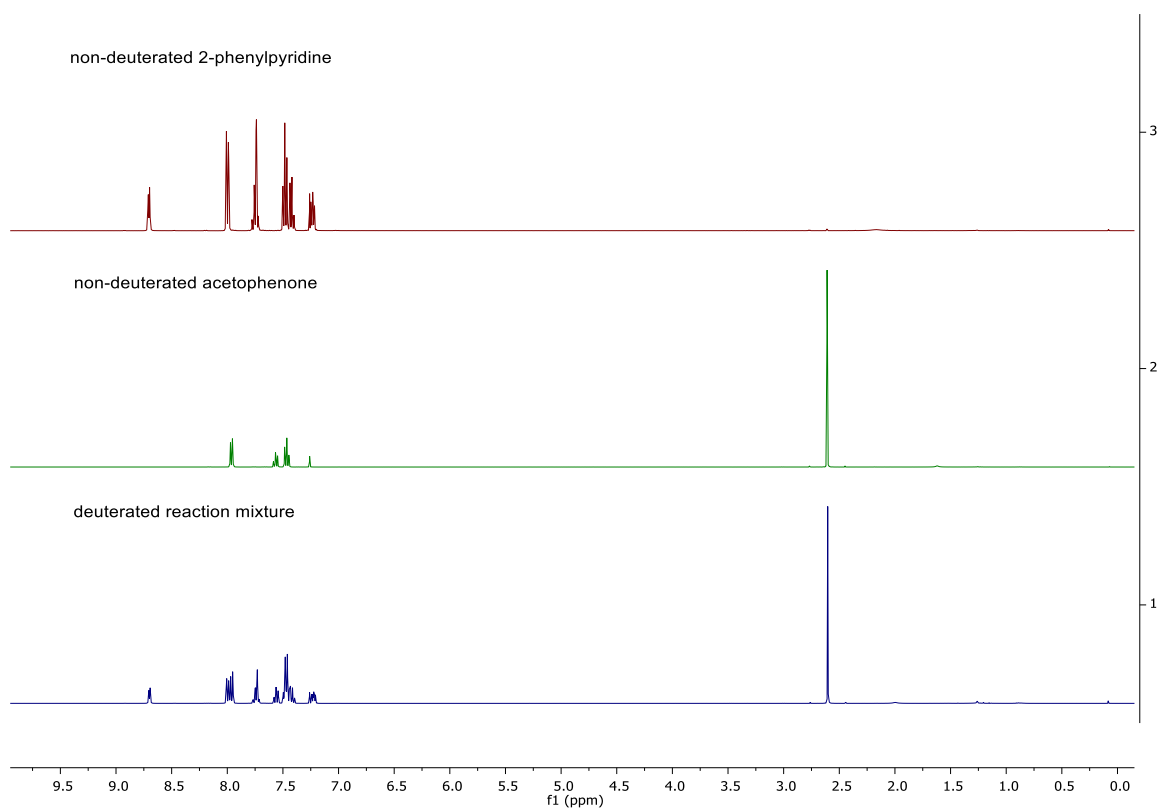

**Figure S61.** Stacked <sup>1</sup>H NMR (400 MHz, CDCl<sub>3</sub>) of non-deuterated substrates and reaction mixture.



D318631  
 Person kpb19112  
 DT-6-4  
 @proton CDCl3 {C:\NMRdata} DJN 30

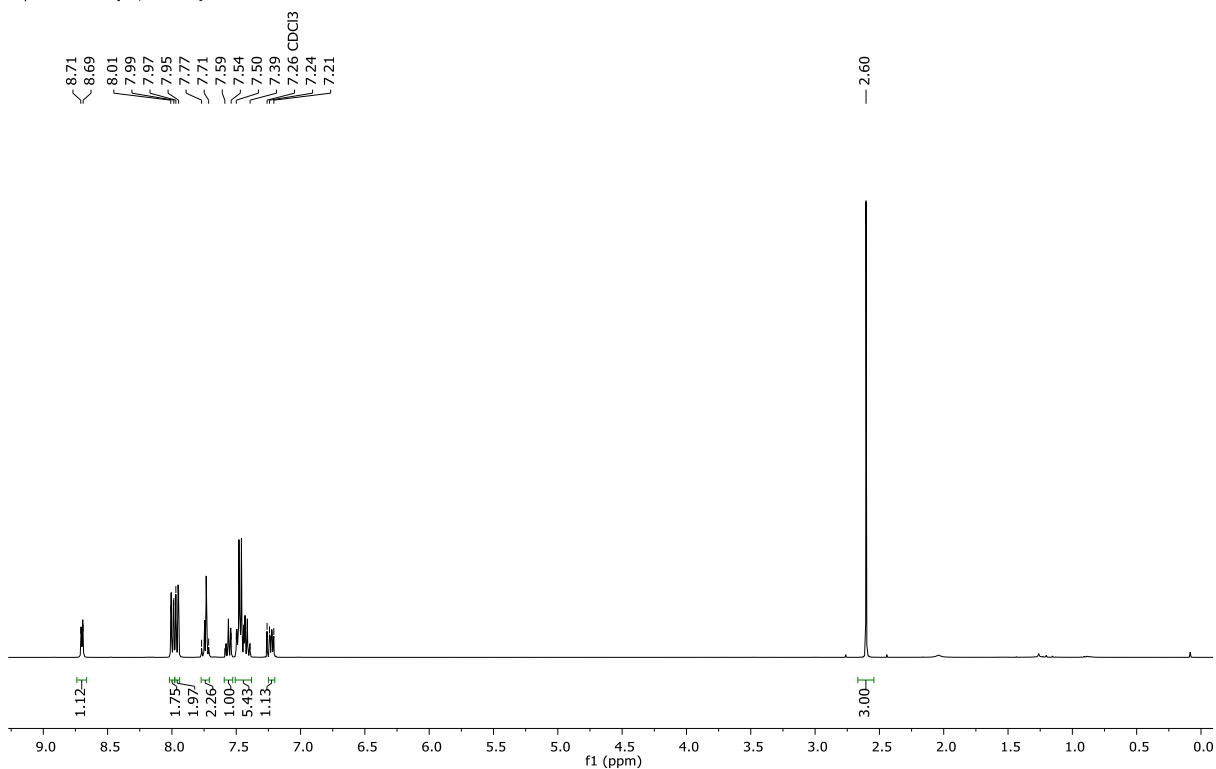

**Figure S62.**  $^1\text{H}$  NMR (400 MHz,  $\text{CDCl}_3$ ) of the competition experiment between of 2-phenylpyridine and acetophenone (entry 1, Table S13).

D318630  
 Person kpb19112  
 DT-6-3  
 @proton CDCl3 {C:\NMRdata} DJN 29

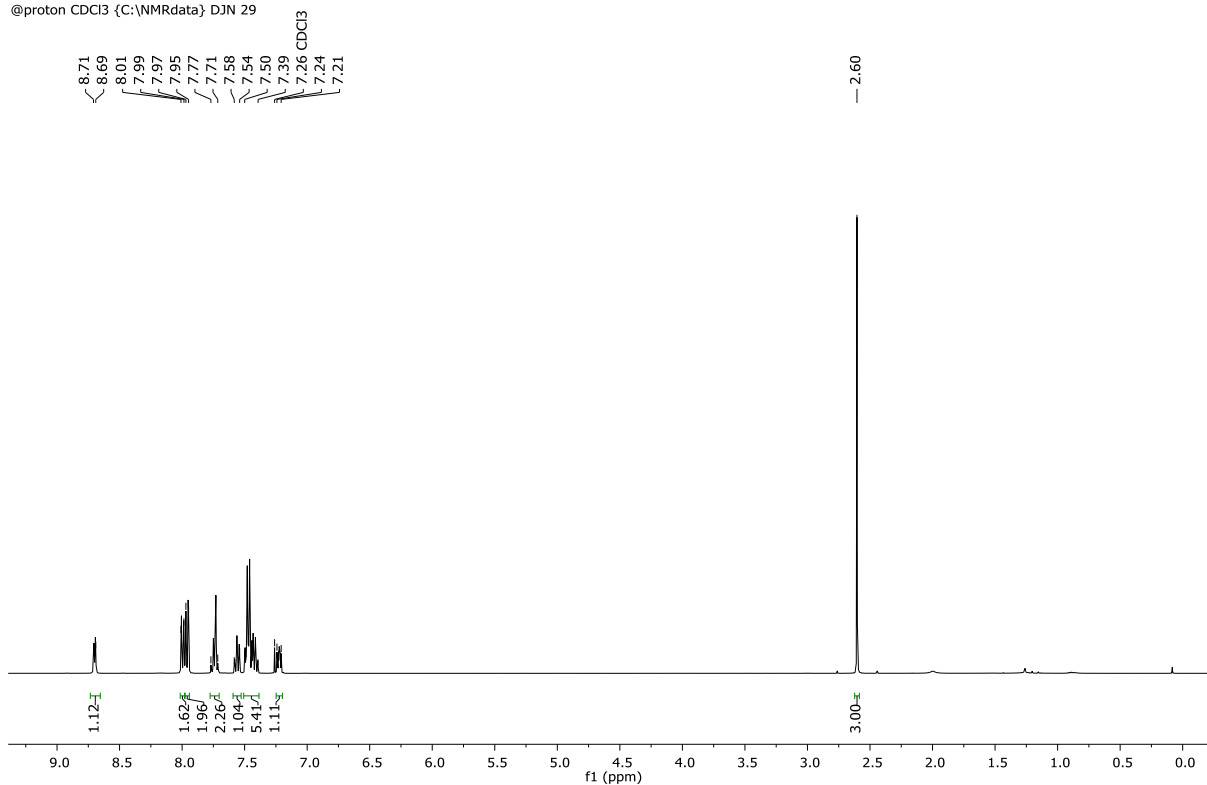

**Figure S63.**  $^1\text{H}$  NMR (400 MHz,  $\text{CDCl}_3$ ) of the competition experiment between of 2-phenylpyridine and acetophenone (entry 2, Table S13).

D318632  
Person kpb19112  
DT-6-5  
@proton CDCl3 {C:\NMRdata} DJN 31

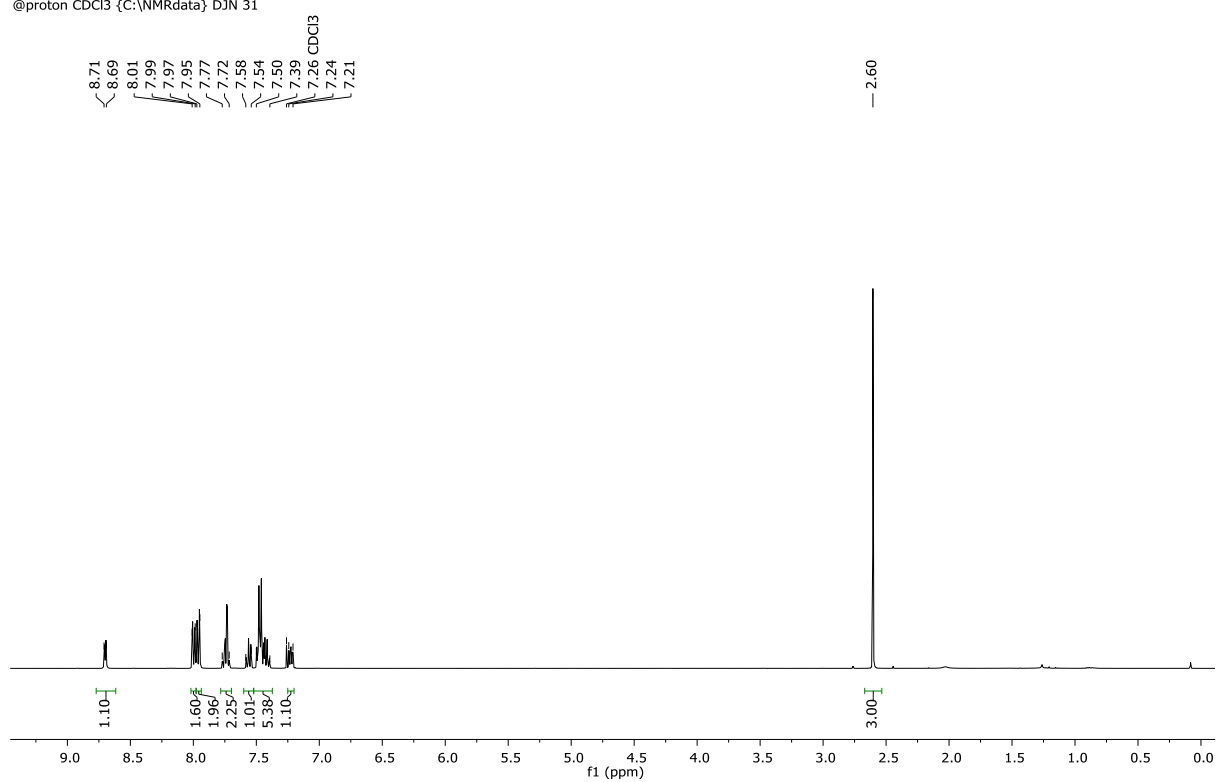

**Figure S64.** <sup>1</sup>H NMR (400 MHz, CDCl<sub>3</sub>) of the competition experiment between of 2-phenylpyridine and acetophenone (entry 3, Table S13).

**Table S14.** Determination of the competition rate constant  $\kappa$  from the labelling experiment between 2-phenyloxazoline and 2-phenylpyridine.

|                                                                                                                                                                                                                                                                                                                                                             | Substrate <b>R1</b>                                                               | Substrate <b>R2</b>                                                               | Catalyst                                                             |                              |                              |                  |          |
|-------------------------------------------------------------------------------------------------------------------------------------------------------------------------------------------------------------------------------------------------------------------------------------------------------------------------------------------------------------|-----------------------------------------------------------------------------------|-----------------------------------------------------------------------------------|----------------------------------------------------------------------|------------------------------|------------------------------|------------------|----------|
|                                                                                                                                                                                                                                                                                                                                                             | 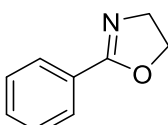 |  | <b>Ir-1</b><br>[(COD)Ir(IMes)PPh <sub>3</sub> ][BArF <sub>24</sub> ] |                              |                              |                  |          |
| <b>Mass</b>                                                                                                                                                                                                                                                                                                                                                 | 14.7 mg                                                                           | 15.5 mg                                                                           | 8.7 mg                                                               |                              |                              |                  |          |
| Deuteration expected at $\delta$ ( <b>R1</b> ) = 7.97 – 7.93 ppm and at $\delta$ ( <b>R2</b> ) = 8.02 – 7.98 ppm                                                                                                                                                                                                                                            |                                                                                   |                                                                                   |                                                                      |                              |                              |                  |          |
| Determined against integral at $\delta$ ( <b>R1</b> ) = 4.44 ppm and at $\delta$ ( <b>R2</b> ) = 7.78 – 7.70 ppm                                                                                                                                                                                                                                            |                                                                                   |                                                                                   |                                                                      |                              |                              |                  |          |
| <i>Spectral details of the deuterated reaction mixture:</i>                                                                                                                                                                                                                                                                                                 |                                                                                   |                                                                                   |                                                                      |                              |                              |                  |          |
| <sup>1</sup> H NMR (400 MHz, CDCl <sub>3</sub> ) $\delta$ = 8.74 – 8.65 (m, 1H, <b>R2</b> ), 8.02 – 7.98 (m, 2H/D <b>R1</b> ), 7.97 – 7.93 (m, 2H/D <b>R2</b> ), 7.78 – 7.70 (m, 2 <b>R2</b> ), 7.51 – 7.37 (m, 3H, <b>R1</b> and 3H, <b>R2</b> ), 7.25 – 7.20 (m, 1H, R2), 4.44 (t, $J$ = 9.5 Hz, 2H, <b>R1</b> ), 4.07 (t, $J$ = 9.5 Hz, 2H, <b>R1</b> ). |                                                                                   |                                                                                   |                                                                      |                              |                              |                  |          |
| Entry                                                                                                                                                                                                                                                                                                                                                       | I <sub>R1(t)</sub><br>N = 2H                                                      | I <sub>R1(0)</sub><br>N = 2H                                                      | %D <sub>R1</sub>                                                     | I <sub>R2(t)</sub><br>N = 2H | I <sub>R2(0)</sub><br>N = 2H | %D <sub>R2</sub> | $\kappa$ |
| <b>1</b>                                                                                                                                                                                                                                                                                                                                                    | 0.61                                                                              | 1.36                                                                              | 55                                                                   | 1.40                         | 2.00                         | 30               | 2.25     |
| <b>2</b>                                                                                                                                                                                                                                                                                                                                                    | 0.72                                                                              | 1.36                                                                              | 47                                                                   | 1.59                         | 2.00                         | 21               | 2.77     |
| <b>3</b>                                                                                                                                                                                                                                                                                                                                                    | 0.44                                                                              | 1.59                                                                              | 72                                                                   | 1.41                         | 2.00                         | 30               | 3.68     |
| <b>Average <math>\kappa</math> = 2.90</b>                                                                                                                                                                                                                                                                                                                   |                                                                                   |                                                                                   |                                                                      |                              |                              |                  |          |

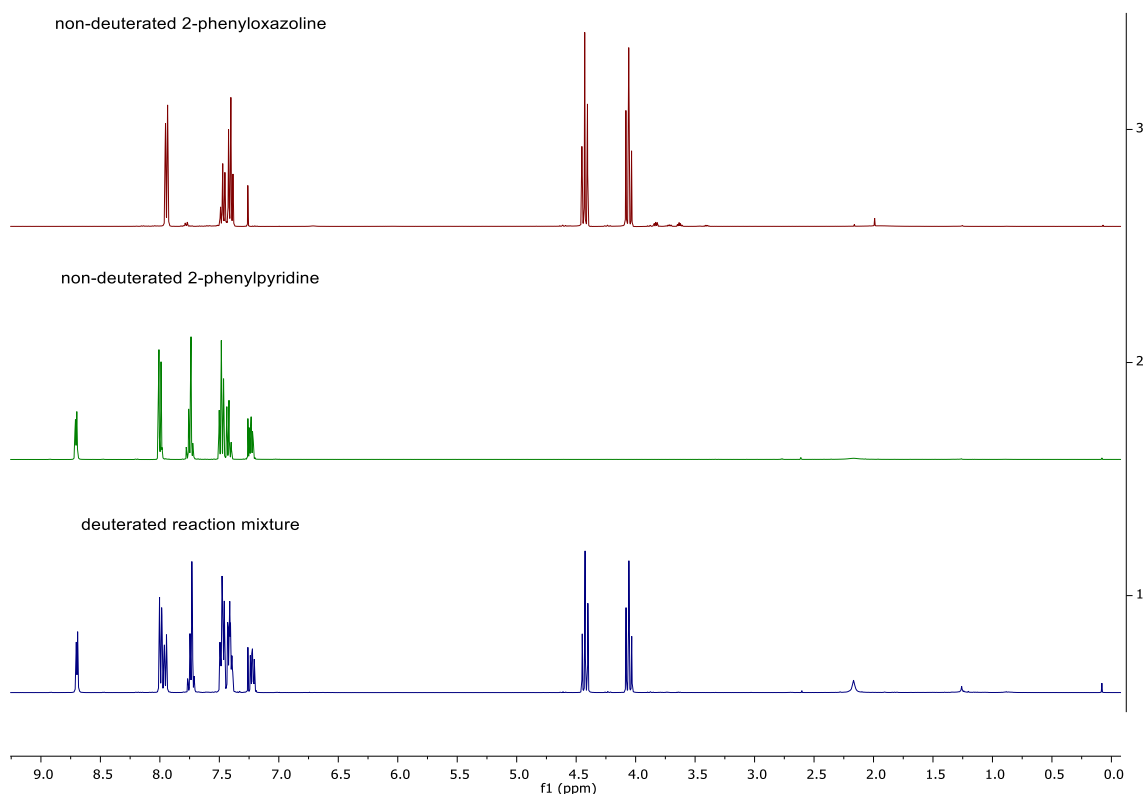

**Figure S65.** Stacked <sup>1</sup>H NMR (400 MHz, CDCl<sub>3</sub>) of non-deuterated substrates and reaction mixture.

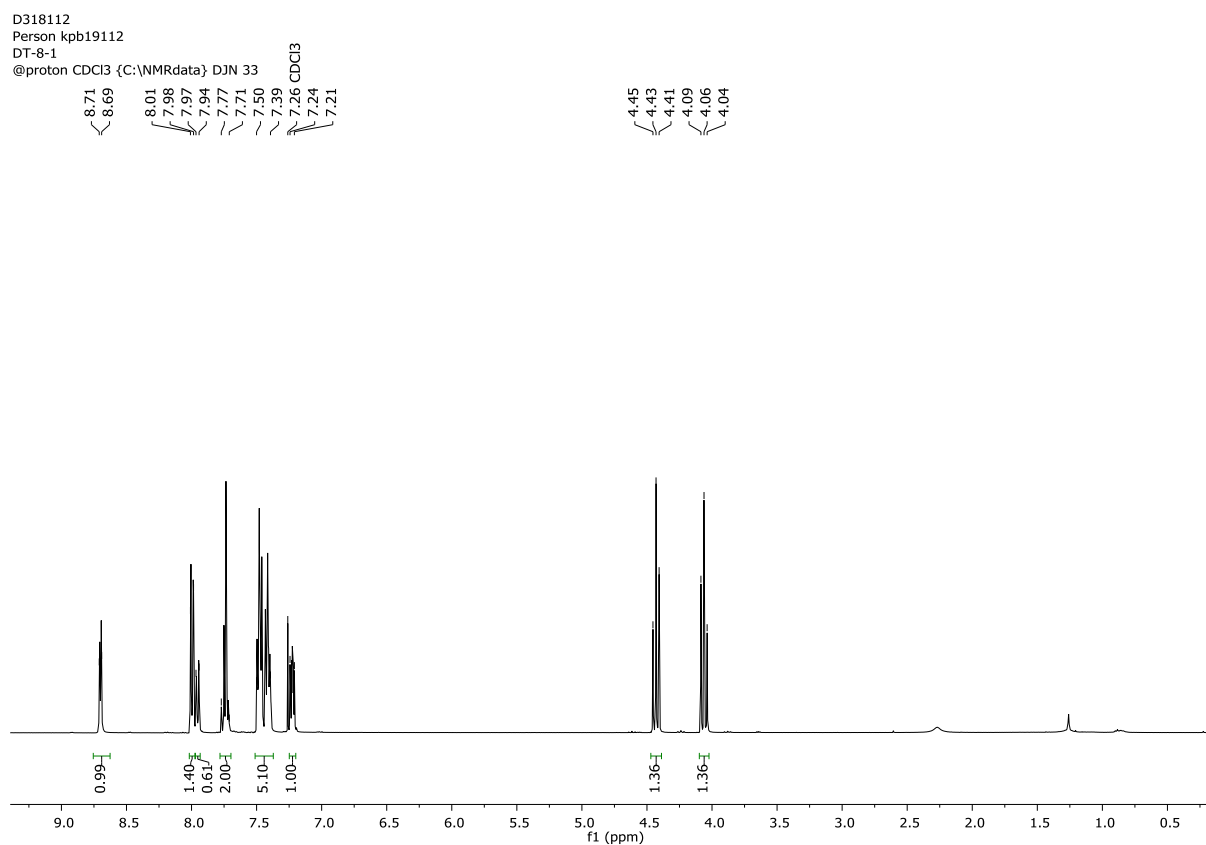

**Figure S66.**  $^1\text{H}$  NMR (400 MHz,  $\text{CDCl}_3$ ) of the competition experiment between 2-phenyloxazoline and 2-phenylpyridine (entry 1, Table S14).

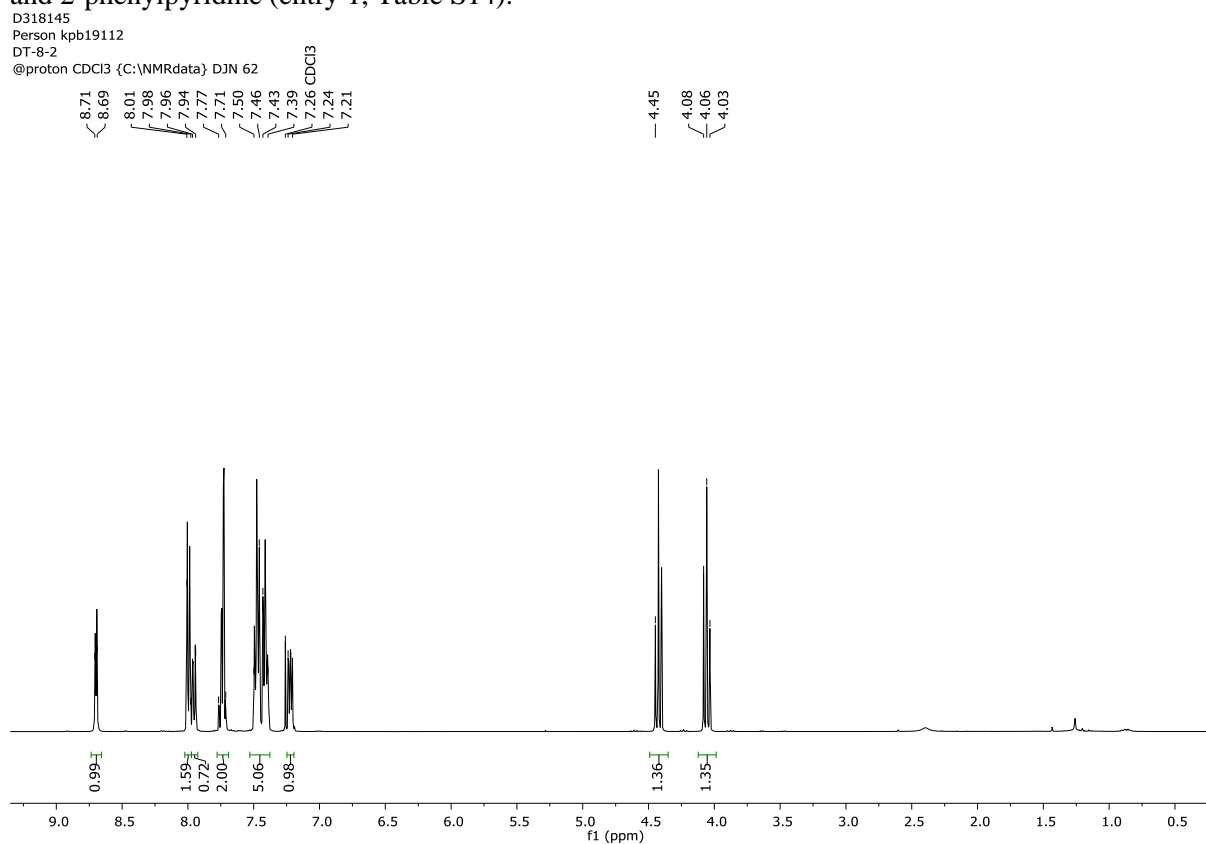

**Figure S67.**  $^1\text{H}$  NMR (400 MHz,  $\text{CDCl}_3$ ) of the competition experiment between 2-phenyloxazoline and 2-phenylpyridine (entry 2, Table S14).

D323955  
 Person kpb19112  
 DT-8-5  
 @proton CDCl3 {C:\NMRdata} DJN 15

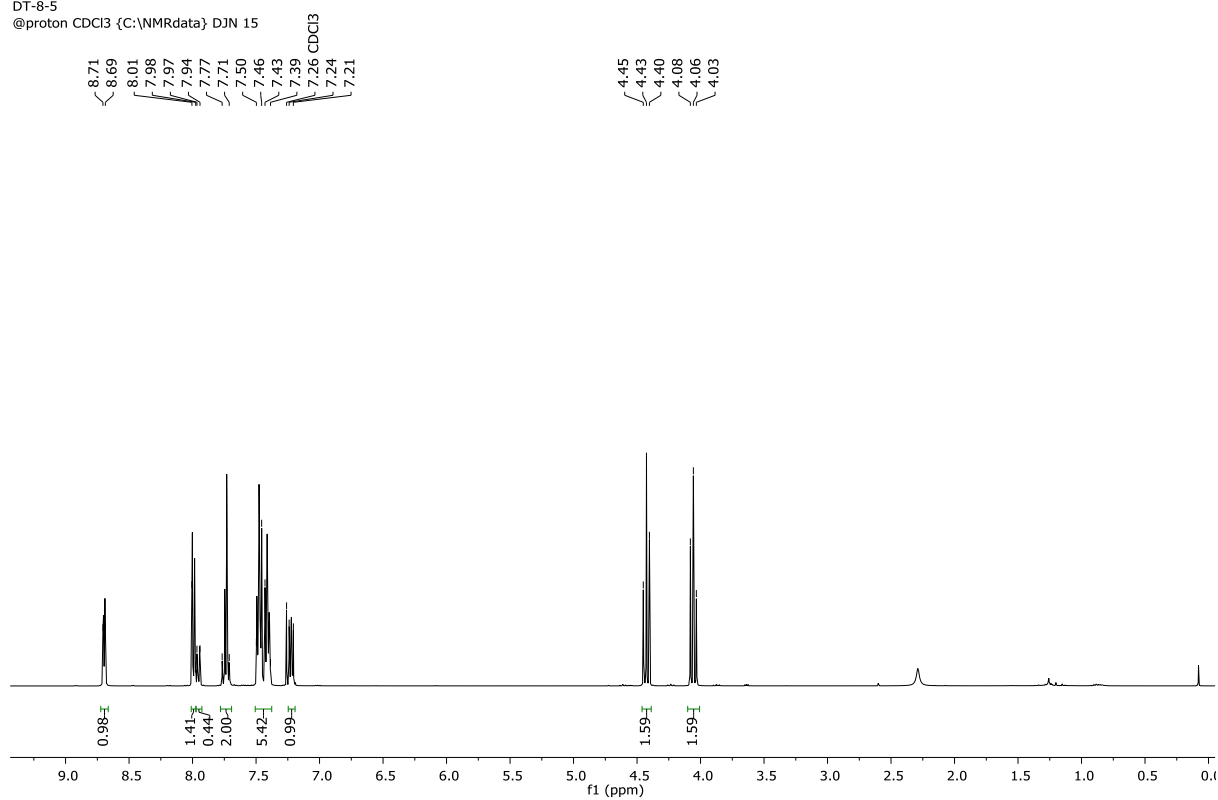

**Figure S68.**  $^1\text{H}$  NMR (400 MHz,  $\text{CDCl}_3$ ) of the competition experiment between 2-phenyloxazoline and 2-phenylpyridine (entry 3, Table S14).

**Table S15.** Determination of the competition rate constant  $\kappa$  from the labelling experiment between 2-phenylthiazole and 1-phenylpyrazole.

|                                                                                                                                                                                                                                                                                                                                                                                                        | Substrate <b>R1</b>                                                               | Substrate <b>R2</b>                                                               | Catalyst                                                             |                       |                       |                  |          |
|--------------------------------------------------------------------------------------------------------------------------------------------------------------------------------------------------------------------------------------------------------------------------------------------------------------------------------------------------------------------------------------------------------|-----------------------------------------------------------------------------------|-----------------------------------------------------------------------------------|----------------------------------------------------------------------|-----------------------|-----------------------|------------------|----------|
|                                                                                                                                                                                                                                                                                                                                                                                                        | 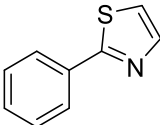 |  | <b>Ir-1</b><br>[(COD)Ir(IMes)PPh <sub>3</sub> ][BArF <sub>24</sub> ] |                       |                       |                  |          |
| <b>Mass</b>                                                                                                                                                                                                                                                                                                                                                                                            | 16.1 mg                                                                           | 14.4 mg                                                                           | 8.7 mg                                                               |                       |                       |                  |          |
| Deuteration expected at $\delta$ ( <b>R1</b> ) = 8.00 – 7.95 ppm and at $\delta$ ( <b>R2</b> ) = 7.76 – 7.66 ppm                                                                                                                                                                                                                                                                                       |                                                                                   |                                                                                   |                                                                      |                       |                       |                  |          |
| Determined against integral at $\delta$ ( <b>R1</b> ) = 7.87 ppm and at $\delta$ ( <b>R2</b> ) = 7.92 ppm                                                                                                                                                                                                                                                                                              |                                                                                   |                                                                                   |                                                                      |                       |                       |                  |          |
| <i>Spectral details of the deuterated reaction mixture:</i>                                                                                                                                                                                                                                                                                                                                            |                                                                                   |                                                                                   |                                                                      |                       |                       |                  |          |
| <sup>1</sup> H NMR (400 MHz, CDCl <sub>3</sub> ) $\delta$ = 8.00 – 7.95 (m, 2H/D <b>R1</b> ), 7.92 (d, $J$ = 2.4 Hz, 1H, <b>R2</b> ), 7.87 (d, $J$ = 3.3 Hz, 1H, <b>R1</b> ), 7.76 – 7.66 (m, 2H/D, <b>R2</b> and 1H, <b>R2</b> ), 7.49 – 7.38 (m, 2H, <b>R2</b> and 3H, <b>R1</b> ), 7.33 (d, $J$ = 3.3 Hz, 1H, <b>R1</b> ), 7.29 (t, $J$ = 7.4 Hz, 1H, <b>R2</b> ), 6.47 – 6.46 (m, 1H, <b>R2</b> ). |                                                                                   |                                                                                   |                                                                      |                       |                       |                  |          |
| Entry                                                                                                                                                                                                                                                                                                                                                                                                  | $I_{R1(t)}$<br>N = 2H                                                             | $I_{R1(0)}$<br>N = 1H                                                             | %D <sub>R1</sub>                                                     | $I_{R2(t)}$<br>N = 2H | $I_{R2(0)}$<br>N = 1H | %D <sub>R2</sub> | $\kappa$ |
| <b>1</b>                                                                                                                                                                                                                                                                                                                                                                                               | 0.74                                                                              | 1.00                                                                              | 63                                                                   | 0.75 <sup>a</sup>     | 1.00                  | 63               | 1.01     |
| <b>2</b>                                                                                                                                                                                                                                                                                                                                                                                               | 0.87                                                                              | 1.00                                                                              | 57                                                                   | 0.90 <sup>b</sup>     | 1.00                  | 55               | 1.04     |
| <b>3</b>                                                                                                                                                                                                                                                                                                                                                                                               | 1.31                                                                              | 1.00                                                                              | 35                                                                   | 1.38 <sup>c</sup>     | 1.00                  | 31               | 1.14     |
| <b>Average <math>\kappa</math> = 1.07</b>                                                                                                                                                                                                                                                                                                                                                              |                                                                                   |                                                                                   |                                                                      |                       |                       |                  |          |
| <sup>a</sup> $I_{R2(t)}$ = 1.75 – 1.00; <sup>b</sup> $I_{R2(t)}$ = 1.90 – 1.00; <sup>c</sup> $I_{R2(t)}$ = 2.38 – 1.00;                                                                                                                                                                                                                                                                                |                                                                                   |                                                                                   |                                                                      |                       |                       |                  |          |

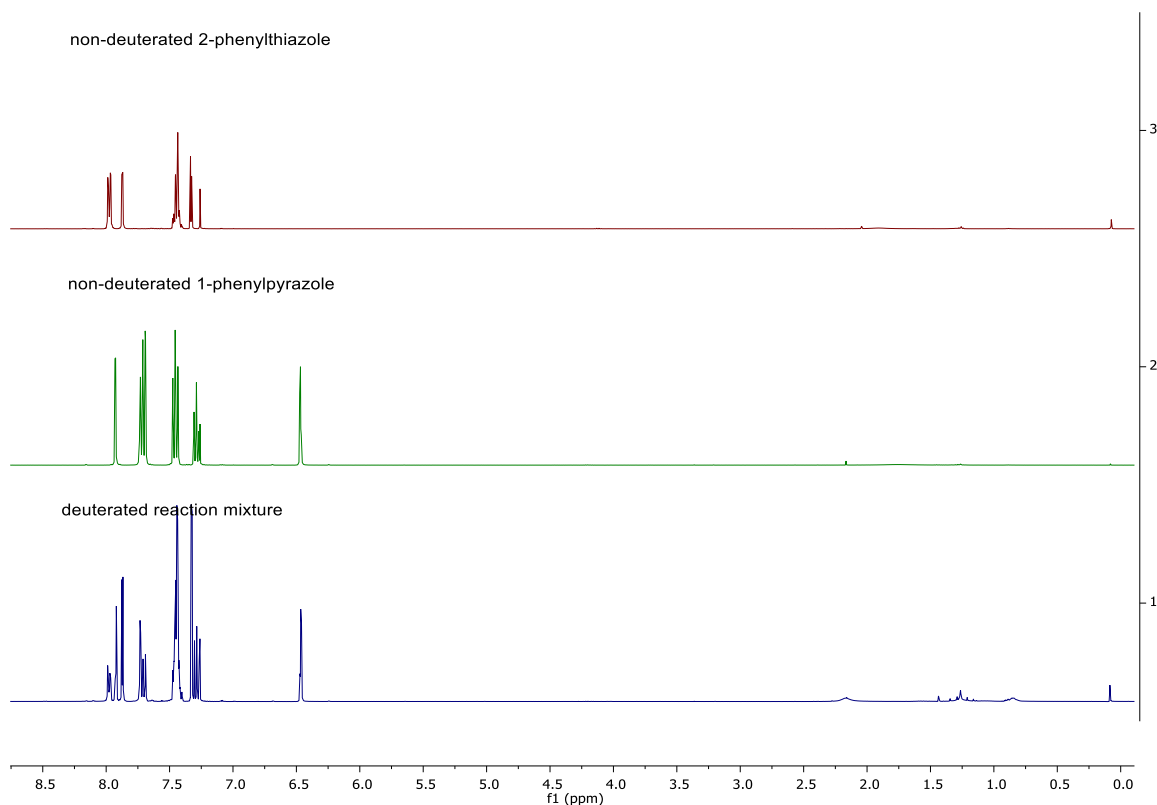

**Figure S69.** Stacked <sup>1</sup>H NMR (400 MHz, CDCl<sub>3</sub>) of non-deuterated substrates and reaction mixture.

D323641  
 Person kpb19112  
 DT-15-4  
 @proton CDCl<sub>3</sub> {C:\NMRdata} DJN 11

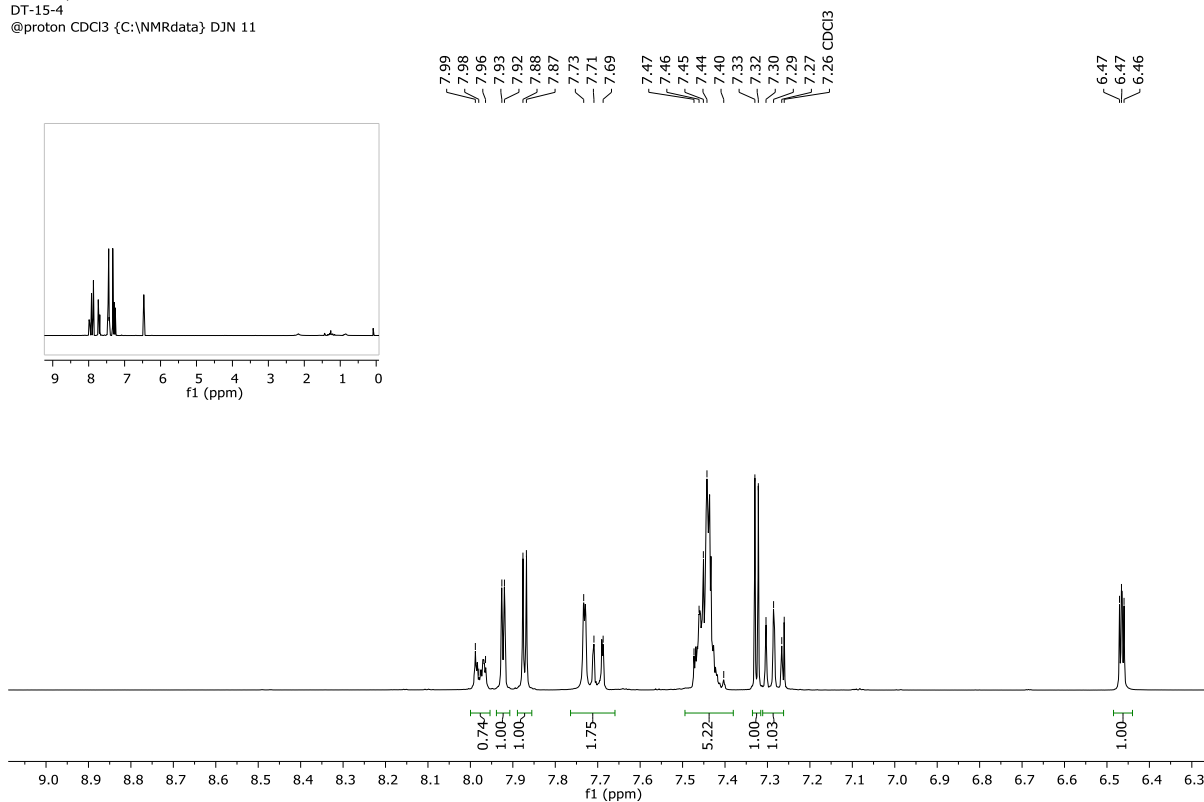

**Figure S70.** <sup>1</sup>H NMR (400 MHz, CDCl<sub>3</sub>) of the competition experiment between 2-phenylthiazole and 1-phenylpyrazole (entry 1, Table S15).

D323642  
 Person kpb19112  
 DT-15-5  
 @proton CDCl<sub>3</sub> {C:\NMRdata} DJN 12

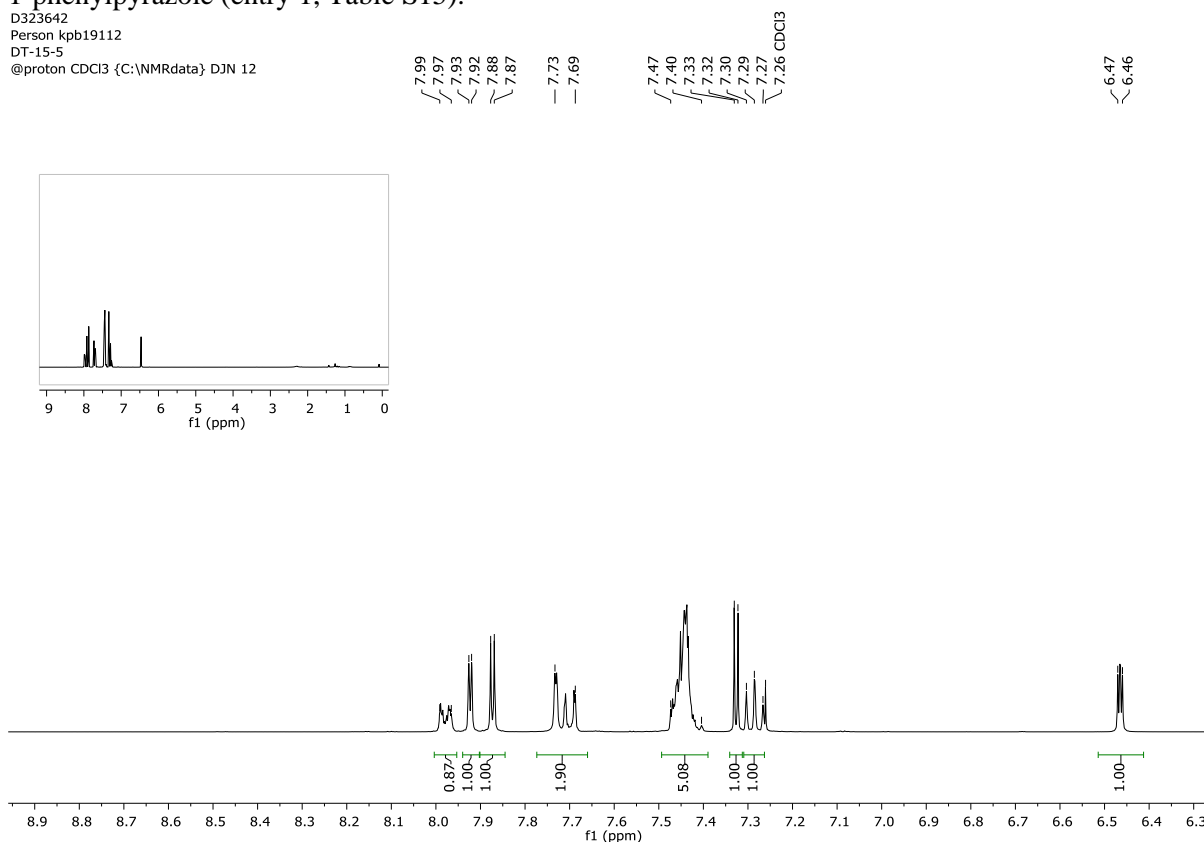

**Figure S71.** <sup>1</sup>H NMR (400 MHz, CDCl<sub>3</sub>) of the competition experiment between 2-phenylthiazole and 1-phenylpyrazole (entry 2, Table S15).

D323643  
 Person kpb19112  
 DT-15-6  
 @proton CDCl3 {C:\NMRdata} DJN 13

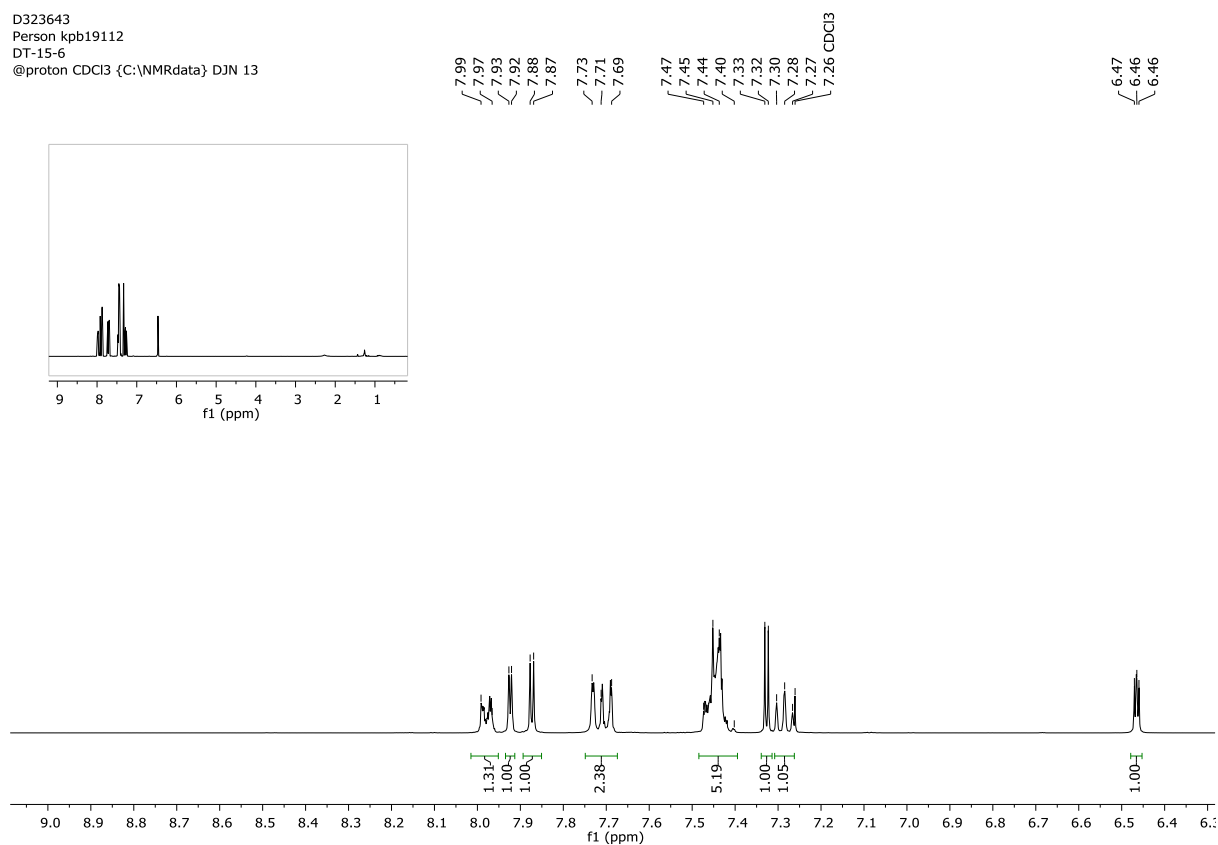

**Figure S72.**  $^1\text{H}$  NMR (400 MHz,  $\text{CDCl}_3$ ) of the competition experiment between 2-phenylthiazole and 1-phenylpyrazole (entry 3, Table S15).



**Table S16.** Determination of the competition rate constant  $\kappa$  from the labelling experiment between 2-phenyloxazoline and 2-phenylthiazoline.

|                                                                                                                                                                                                                                                                                                                        | Substrate <b>R1</b>                                                               | Substrate <b>R2</b>                                                               | Catalyst                                                             |                              |                              |                  |          |
|------------------------------------------------------------------------------------------------------------------------------------------------------------------------------------------------------------------------------------------------------------------------------------------------------------------------|-----------------------------------------------------------------------------------|-----------------------------------------------------------------------------------|----------------------------------------------------------------------|------------------------------|------------------------------|------------------|----------|
|                                                                                                                                                                                                                                                                                                                        | 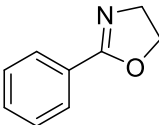 |  | <b>Ir-1</b><br>[(COD)Ir(IMes)PPh <sub>3</sub> ][BArF <sub>24</sub> ] |                              |                              |                  |          |
| Mass                                                                                                                                                                                                                                                                                                                   | 14.7 mg                                                                           | 16.3 mg                                                                           | 8.7 mg                                                               |                              |                              |                  |          |
| Deuteration expected at $\delta$ ( <b>R1</b> ) = 7.98 – 7.93 ppm and at $\delta$ ( <b>R2</b> ) = 7.86 – 7.81 ppm                                                                                                                                                                                                       |                                                                                   |                                                                                   |                                                                      |                              |                              |                  |          |
| Determined against integral at $\delta$ ( <b>R1</b> ) = 4.06 ppm and at $\delta$ ( <b>R2</b> ) = 3.41 ppm                                                                                                                                                                                                              |                                                                                   |                                                                                   |                                                                      |                              |                              |                  |          |
| <i>Spectral details of the deuterated reaction mixture:</i>                                                                                                                                                                                                                                                            |                                                                                   |                                                                                   |                                                                      |                              |                              |                  |          |
| <sup>1</sup> H NMR (400 MHz, CDCl <sub>3</sub> ) $\delta$ = 7.98 – 7.93 (m, 2H/D <b>R1</b> ), 7.86 – 7.81 (m, 2H/D, <b>R2</b> ), 7.51 – 7.36 (m, 3H, <b>R1</b> and 3H, <b>R2</b> ), 4.49 – 4.38 (m, 2H, <b>R1</b> and 2H, <b>R2</b> ), 4.06 (t, $J$ = 9.5 Hz, 2H, <b>R1</b> ), 3.41 (t, $J$ = 8.4 Hz, 2H, <b>R2</b> ). |                                                                                   |                                                                                   |                                                                      |                              |                              |                  |          |
| Entry                                                                                                                                                                                                                                                                                                                  | I <sub>R1(t)</sub><br>N = 2H                                                      | I <sub>R1(0)</sub><br>N = 2H                                                      | %D <sub>R1</sub>                                                     | I <sub>R2(t)</sub><br>N = 2H | I <sub>R2(0)</sub><br>N = 2H | %D <sub>R2</sub> | $\kappa$ |
| <b>1</b>                                                                                                                                                                                                                                                                                                               | 1.05                                                                              | 2.00                                                                              | 48                                                                   | 1.18                         | 2.24                         | 47               | 1.01     |
| <b>2</b>                                                                                                                                                                                                                                                                                                               | 0.87                                                                              | 2.00                                                                              | 57                                                                   | 0.96                         | 2.19                         | 56               | 1.01     |
| <b>3</b>                                                                                                                                                                                                                                                                                                               | 0.73                                                                              | 2.00                                                                              | 64                                                                   | 0.85                         | 2.32                         | 63               | 1.00     |
| Average $\kappa$ = 1.01                                                                                                                                                                                                                                                                                                |                                                                                   |                                                                                   |                                                                      |                              |                              |                  |          |

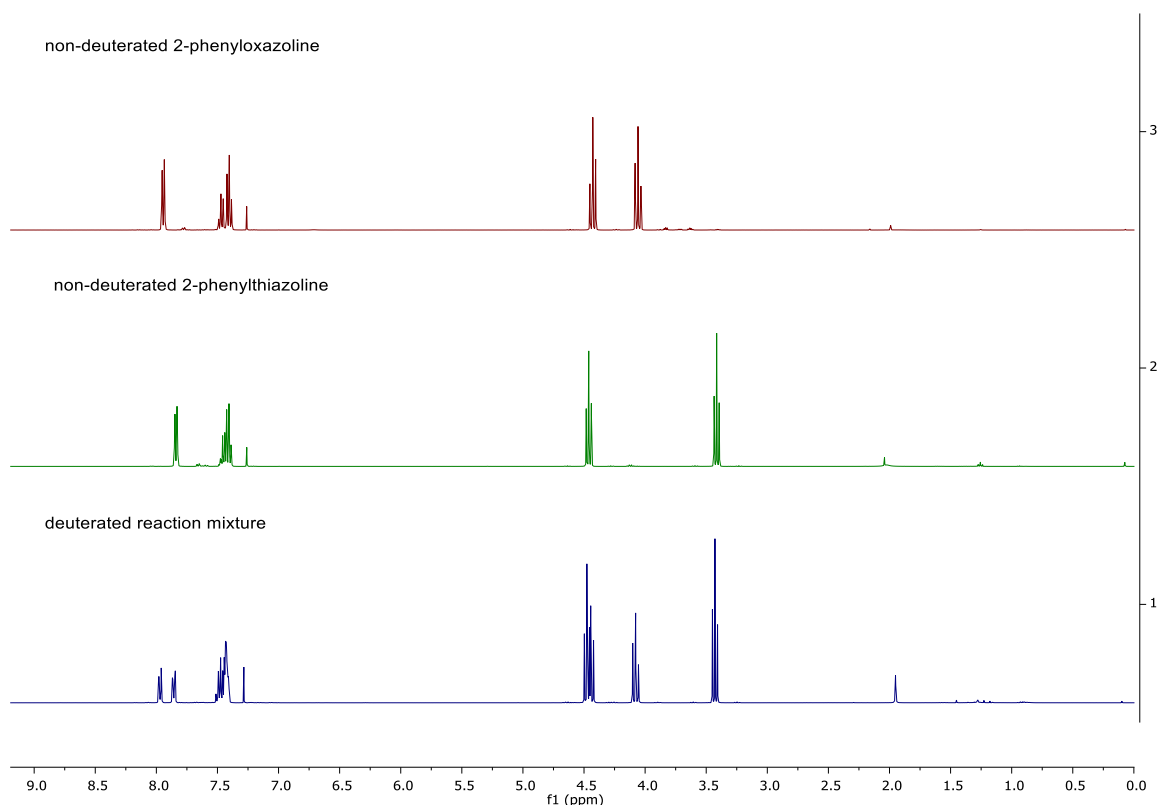

**Figure S73.** Stacked <sup>1</sup>H NMR (400 MHz, CDCl<sub>3</sub>) of non-deuterated substrates and reaction mixture.

D324461  
 Person kpb19112  
 DT-67-1  
 @proton CDCl3 {C:\NMRdata} DJN 21

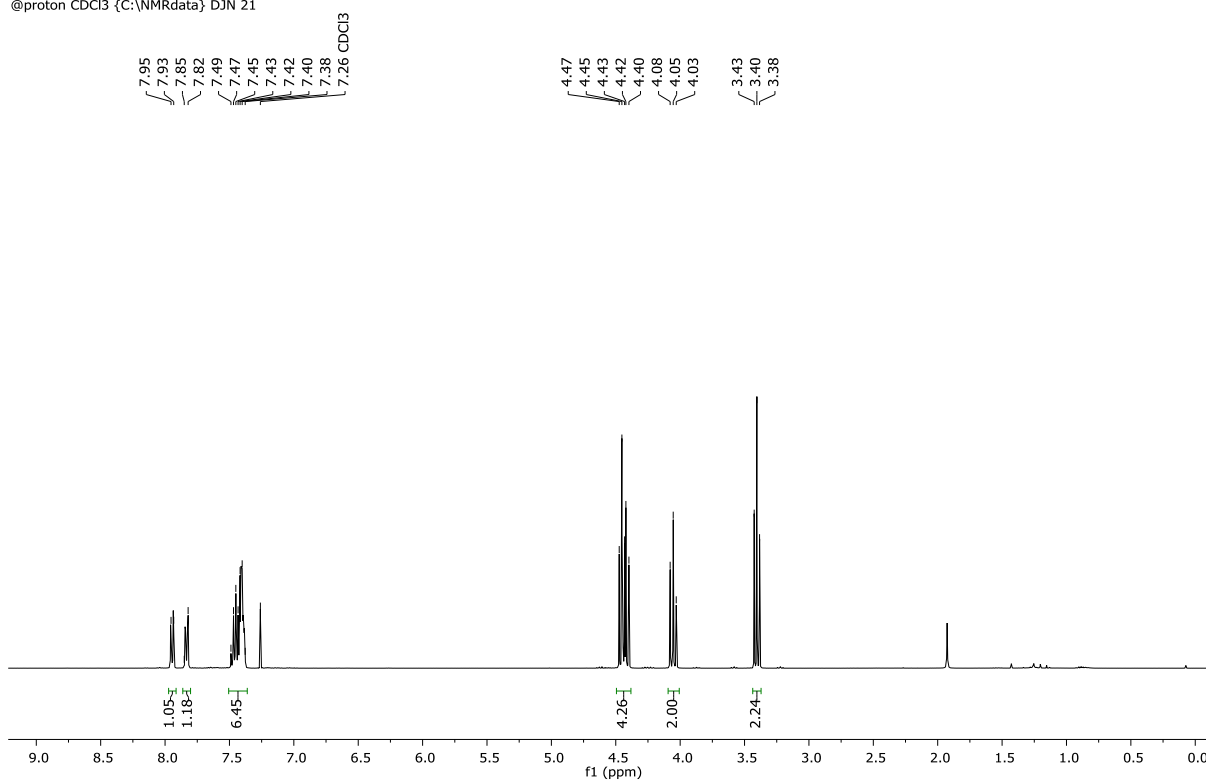

**Figure S74.**  $^1\text{H}$  NMR (400 MHz,  $\text{CDCl}_3$ ) of the competition experiment between 2-phenyloxazoline and 2-phenylthiazoline (entry 1, Table S16).

D324462  
 Person kpb19112  
 DT-67-2  
 @proton CDCl3 {C:\NMRdata} DJN 22

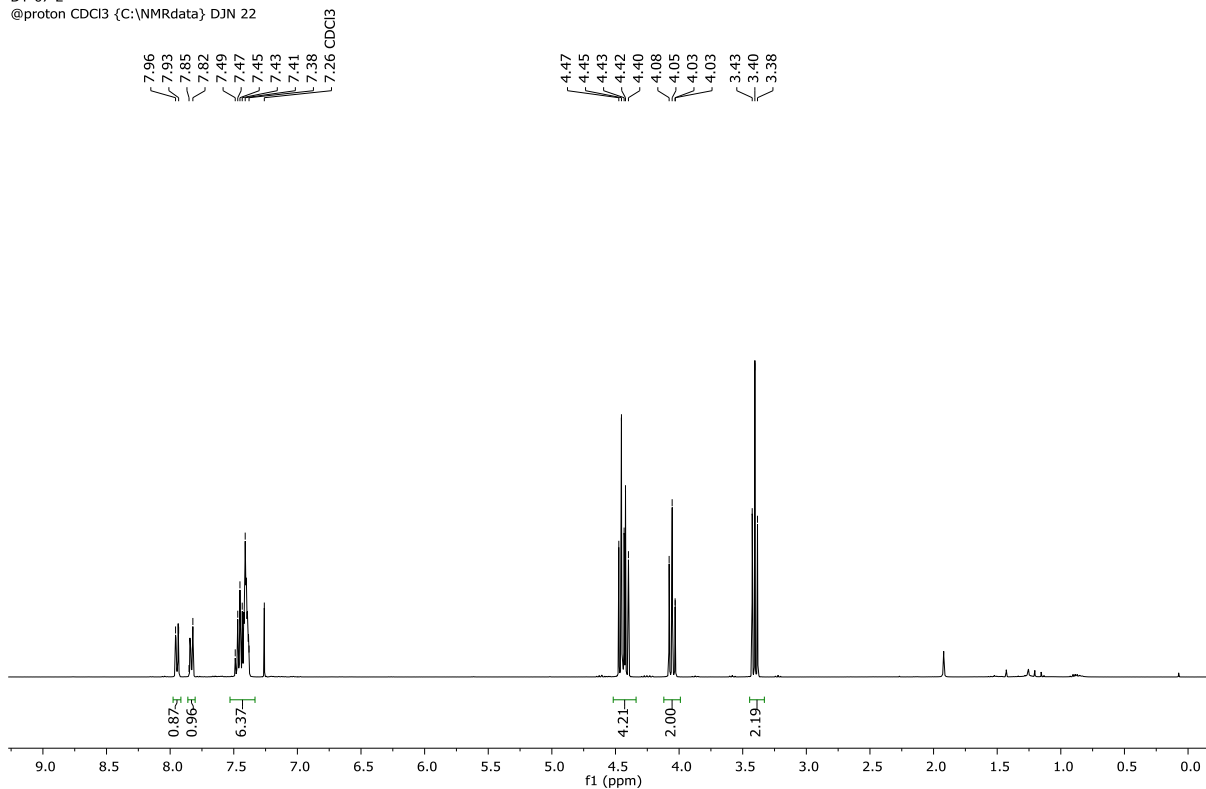

**Figure S75.**  $^1\text{H}$  NMR (400 MHz,  $\text{CDCl}_3$ ) of the competition experiment between 2-phenyloxazoline and 2-phenylthiazoline (entry 2, Table S16).

D324555  
 Person kpb19112  
 DT-67-3  
 @proton CDCl3 {C:\NMRdata} DJN 10

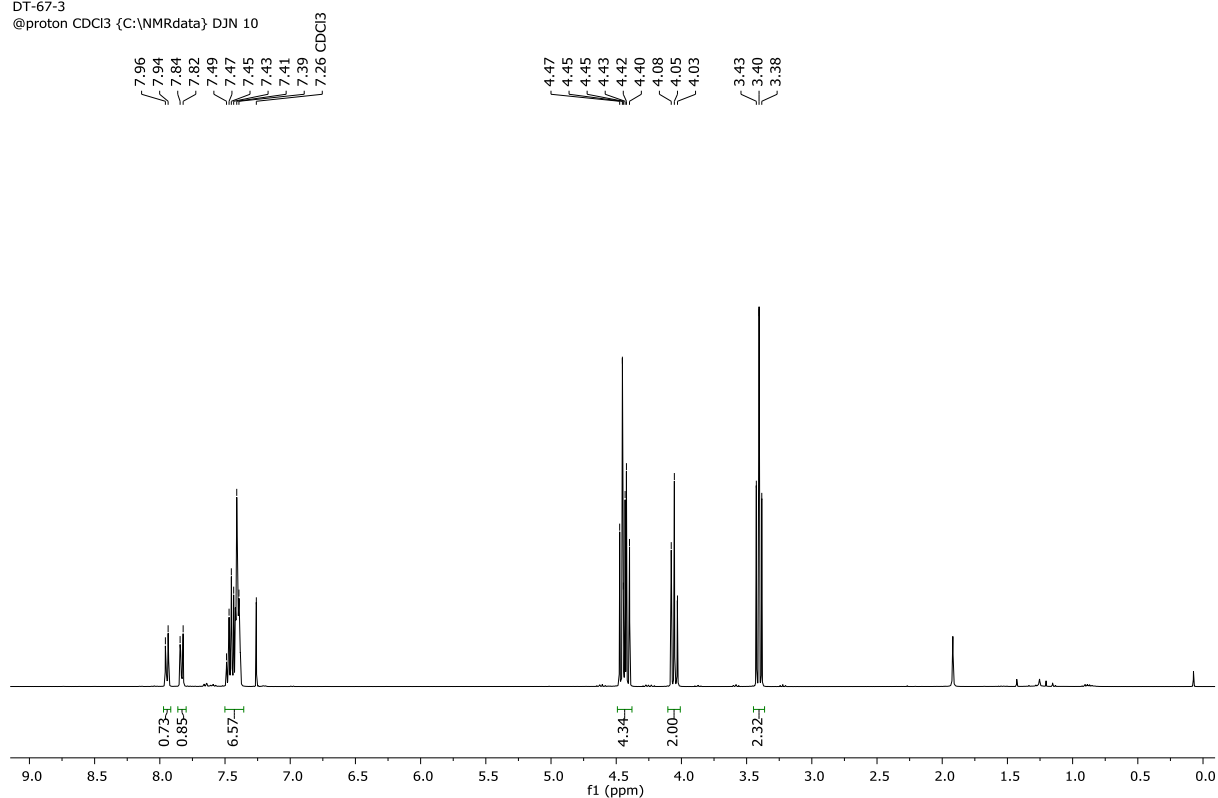

**Figure S76.** <sup>1</sup>H NMR (400 MHz, CDCl<sub>3</sub>) of the competition experiment between 2-phenyloxazoline and 2-phenylthiazoline (entry 3, Table S16).

**Table S17.** Determination of the competition rate constant  $\kappa$  from the labelling experiment between 2-phenylthiazoline and 2-phenylthiazole.

|                                                                                                                                                                                                                                                                                                                               | Substrate <b>R1</b>                                                               | Substrate <b>R2</b>                                                               | Catalyst                                                             |                              |                              |                  |          |
|-------------------------------------------------------------------------------------------------------------------------------------------------------------------------------------------------------------------------------------------------------------------------------------------------------------------------------|-----------------------------------------------------------------------------------|-----------------------------------------------------------------------------------|----------------------------------------------------------------------|------------------------------|------------------------------|------------------|----------|
|                                                                                                                                                                                                                                                                                                                               | 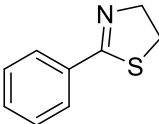 |  | <b>Ir-1</b><br>[(COD)Ir(IMes)PPh <sub>3</sub> ][BArF <sub>24</sub> ] |                              |                              |                  |          |
| Mass                                                                                                                                                                                                                                                                                                                          | 16.3 mg                                                                           | 16.1 mg                                                                           | 8.7 mg                                                               |                              |                              |                  |          |
| Deuteration expected at $\delta$ ( <b>R1</b> ) = 7.89 – 7.21 ppm and at $\delta$ ( <b>R2</b> ) = 8.00 – 7.94 ppm                                                                                                                                                                                                              |                                                                                   |                                                                                   |                                                                      |                              |                              |                  |          |
| Determined against integral at $\delta$ ( <b>R1</b> ) = 4.46 ppm and at $\delta$ ( <b>R2</b> ) = 7.33 ppm                                                                                                                                                                                                                     |                                                                                   |                                                                                   |                                                                      |                              |                              |                  |          |
| <i>Spectral details of the deuterated reaction mixture:</i>                                                                                                                                                                                                                                                                   |                                                                                   |                                                                                   |                                                                      |                              |                              |                  |          |
| <sup>1</sup> H NMR (400 MHz, CDCl <sub>3</sub> ) $\delta$ = 8.00 – 7.94 (m, 2H/D <b>R2</b> ), 7.89 – 7.21 (m, 2H/D, <b>R1</b> and 1H, <b>R2</b> ), 7.49 – 7.37 (m, 3H, <b>R1</b> and 3H, <b>R2</b> ), 7.33 (d, $J$ = 3.3 Hz, 1H, <b>R2</b> ), 4.46 (t, $J$ = 8.3 Hz, 2H, <b>R1</b> ), 3.41 (t, $J$ = 8.3 Hz, 2H, <b>R1</b> ). |                                                                                   |                                                                                   |                                                                      |                              |                              |                  |          |
| Entry                                                                                                                                                                                                                                                                                                                         | I <sub>R1(t)</sub><br>N = 2H                                                      | I <sub>R1(0)</sub><br>N = 2H                                                      | %D <sub>R1</sub>                                                     | I <sub>R2(t)</sub><br>N = 2H | I <sub>R2(0)</sub><br>N = 1H | %D <sub>R2</sub> | $\kappa$ |
| <b>1</b>                                                                                                                                                                                                                                                                                                                      | 0.71 <sup>a</sup>                                                                 | 1.96                                                                              | 64                                                                   | 0.75                         | 1.00                         | 63               | 1.04     |
| <b>2</b>                                                                                                                                                                                                                                                                                                                      | 0.68 <sup>b</sup>                                                                 | 1.95                                                                              | 65                                                                   | 0.71                         | 1.00                         | 65               | 1.02     |
| <b>3</b>                                                                                                                                                                                                                                                                                                                      | 0.75 <sup>c</sup>                                                                 | 1.93                                                                              | 61                                                                   | 0.80                         | 1.00                         | 60               | 1.03     |
| <b>Average <math>\kappa</math> = 1.03</b>                                                                                                                                                                                                                                                                                     |                                                                                   |                                                                                   |                                                                      |                              |                              |                  |          |
| <sup>a</sup> I <sub>R1(t)</sub> = 1.71 – 1.00; <sup>b</sup> I <sub>R1(t)</sub> = 1.68 – 1.00; <sup>c</sup> I <sub>R1(t)</sub> = 1.75 – 1.00;                                                                                                                                                                                  |                                                                                   |                                                                                   |                                                                      |                              |                              |                  |          |

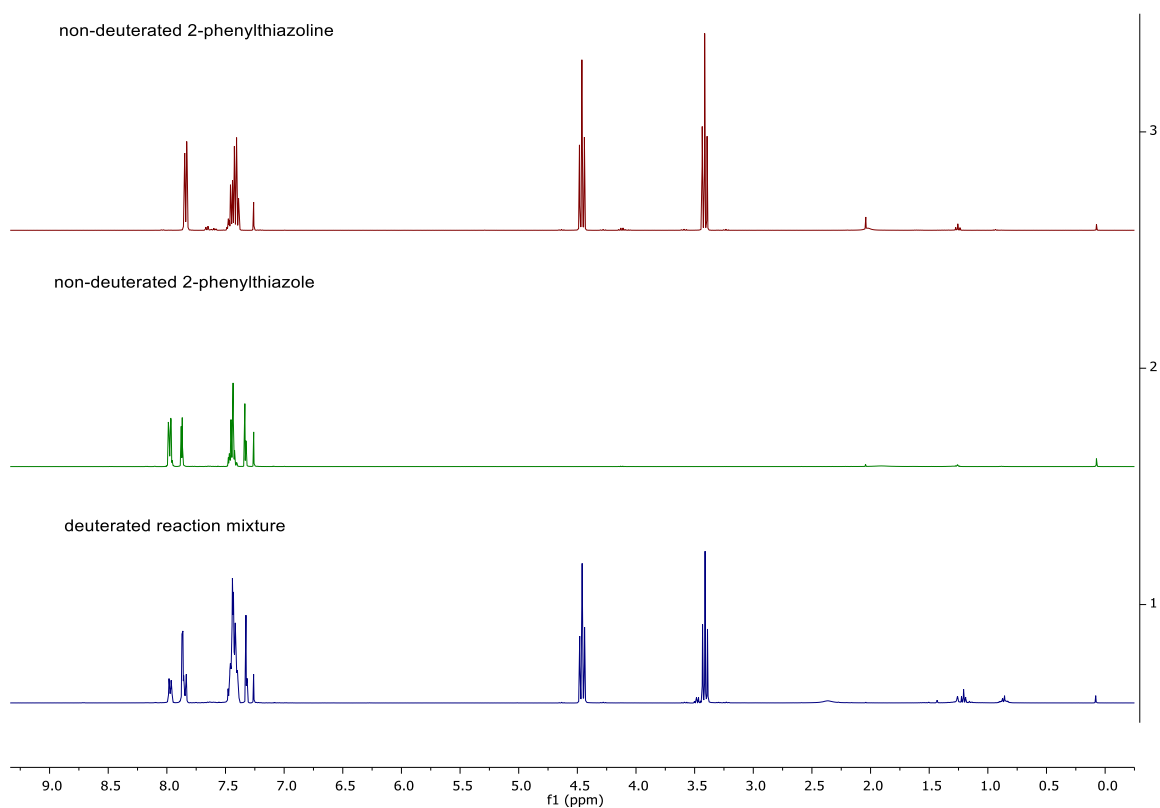

**Figure S77.** Stacked <sup>1</sup>H NMR (400 MHz, CDCl<sub>3</sub>) of non-deuterated substrates and reaction mixture.

D322161  
 Person kpb19112  
 DT-43-1  
 @proton CDCl3 {C:\NMRdata} DJN 15

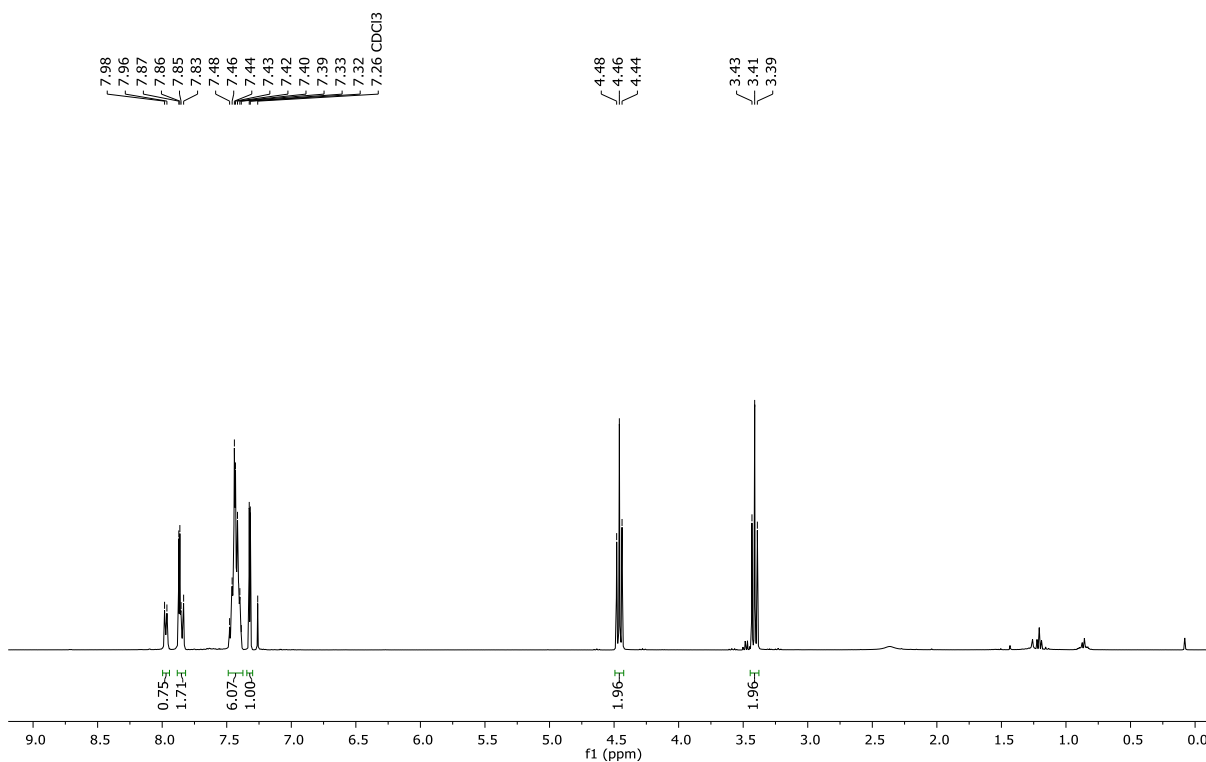

**Figure S78.** <sup>1</sup>H NMR (400 MHz, CDCl<sub>3</sub>) of the competition experiment between 2-phenylthiazoline and 2-phenylthiazole (entry 1, Table S17).

D322241  
 Person kpb19112  
 DT-43-2  
 @proton CDCl3 {C:\NMRdata} DJN 6

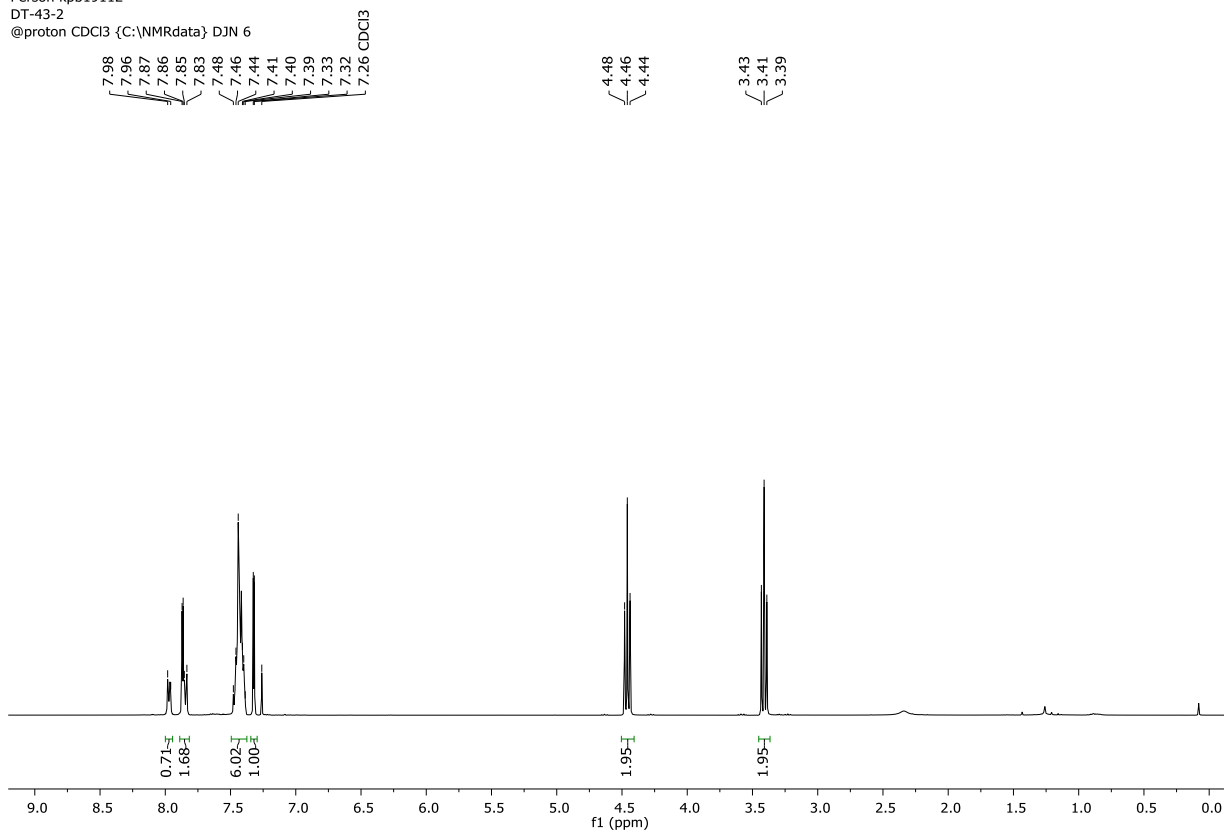

**Figure S79.** <sup>1</sup>H NMR (400 MHz, CDCl<sub>3</sub>) of the competition experiment between 2-phenylthiazoline and 2-phenylthiazole (entry 2, Table S17).

D322242  
Person kpb19112  
DT-43-3  
@proton CDCl3 {C:\NMRdata} DJN 7

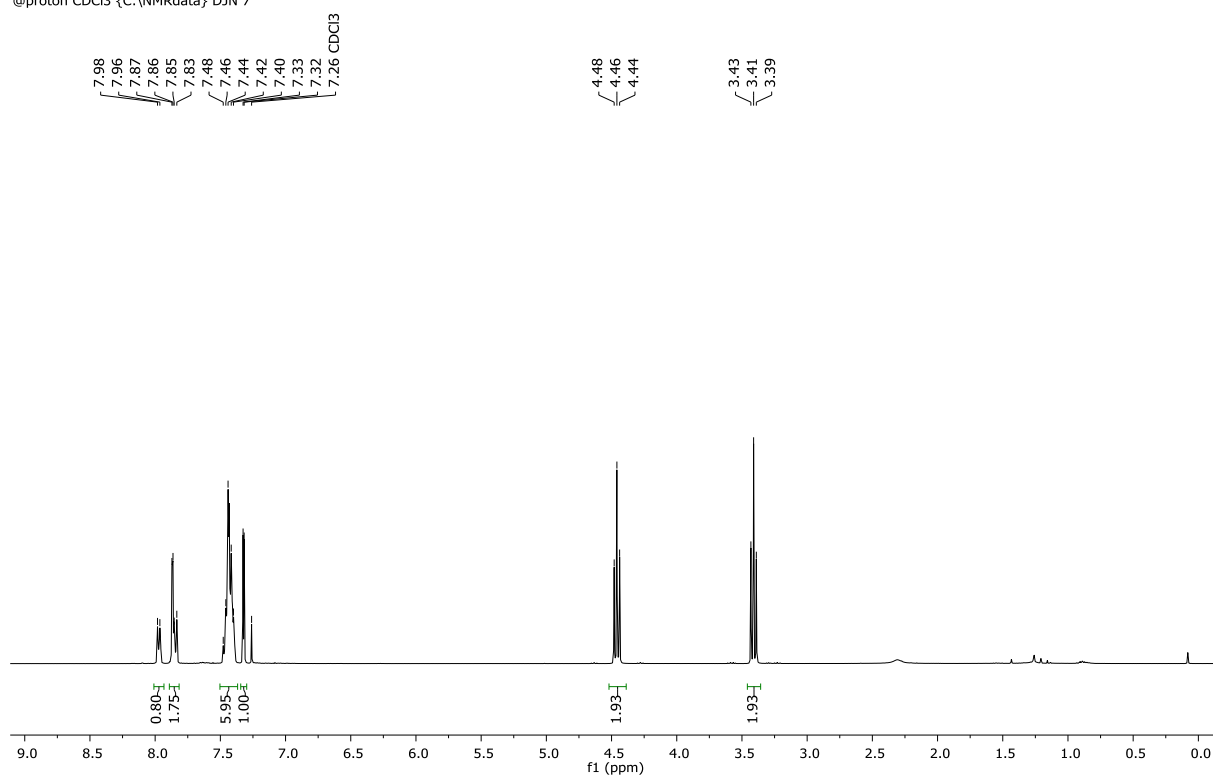

**Figure S80.** <sup>1</sup>H NMR (400 MHz, CDCl<sub>3</sub>) of the competition experiment between 2-phenylthiazoline and 2-phenylthiazole (entry 3, Table S17).

**Table S18.** Determination of the competition rate constant  $\kappa$  from the labelling experiment between 2-phenylthiazole and 2-phenylbenzothiazole.

|                                                                                                                                                                                                                                                                                                  | Substrate <b>R1</b>                                                               | Substrate <b>R2</b>                                                               | Catalyst                                                             |                              |                              |                  |          |
|--------------------------------------------------------------------------------------------------------------------------------------------------------------------------------------------------------------------------------------------------------------------------------------------------|-----------------------------------------------------------------------------------|-----------------------------------------------------------------------------------|----------------------------------------------------------------------|------------------------------|------------------------------|------------------|----------|
|                                                                                                                                                                                                                                                                                                  | 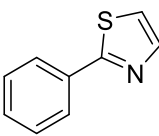 |  | <b>Ir-1</b><br>[(COD)Ir(IMes)PPh <sub>3</sub> ][BArF <sub>24</sub> ] |                              |                              |                  |          |
| Mass                                                                                                                                                                                                                                                                                             | 16.1 mg                                                                           | 21.1 mg                                                                           | 8.7 mg                                                               |                              |                              |                  |          |
| Deuteration expected at $\delta$ ( <b>R1</b> ) = 8.00 – 7.94 ppm and at $\delta$ ( <b>R2</b> ) = 8.14 – 8.06 ppm                                                                                                                                                                                 |                                                                                   |                                                                                   |                                                                      |                              |                              |                  |          |
| Determined against integral at $\delta$ ( <b>R1</b> ) = 7.33 ppm and at $\delta$ ( <b>R2</b> ) = 7.93 – 7.85 ppm                                                                                                                                                                                 |                                                                                   |                                                                                   |                                                                      |                              |                              |                  |          |
| <i>Spectral details of the deuterated reaction mixture:</i>                                                                                                                                                                                                                                      |                                                                                   |                                                                                   |                                                                      |                              |                              |                  |          |
| <sup>1</sup> H NMR (400 MHz, CDCl <sub>3</sub> ) $\delta$ = 8.14 – 8.06 (m, 2H/D, <b>R2</b> and 1H, <b>R2</b> ), 8.00 – 7.94 (m, 2H/D <b>R1</b> ), 7.93 – 7.85 (m, 1H, <b>R1</b> and 1H, <b>R2</b> ), 7.54 – 7.35 (m, 3H, <b>R1</b> and 4H, <b>R2</b> ), 7.33 (d, $J$ = 3.3 Hz, 1H, <b>R1</b> ). |                                                                                   |                                                                                   |                                                                      |                              |                              |                  |          |
| Entry                                                                                                                                                                                                                                                                                            | I <sub>R1(t)</sub><br>N = 2H                                                      | I <sub>R1(0)</sub><br>N = 1H                                                      | %D <sub>R1</sub>                                                     | I <sub>R2(t)</sub><br>N = 2H | I <sub>R2(0)</sub><br>N = 1H | %D <sub>R2</sub> | $\kappa$ |
| <b>1</b>                                                                                                                                                                                                                                                                                         | 0.60                                                                              | 1.00                                                                              | 70                                                                   | 1.83 <sup>a</sup>            | 1.08 <sup>d</sup>            | 15               | 7.26     |
| <b>2</b>                                                                                                                                                                                                                                                                                         | 0.80                                                                              | 1.00                                                                              | 60                                                                   | 2.06 <sup>b</sup>            | 1.16 <sup>e</sup>            | 11               | 7.71     |
| <b>3</b>                                                                                                                                                                                                                                                                                         | 0.57                                                                              | 1.00                                                                              | 72                                                                   | 1.86 <sup>c</sup>            | 1.10 <sup>f</sup>            | 15               | 7.48     |
| <b>Average <math>\kappa</math> = 7.48</b>                                                                                                                                                                                                                                                        |                                                                                   |                                                                                   |                                                                      |                              |                              |                  |          |
| <sup>a</sup> I <sub>R2(t)</sub> = 2.91 – 1.00; <sup>b</sup> I <sub>R2(t)</sub> = 3.22 – 1.00; <sup>c</sup> I <sub>R2(t)</sub> = 2.96 – 1.00;                                                                                                                                                     |                                                                                   |                                                                                   |                                                                      |                              |                              |                  |          |
| <sup>d</sup> I <sub>R2(0)</sub> = 2.08 – 1.00; <sup>e</sup> I <sub>R2(0)</sub> = 2.16 – 1.00; <sup>f</sup> I <sub>R2(0)</sub> = 2.10 – 1.00;                                                                                                                                                     |                                                                                   |                                                                                   |                                                                      |                              |                              |                  |          |

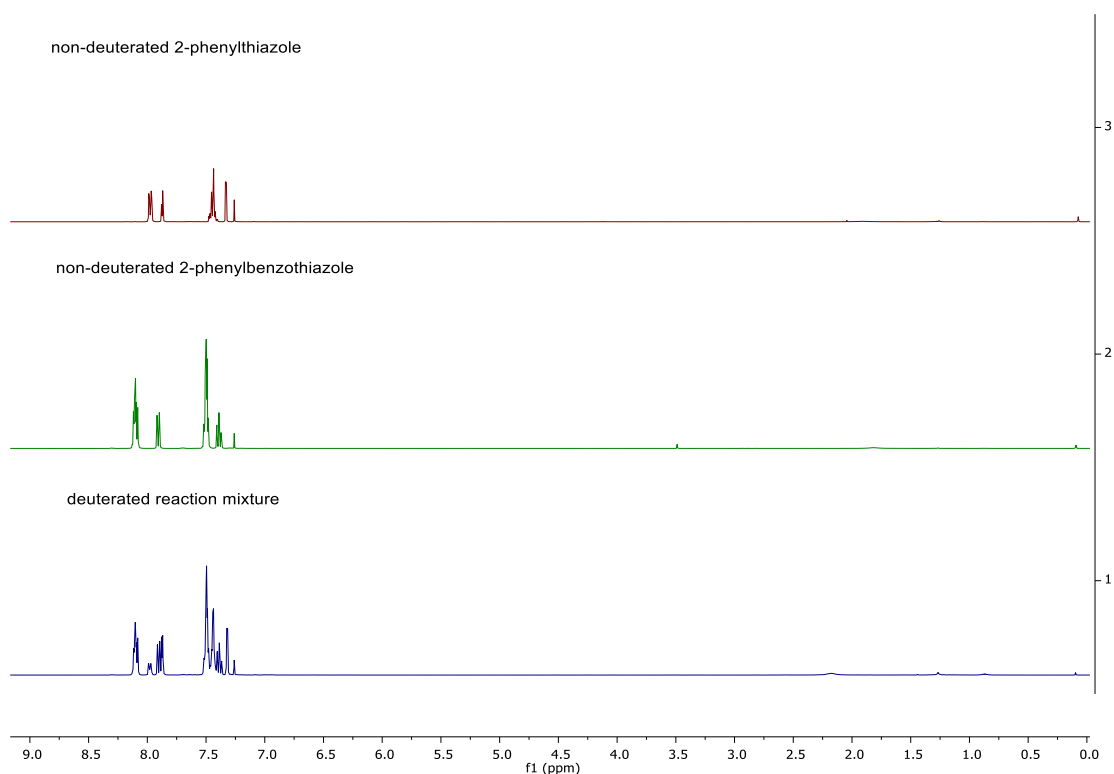

**Figure S81.** Stacked <sup>1</sup>H NMR (400 MHz, CDCl<sub>3</sub>) of non-deuterated substrates and reaction mixture.

D322296  
 Person kpb19112  
 DT-44-2  
 @proton CDCl<sub>3</sub> {C:\NMRdata} DJN 1

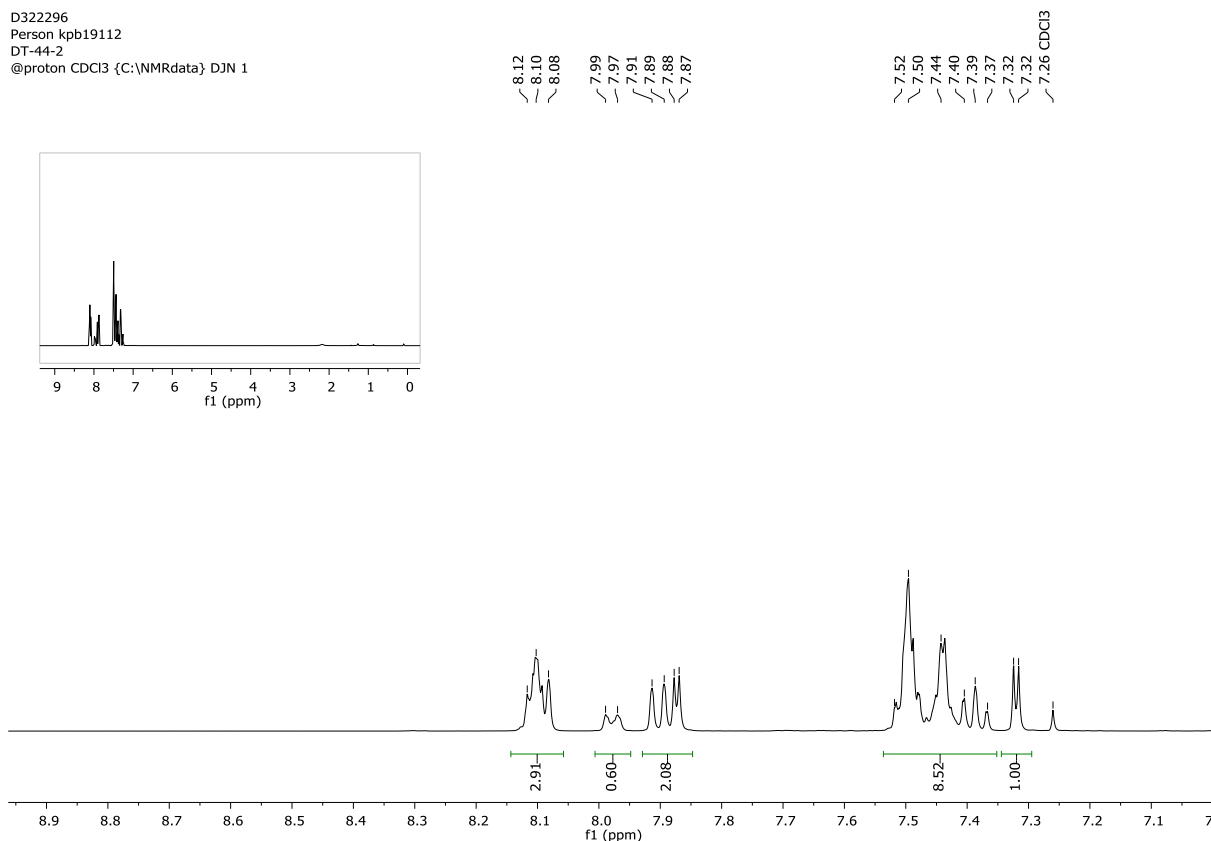

**Figure S82.** <sup>1</sup>H NMR (400 MHz, CDCl<sub>3</sub>) of the competition experiment between 2-phenylthiazole and 2-phenylbenzothiazole (entry 1, Table S18)

D322297  
 Person kpb19112  
 DT-44-3  
 @proton CDCl<sub>3</sub> {C:\NMRdata} DJN 2

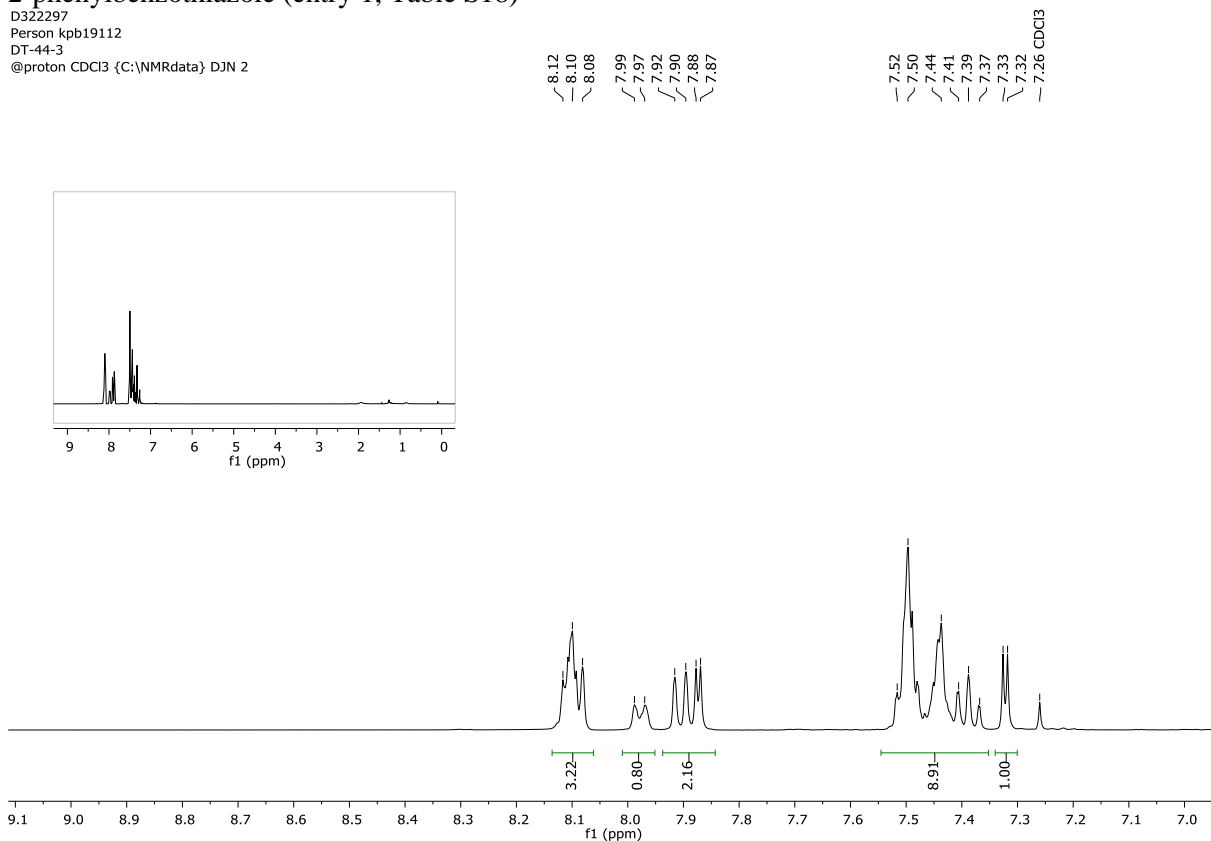

**Figure S83.** <sup>1</sup>H NMR (400 MHz, CDCl<sub>3</sub>) of the competition experiment between 2-phenylthiazole and 2-phenylbenzothiazole (entry 2, Table S18).



D323957  
 Person kpb19112  
 DT-44-6  
 @proton CDCl3 {C:\NMRdata} DJN 17

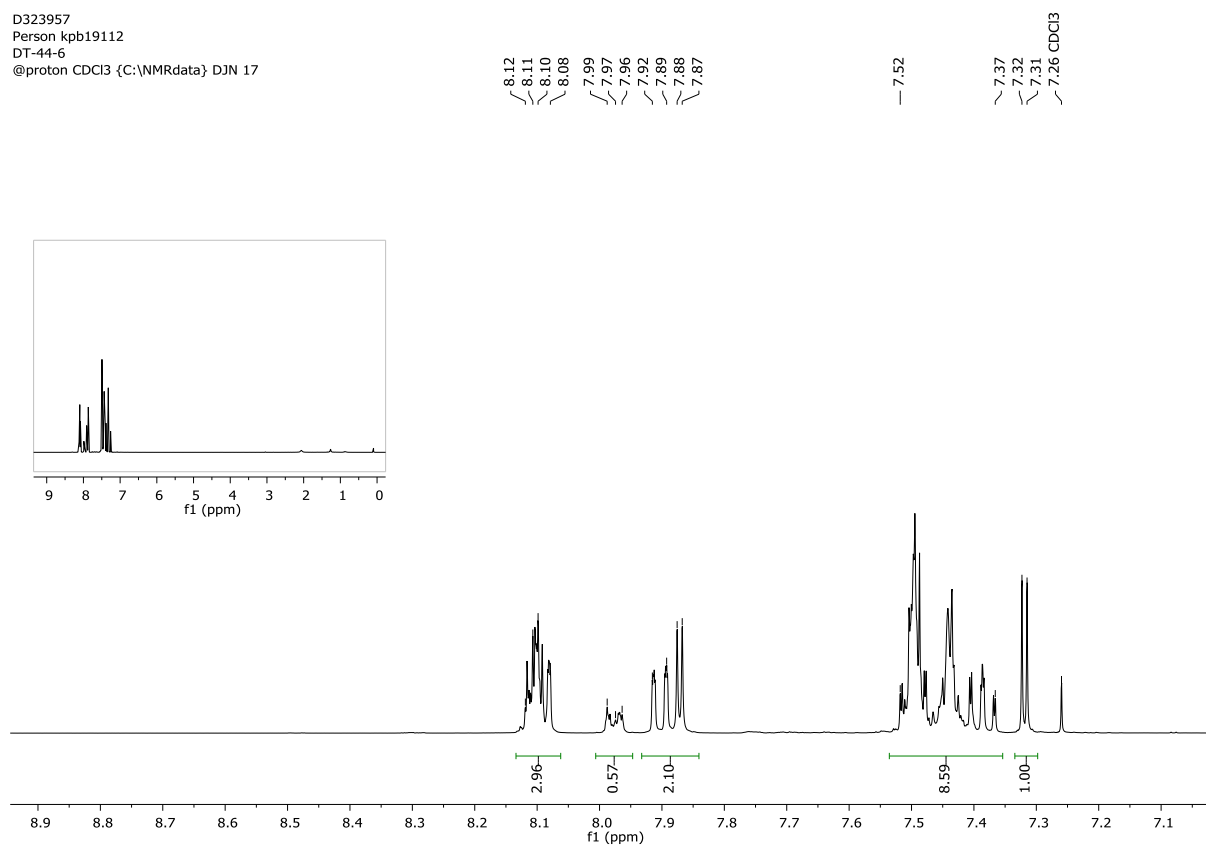

**Figure S84.** <sup>1</sup>H NMR (400 MHz, CDCl<sub>3</sub>) of the competition experiment between 2-phenylthiazole and 2-phenylbenzothiazole (entry 3, Table S18).

**Table S19.** Determination of the competition rate constant  $\kappa$  from the labelling experiment between 2-phenylpyridine and 2-phenylbenzothiazole.

| Substrate <b>R1</b>                                                                                                                                                                                                                                                                                                                       | Substrate <b>R2</b>                                                               | Catalyst                                                             |                  |                              |                              |                  |          |
|-------------------------------------------------------------------------------------------------------------------------------------------------------------------------------------------------------------------------------------------------------------------------------------------------------------------------------------------|-----------------------------------------------------------------------------------|----------------------------------------------------------------------|------------------|------------------------------|------------------------------|------------------|----------|
| 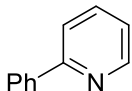                                                                                                                                                                                                                                                         |  | <b>Ir-1</b><br>[(COD)Ir(IMes)PPh <sub>3</sub> ][BArF <sub>24</sub> ] |                  |                              |                              |                  |          |
| <b>Mass</b>                                                                                                                                                                                                                                                                                                                               | 15.5 mg                                                                           | 21.1 mg                                                              | 8.7 mg           |                              |                              |                  |          |
| Deuteration expected at $\delta$ ( <b>R1</b> ) = 8.02 – 7.98 ppm and at $\delta$ ( <b>R2</b> ) = 8.14 – 8.06 ppm                                                                                                                                                                                                                          |                                                                                   |                                                                      |                  |                              |                              |                  |          |
| Determined against integral at $\delta$ ( <b>R1</b> ) = 8.74 – 8.65 ppm and at $\delta$ ( <b>R2</b> ) = 7.93 – 7.85 ppm                                                                                                                                                                                                                   |                                                                                   |                                                                      |                  |                              |                              |                  |          |
| <i>Spectral details of the deuterated reaction mixture:</i>                                                                                                                                                                                                                                                                               |                                                                                   |                                                                      |                  |                              |                              |                  |          |
| <sup>1</sup> H NMR (400 MHz, CDCl <sub>3</sub> ) $\delta$ = 8.74 – 8.65 (m, 1H, <b>R1</b> ), 8.14 – 8.06 (m, 2H/D, <b>R2</b> and 1H, <b>R2</b> ), 8.02 – 7.98 (m, 2H/D <b>R1</b> ), 7.93 – 7.85 (m, 1H, <b>R2</b> ), 7.77 – 7.71 (m, 2H, <b>R1</b> ), 7.53 – 7.35 (m, 3H, <b>R1</b> and 4H, <b>R2</b> ), 7.25 – 7.20 (m, 1H, <b>R1</b> ). |                                                                                   |                                                                      |                  |                              |                              |                  |          |
| Entry                                                                                                                                                                                                                                                                                                                                     | I <sub>R1(t)</sub><br>N = 2H                                                      | I <sub>R1(0)</sub><br>N = 1H                                         | %D <sub>R1</sub> | I <sub>R2(t)</sub><br>N = 2H | I <sub>R2(0)</sub><br>N = 1H | %D <sub>R2</sub> | $\kappa$ |
| <b>1</b>                                                                                                                                                                                                                                                                                                                                  | 1.58                                                                              | 1.00                                                                 | 21               | 1.98 <sup>a</sup>            | 1.06                         | 7                | 3.45     |
| <b>2</b>                                                                                                                                                                                                                                                                                                                                  | 1.60                                                                              | 1.00                                                                 | 20               | 2.12 <sup>b</sup>            | 1.12                         | 5                | 4.05     |
| <b>3</b>                                                                                                                                                                                                                                                                                                                                  | 1.53                                                                              | 1.00                                                                 | 24               | 2.02 <sup>c</sup>            | 1.09                         | 7                | 3.51     |
| <b>Average <math>\kappa</math> = 3.67</b>                                                                                                                                                                                                                                                                                                 |                                                                                   |                                                                      |                  |                              |                              |                  |          |
| <sup>a</sup> I <sub>R2(t)</sub> = 3.04 – 1.06; <sup>b</sup> I <sub>R2(t)</sub> = 3.24 – 1.12; <sup>c</sup> I <sub>R2(t)</sub> = 3.11 – 1.09;                                                                                                                                                                                              |                                                                                   |                                                                      |                  |                              |                              |                  |          |

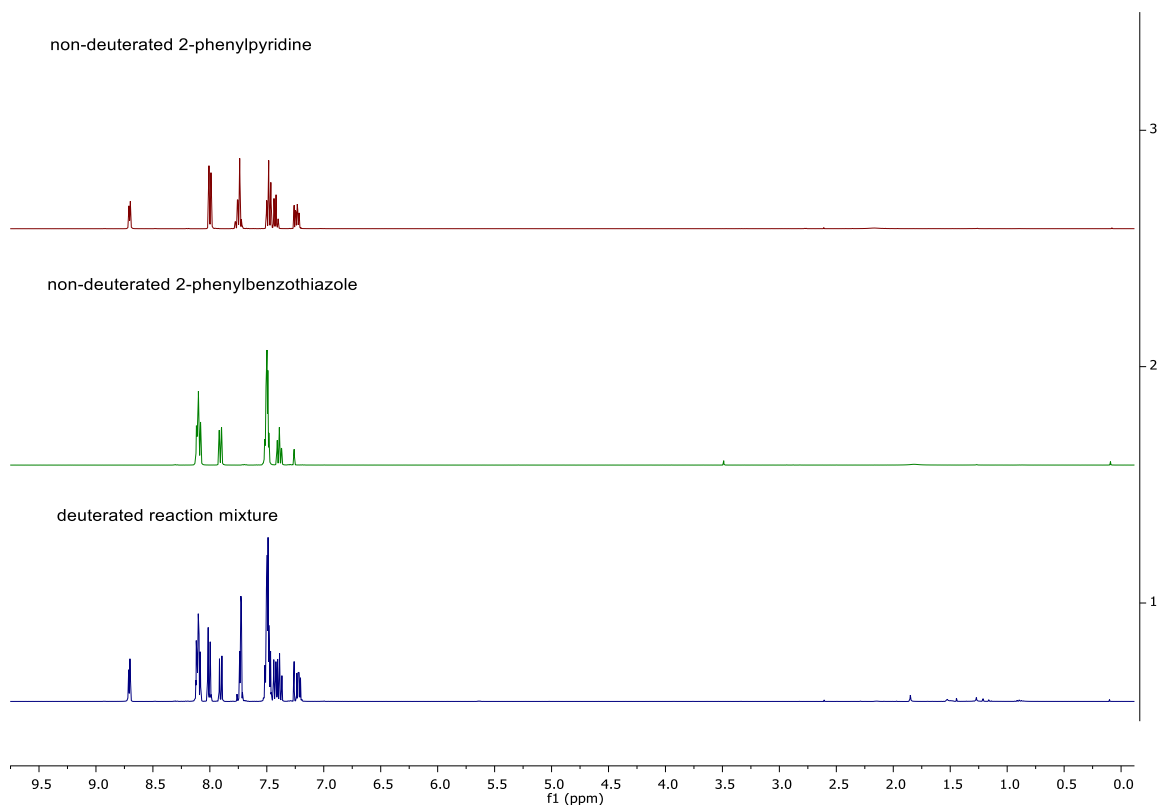

**Figure S85.** Stacked <sup>1</sup>H NMR (400 MHz, CDCl<sub>3</sub>) of non-deuterated substrates and reaction mixture.

D324638  
 Person kpb19112  
 DT-70-1  
 @proton CDCl3 {C:\NMRdata} DJN 18

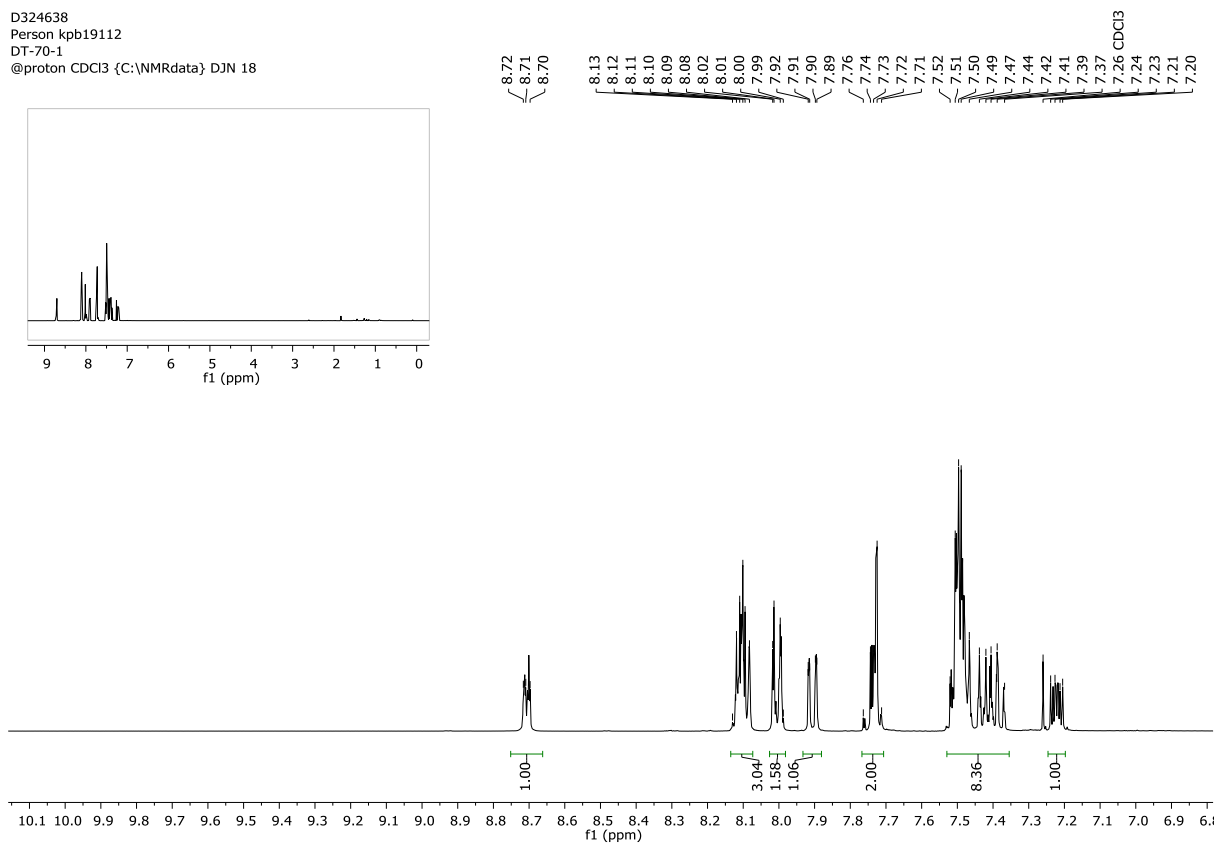

**Figure S86.**  $^1\text{H}$  NMR (400 MHz,  $\text{CDCl}_3$ ) of the competition experiment between 2-phenylpyridine and 2-phenylbenzothiazole (entry 1, Table S19).

D324639  
 Person kpb19112  
 DT-70-2  
 @proton CDCl3 {C:\NMRdata} DJN 19

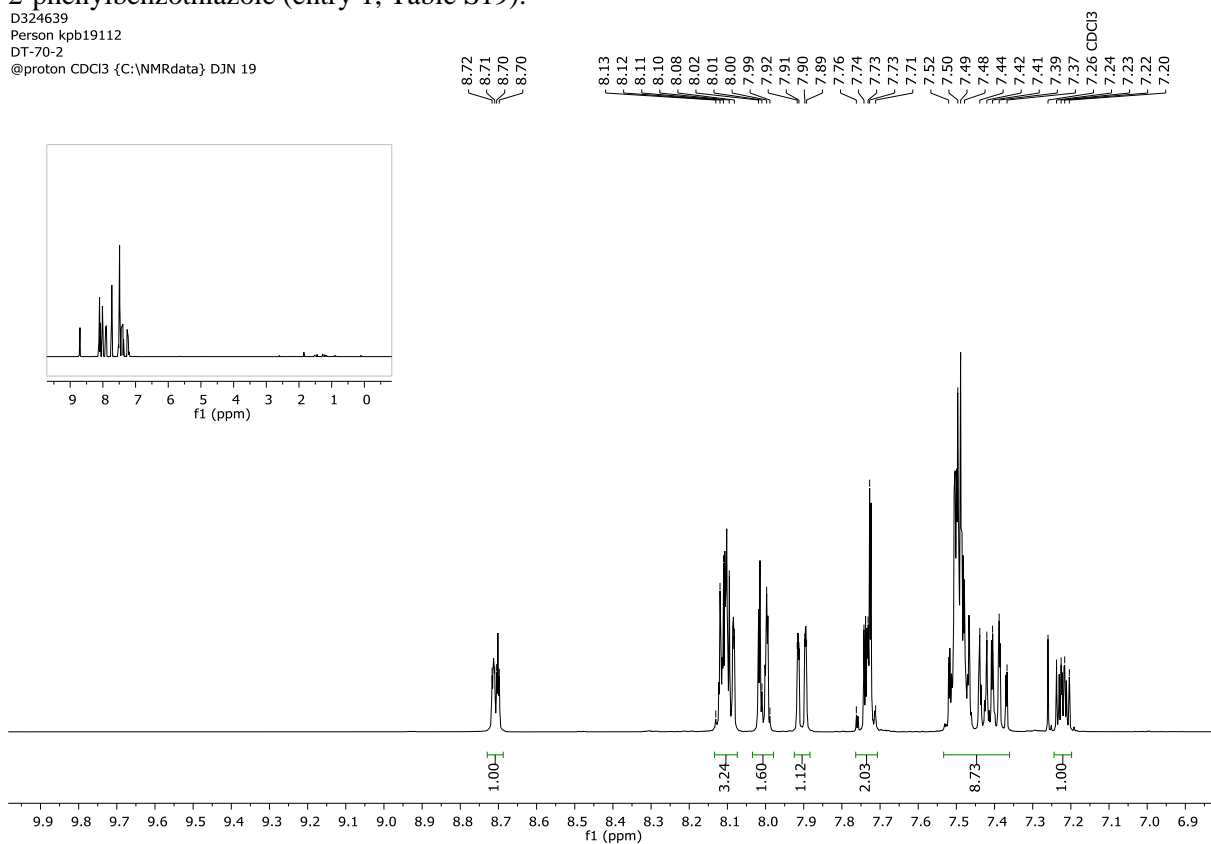

**Figure S87.**  $^1\text{H}$  NMR (400 MHz,  $\text{CDCl}_3$ ) of the competition experiment between 2-phenylpyridine and 2-phenylbenzothiazole (entry 2, Table S19).

D326710  
 Person kpb19112  
 DT-70-3  
 @proton CDCl3 {C:\NMRdata} DJN 16

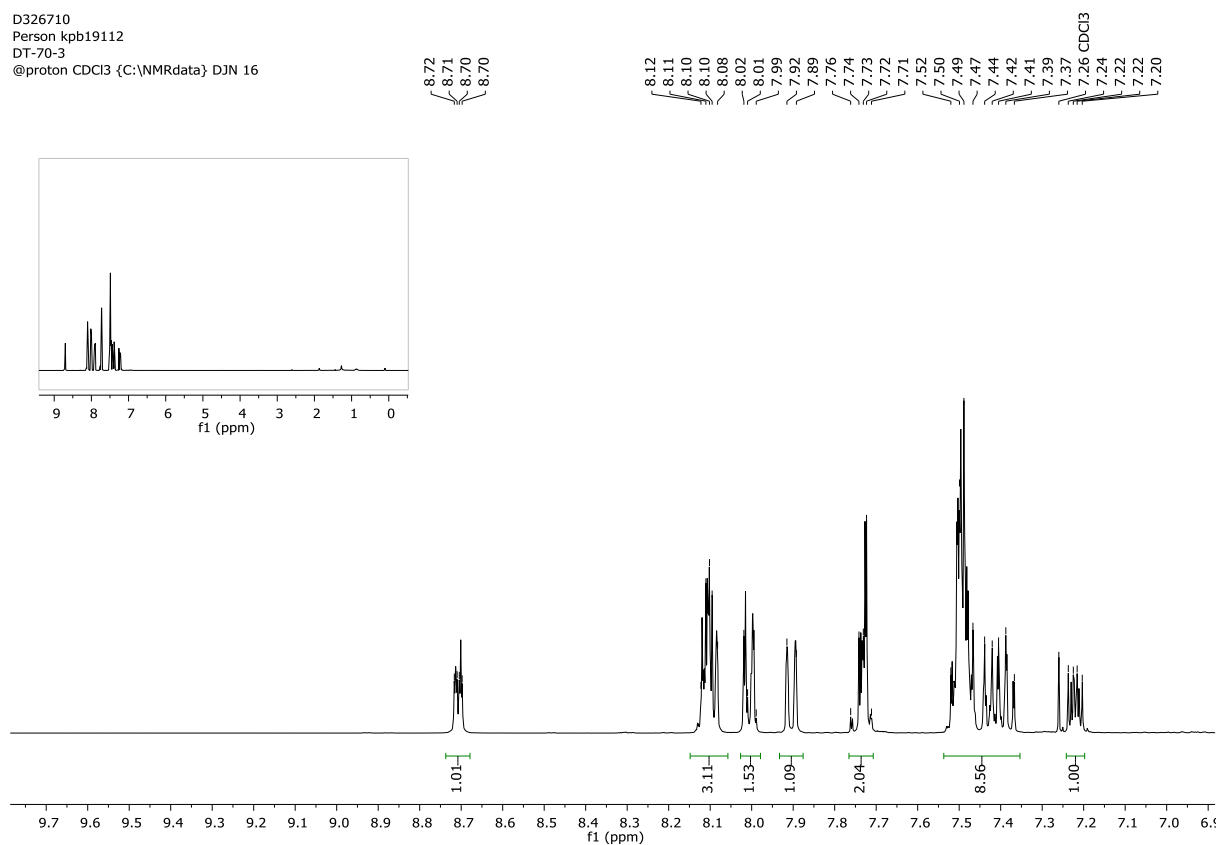

**Figure S88.**  $^1\text{H}$  NMR (400 MHz,  $\text{CDCl}_3$ ) of the competition experiment between 2-phenylpyridine and 2-phenylbenzothiazole (entry 3, Table S19).

**Table S20.** Determination of the competition rate constant  $\kappa$  from the labelling experiment between 1-methyl-2-phenylimidazole and 2-phenylthiazoline.

|                                                                                                                                                                                                                                                                                                                                                                            | Substrate <b>R1</b>                                                               | Substrate <b>R2</b>                                                               | Catalyst                                                             |                              |                              |                  |          |
|----------------------------------------------------------------------------------------------------------------------------------------------------------------------------------------------------------------------------------------------------------------------------------------------------------------------------------------------------------------------------|-----------------------------------------------------------------------------------|-----------------------------------------------------------------------------------|----------------------------------------------------------------------|------------------------------|------------------------------|------------------|----------|
|                                                                                                                                                                                                                                                                                                                                                                            | 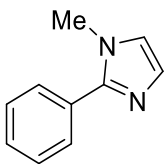 |  | <b>Ir-1</b><br>[(COD)Ir(IMes)PPh <sub>3</sub> ][BArF <sub>24</sub> ] |                              |                              |                  |          |
| Mass                                                                                                                                                                                                                                                                                                                                                                       | 15.8 mg                                                                           | 16.3 mg                                                                           | 8.7 mg                                                               |                              |                              |                  |          |
| Deuteration expected at $\delta$ ( <b>R1</b> ) = 7.65 – 7.60 ppm and at $\delta$ ( <b>R2</b> ) = 7.85 – 7.80 ppm                                                                                                                                                                                                                                                           |                                                                                   |                                                                                   |                                                                      |                              |                              |                  |          |
| Determined against integral at $\delta$ ( <b>R1</b> ) = 7.12 ppm and at $\delta$ ( <b>R2</b> ) = 4.45 ppm                                                                                                                                                                                                                                                                  |                                                                                   |                                                                                   |                                                                      |                              |                              |                  |          |
| <i>Spectral details of the deuterated reaction mixture:</i>                                                                                                                                                                                                                                                                                                                |                                                                                   |                                                                                   |                                                                      |                              |                              |                  |          |
| <sup>1</sup> H NMR (400 MHz, CDCl <sub>3</sub> ) $\delta$ = 7.85 – 7.80 (m, 2H/D <b>R2</b> ), 7.65 – 7.60 (m, 2H/D, <b>R1</b> ), 7.48 – 7.36 (m, 3H, <b>R1</b> and 3H, <b>R2</b> ), 7.12 (d, $J$ =1.2 Hz, 1H, <b>R1</b> ), 6.95 (d, $J$ =1.2 Hz, 1H, <b>R1</b> ), 4.45 (t, $J$ = 8.3 Hz, 2H, <b>R2</b> ), 3.73 (s, 3H, <b>R1</b> ), 3.40 (t, $J$ = 8.3 Hz, 2H, <b>R2</b> ) |                                                                                   |                                                                                   |                                                                      |                              |                              |                  |          |
| Entry                                                                                                                                                                                                                                                                                                                                                                      | I <sub>R1(t)</sub><br>N = 2H                                                      | I <sub>R1(0)</sub><br>N = 1H                                                      | %D <sub>R1</sub>                                                     | I <sub>R2(t)</sub><br>N = 2H | I <sub>R2(0)</sub><br>N = 2H | %D <sub>R2</sub> | $\kappa$ |
| <b>1</b>                                                                                                                                                                                                                                                                                                                                                                   | 0.62                                                                              | 1.00                                                                              | 69                                                                   | 1.72                         | 2.24                         | 23               | 4.43     |
| <b>2</b>                                                                                                                                                                                                                                                                                                                                                                   | 0.60                                                                              | 1.00                                                                              | 70                                                                   | 2.06                         | 2.52                         | 18               | 5.97     |
| <b>3</b>                                                                                                                                                                                                                                                                                                                                                                   | 1.02                                                                              | 1.00                                                                              | 49                                                                   | 1.91                         | 2.36                         | 19               | 3.18     |
| <b>Average <math>\kappa</math> = 4.53</b>                                                                                                                                                                                                                                                                                                                                  |                                                                                   |                                                                                   |                                                                      |                              |                              |                  |          |

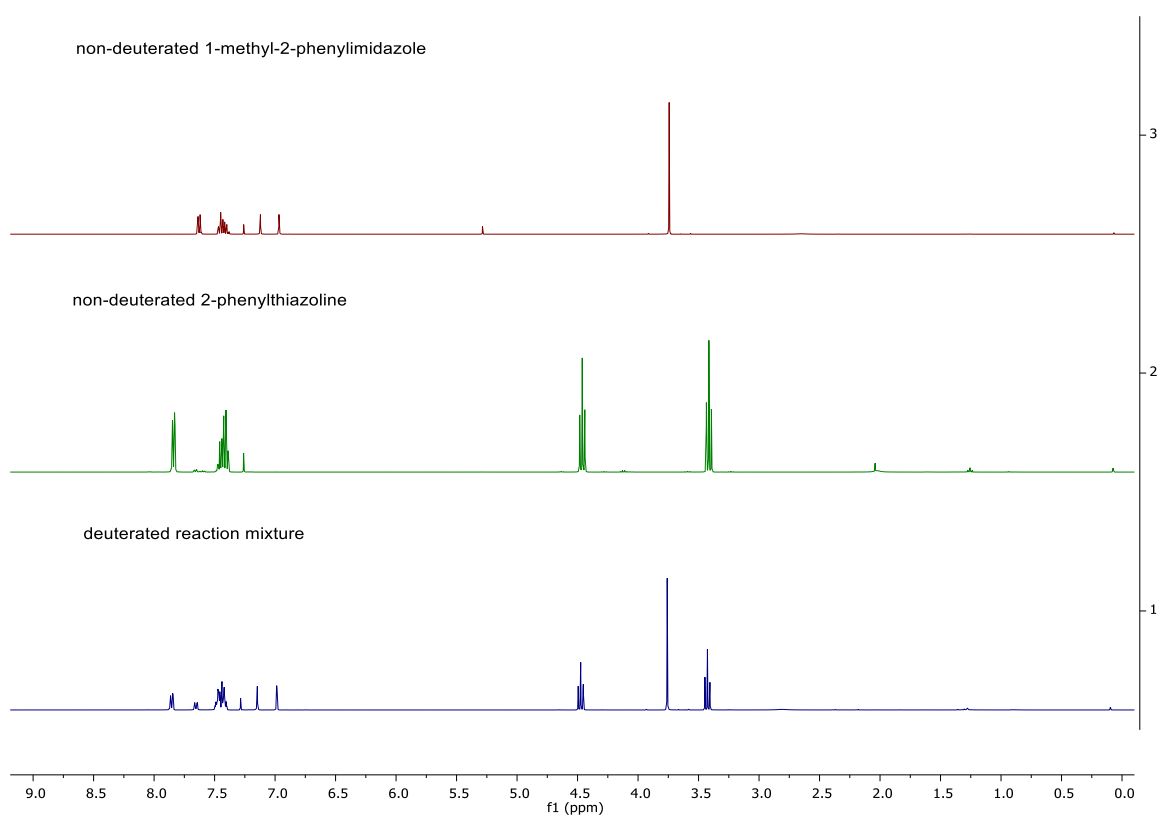

**Figure S89.** Stacked <sup>1</sup>H NMR (400 MHz, CDCl<sub>3</sub>) of non-deuterated substrates and reaction mixture.

D326556  
 Person kpb19112  
 DT-77-1  
 @proton CDCl3 {C:\NMRdata} DJN 11

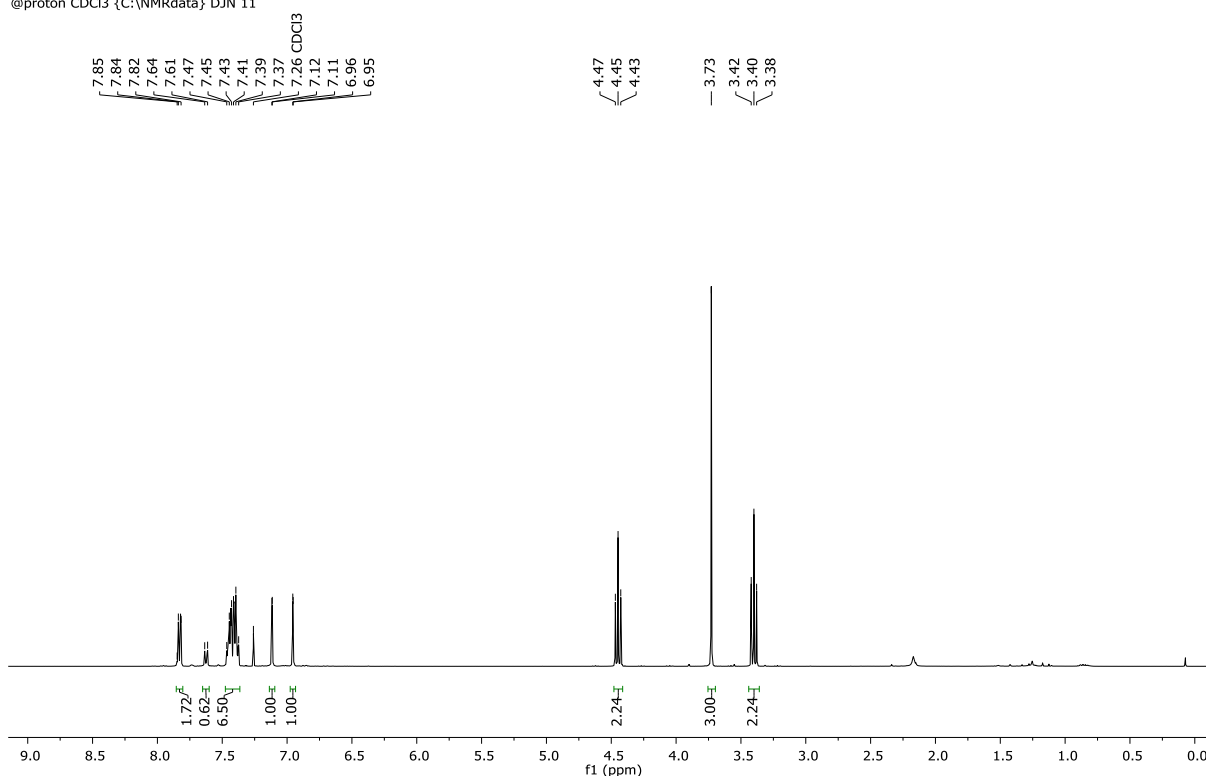

**Figure S90.**  $^1\text{H}$  NMR (400 MHz,  $\text{CDCl}_3$ ) of the competition experiment between 1-methyl-2-phenylimidazole and 2-phenylthiazoline (entry 1, Table S20).

D326557  
 Person kpb19112  
 DT-77-2  
 @proton CDCl3 {C:\NMRdata} DJN 12

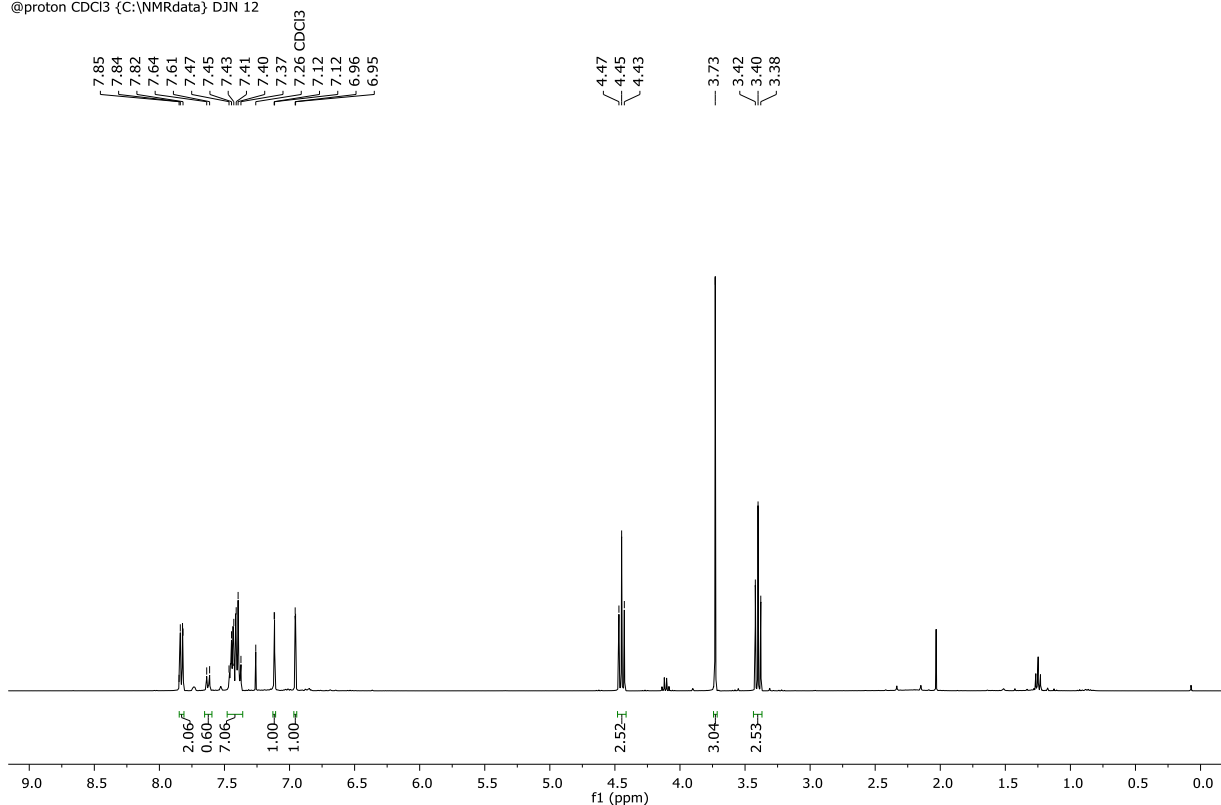

**Figure S91.**  $^1\text{H}$  NMR (400 MHz,  $\text{CDCl}_3$ ) of the competition experiment between 1-methyl-2-phenylimidazole and 2-phenylthiazoline (entry 2, Table S20).

D326712  
 Person kpb19112  
 DT-77-3  
 @proton CDCl3 {C:\NMRdata} DJN 18

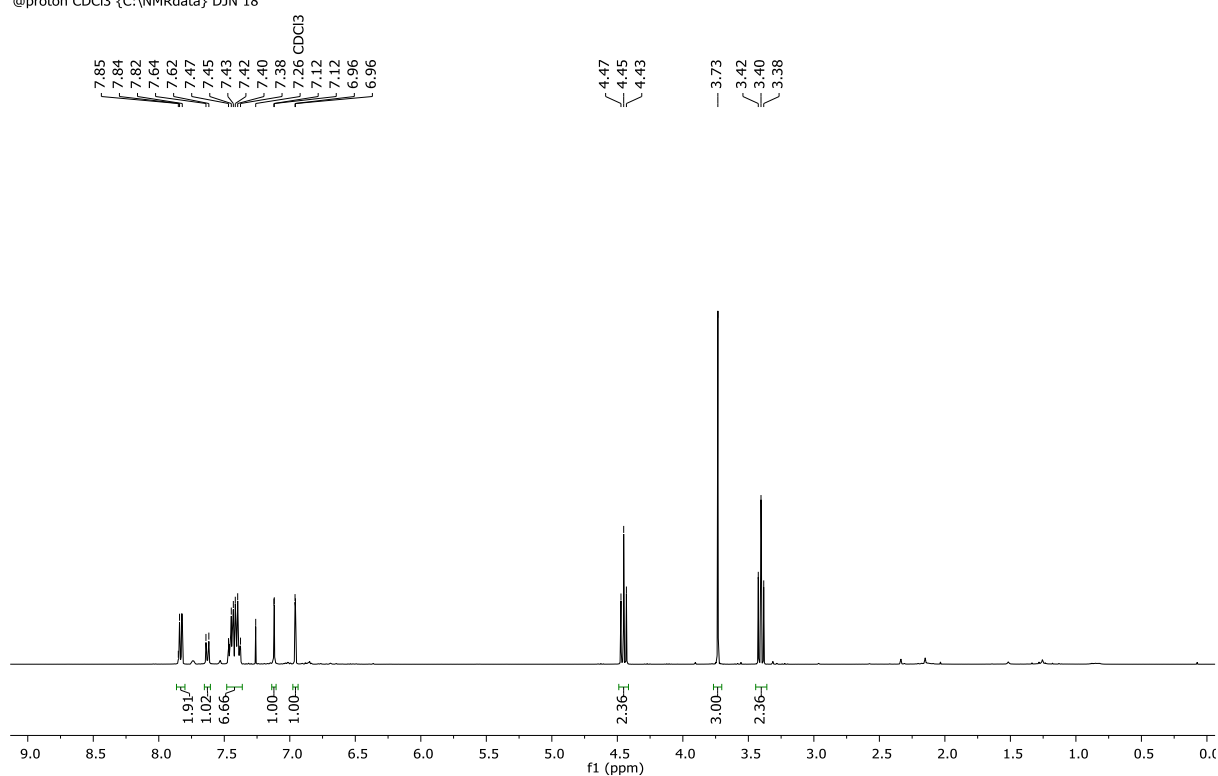

**Figure S92.** <sup>1</sup>H NMR (400 MHz, CDCl<sub>3</sub>) of the competition experiment between 1-methyl-2-phenylimidazole and 2-phenylthiazoline (entry 3, Table S20).

**Table S21.** Determination of the competition rate constant  $\kappa$  from the labelling experiment between 1-methyl-2-phenylimidazole and 2-phenylpyridine.

|                                                                                                                                                                                                                                                                                                                                                                                               | Substrate <b>R1</b>                                                               | Substrate <b>R2</b>                                                               | Catalyst                                                             |                              |                              |                  |          |
|-----------------------------------------------------------------------------------------------------------------------------------------------------------------------------------------------------------------------------------------------------------------------------------------------------------------------------------------------------------------------------------------------|-----------------------------------------------------------------------------------|-----------------------------------------------------------------------------------|----------------------------------------------------------------------|------------------------------|------------------------------|------------------|----------|
|                                                                                                                                                                                                                                                                                                                                                                                               | 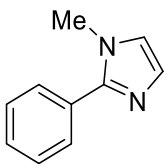 |  | <b>Ir-1</b><br>[(COD)Ir(IMes)PPh <sub>3</sub> ][BArF <sub>24</sub> ] |                              |                              |                  |          |
| Mass                                                                                                                                                                                                                                                                                                                                                                                          | 15.8 mg                                                                           | 15.5 mg                                                                           | 8.7 mg                                                               |                              |                              |                  |          |
| Deuteration expected at $\delta$ ( <b>R1</b> ) = 7.65 – 7.60 ppm and at $\delta$ ( <b>R2</b> ) = 8.02 – 7.96 ppm                                                                                                                                                                                                                                                                              |                                                                                   |                                                                                   |                                                                      |                              |                              |                  |          |
| Determined against integral at $\delta$ ( <b>R1</b> ) = 7.14 ppm and at $\delta$ ( <b>R2</b> ) = 8.73 – 8.66 ppm                                                                                                                                                                                                                                                                              |                                                                                   |                                                                                   |                                                                      |                              |                              |                  |          |
| <i>Spectral details of the deuterated reaction mixture:</i>                                                                                                                                                                                                                                                                                                                                   |                                                                                   |                                                                                   |                                                                      |                              |                              |                  |          |
| <sup>1</sup> H NMR (400 MHz, CDCl <sub>3</sub> ) $\delta$ = 8.73 – 8.66 (m, 1H, <b>R2</b> ), 8.02 – 7.96 (m, 2H/D <b>R2</b> ), 7.77 – 7.69 (m, 2H <b>R2</b> ), 7.65 – 7.60 (m, 2H/D, <b>R1</b> ), 7.50 – 7.36 (m, 3H, <b>R1</b> and 3H, <b>R2</b> ), 7.24 – 7.18 (m, 1H, <b>R2</b> ), 7.12 (d, $J$ =1.2 Hz, 1H, <b>R1</b> ), 6.95 (d, $J$ =1.2 Hz, 1H, <b>R1</b> ), 3.73 (s, 3H, <b>R1</b> ). |                                                                                   |                                                                                   |                                                                      |                              |                              |                  |          |
| Entry                                                                                                                                                                                                                                                                                                                                                                                         | I <sub>R1(t)</sub><br>N = 2H                                                      | I <sub>R1(0)</sub><br>N = 1H                                                      | %D <sub>R1</sub>                                                     | I <sub>R2(t)</sub><br>N = 2H | I <sub>R2(0)</sub><br>N = 1H | %D <sub>R2</sub> | $\kappa$ |
| <b>1</b>                                                                                                                                                                                                                                                                                                                                                                                      | 0.59                                                                              | 1.00                                                                              | 70                                                                   | 2.15                         | 1.20                         | 10               | 10.95    |
| <b>2</b>                                                                                                                                                                                                                                                                                                                                                                                      | 0.51                                                                              | 1.00                                                                              | 75                                                                   | 1.88                         | 1.10                         | 15               | 8.69     |
| <b>3</b>                                                                                                                                                                                                                                                                                                                                                                                      | 0.67                                                                              | 1.00                                                                              | 67                                                                   | 2.04                         | 1.13                         | 10               | 10.68    |
| <b>Average <math>\kappa</math> = 10.11</b>                                                                                                                                                                                                                                                                                                                                                    |                                                                                   |                                                                                   |                                                                      |                              |                              |                  |          |

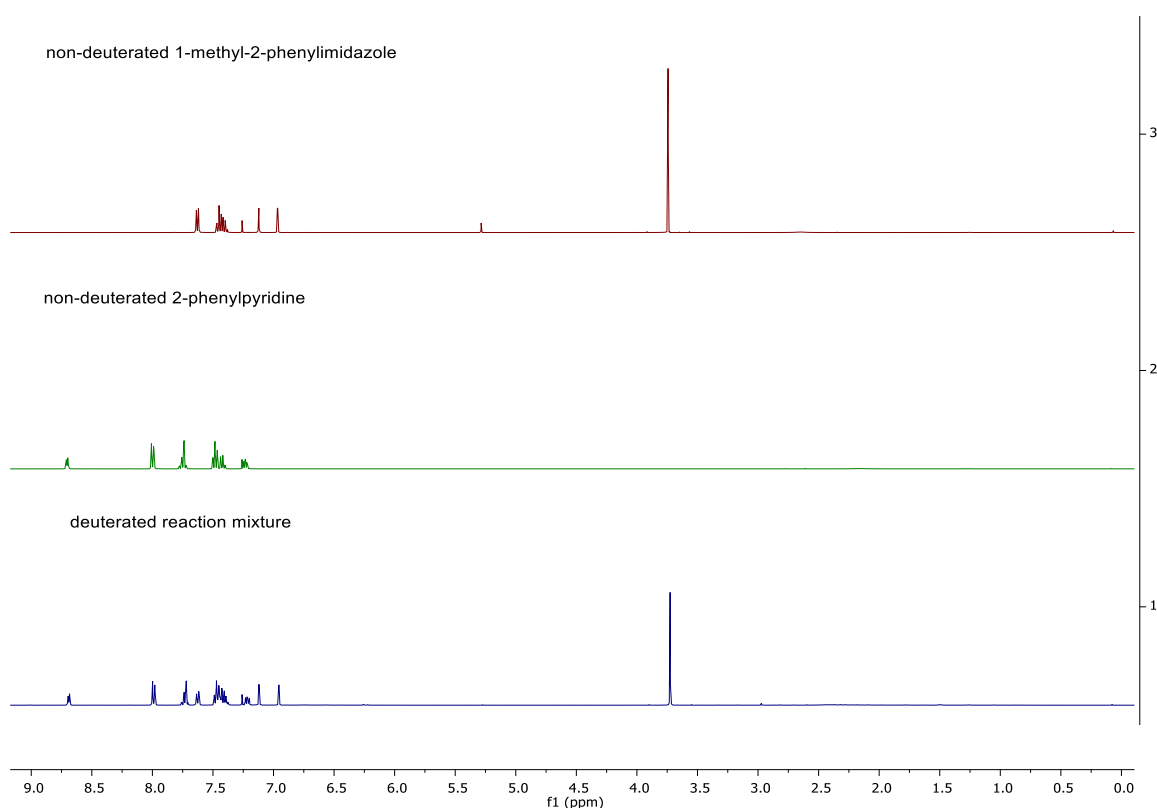

**Figure S93.** Stacked <sup>1</sup>H NMR (400 MHz, CDCl<sub>3</sub>) of non-deuterated substrates and reaction mixture.



D324079  
 Person kpb19112  
 DT-63-1  
 @proton CDCl3 {C:\NMRdata} DJN 6

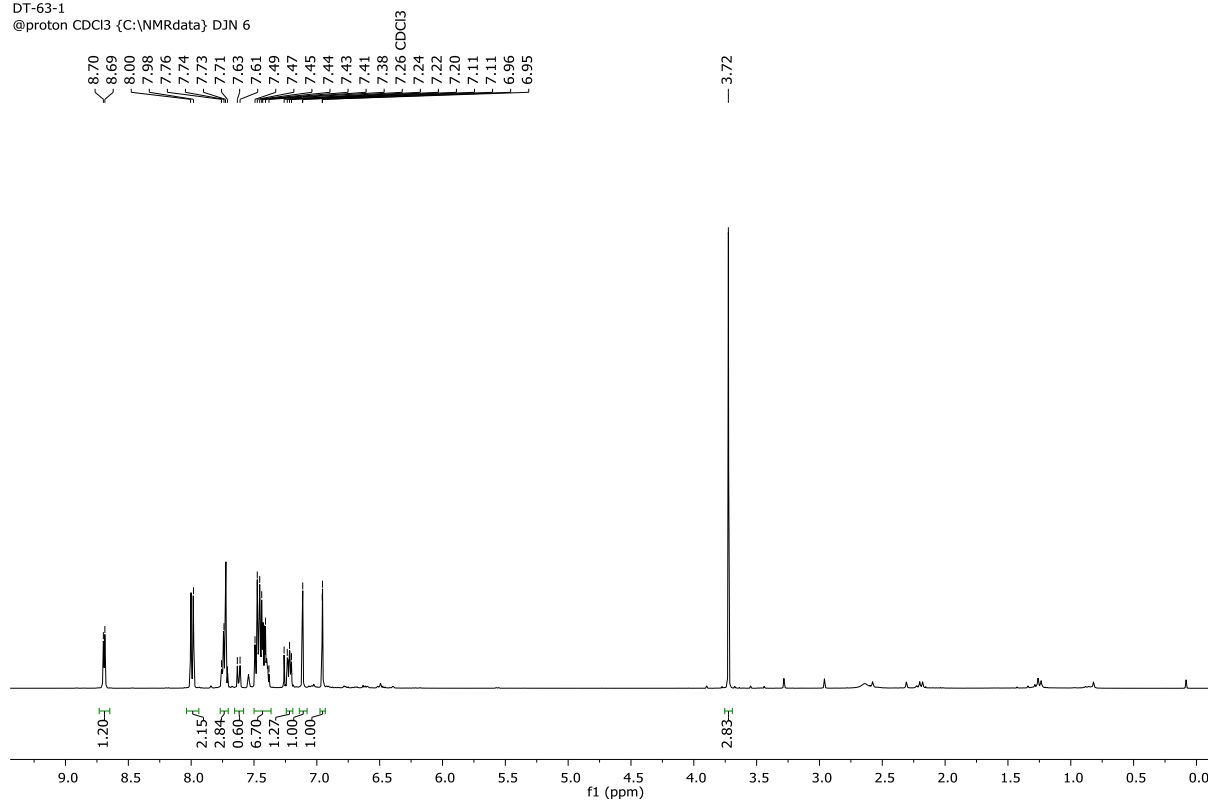

**Figure S94.**  $^1\text{H}$  NMR (400 MHz,  $\text{CDCl}_3$ ) of the competition experiment between 1-methyl-2-phenylimidazole and 2-phenylpyridine (entry 1, Table S21).

D324080  
 Person kpb19112  
 DT-63-2  
 @proton CDCl3 {C:\NMRdata} DJN 7

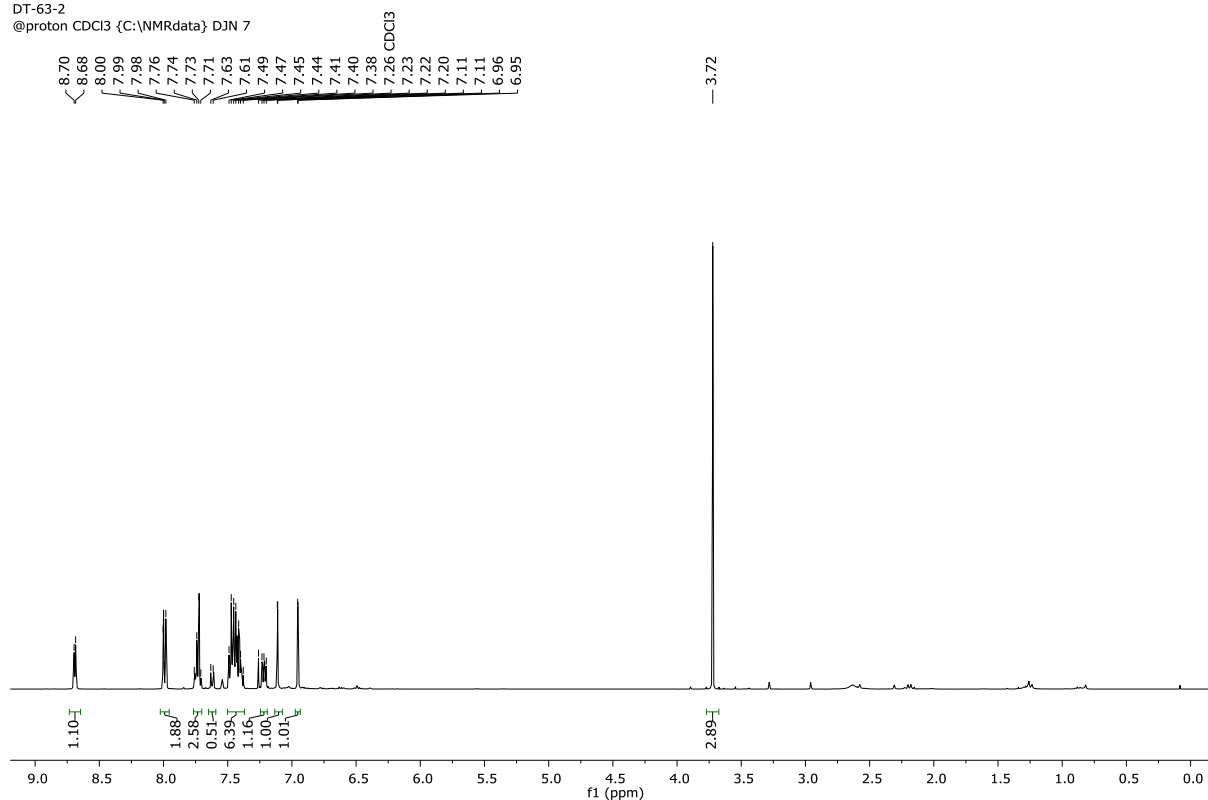

**Figure S95.**  $^1\text{H}$  NMR (400 MHz,  $\text{CDCl}_3$ ) of the competition experiment between 1-methyl-2-phenylimidazole and 2-phenylpyridine (entry 2, Table S21).

D324449  
 Person kpb19112  
 DT-63-5  
 @proton CDCl3 {C:\NMRdata} DJN 10

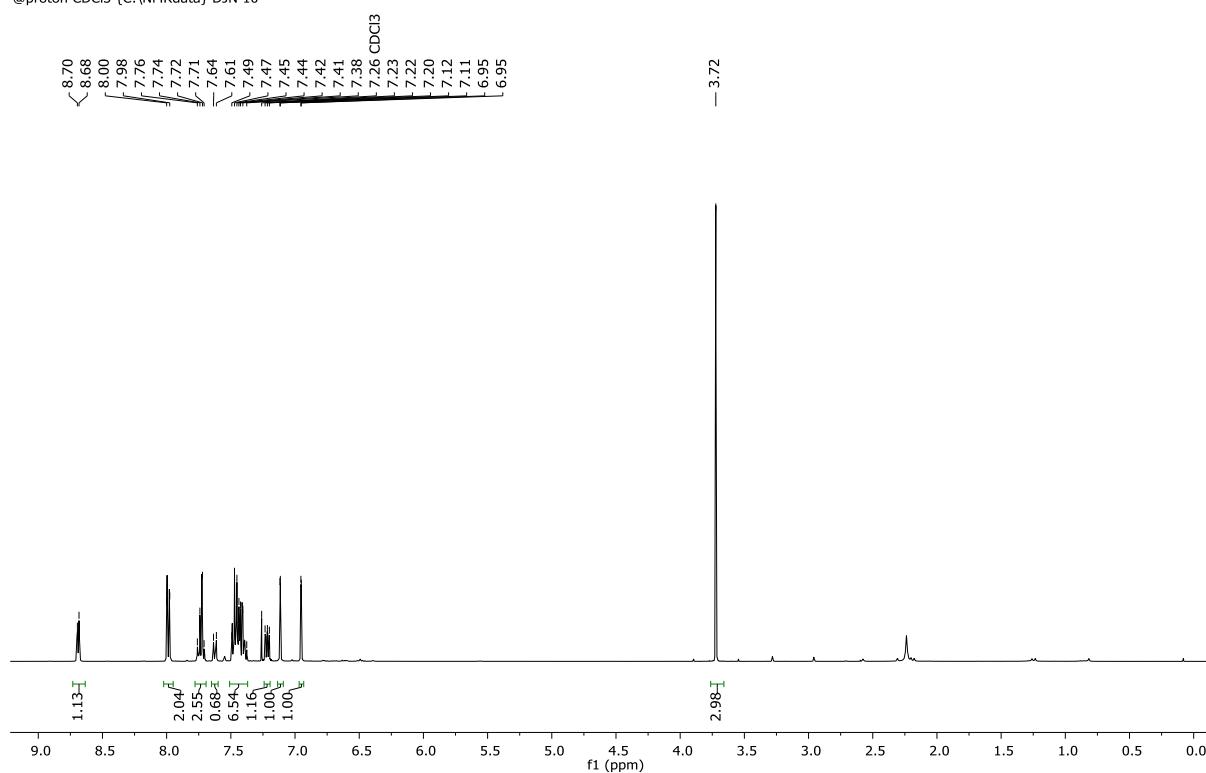

**Figure S96.** <sup>1</sup>H NMR (400 MHz, CDCl<sub>3</sub>) of the competition experiment between 1-methyl-2-phenylimidazole and 2-phenylpyridine (entry 3, Table S21).

**Table S22.** Determination of the competition rate constant  $\kappa$  from the labelling experiment between 2-phenylpyridine and 2-phenylpyrimidine.

|                                                                                                                                                                                                                                                                                                                                                                        | Substrate <b>R1</b>                                                               | Substrate <b>R2</b>                                                               | Catalyst                                                             |                              |                              |                  |          |
|------------------------------------------------------------------------------------------------------------------------------------------------------------------------------------------------------------------------------------------------------------------------------------------------------------------------------------------------------------------------|-----------------------------------------------------------------------------------|-----------------------------------------------------------------------------------|----------------------------------------------------------------------|------------------------------|------------------------------|------------------|----------|
|                                                                                                                                                                                                                                                                                                                                                                        | 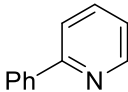 |  | <b>Ir-1</b><br>[(COD)Ir(IMes)PPh <sub>3</sub> ][BArF <sub>24</sub> ] |                              |                              |                  |          |
| Mass                                                                                                                                                                                                                                                                                                                                                                   | 15.5 mg                                                                           | 15.6 mg                                                                           | 8.7 mg                                                               |                              |                              |                  |          |
| Deuteration expected at $\delta$ ( <b>R1</b> ) = 8.02 – 7.97 ppm and at $\delta$ ( <b>R2</b> ) = 8.49 – 8.42 ppm                                                                                                                                                                                                                                                       |                                                                                   |                                                                                   |                                                                      |                              |                              |                  |          |
| Determined against integral at $\delta$ ( <b>R1</b> ) = 7.77 – 7.70 ppm and at $\delta$ ( <b>R2</b> ) = 8.80 ppm                                                                                                                                                                                                                                                       |                                                                                   |                                                                                   |                                                                      |                              |                              |                  |          |
| <i>Spectral details of the deuterated reaction mixture:</i>                                                                                                                                                                                                                                                                                                            |                                                                                   |                                                                                   |                                                                      |                              |                              |                  |          |
| <sup>1</sup> H NMR (400 MHz, CDCl <sub>3</sub> ) $\delta$ = 8.80 (d, $J$ = 4.8 Hz, 2H, <b>R2</b> ), 8.73 – 7.67 (m, 1H, <b>R1</b> ), 8.49 – 8.42 (m, 2H/D, <b>R2</b> ), 8.02 – 7.97 (m, 2H/D <b>R1</b> ), 7.77 – 7.70 (m, 2H, <b>R1</b> ), 7.52 – 7.39 (m, 3H, <b>R1</b> and 3H, <b>R2</b> ), 7.25 – 7.20 (m, 1H, <b>R1</b> ), 7.17 (t, $J$ = 4.8 Hz, 1H, <b>R2</b> ). |                                                                                   |                                                                                   |                                                                      |                              |                              |                  |          |
| Entry                                                                                                                                                                                                                                                                                                                                                                  | I <sub>R1(t)</sub><br>N = 2H                                                      | I <sub>R1(0)</sub><br>N = 2H                                                      | %D <sub>R1</sub>                                                     | I <sub>R2(t)</sub><br>N = 2H | I <sub>R2(0)</sub><br>N = 2H | %D <sub>R2</sub> | $\kappa$ |
| <b>1</b>                                                                                                                                                                                                                                                                                                                                                               | 1.39                                                                              | 1.94                                                                              | 28                                                                   | 1.54                         | 2.00                         | 23               | 1.28     |
| <b>2</b>                                                                                                                                                                                                                                                                                                                                                               | 1.58                                                                              | 1.88                                                                              | 16                                                                   | 1.71                         | 2.00                         | 15               | 1.11     |
| <b>3</b>                                                                                                                                                                                                                                                                                                                                                               | 1.59                                                                              | 1.85                                                                              | 14                                                                   | 1.76                         | 2.00                         | 12               | 1.18     |
| Average $\kappa$ = 1.19                                                                                                                                                                                                                                                                                                                                                |                                                                                   |                                                                                   |                                                                      |                              |                              |                  |          |

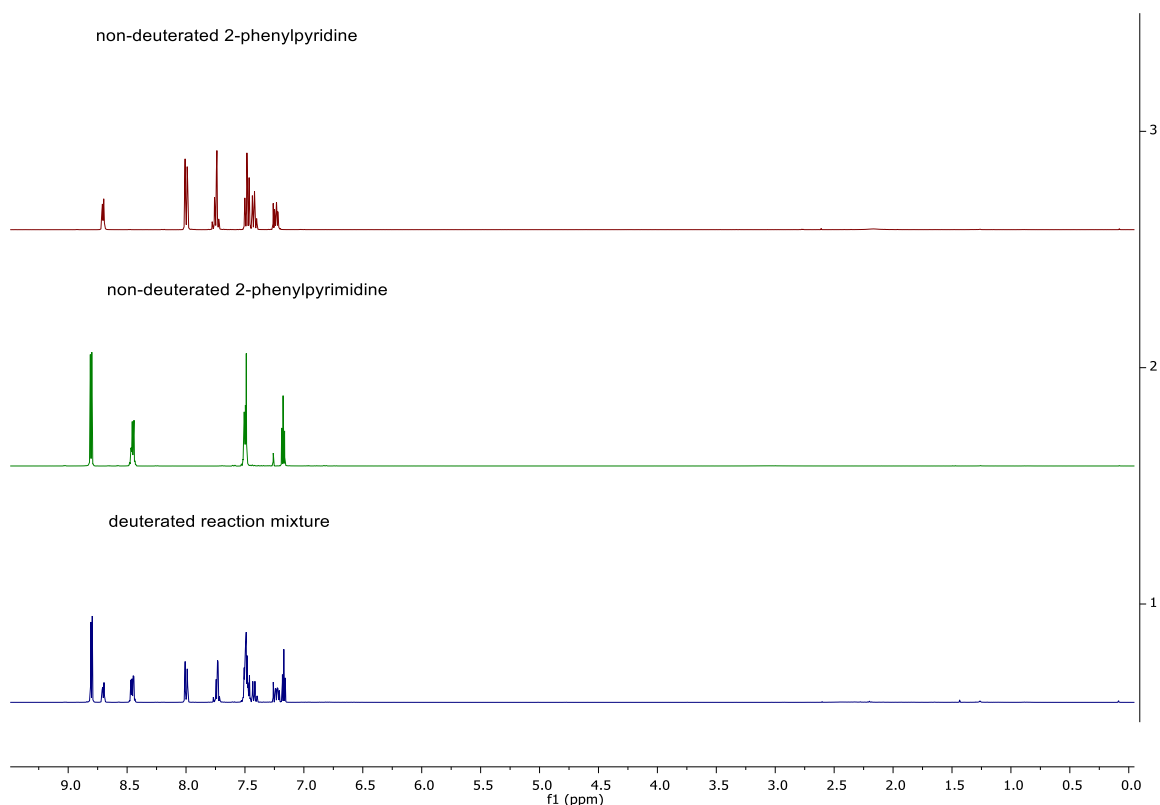

**Figure S97.** Stacked <sup>1</sup>H NMR (400 MHz, CDCl<sub>3</sub>) of non-deuterated substrates and reaction mixture.

D328082  
 Person kpb19112  
 DT-83-1  
 @proton CDCl<sub>3</sub> {C:\NMRdata} DJN 33

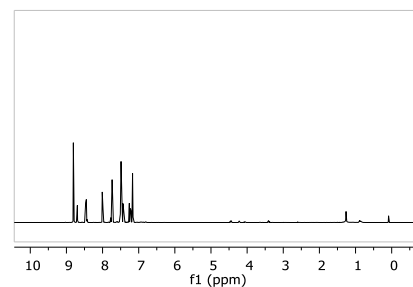

8.81  
8.80  
8.71  
8.70  
8.47  
8.46  
8.45  
8.44  
8.01  
8.01  
7.99  
7.99  
7.77  
7.75  
7.73  
7.72  
7.51  
7.50  
7.48  
7.46  
7.44  
7.42  
7.40  
7.26 CDCl<sub>3</sub>  
7.24  
7.23  
7.21  
7.18  
7.17  
7.16

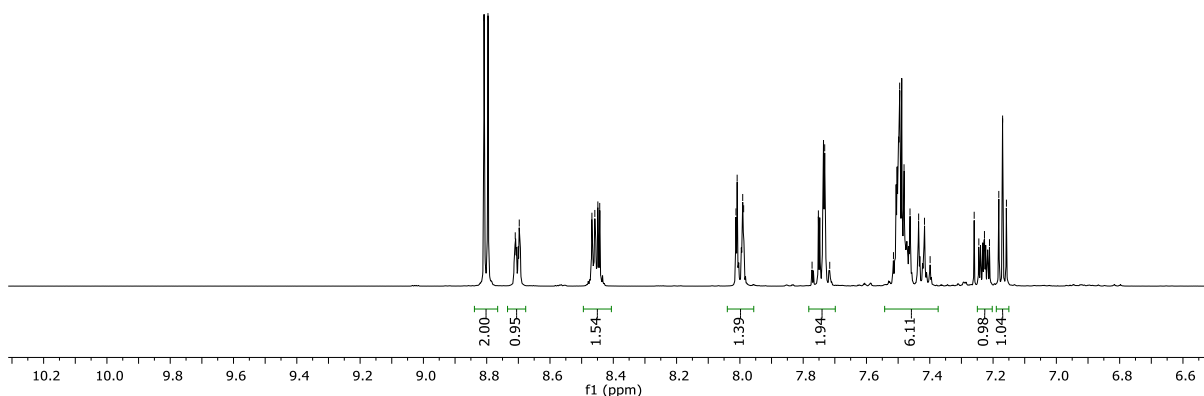

**Figure S98.** <sup>1</sup>H NMR (400 MHz, CDCl<sub>3</sub>) of the competition experiment between 2-phenylpyridine and 2-phenylpyrimidine (entry 1, Table S22).

D328589  
 Person kpb19112  
 DT-83-2  
 @proton CDCl<sub>3</sub> {C:\NMRdata} DJN 7

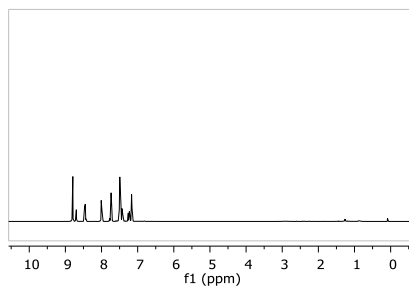

8.81  
8.79  
8.71  
8.69  
8.47  
8.46  
8.45  
8.44  
8.01  
7.99  
7.77  
7.75  
7.73  
7.72  
7.53  
7.49  
7.49  
7.47  
7.46  
7.44  
7.42  
7.40  
7.26 CDCl<sub>3</sub>  
7.25  
7.23  
7.21  
7.18  
7.17  
7.16

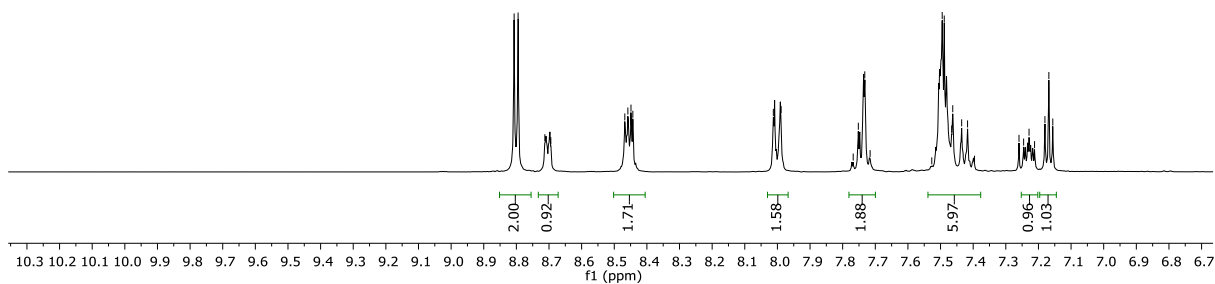

**Figure S99.** <sup>1</sup>H NMR (400 MHz, CDCl<sub>3</sub>) of the competition experiment between 2-phenylpyridine and 2-phenylpyrimidine (entry 2, Table S22).

D328590  
 Person kpb19112  
 DT-83-3  
 @proton CDCl3 {C:\NMRdata} DJN 8

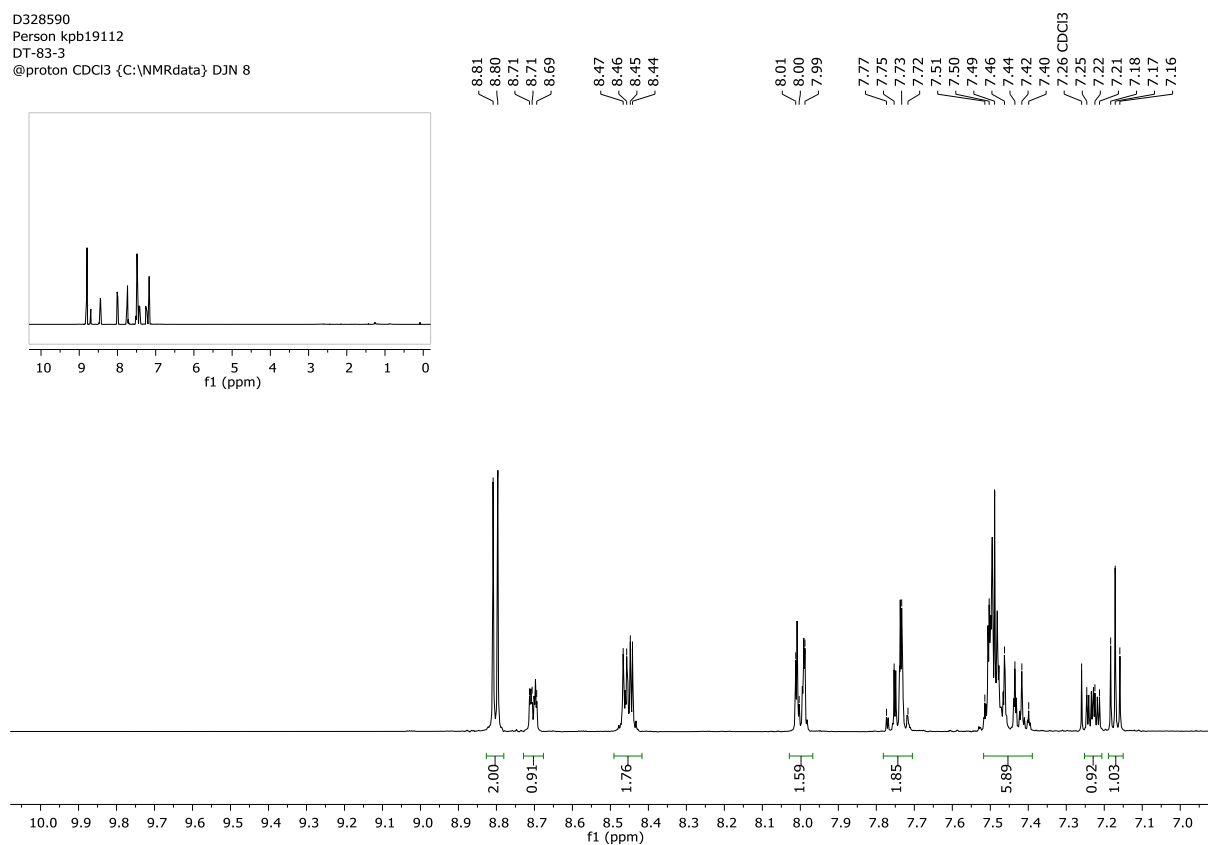

**Figure S100.**  $^1\text{H}$  NMR (400 MHz,  $\text{CDCl}_3$ ) of the competition experiment between 2-phenylpyridine and 2-phenylpyrimidine (entry 3, Table S22).

### 3.4. Competition Experiments with (COD)Ir(IMes)Cl (Ir-2)

**Table S23.** Determination of the competition rate constant  $\kappa$  from the labelling experiment between acetophenone and benzamide.

|                                                                                                                                                                                                                                                         | Substrate <b>R1</b>                                                               | Substrate <b>R2</b>                                                               | Catalyst                         |                              |                              |                  |          |
|---------------------------------------------------------------------------------------------------------------------------------------------------------------------------------------------------------------------------------------------------------|-----------------------------------------------------------------------------------|-----------------------------------------------------------------------------------|----------------------------------|------------------------------|------------------------------|------------------|----------|
|                                                                                                                                                                                                                                                         | 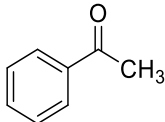 |  | <b>Ir-2</b><br>[(COD)Ir(IMes)Cl] |                              |                              |                  |          |
| Mass                                                                                                                                                                                                                                                    | 12.0 mg                                                                           | 12.1 mg                                                                           | 3.2 mg                           |                              |                              |                  |          |
| Deuteration expected at $\delta$ ( <b>R1</b> ) = 7.95 ppm and at $\delta$ ( <b>R2</b> ) = 7.82 ppm                                                                                                                                                      |                                                                                   |                                                                                   |                                  |                              |                              |                  |          |
| Determined against integral at $\delta$ ( <b>R1</b> ) = 2.60 ppm and at $\delta$ ( <b>R2</b> ) = 7.63 – 7.36 ppm                                                                                                                                        |                                                                                   |                                                                                   |                                  |                              |                              |                  |          |
| <i>Spectral details of the deuterated reaction mixture:</i>                                                                                                                                                                                             |                                                                                   |                                                                                   |                                  |                              |                              |                  |          |
| <sup>1</sup> H NMR (400 MHz, CDCl <sub>3</sub> ) $\delta$ = 7.95 (d, $J$ = 7.5 Hz, H/D <b>R1</b> ), 7.82 (d, $J$ = 7.4 Hz, H/D <b>R2</b> ), 7.63 – 7.36 (m, 3H <b>R1</b> and 3H <b>R2</b> ), 6.25 – 6.13 (bs, 2H, <b>R2</b> ), 2.60 (s, 3H, <b>R1</b> ) |                                                                                   |                                                                                   |                                  |                              |                              |                  |          |
| Entry                                                                                                                                                                                                                                                   | I <sub>R1(t)</sub><br>N = 2H                                                      | I <sub>R1(0)</sub><br>N = 3H                                                      | %D <sub>R1</sub>                 | I <sub>R2(t)</sub><br>N = 2H | I <sub>R2(0)</sub><br>N = 3H | %D <sub>R2</sub> | $\kappa$ |
| <b>1</b>                                                                                                                                                                                                                                                | 1.76                                                                              | 3.00                                                                              | 12                               | 1.95                         | 3.20 <sup>a</sup>            | 9                | 1.42     |
| <b>2</b>                                                                                                                                                                                                                                                | 1.71                                                                              | 3.00                                                                              | 15                               | 1.76                         | 2.93 <sup>b</sup>            | 10               | 1.50     |
| <b>3</b>                                                                                                                                                                                                                                                | 1.41                                                                              | 3.00                                                                              | 30                               | 2.22                         | 4.11 <sup>c</sup>            | 19               | 1.66     |
| Average $\kappa$ = 1.53                                                                                                                                                                                                                                 |                                                                                   |                                                                                   |                                  |                              |                              |                  |          |
| <sup>a</sup> I <sub>R2(0)</sub> = 6.20 – 3.00; <sup>b</sup> I <sub>R2(0)</sub> = 5.93 – 3.00; <sup>c</sup> I <sub>R2(0)</sub> = 7.11 – 3.00;                                                                                                            |                                                                                   |                                                                                   |                                  |                              |                              |                  |          |

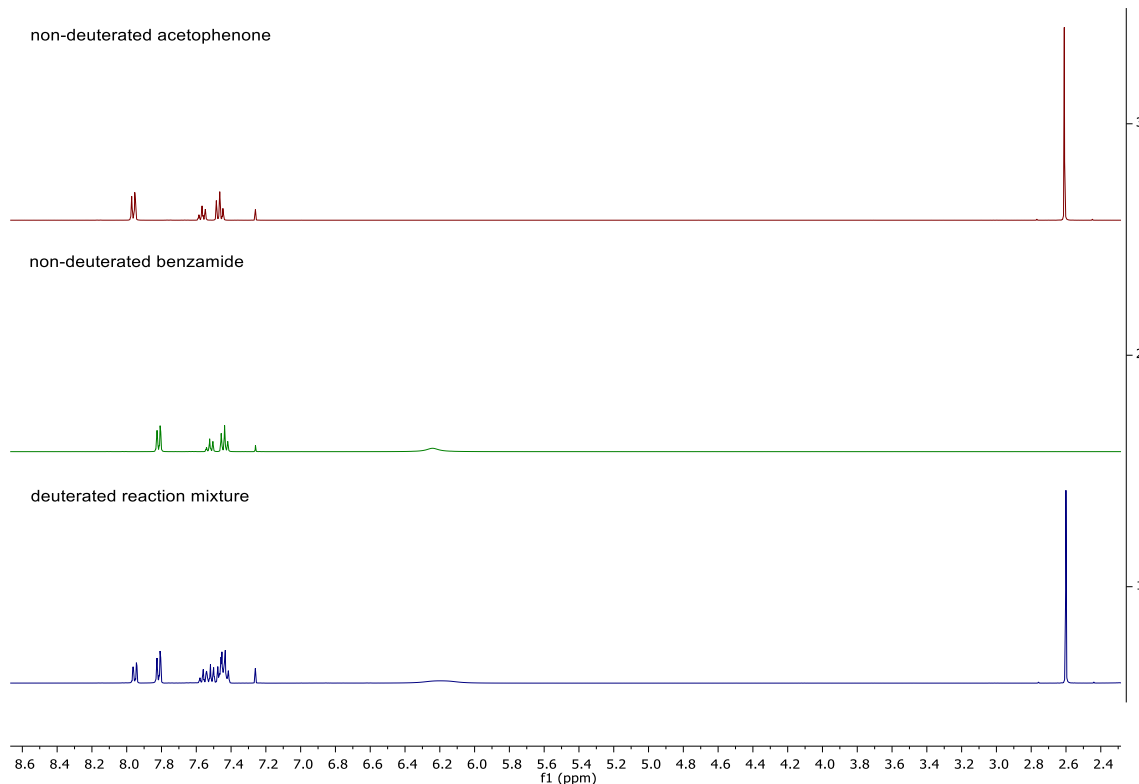

**Figure S101.** Stacked <sup>1</sup>H NMR (400 MHz, CDCl<sub>3</sub>) of non-deuterated substrates and reaction mixture

D322039  
 Person kpb19112  
 DT-26-3  
 @proton CDCl3 {C:\NMRdata} DJN 32

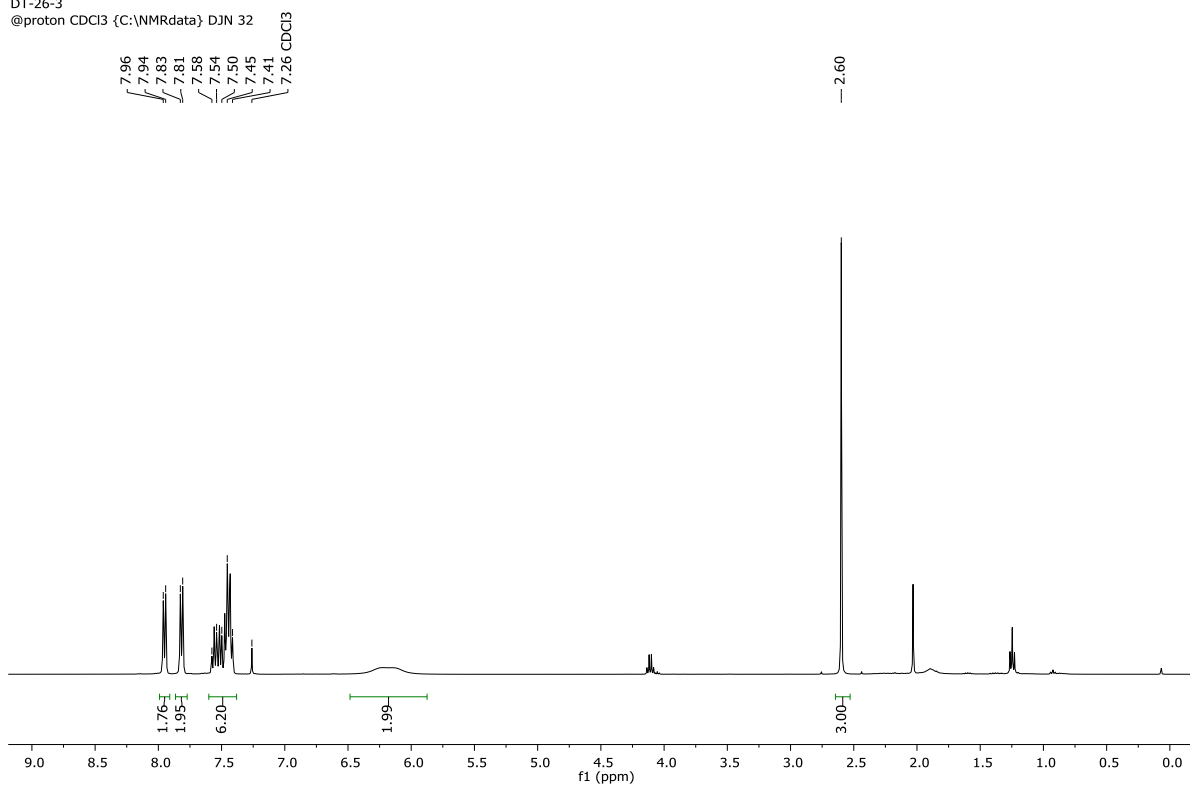

**Figure S102.**  $^1\text{H}$  NMR (400 MHz,  $\text{CDCl}_3$ ) of the competition experiment between acetophenone and benzamide (entry 1, Table S23).

D322040  
 Person kpb19112  
 DT-26-4  
 @proton CDCl3 {C:\NMRdata} DJN 33

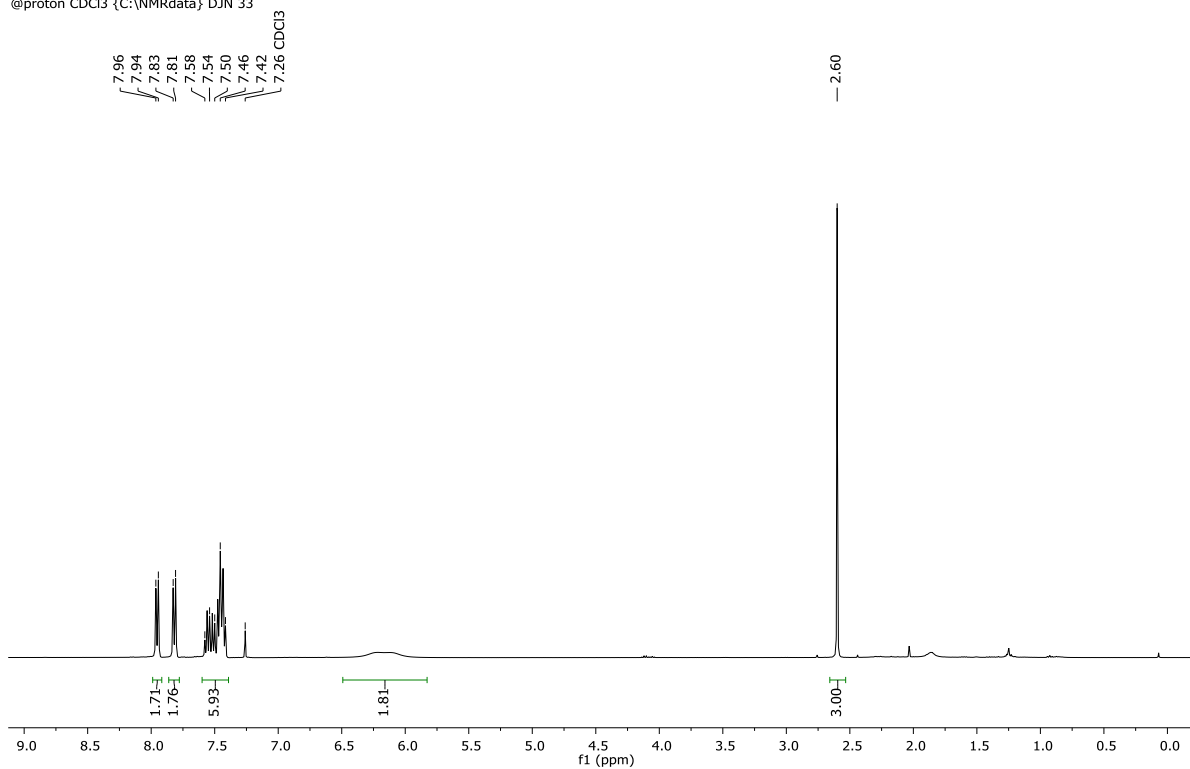

**Figure S103.**  $^1\text{H}$  NMR (400 MHz,  $\text{CDCl}_3$ ) of the competition experiment between acetophenone and benzamide (entry 2, Table S23).

D323566  
Person kpb19112  
DT-27-5  
@proton CDCl3 {C:\NMRdata} DJN 34

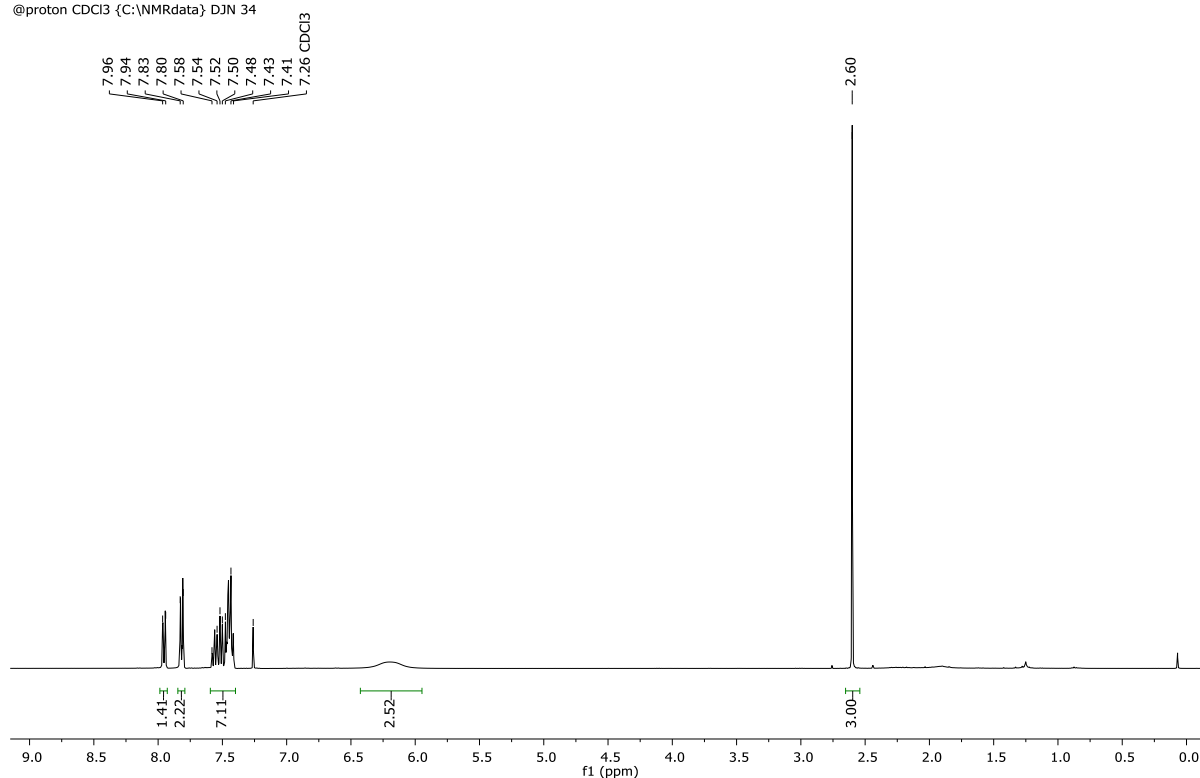

**Figure S104.**  $^1\text{H}$  NMR (400 MHz,  $\text{CDCl}_3$ ) of the competition experiment between acetophenone and benzamide (entry 3, Table S23).



**Table S24.** Determination of the competition rate constant  $\kappa$  from the labelling experiment between benzenesulfonamide and acetophenone.

|                                                                                                                                                                                                                                                | Substrate <b>R1</b>                                                               | Substrate <b>R2</b>                                                               | Catalyst                         |                              |                              |                  |          |
|------------------------------------------------------------------------------------------------------------------------------------------------------------------------------------------------------------------------------------------------|-----------------------------------------------------------------------------------|-----------------------------------------------------------------------------------|----------------------------------|------------------------------|------------------------------|------------------|----------|
|                                                                                                                                                                                                                                                | 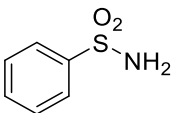 |  | <b>Ir-2</b><br>[(COD)Ir(IMes)Cl] |                              |                              |                  |          |
| Mass                                                                                                                                                                                                                                           | 15.7 mg                                                                           | 12.0 mg                                                                           | 3.2 mg                           |                              |                              |                  |          |
| Deuteration expected at $\delta$ ( <b>R1</b> ) = 7.87 – 7.80 ppm and at $\delta$ ( <b>R2</b> ) = 7.99 – 7.93 ppm                                                                                                                               |                                                                                   |                                                                                   |                                  |                              |                              |                  |          |
| Determined against integral at ( <b>R1</b> ) = 7.66 – 7.51 ppm and at $\delta$ ( <b>R2</b> ) = 2.58 ppm                                                                                                                                        |                                                                                   |                                                                                   |                                  |                              |                              |                  |          |
| <i>Spectral details of the deuterated reaction mixture:</i>                                                                                                                                                                                    |                                                                                   |                                                                                   |                                  |                              |                              |                  |          |
| <sup>1</sup> H NMR (400 MHz, DMSO- <i>d</i> <sub>6</sub> ) $\delta$ = 7.99 – 7.93 (m, 2H/D <b>R2</b> ), 7.87 – 7.80 (m, 2H/D <b>R1</b> ), 7.67 – 7.49 (m, 3H <b>R1</b> and 3H <b>R2</b> ), 7.35 (br, 2H, <b>R1</b> ), 2.58 (s, 3H, <b>R2</b> ) |                                                                                   |                                                                                   |                                  |                              |                              |                  |          |
| Entry                                                                                                                                                                                                                                          | I <sub>R1(t)</sub><br>N = 2H                                                      | I <sub>R1(0)</sub><br>N = 3H                                                      | %D <sub>R1</sub>                 | I <sub>R2(t)</sub><br>N = 2H | I <sub>R2(0)</sub><br>N = 3H | %D <sub>R2</sub> | $\kappa$ |
| <b>1</b>                                                                                                                                                                                                                                       | 2.01                                                                              | 4.26 <sup>a</sup>                                                                 | 29                               | 1.45                         | 3.00                         | 28               | 1.07     |
| <b>2</b>                                                                                                                                                                                                                                       | 1.50                                                                              | 3.80 <sup>b</sup>                                                                 | 41                               | 1.37                         | 3.00                         | 32               | 1.39     |
| <b>3</b>                                                                                                                                                                                                                                       | 1.66                                                                              | 5.39 <sup>c</sup>                                                                 | 54                               | 1.09                         | 3.00                         | 46               | 1.27     |
| <b>Average <math>\kappa = 1.24</math></b>                                                                                                                                                                                                      |                                                                                   |                                                                                   |                                  |                              |                              |                  |          |
| <sup>a</sup> I <sub>R1(t)</sub> = 7.26 – 3.00; <sup>b</sup> I <sub>R1(t)</sub> = 6.80 – 3.00; <sup>c</sup> I <sub>R1(t)</sub> = 8.39 – 3.00;                                                                                                   |                                                                                   |                                                                                   |                                  |                              |                              |                  |          |

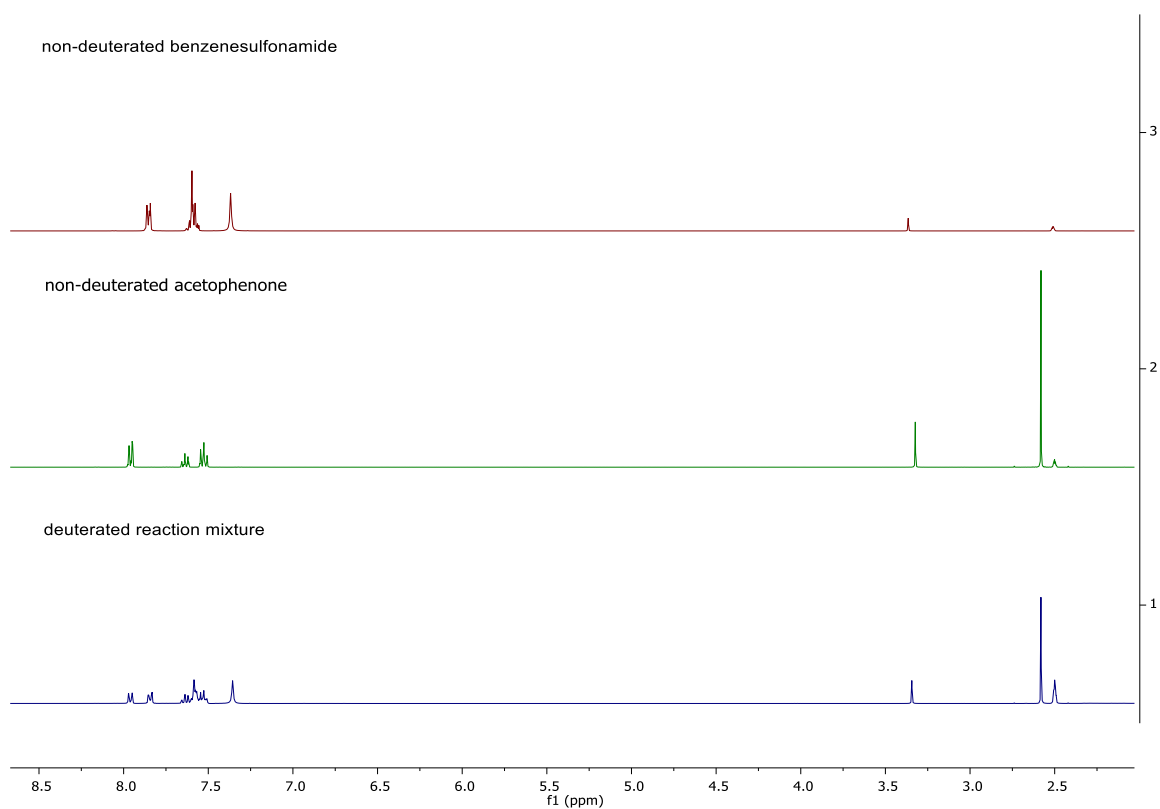

**Figure S105.** Stacked <sup>1</sup>H NMR (400 MHz, DMSO-*d*<sub>6</sub>) of non-deuterated substrates and reaction mixture.

D320142  
 Person kpb19112  
 DT-23-2  
 @proton DMSO {C:\NMRdata} DJN 33

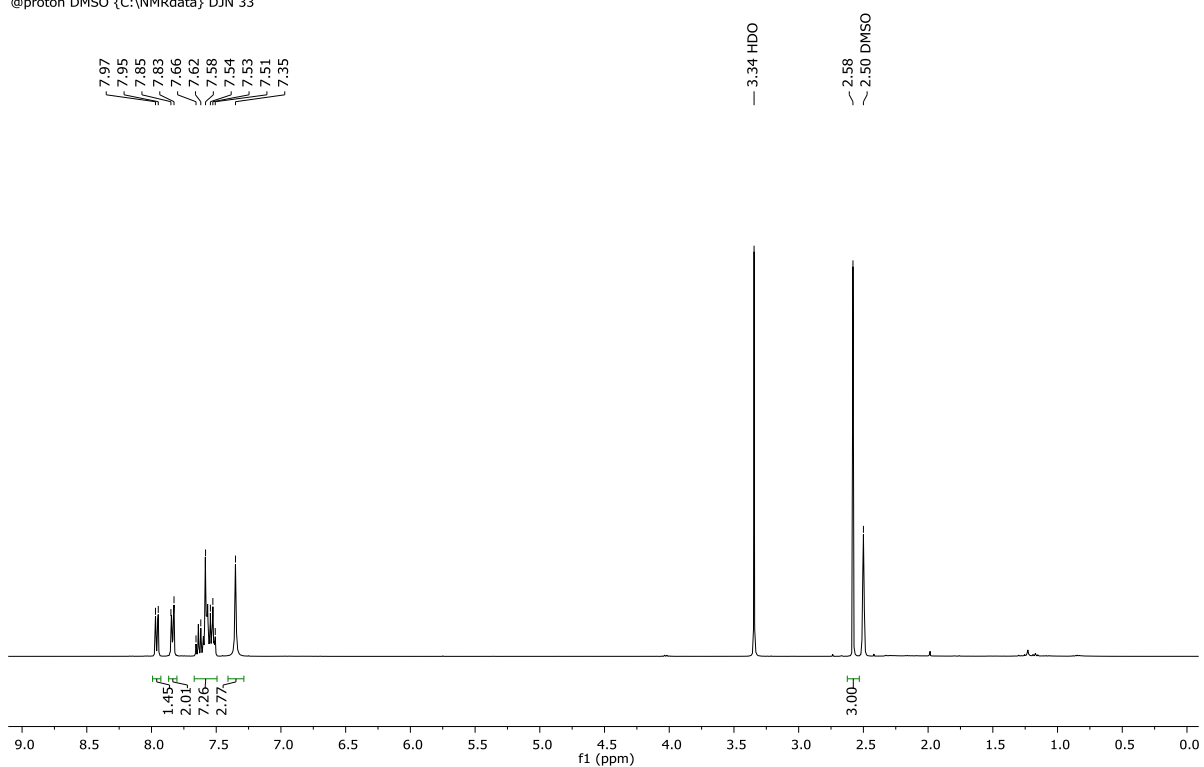

**Figure S106.**  $^1\text{H}$  NMR (400 MHz,  $\text{DMSO}-d_6$ ) of the competition experiment between benzenesulfonamide and acetophenone (entry 1, Table S24).

D320308  
 Person kpb19112  
 DT-23-3  
 @proton DMSO {C:\NMRdata} DJN 26

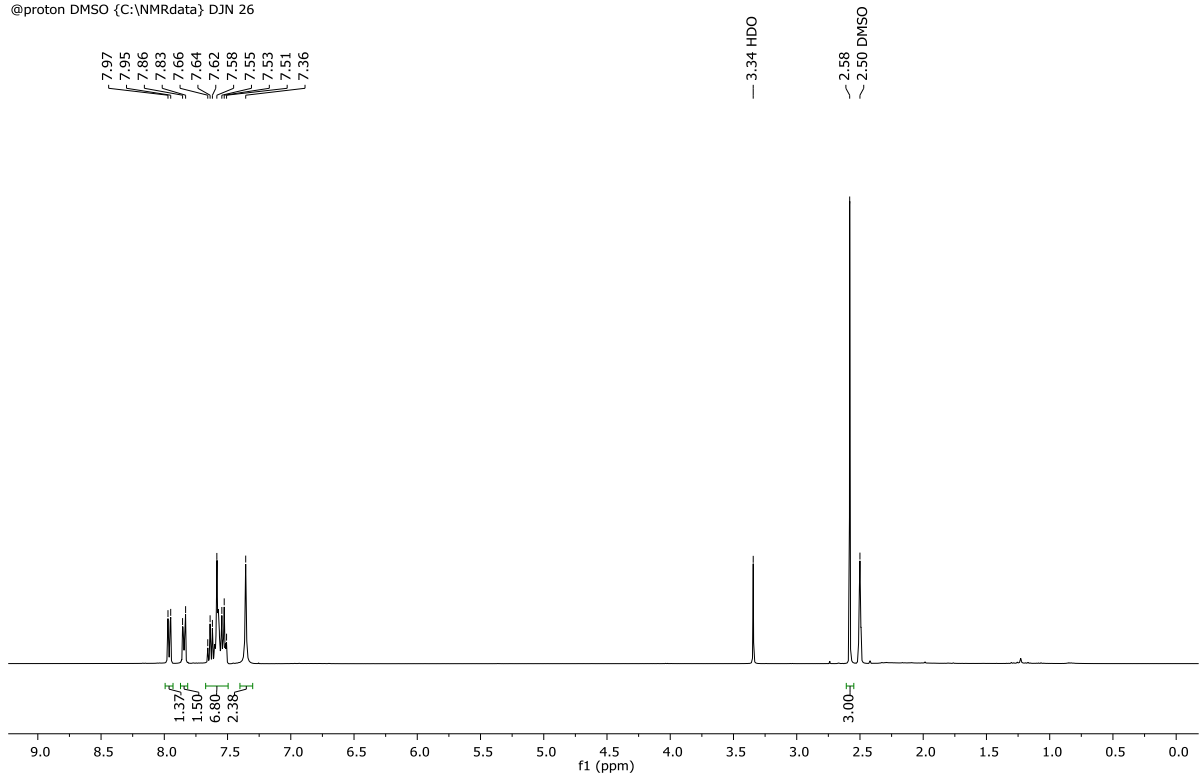

**Figure S107.**  $^1\text{H}$  NMR (400 MHz,  $\text{DMSO}-d_6$ ) of the competition experiment between benzenesulfonamide and acetophenone (entry 2, Table S24).

D323616  
 Person kpb19112  
 DT-23-4  
 @proton DMSO {C:\NMRdata} DJN 20

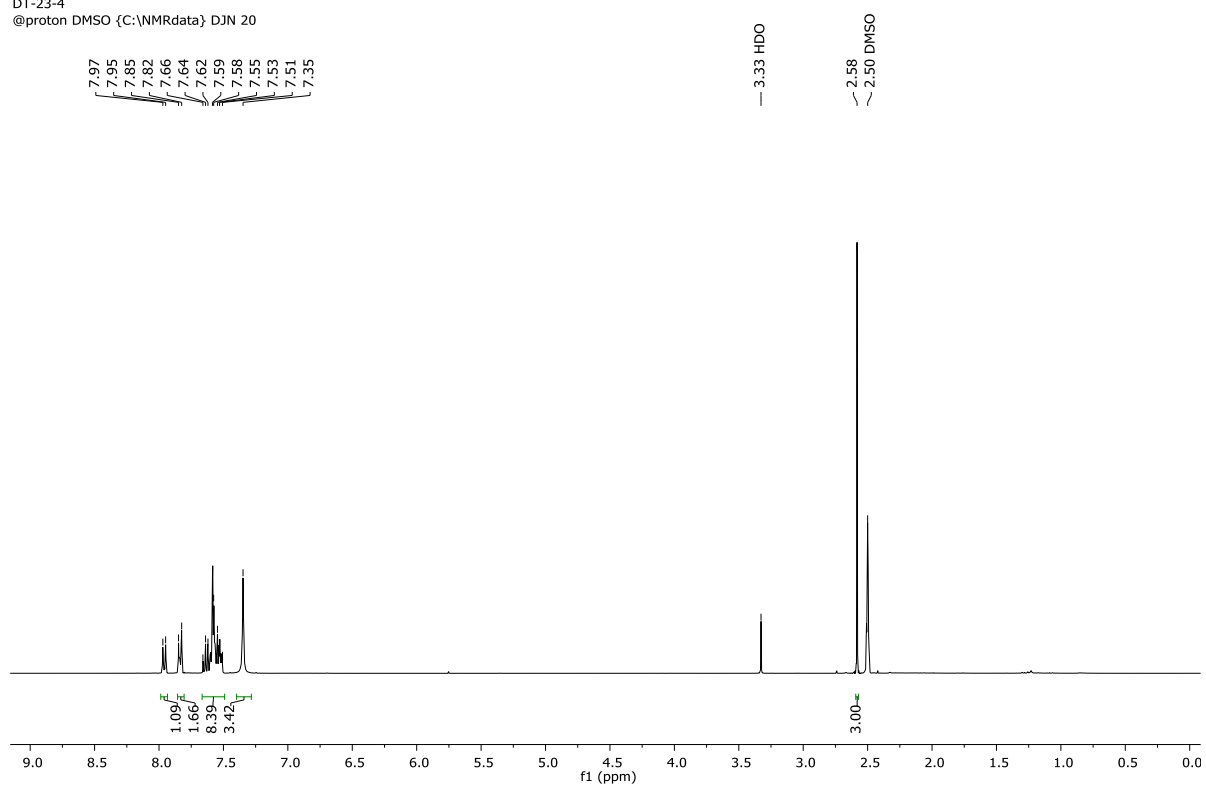

**Figure S108.**  $^1\text{H}$  NMR (400 MHz,  $\text{DMSO}-d_6$ ) of the competition experiment between benzenesulfonamide and acetophenone (entry 3, Table S24).

**Table S25.** Determination of the competition rate constant  $\kappa$  from the labelling experiment between benzenesulfonamide and benzamide.

|                                                                                                                                                                                                                                                                                                                     | Substrate <b>R1</b>                                                               | Substrate <b>R2</b>                                                               | Catalyst                         |                              |                              |                  |          |
|---------------------------------------------------------------------------------------------------------------------------------------------------------------------------------------------------------------------------------------------------------------------------------------------------------------------|-----------------------------------------------------------------------------------|-----------------------------------------------------------------------------------|----------------------------------|------------------------------|------------------------------|------------------|----------|
|                                                                                                                                                                                                                                                                                                                     | 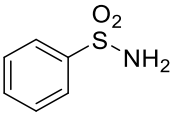 |  | <b>Ir-2</b><br>[(COD)Ir(IMes)Cl] |                              |                              |                  |          |
| Mass                                                                                                                                                                                                                                                                                                                | 15.7 mg                                                                           | 12.1 mg                                                                           | 3.2 mg                           |                              |                              |                  |          |
| Deuteration expected at $\delta$ ( <b>R1</b> ) = 7.86 – 7.81 ppm and at $\delta$ ( <b>R2</b> ) = 7.90 – 7.86 ppm                                                                                                                                                                                                    |                                                                                   |                                                                                   |                                  |                              |                              |                  |          |
| Determined against integral at $\delta$ ( <b>R1</b> ) = 7.63 – 7.54 ppm and at $\delta$ ( <b>R2</b> ) = 7.48 – 7.41 ppm                                                                                                                                                                                             |                                                                                   |                                                                                   |                                  |                              |                              |                  |          |
| <i>Spectral details of the deuterated reaction mixture:</i>                                                                                                                                                                                                                                                         |                                                                                   |                                                                                   |                                  |                              |                              |                  |          |
| <sup>1</sup> H NMR (400 MHz, DMSO- <i>d</i> <sub>6</sub> ) $\delta$ = 7.96 (bs, 1H, <b>R2</b> ), 7.90 – 7.86 (m, 2H/D <b>R2</b> ), 7.86 – 7.81 (m, 2H/D <b>R1</b> ), 7.63 – 7.54 (m, 3H, <b>R1</b> ), 7.54 – 7.49 (m, 1H, <b>R2</b> ), 7.48 – 7.41 (m, 2H, <b>R2</b> ), 7.35 (bs, 1H, <b>R2</b> and 2H, <b>R1</b> ) |                                                                                   |                                                                                   |                                  |                              |                              |                  |          |
| Entry                                                                                                                                                                                                                                                                                                               | I <sub>R1(t)</sub><br>N = 2H                                                      | I <sub>R1(0)</sub><br>N = 3H                                                      | %D <sub>R1</sub>                 | I <sub>R2(t)</sub><br>N = 2H | I <sub>R2(0)</sub><br>N = 2H | %D <sub>R2</sub> | $\kappa$ |
| <b>1</b>                                                                                                                                                                                                                                                                                                            | 1.30                                                                              | 3.07                                                                              | 36                               | 1.84                         | 2.00                         | 8                | 5.44     |
| <b>2</b>                                                                                                                                                                                                                                                                                                            | 1.44                                                                              | 3.19                                                                              | 32                               | 1.88                         | 2.00                         | 6                | 6.30     |
| <b>3</b>                                                                                                                                                                                                                                                                                                            | 1.55                                                                              | 2.98                                                                              | 22                               | 1.90                         | 2.00                         | 5                | 4.84     |
| <b>Average <math>\kappa</math> = 5.53</b>                                                                                                                                                                                                                                                                           |                                                                                   |                                                                                   |                                  |                              |                              |                  |          |

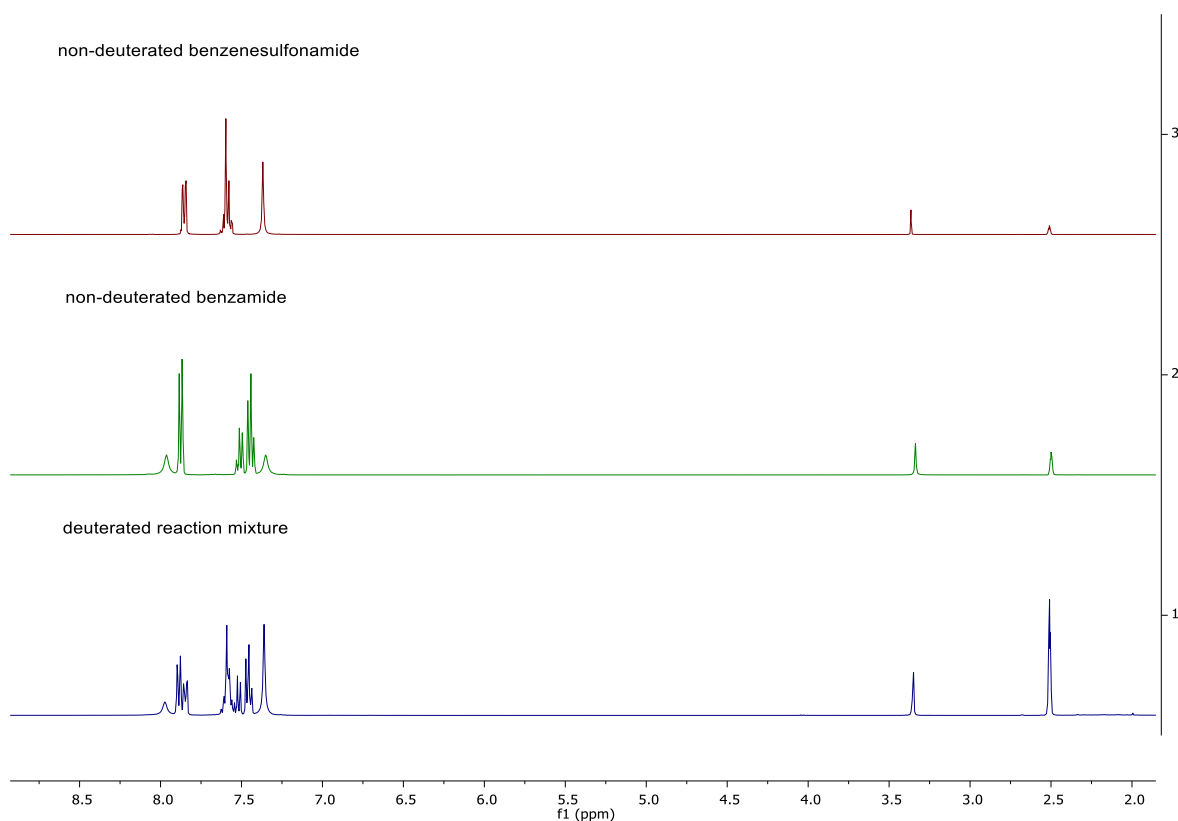

**Figure S109.** Stacked <sup>1</sup>H NMR (400 MHz, DMSO-*d*<sub>6</sub>) of non-deuterated substrates and reaction mixture.

D323618  
 Person kpb19112  
 DT-27-5  
 @proton DMSO {C:\NMRdata} DJN 22

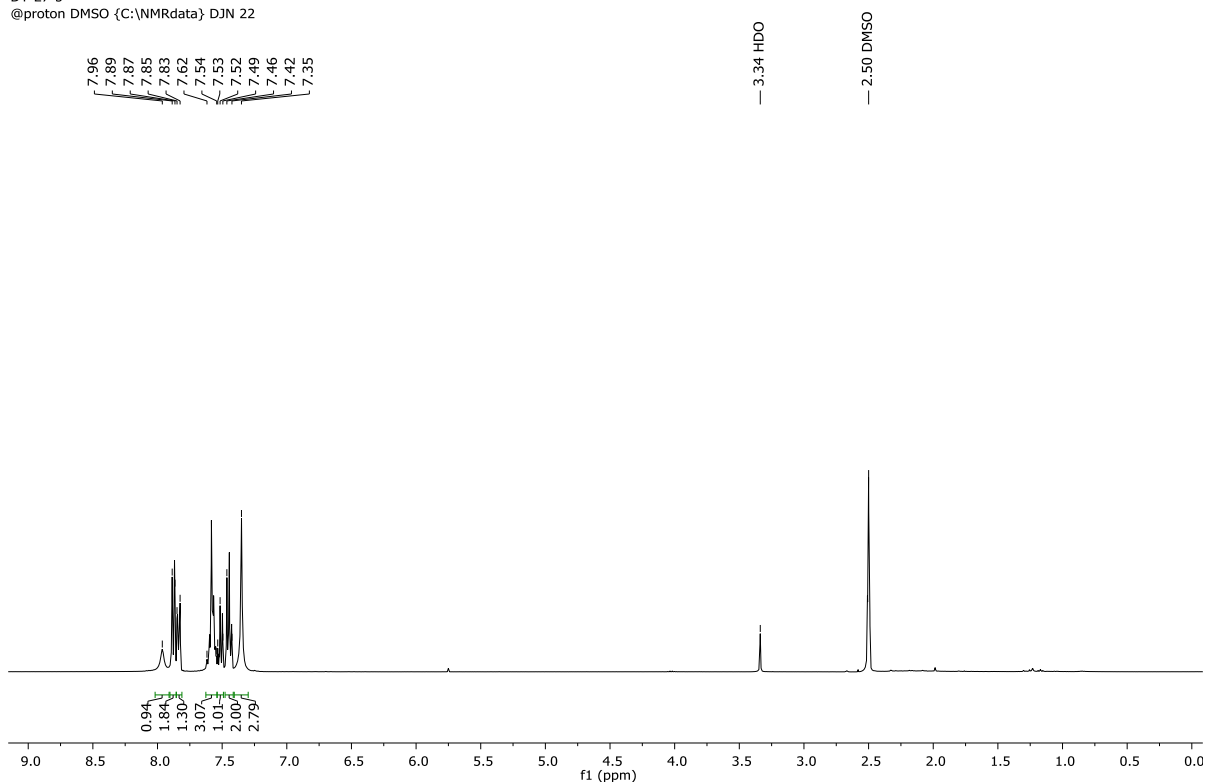

**Figure S110.**  $^1\text{H}$  NMR (400 MHz,  $\text{DMSO}-d_6$ ) of the competition experiment between benzenesulfonamide and benzamide (entry 1, Table S25).

B58397  
 Person kpb19112  
 dt-27-3  
 @proton16 DMSO {C:\NMRdata} DJN 23

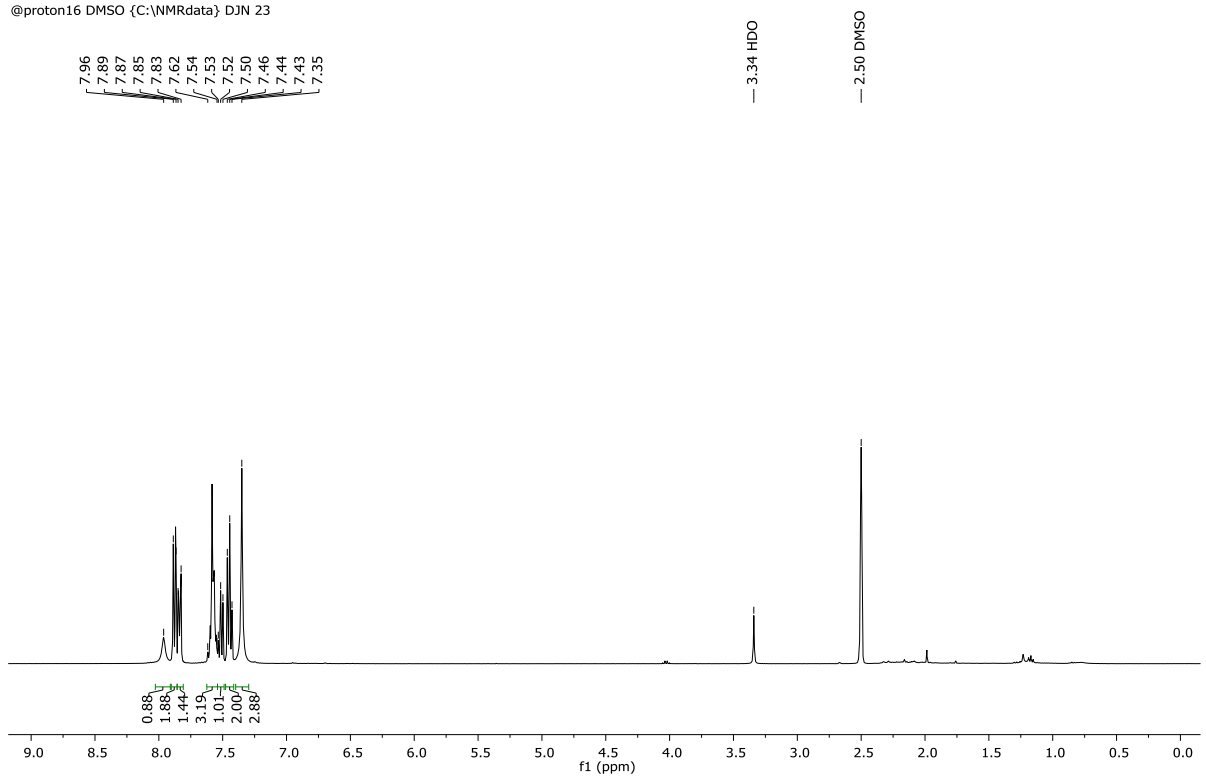

**Figure S111.**  $^1\text{H}$  NMR (400 MHz,  $\text{DMSO}-d_6$ ) of the competition experiment between benzenesulfonamide and benzamide (entry 2, Table S25).

B58398  
 Person kpb19112  
 dt-27-4  
 @proton16 DMSO {C:\NMRdata} DJN 24

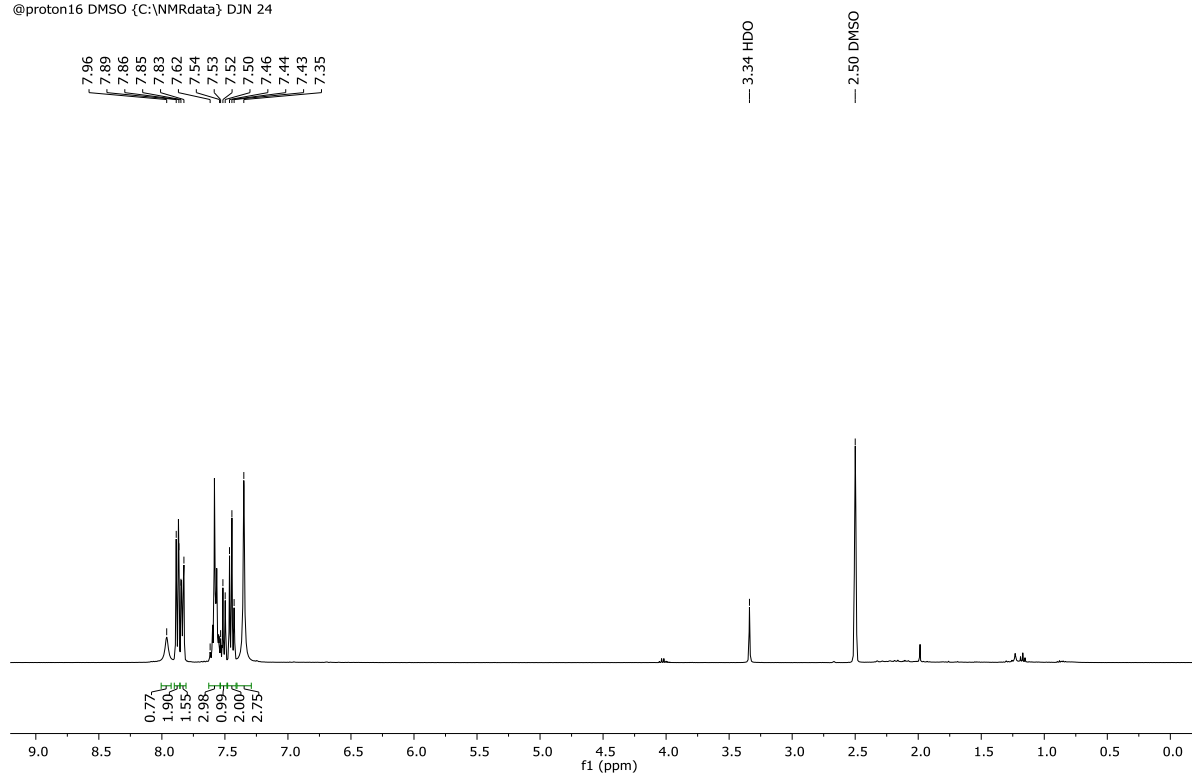

**Figure S112.**  $^1\text{H}$  NMR (400 MHz,  $\text{DMSO}-d_6$ ) of the competition experiment between benzenesulfonamide and benzamide (entry 3, Table S25).

**Table S26.** Determination of the competition rate constant  $\kappa$  from the labelling experiment between acetophenone and *N,N*-dimethylbenzamide.

|                                                                                                                                                                                                                                                                               | Substrate <b>R1</b>                                                               | Substrate <b>R2</b>                                                               | Catalyst                         |                              |                              |                  |          |
|-------------------------------------------------------------------------------------------------------------------------------------------------------------------------------------------------------------------------------------------------------------------------------|-----------------------------------------------------------------------------------|-----------------------------------------------------------------------------------|----------------------------------|------------------------------|------------------------------|------------------|----------|
|                                                                                                                                                                                                                                                                               | 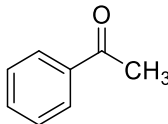 |  | <b>Ir-2</b><br>[(COD)Ir(IMes)Cl] |                              |                              |                  |          |
| Mass                                                                                                                                                                                                                                                                          | 12.0 mg                                                                           | 14.9 mg                                                                           | 3.2 mg                           |                              |                              |                  |          |
| Deuteration expected at $\delta$ ( <b>R1</b> ) = 7.99 – 7.92 ppm and at $\delta$ ( <b>R2</b> ) = 7.42 – 7.35 ppm                                                                                                                                                              |                                                                                   |                                                                                   |                                  |                              |                              |                  |          |
| Determined against integral at $\delta$ ( <b>R1</b> ) = 2.60 ppm and at $\delta$ ( <b>R2</b> ) = 3.18 – 2.88 ppm                                                                                                                                                              |                                                                                   |                                                                                   |                                  |                              |                              |                  |          |
| <i>Spectral details of the deuterated reaction mixture:</i>                                                                                                                                                                                                                   |                                                                                   |                                                                                   |                                  |                              |                              |                  |          |
| <sup>1</sup> H NMR (400 MHz, CDCl <sub>3</sub> ) $\delta$ = 7.99 – 7.92 (m, 2H/D <b>R1</b> ), 7.58 – 7.53 (m, 1H, <b>R1</b> ), 7.48 – 7.43 (m, 2H, <b>R1</b> ), 7.42 – 7.35 (m, 2H/D <b>R2</b> and 3H, <b>R2</b> ), 3.18 – 2.88 (m, 6H, <b>R2</b> ), 2.60 (s, 3H, <b>R1</b> ) |                                                                                   |                                                                                   |                                  |                              |                              |                  |          |
| Entry                                                                                                                                                                                                                                                                         | I <sub>R1(t)</sub><br>N = 2H                                                      | I <sub>R1(0)</sub><br>N = 3H                                                      | %D <sub>R1</sub>                 | I <sub>R2(t)</sub><br>N = 2H | I <sub>R2(0)</sub><br>N = 6H | %D <sub>R2</sub> | $\kappa$ |
| <b>1</b>                                                                                                                                                                                                                                                                      | 0.83                                                                              | 3.00                                                                              | 59                               | 2.99 <sup>a</sup>            | 9.79                         | 9                | 9.87     |
| <b>2</b>                                                                                                                                                                                                                                                                      | 0.94                                                                              | 3.00                                                                              | 53                               | 1.88 <sup>b</sup>            | 6.12                         | 8                | 9.24     |
| <b>3</b>                                                                                                                                                                                                                                                                      | 1.04                                                                              | 3.00                                                                              | 48                               | 2.12 <sup>c</sup>            | 6.77                         | 6                | 10.09    |
| <b>Average <math>\kappa</math> = 9.73</b>                                                                                                                                                                                                                                     |                                                                                   |                                                                                   |                                  |                              |                              |                  |          |
| <sup>a</sup> I <sub>R2(t)</sub> = 7.88 – (9.79) / 6 × 3; <sup>b</sup> I <sub>R2(t)</sub> = 4.94 – (6.12) / 6 × 3; <sup>c</sup> I <sub>R2(t)</sub> = 5.50 – (6.77) / 6 × 3                                                                                                     |                                                                                   |                                                                                   |                                  |                              |                              |                  |          |

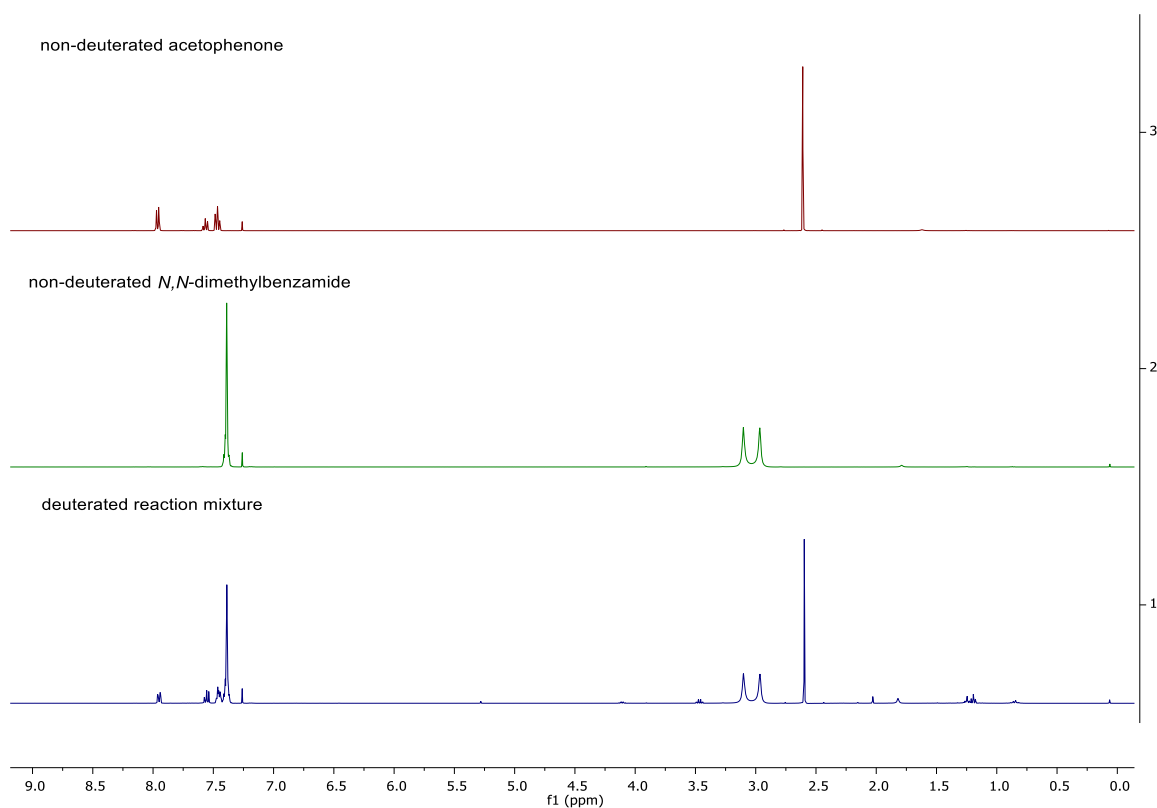

**Figure S113.** Stacked <sup>1</sup>H NMR (400 MHz, CDCl<sub>3</sub>) of non-deuterated substrates and reaction mixture.

D320863  
 Person kpb19112  
 DT-31-1  
 @proton CDCl3 {C:\NMRdata} DJN 56

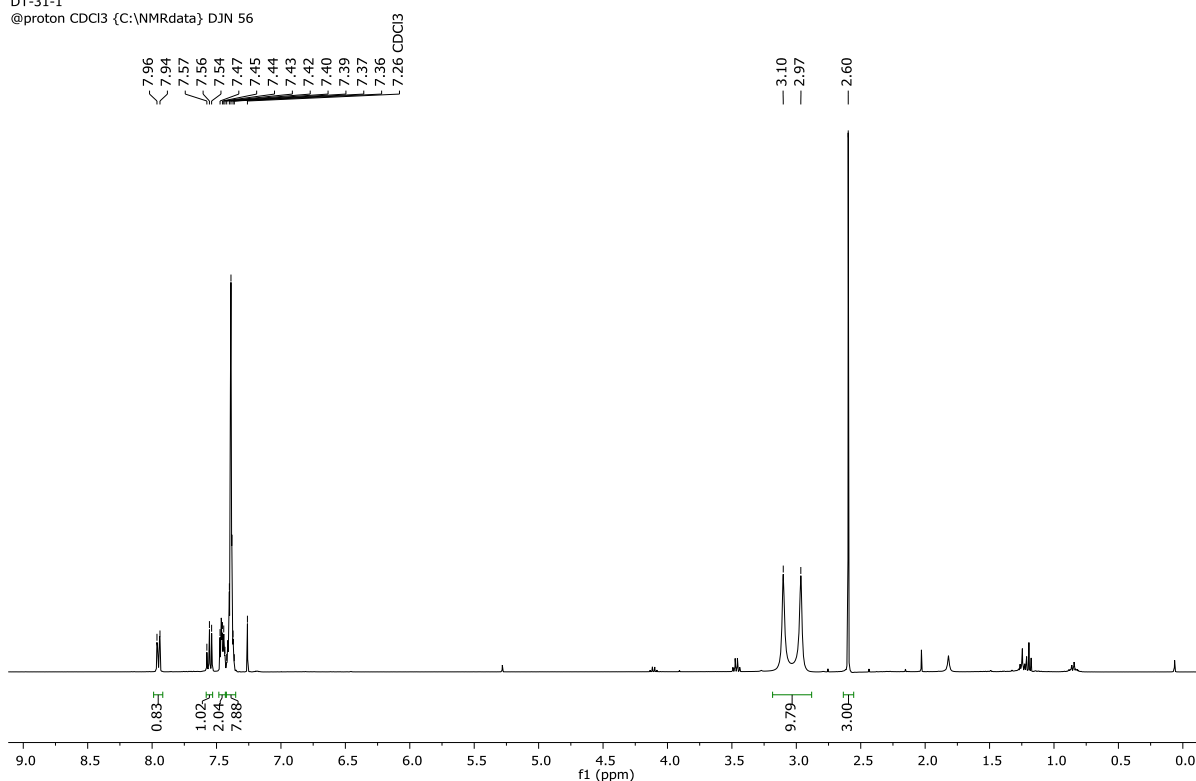

**Figure S114.** <sup>1</sup>H NMR (400 MHz, CDCl<sub>3</sub>) of the competition experiment between acetophenone and *N,N*-dimethylbenzamide (entry 1, Table S26).

D321082  
 Person kpb19112  
 DT-31-2  
 @proton CDCl3 {C:\NMRdata} DJN 9

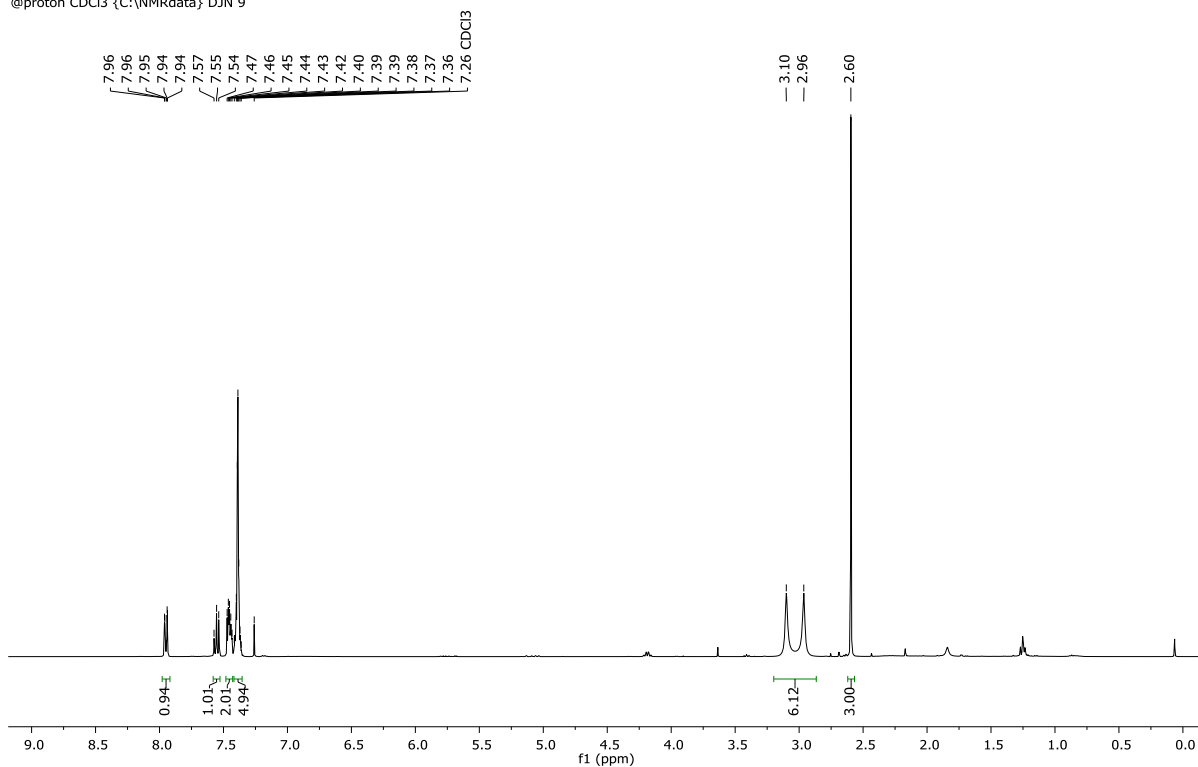

**Figure S115.** <sup>1</sup>H NMR (400 MHz, CDCl<sub>3</sub>) of the competition experiment between acetophenone and *N,N*-dimethylbenzamide (entry 2, Table S26).



D321069  
Person kpb19112  
DT-31-3  
@proton CDCl3 {C:\NMRdata} DJN 52

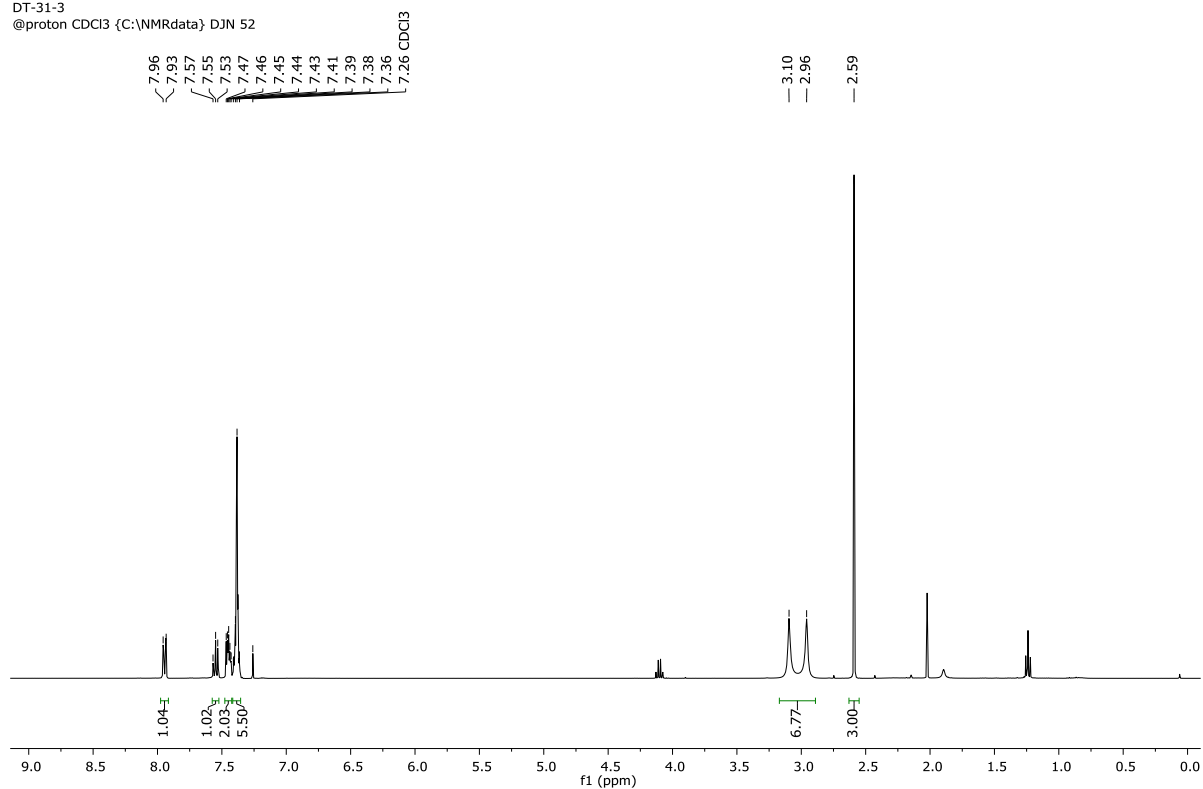

**Figure S116.** <sup>1</sup>H NMR (400 MHz, CDCl<sub>3</sub>) of the competition experiment between acetophenone and *N,N*-dimethylbenzamide (entry 3, Table S26).

**Table S27.** Determination of the competition rate constant  $\kappa$  from the labelling experiment between benzenesulfonamide and methylphenylsulfone.

|                                                                                                                                                                                                                                                                        | Substrate <b>R1</b>                                                               | Substrate <b>R2</b>                                                               | Catalyst                         |                              |                              |                   |          |
|------------------------------------------------------------------------------------------------------------------------------------------------------------------------------------------------------------------------------------------------------------------------|-----------------------------------------------------------------------------------|-----------------------------------------------------------------------------------|----------------------------------|------------------------------|------------------------------|-------------------|----------|
|                                                                                                                                                                                                                                                                        | 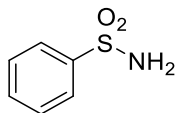 |  | <b>Ir-2</b><br>[(COD)Ir(IMes)Cl] |                              |                              |                   |          |
| Mass                                                                                                                                                                                                                                                                   | 15.7 mg                                                                           | 15.6 mg                                                                           | 3.2 mg                           |                              |                              |                   |          |
| Deuteration expected at $\delta$ ( <b>R1</b> ) = 7.85 – 7.83 ppm and at $\delta$ ( <b>R2</b> ) = 7.95 – 7.93 ppm                                                                                                                                                       |                                                                                   |                                                                                   |                                  |                              |                              |                   |          |
| Determined against integral at $\delta$ ( <b>R1</b> ) = 7.60 – 7.55 ppm and at $\delta$ ( <b>R2</b> ) = 7.64 – 7.62 ppm                                                                                                                                                |                                                                                   |                                                                                   |                                  |                              |                              |                   |          |
| <i>Spectral details of the deuterated reaction mixture:</i>                                                                                                                                                                                                            |                                                                                   |                                                                                   |                                  |                              |                              |                   |          |
| <sup>1</sup> H NMR (400 MHz, DMSO- <i>d</i> <sub>6</sub> ) $\delta$ = 7.95 – 7.93 (m, 2H/D <b>R2</b> ), 7.85 – 7.83 (m, 2H/D <b>R1</b> ), 7.76 – 7.72 (m, 1H, <b>R2</b> ), 7.64 – 7.62 (m, 2H, <b>R2</b> ), 7.60 – 7.55 (m, 3H, <b>R1</b> ), 7.35 (bs, 2H, <b>R1</b> ) |                                                                                   |                                                                                   |                                  |                              |                              |                   |          |
| Entry                                                                                                                                                                                                                                                                  | I <sub>R1(t)</sub><br>N = 2H                                                      | I <sub>R1(0)</sub><br>N = 3H                                                      | % D <sub>R1</sub>                | I <sub>R2(t)</sub><br>N = 2H | I <sub>R2(0)</sub><br>N = 2H | % D <sub>R2</sub> | $\kappa$ |
| <b>1</b>                                                                                                                                                                                                                                                               | 1.42                                                                              | 2.94                                                                              | 28                               | 1.98                         | 2.00                         | 1                 | 32.07    |
| <b>2</b>                                                                                                                                                                                                                                                               | 0.64                                                                              | 2.68                                                                              | 64                               | 1.95                         | 2.00                         | 3                 | 40.55    |
| <b>3</b>                                                                                                                                                                                                                                                               | 1.42                                                                              | 3.30                                                                              | 35                               | 1.98                         | 2.00                         | 1                 | 43.56    |
| <b>Average <math>\kappa</math> = 38.73</b>                                                                                                                                                                                                                             |                                                                                   |                                                                                   |                                  |                              |                              |                   |          |

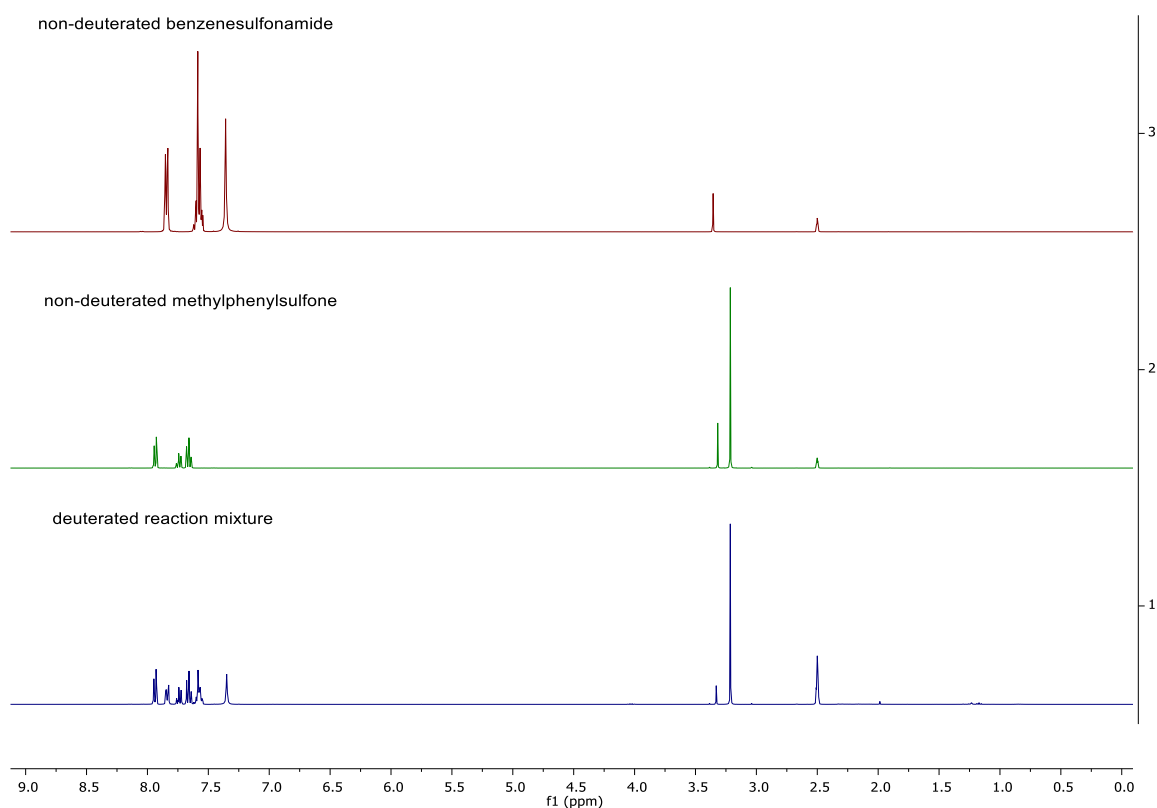

**Figure S117.** Stacked <sup>1</sup>H NMR (400 MHz, DMSO-*d*<sub>6</sub>) of non-deuterated substrates and reaction mixture.

D320158  
 Person kpb19112  
 DT-24-1  
 @proton DMSO {C:\NMRdata} DJN 42

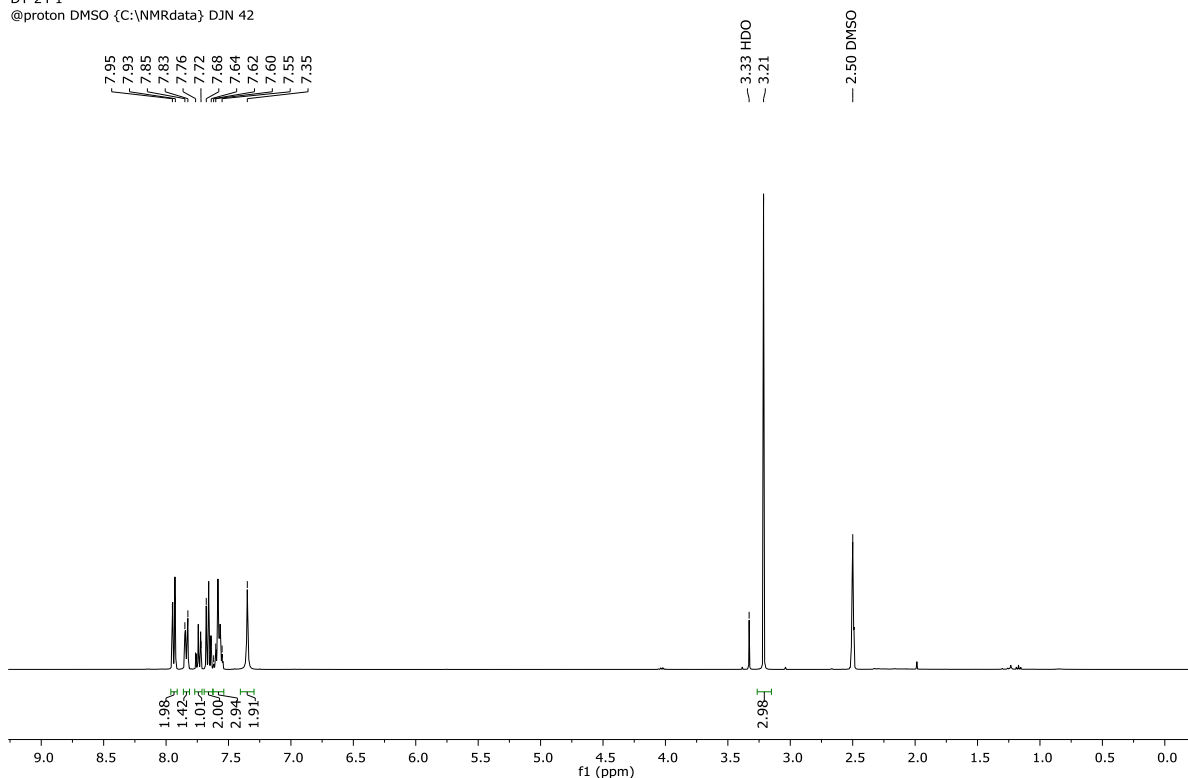

**Figure S118.**  $^1\text{H}$  NMR (400 MHz,  $\text{DMSO-}d_6$ ) of the competition experiment between benzenesulfonamide and methylphenylsulfone (entry 1, Table S27).

D320159  
 Person kpb19112  
 DT-24-2  
 @proton DMSO {C:\NMRdata} DJN 43

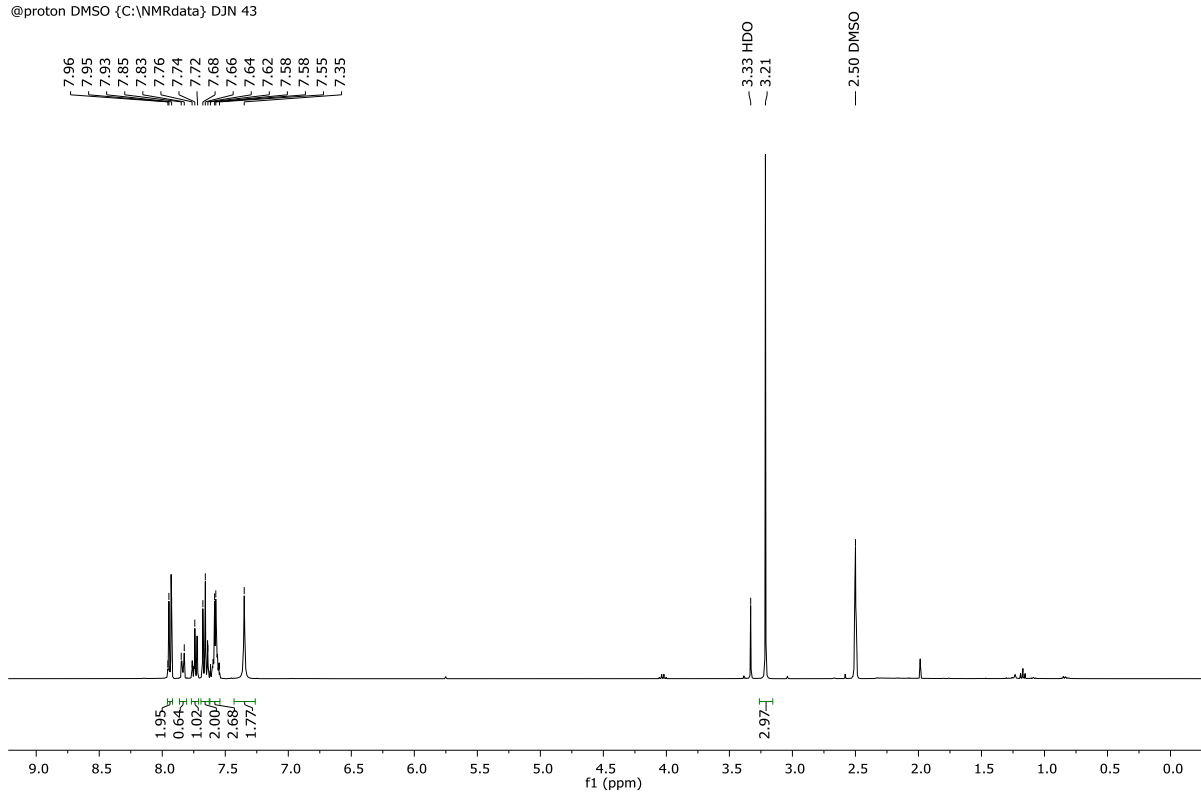

**Figure S119.**  $^1\text{H}$  NMR (400 MHz,  $\text{DMSO-}d_6$ ) of the competition experiment between benzenesulfonamide and methylphenylsulfone (entry 2, Table S27).

D320598  
 Person kpb19112  
 DT-24-4  
 @proton DMSO {C:\NMRdata\ DJN 30

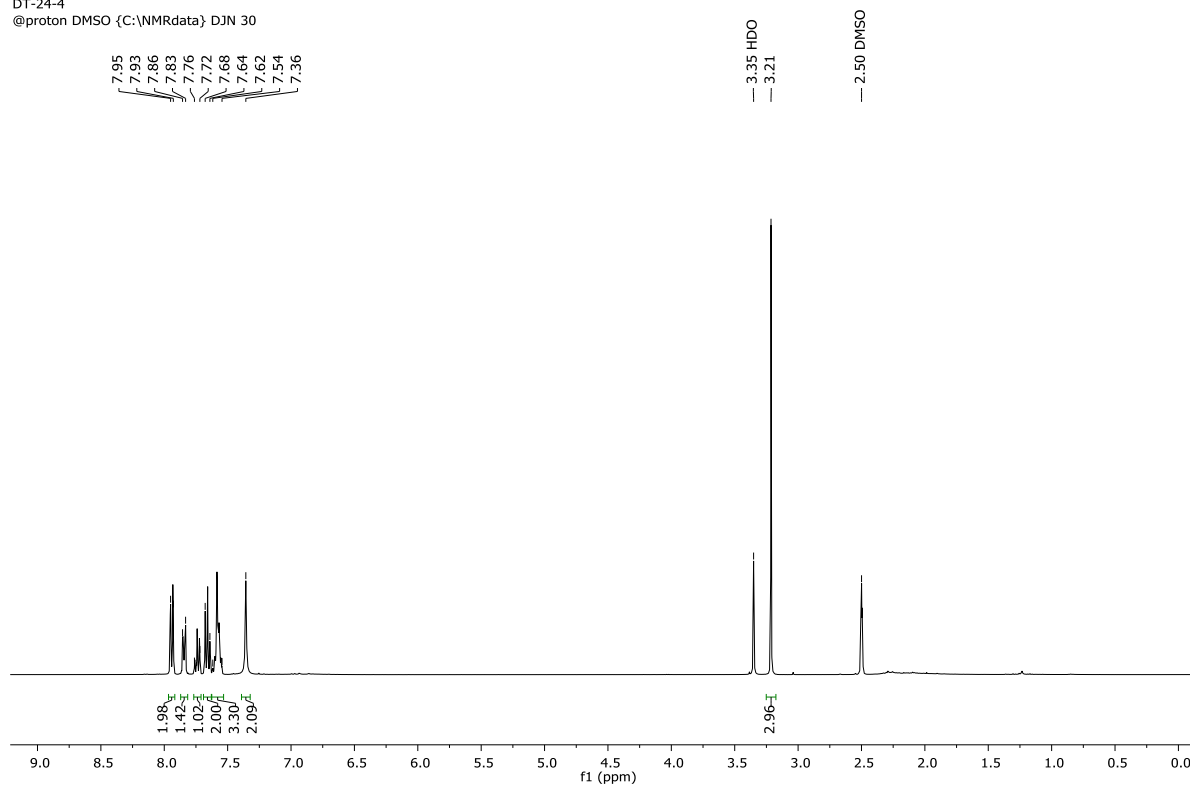

**Figure S120.**  $^1\text{H}$  NMR (400 MHz,  $\text{DMSO}-d_6$ ) of the competition experiment between benzenesulfonamide and methylphenylsulfone (entry 3, Table S27).

**Table S28.** Determination of the competition rate constant  $\kappa$  from the labelling experiment between 1-phenylpyrazole and acetophenone.

|                                                                                                                                                                                                                                                                                                                                                                           | Substrate <b>R1</b>                                                               | Substrate <b>R2</b>                                                               | Catalyst                         |                              |                              |                  |          |
|---------------------------------------------------------------------------------------------------------------------------------------------------------------------------------------------------------------------------------------------------------------------------------------------------------------------------------------------------------------------------|-----------------------------------------------------------------------------------|-----------------------------------------------------------------------------------|----------------------------------|------------------------------|------------------------------|------------------|----------|
|                                                                                                                                                                                                                                                                                                                                                                           | 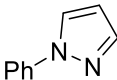 |  | <b>Ir-2</b><br>[(COD)Ir(IMes)Cl] |                              |                              |                  |          |
| Mass                                                                                                                                                                                                                                                                                                                                                                      | 14.4 mg                                                                           | 12.0 mg                                                                           | 3.2 mg                           |                              |                              |                  |          |
| Deuteration expected at $\delta$ ( <b>R1</b> ) = 7.73 – 7.69 ppm and at $\delta$ ( <b>R2</b> ) = 7.98 – 7.94 ppm                                                                                                                                                                                                                                                          |                                                                                   |                                                                                   |                                  |                              |                              |                  |          |
| Determined against integral at $\delta$ ( <b>R1</b> ) = 6.48 – 6.42 ppm and at $\delta$ ( <b>R2</b> ) = 2.60 ppm                                                                                                                                                                                                                                                          |                                                                                   |                                                                                   |                                  |                              |                              |                  |          |
| <i>Spectral details of the deuterated reaction mixture:</i>                                                                                                                                                                                                                                                                                                               |                                                                                   |                                                                                   |                                  |                              |                              |                  |          |
| <sup>1</sup> H NMR (400 MHz, CDCl <sub>3</sub> ) $\delta$ = 7.98 – 7.94 (m, 2H/D <b>R2</b> ), 7.92 (d, $J$ = 2.4 Hz, 1H, <b>R1</b> ), 7.75 – 7.67 (m, 2H/D <b>R1</b> and 1H, <b>R1</b> ), 7.60 – 7.53 (m, 1H, <b>R2</b> ), 7.49 – 7.42 (m, 2H, <b>R1</b> and 2H, <b>R2</b> ), 7.31 – 7.26 (m, 1H, <b>R1</b> ), 6.48 – 6.45 (m, 1H, <b>R1</b> ), 2.60 (s, 3H, <b>R2</b> ). |                                                                                   |                                                                                   |                                  |                              |                              |                  |          |
| Entry                                                                                                                                                                                                                                                                                                                                                                     | I <sub>R1(t)</sub><br>N = 2H                                                      | I <sub>R1(0)</sub><br>N = 1H                                                      | %D <sub>R1</sub>                 | I <sub>R2(t)</sub><br>N = 2H | I <sub>R2(0)</sub><br>N = 3H | %D <sub>R2</sub> | $\kappa$ |
| <b>1</b>                                                                                                                                                                                                                                                                                                                                                                  | 0.99 <sup>a</sup>                                                                 | 1.03                                                                              | 52                               | 1.95                         | 3.00                         | 3                | 28.94    |
| <b>2</b>                                                                                                                                                                                                                                                                                                                                                                  | 0.91 <sup>b</sup>                                                                 | 1.43                                                                              | 68                               | 1.92                         | 3.00                         | 4                | 28.05    |
| <b>3</b>                                                                                                                                                                                                                                                                                                                                                                  | 0.93 <sup>c</sup>                                                                 | 1.05                                                                              | 56                               | 1.95                         | 3.00                         | 3                | 32.17    |
| <b>Average <math>\kappa</math> = 29.72</b>                                                                                                                                                                                                                                                                                                                                |                                                                                   |                                                                                   |                                  |                              |                              |                  |          |
| <sup>a</sup> I <sub>R1(t)</sub> = 2.02 – 1.03; <sup>b</sup> I <sub>R1(t)</sub> = 2.34 – 1.43; <sup>c</sup> I <sub>R1(t)</sub> = 1.98 – 1.05;                                                                                                                                                                                                                              |                                                                                   |                                                                                   |                                  |                              |                              |                  |          |

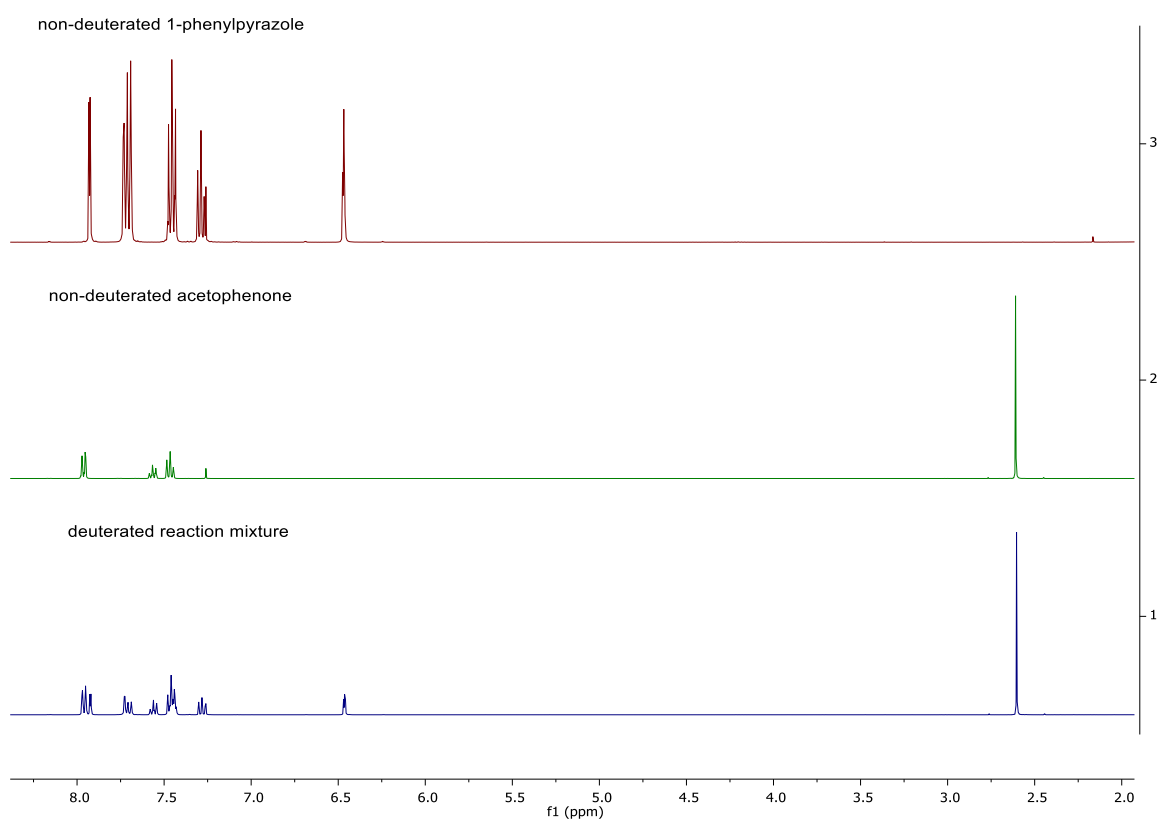

**Figure S121.** Stacked <sup>1</sup>H NMR (400 MHz, CDCl<sub>3</sub>) of non-deuterated substrates and reaction mixture.

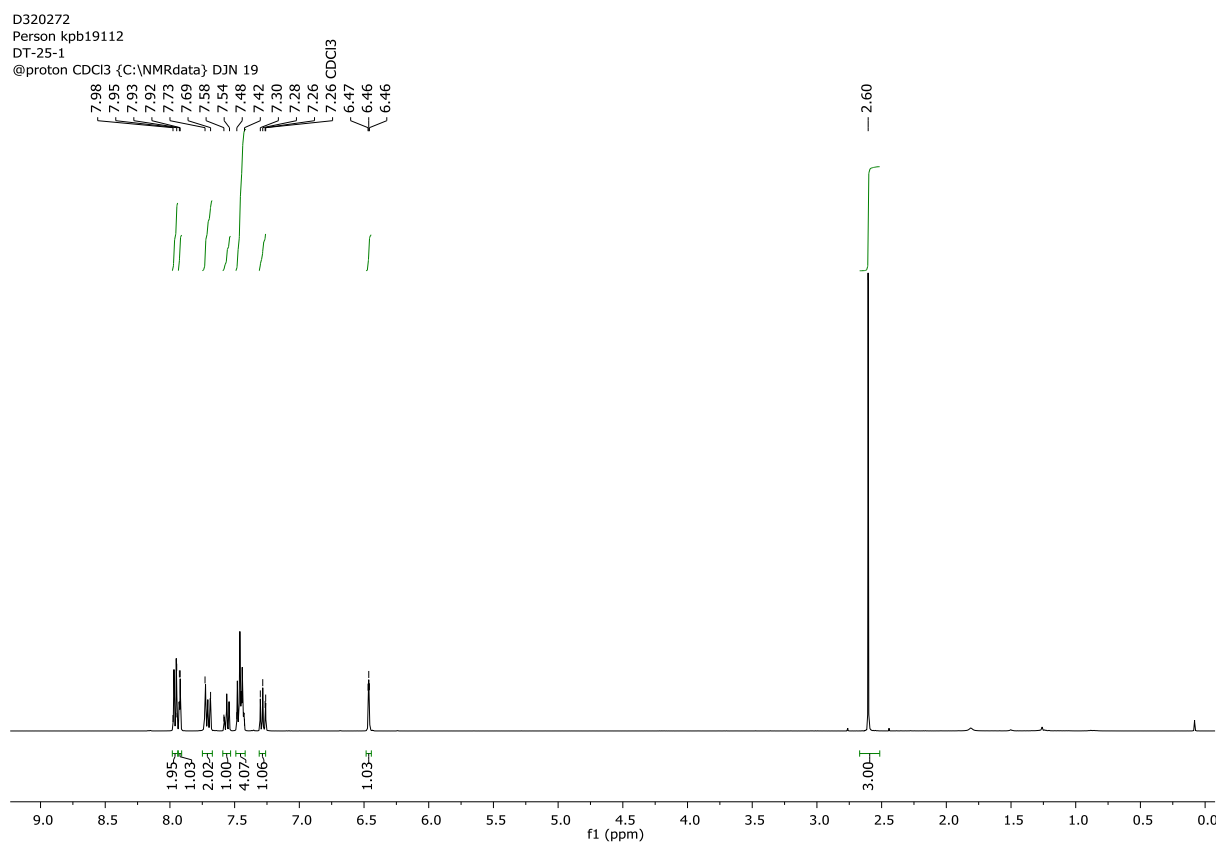

**Figure S122.**  $^1\text{H}$  NMR (400 MHz,  $\text{CDCl}_3$ ) of the competition experiment between 1-phenylpyrazole and acetophenone (entry 1, Table S28).

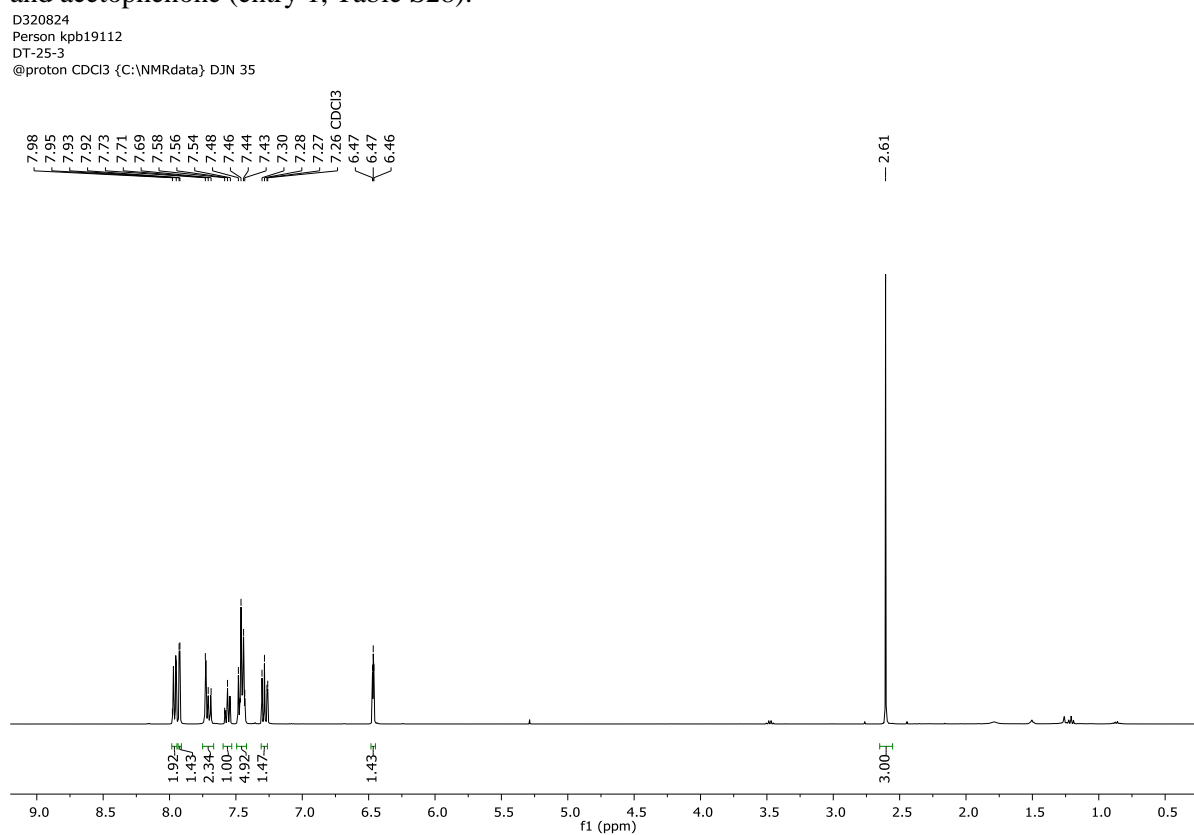

**Figure S123.**  $^1\text{H}$  NMR (400 MHz,  $\text{CDCl}_3$ ) of the competition experiment between 1-phenylpyrazole and acetophenone (entry 2, Table S28).

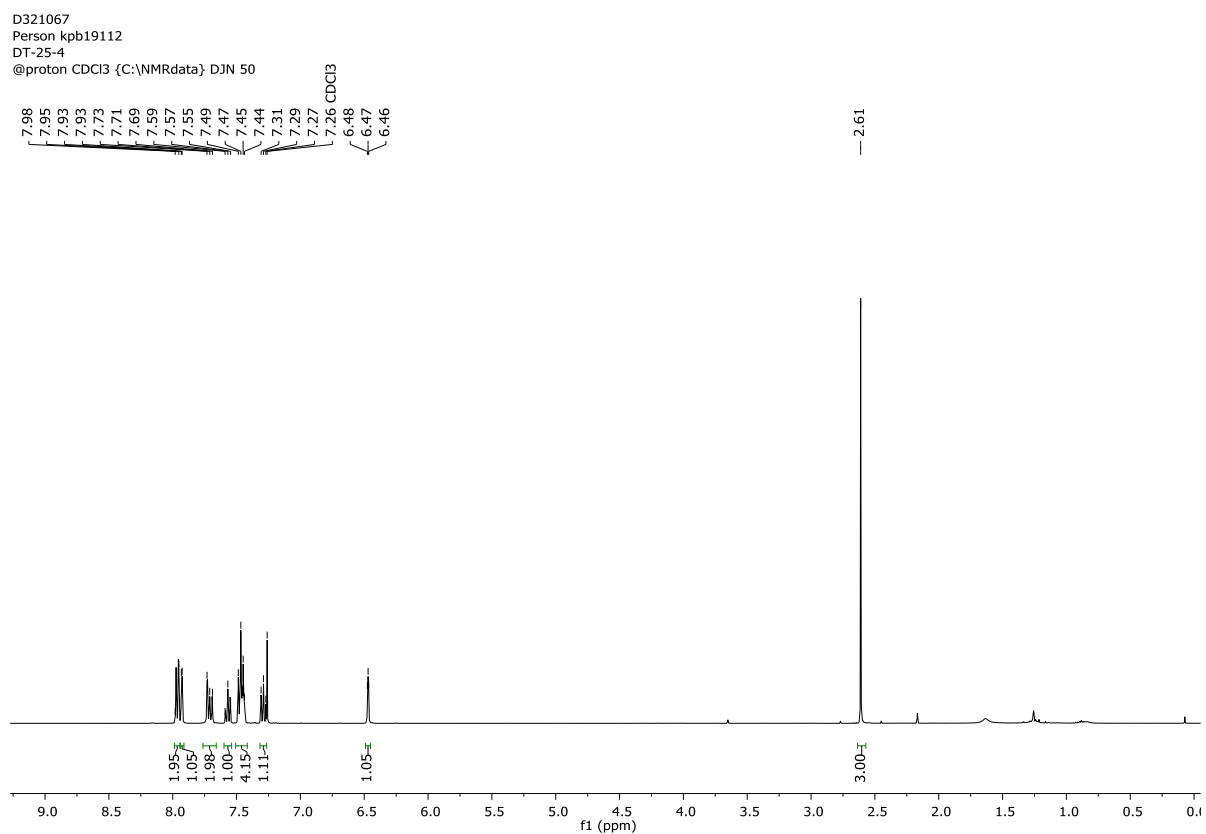

**Figure S124.**  $^1\text{H}$  NMR (400 MHz,  $\text{CDCl}_3$ ) of the competition experiment between 1-phenylpyrazole and acetophenone (entry 3, Table S28).

**Table S29.** Determination of the competition rate constant  $\kappa$  from the labelling experiment between 1-phenylpyrazole and 2-phenylpyridine.

|                                                                                                                                                                                                                                                                                                                                                                                            | Substrate <b>R1</b>                                                               | Substrate <b>R2</b>                                                               | Catalyst                         |                              |                              |                  |          |
|--------------------------------------------------------------------------------------------------------------------------------------------------------------------------------------------------------------------------------------------------------------------------------------------------------------------------------------------------------------------------------------------|-----------------------------------------------------------------------------------|-----------------------------------------------------------------------------------|----------------------------------|------------------------------|------------------------------|------------------|----------|
|                                                                                                                                                                                                                                                                                                                                                                                            | 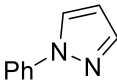 |  | <b>Ir-2</b><br>[(COD)Ir(IMes)Cl] |                              |                              |                  |          |
| Mass                                                                                                                                                                                                                                                                                                                                                                                       | 14.4 mg                                                                           | 15.5 mg                                                                           | 3.2 mg                           |                              |                              |                  |          |
| Deuteration expected at $\delta$ ( <b>R1</b> ) = 7.78 – 7.67 ppm and at $\delta$ ( <b>R2</b> ) = 8.04 – 7.97 ppm                                                                                                                                                                                                                                                                           |                                                                                   |                                                                                   |                                  |                              |                              |                  |          |
| Determined against integral at $\delta$ ( <b>R1</b> ) = 6.50 – 6.42 ppm and at $\delta$ ( <b>R2</b> ) = 8.72 – 8.68 ppm                                                                                                                                                                                                                                                                    |                                                                                   |                                                                                   |                                  |                              |                              |                  |          |
| <i>Spectral details of the deuterated reaction mixture:</i>                                                                                                                                                                                                                                                                                                                                |                                                                                   |                                                                                   |                                  |                              |                              |                  |          |
| <sup>1</sup> H NMR (400 MHz, CDCl <sub>3</sub> ) $\delta$ = 8.72 – 8.68 (m, 1H, <b>R2</b> ), 8.04 – 7.97 (m, 2H/D <b>R2</b> ), 7.92 (d, $J$ = 2.4 Hz, 1H, <b>R1</b> ), 7.78 – 7.67 (m, 2H, <b>R2</b> , 1H, <b>R1</b> , 2H/D <b>R1</b> ), 7.52 – 7.38 (3H, <b>R2</b> and 2H, <b>R1</b> ), 7.31 – 7.26 (m, 1H, <b>R1</b> ), 7.24 – 7.20 (m, 1H, <b>R2</b> ), 6.50 – 6.42 (m, 1H, <b>R1</b> ) |                                                                                   |                                                                                   |                                  |                              |                              |                  |          |
| Entry                                                                                                                                                                                                                                                                                                                                                                                      | I <sub>R1(t)</sub><br>N = 2H                                                      | I <sub>R1(0)</sub><br>N = 1H                                                      | %D <sub>R1</sub>                 | I <sub>R2(t)</sub><br>N = 2H | I <sub>R2(0)</sub><br>N = 1H | %D <sub>R2</sub> | $\kappa$ |
| <b>1</b>                                                                                                                                                                                                                                                                                                                                                                                   | 1.65 <sup>a</sup>                                                                 | 1.00                                                                              | 18                               | 1.75                         | 1.00                         | 13               | 1.44     |
| <b>2</b>                                                                                                                                                                                                                                                                                                                                                                                   | 1.29 <sup>b</sup>                                                                 | 1.00                                                                              | 36                               | 1.22                         | 0.85                         | 28               | 1.32     |
| <b>3</b>                                                                                                                                                                                                                                                                                                                                                                                   | 1.23 <sup>c</sup>                                                                 | 1.00                                                                              | 39                               | 1.32                         | 0.94                         | 30               | 1.37     |
| <b>Average <math>\kappa</math> = 1.38</b>                                                                                                                                                                                                                                                                                                                                                  |                                                                                   |                                                                                   |                                  |                              |                              |                  |          |
| <sup>a</sup> I <sub>R1(t)</sub> =4.65–1.00–(1.00×2); <sup>b</sup> I <sub>R1(t)</sub> =3.99–1.00–(0.85×2); <sup>c</sup> I <sub>R1(t)</sub> =4.11–1.00–(0.94×2)                                                                                                                                                                                                                              |                                                                                   |                                                                                   |                                  |                              |                              |                  |          |

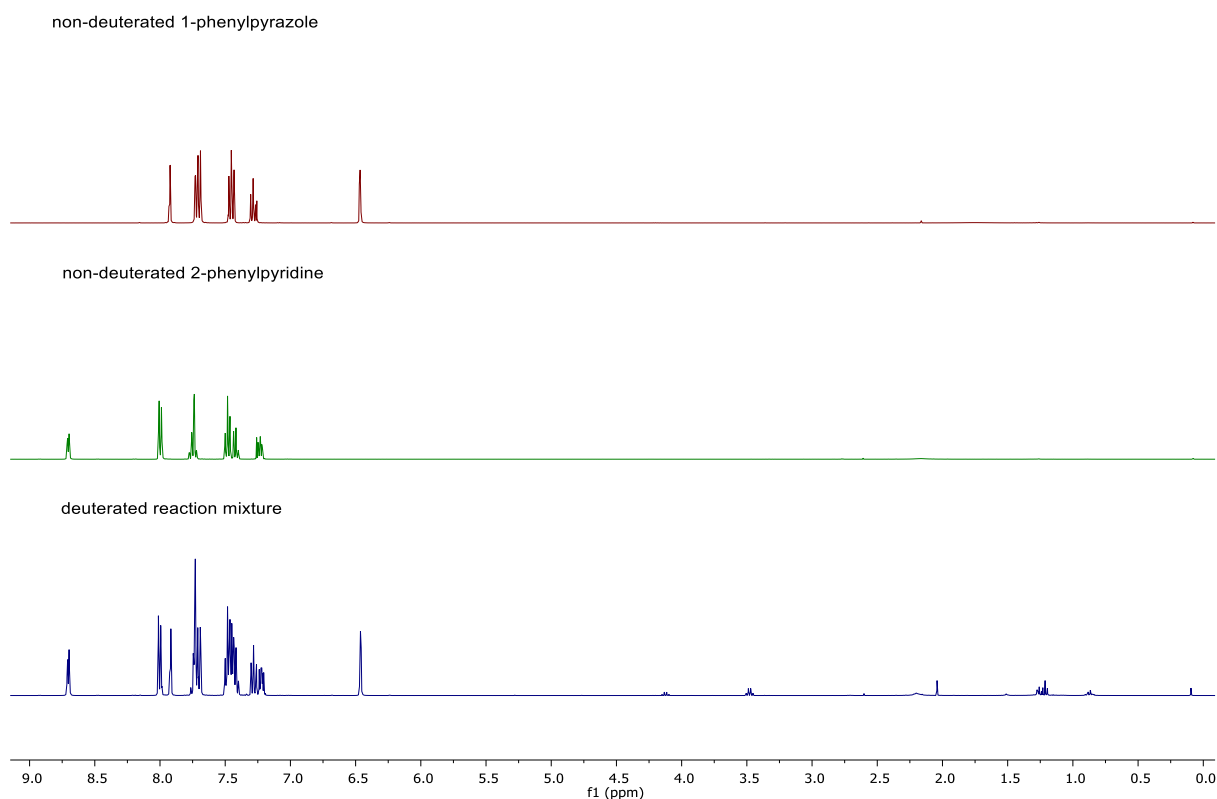

**Figure S125.** Stacked <sup>1</sup>H NMR (400 MHz, CDCl<sub>3</sub>) of non-deuterated substrates and reaction mixture.



D319184  
 Person kpb19112  
 DT-19-3  
 @proton CDCl3 {C:\NMRdata} DJN 44

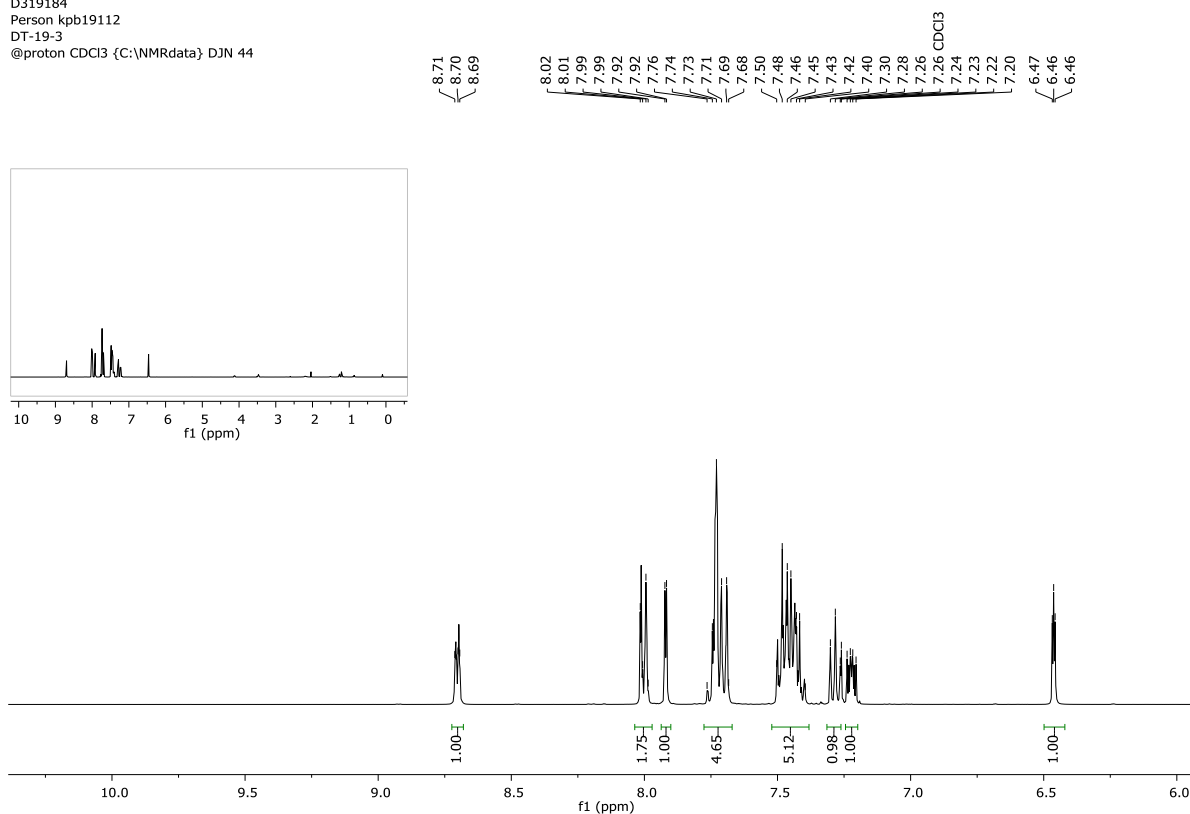

**Figure S126.**  $^1\text{H}$  NMR (400 MHz,  $\text{CDCl}_3$ ) of the competition experiment between 1-phenylpyrazole and 2-phenylpyridine (entry 1, Table S29).

D320015  
 Person kpb19112  
 DT-19-5  
 @proton CDCl3 {C:\NMRdata} DJN 51

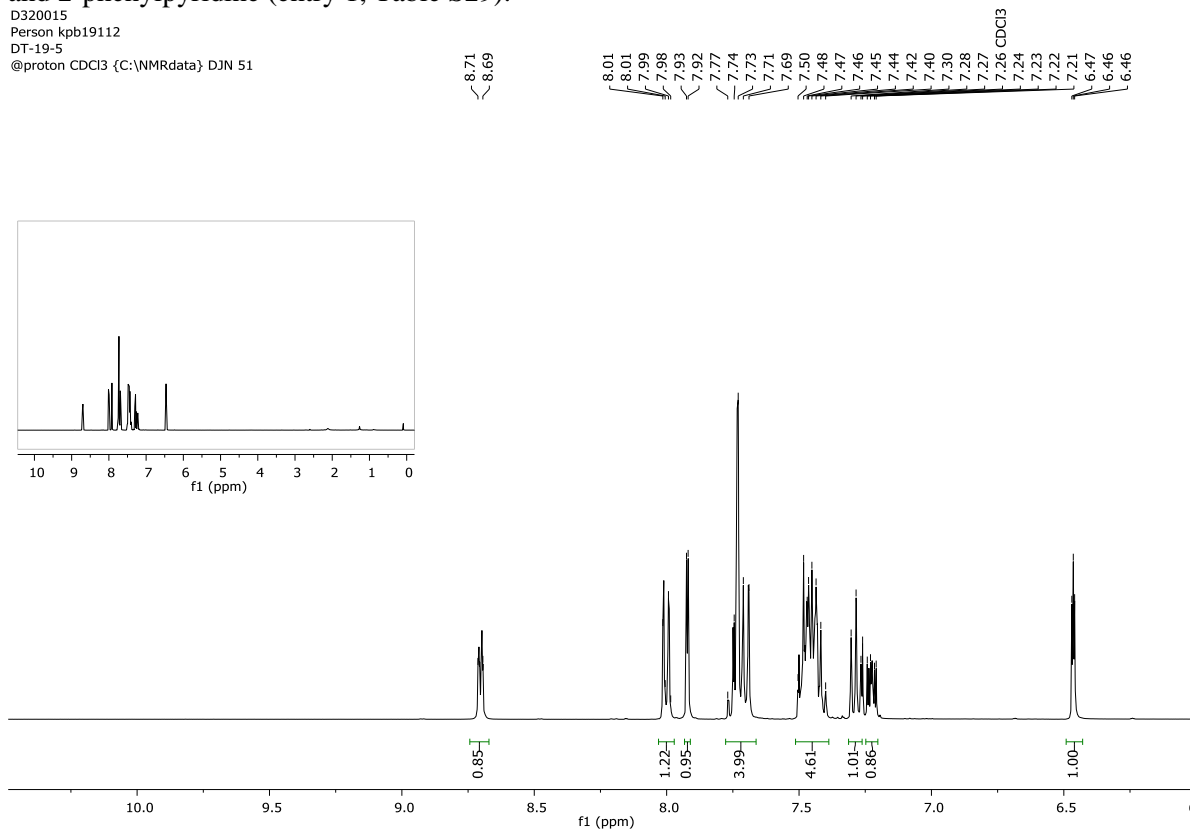

**Figure S127.**  $^1\text{H}$  NMR (400 MHz,  $\text{CDCl}_3$ ) of the competition experiment between 1-phenylpyrazole and 2-phenylpyridine (entry 2, Table S29).

D321273  
 Person kpb19112  
 DT-19-8  
 @proton CDCl3 {C:\NMRdata} DJN 45

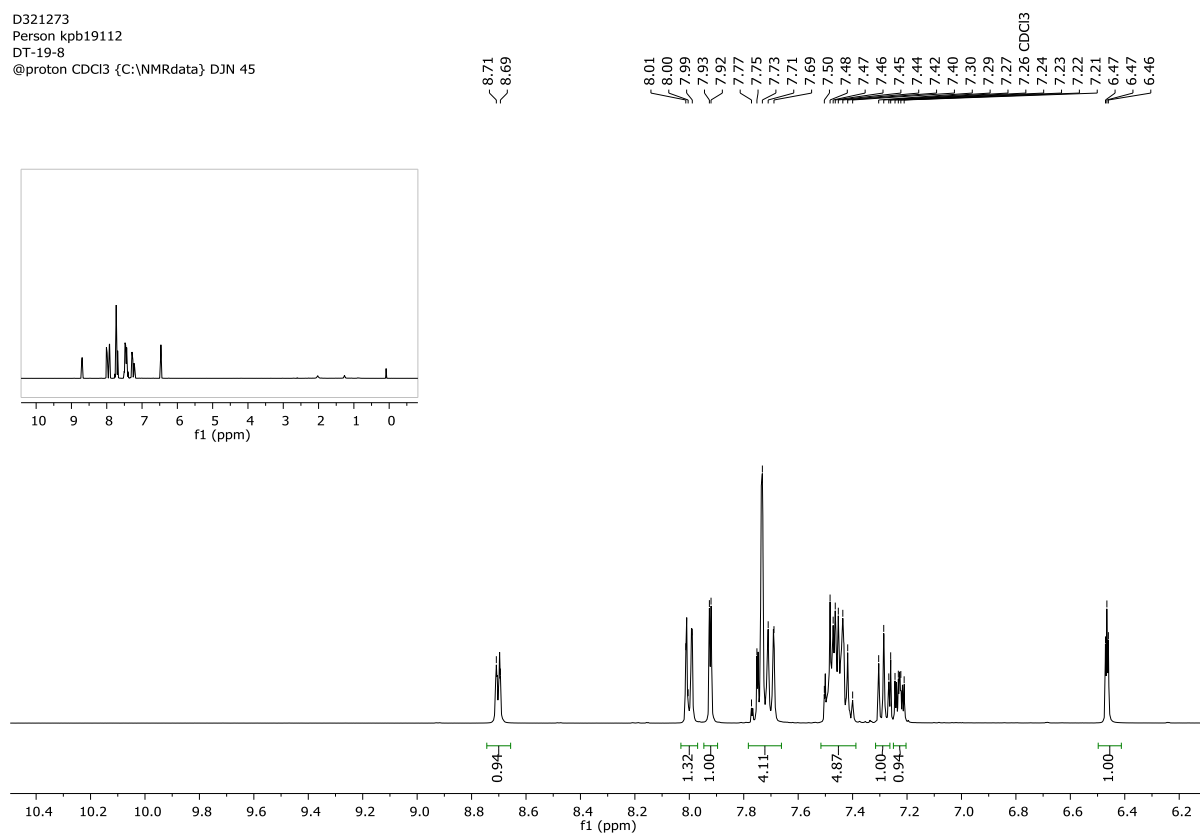

**Figure S128.** <sup>1</sup>H NMR (400 MHz, CDCl<sub>3</sub>) of the competition experiment between 1-phenylpyrazole and 2-phenylpyridine (entry 3, Table S29).

**Table S30.** Determination of the competition rate constant  $\kappa$  from the labelling experiment between 2-phenyloxazoline and 2-phenylpyridine.

|                                                                                                                                                                                                                                                                                                                                                                  | Substrate <b>R1</b>                                                               | Substrate <b>R2</b>                                                               | Catalyst                         |                              |                              |                  |          |
|------------------------------------------------------------------------------------------------------------------------------------------------------------------------------------------------------------------------------------------------------------------------------------------------------------------------------------------------------------------|-----------------------------------------------------------------------------------|-----------------------------------------------------------------------------------|----------------------------------|------------------------------|------------------------------|------------------|----------|
|                                                                                                                                                                                                                                                                                                                                                                  | 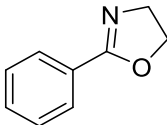 |  | <b>Ir-2</b><br>[(COD)Ir(IMes)Cl] |                              |                              |                  |          |
| Mass                                                                                                                                                                                                                                                                                                                                                             | 14.7 mg                                                                           | 15.5 mg                                                                           | 3.2 mg                           |                              |                              |                  |          |
| Deuteration expected at $\delta$ ( <b>R1</b> ) = 7.97 – 7.92 ppm and at $\delta$ ( <b>R2</b> ) = 8.02 – 7.97 ppm                                                                                                                                                                                                                                                 |                                                                                   |                                                                                   |                                  |                              |                              |                  |          |
| Determined against integral at $\delta$ ( <b>R1</b> ) = 4.44 ppm and at $\delta$ ( <b>R2</b> ) = 8.73 – 8.66 ppm                                                                                                                                                                                                                                                 |                                                                                   |                                                                                   |                                  |                              |                              |                  |          |
| <i>Spectral details of the deuterated reaction mixture:</i>                                                                                                                                                                                                                                                                                                      |                                                                                   |                                                                                   |                                  |                              |                              |                  |          |
| $^1\text{H}$ NMR (400 MHz, $\text{CDCl}_3$ ) $\delta$ = 8.73 – 8.66 (m, 1H, <b>R2</b> ), 8.02 – 7.97 (m, 2H/D <b>R2</b> ), 7.97 – 7.92 (m, 2H/D <b>R1</b> ), 7.77 – 7.69 (m, 2H <b>R2</b> ), 7.52 – 7.37 (m, 3H, <b>R1</b> and 3H, <b>R2</b> ), 7.24 – 7.18 (m, 1H, <b>R2</b> ), 4.44 (t, $J$ = 9.5 Hz, 2H, <b>R1</b> ), 4.07 (t, $J$ = 9.5 Hz, 2H, <b>R1</b> ). |                                                                                   |                                                                                   |                                  |                              |                              |                  |          |
| Entry                                                                                                                                                                                                                                                                                                                                                            | $I_{\text{R1(t)}}$<br>N = 2H                                                      | $I_{\text{R1(0)}}$<br>N = 2H                                                      | %D <sub>R1</sub>                 | $I_{\text{R2(t)}}$<br>N = 2H | $I_{\text{R2(0)}}$<br>N = 1H | %D <sub>R2</sub> | $\kappa$ |
| <b>1</b>                                                                                                                                                                                                                                                                                                                                                         | 1.76                                                                              | 2.00                                                                              | 12                               | 2.95                         | 1.61                         | 8                | 1.46     |
| <b>2</b>                                                                                                                                                                                                                                                                                                                                                         | 1.52                                                                              | 2.00                                                                              | 24                               | 1.66                         | 1.02                         | 19               | 1.33     |
| <b>3</b>                                                                                                                                                                                                                                                                                                                                                         | 1.28                                                                              | 2.00                                                                              | 36                               | 2.02                         | 1.38                         | 27               | 1.43     |
| Average $\kappa$ = 1.41                                                                                                                                                                                                                                                                                                                                          |                                                                                   |                                                                                   |                                  |                              |                              |                  |          |

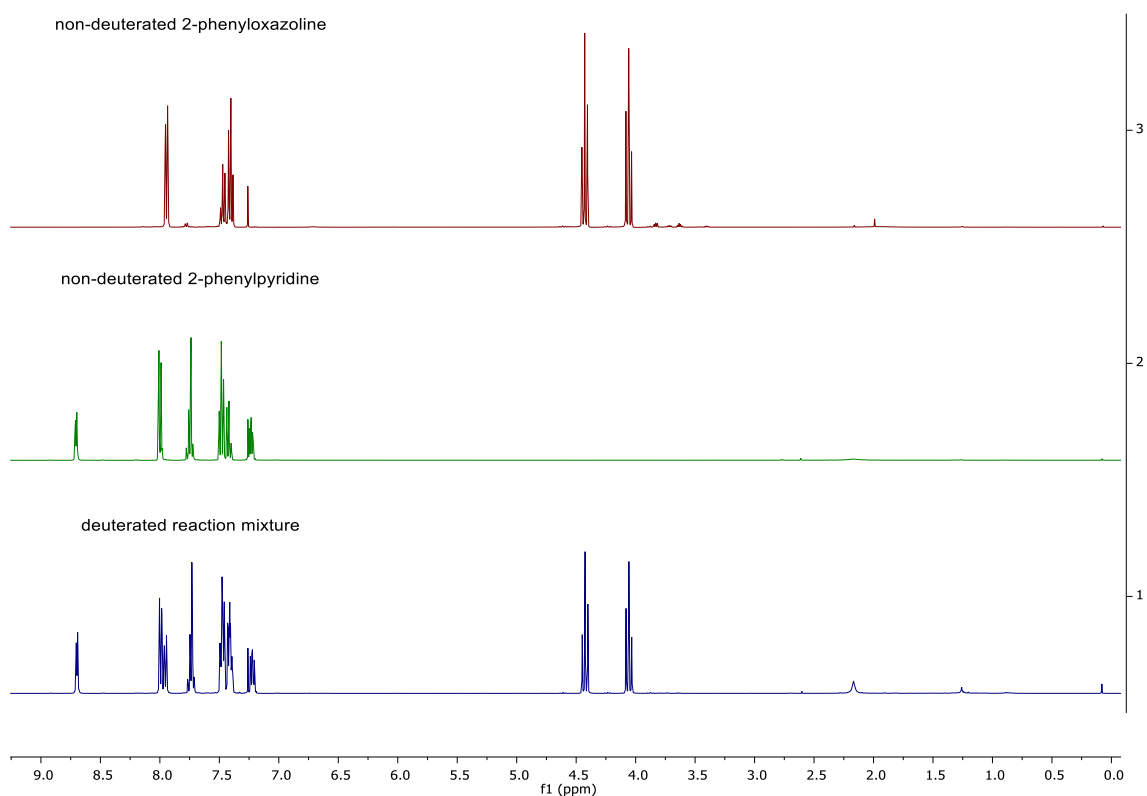

**Figure S129.** Stacked  $^1\text{H}$  NMR (400 MHz,  $\text{CDCl}_3$ ) of non-deuterated substrates and reaction mixture.

D319185  
 Person kpb19112  
 DT-21-2  
 @proton CDCl<sub>3</sub> {C:\NMRdata} DJN 45

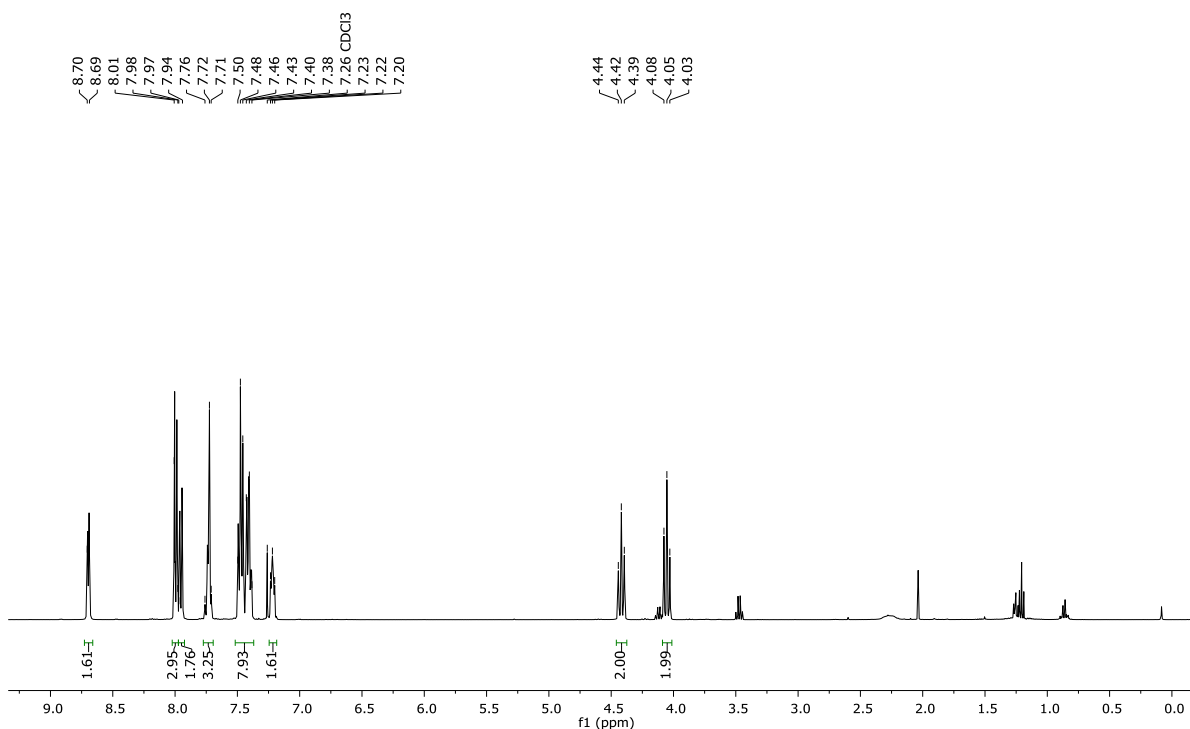

**Figure S130.** <sup>1</sup>H NMR (400 MHz, CDCl<sub>3</sub>) of the competition experiment between 2-phenyloxazoline and 2-phenylpyridine (entry 1, Table S30).

D321283  
 Person kpb19112  
 DT-21-4  
 @proton CDCl<sub>3</sub> {C:\NMRdata} DJN 55

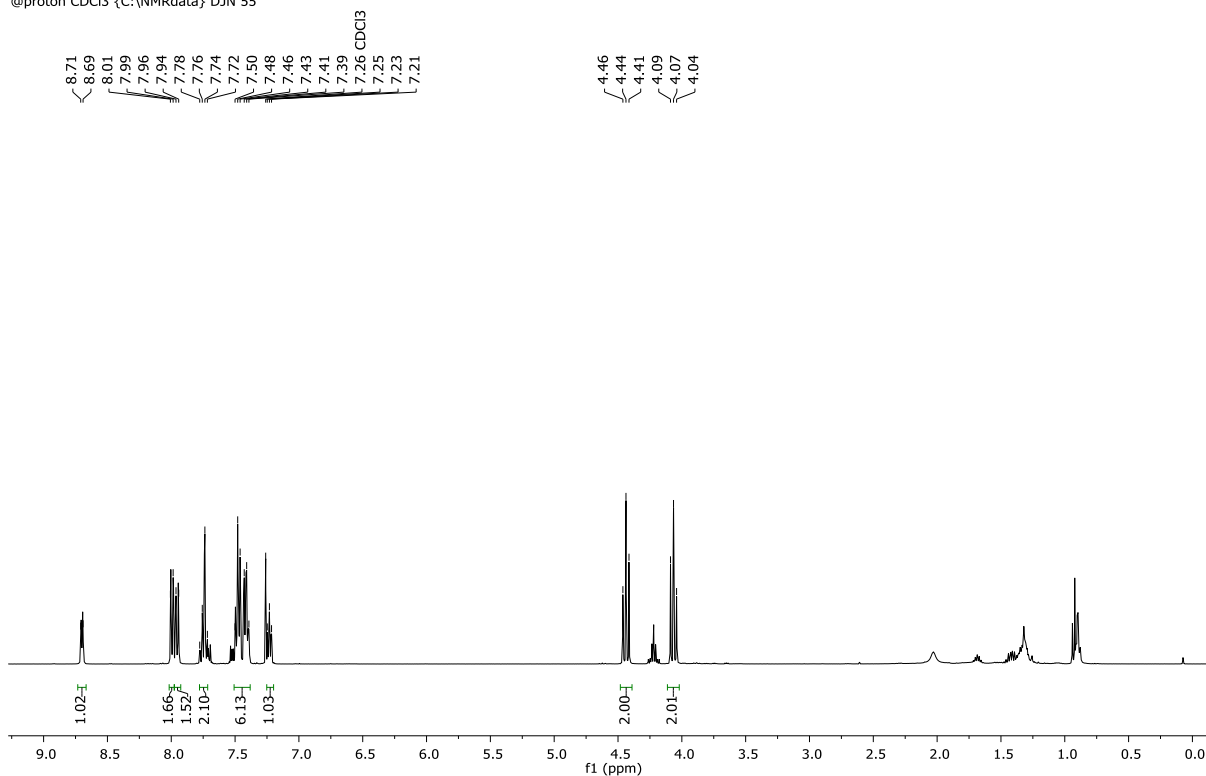

**Figure S131.** <sup>1</sup>H NMR (400 MHz, CDCl<sub>3</sub>) of the competition experiment between 2-phenyloxazoline and 2-phenylpyridine (entry 2, Table S30).

D321284  
 Person kpb19112  
 DT-21-5  
 @proton CDCl3 {C:\NMRdata\ DJN 56

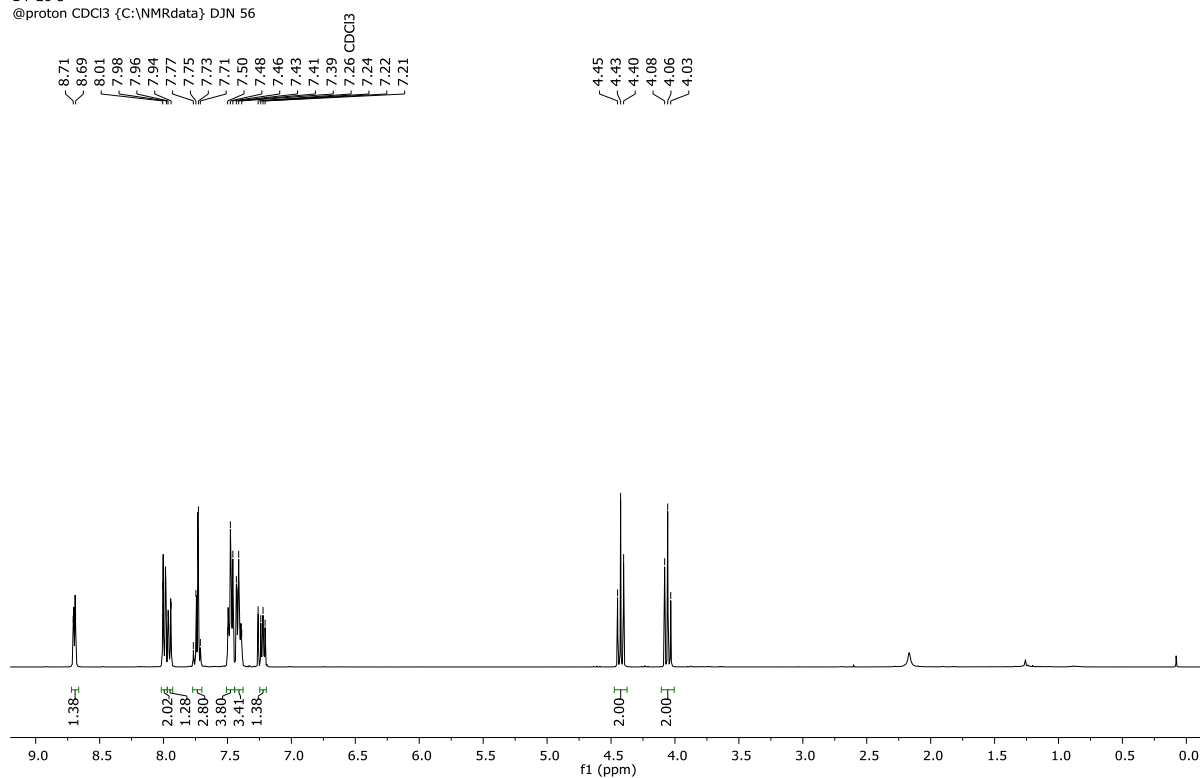

**Figure S132.** <sup>1</sup>H NMR (400 MHz, CDCl<sub>3</sub>) of the competition experiment between 2-phenyloxazoline and 2-phenylpyridine (entry 3, Table S30).

**Table S31.** Determination of the competition rate constant  $\kappa$  from the labelling experiment between 1-phenylpyrazole and 2-phenylthiazole.

|                                                                                                                                                                                                                                                                                                                                                                                                 | Substrate <b>R1</b>                                                               | Substrate <b>R2</b>                                                               | Catalyst                         |                              |                              |                  |          |
|-------------------------------------------------------------------------------------------------------------------------------------------------------------------------------------------------------------------------------------------------------------------------------------------------------------------------------------------------------------------------------------------------|-----------------------------------------------------------------------------------|-----------------------------------------------------------------------------------|----------------------------------|------------------------------|------------------------------|------------------|----------|
|                                                                                                                                                                                                                                                                                                                                                                                                 | 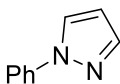 |  | <b>Ir-2</b><br>[(COD)Ir(IMes)Cl] |                              |                              |                  |          |
| Mass                                                                                                                                                                                                                                                                                                                                                                                            | 14.4 mg                                                                           | 16.1 mg                                                                           | 3.2 mg                           |                              |                              |                  |          |
| Deuteration expected at $\delta$ ( <b>R1</b> ) = 7.78 – 7.67 ppm and at $\delta$ ( <b>R2</b> ) = 8.02 – 7.96 ppm                                                                                                                                                                                                                                                                                |                                                                                   |                                                                                   |                                  |                              |                              |                  |          |
| Determined against integral at $\delta$ ( <b>R1</b> ) = 6.49 – 6.43 ppm and at $\delta$ ( <b>R2</b> ) = 7.88 ppm                                                                                                                                                                                                                                                                                |                                                                                   |                                                                                   |                                  |                              |                              |                  |          |
| <i>Spectral details of the deuterated reaction mixture:</i>                                                                                                                                                                                                                                                                                                                                     |                                                                                   |                                                                                   |                                  |                              |                              |                  |          |
| <sup>1</sup> H NMR (400 MHz, CDCl <sub>3</sub> ) $\delta$ = 8.02 – 7.96 (m, 2H/D, <b>R2</b> ), 7.92 (d, $J$ = 2.4 Hz, 1H, <b>R1</b> ), 7.88 (d, $J$ = 3.3 Hz, 1H, <b>R2</b> ), 7.76 – 7.66 (m, 2H/D, <b>R1</b> and 1H, <b>R1</b> ), 7.49 – 7.39 (m, 2H, <b>R1</b> and 3H, <b>R2</b> ), 7.33 (d, $J$ = 3.3 Hz, 1H, <b>R2</b> ), 7.29 (t, $J$ = 7.4 Hz, 1H, <b>R1</b> ), 6.49 – 6.43 (m, 1H, R1). |                                                                                   |                                                                                   |                                  |                              |                              |                  |          |
| Entry                                                                                                                                                                                                                                                                                                                                                                                           | I <sub>R1(t)</sub><br>N = 2H                                                      | I <sub>R1(0)</sub><br>N = 1H                                                      | %D <sub>R1</sub>                 | I <sub>R2(t)</sub><br>N = 2H | I <sub>R2(0)</sub><br>N = 1H | %D <sub>R2</sub> | $\kappa$ |
| <b>1</b>                                                                                                                                                                                                                                                                                                                                                                                        | 0.82 <sup>a</sup>                                                                 | 1.00                                                                              | 59                               | 1.25                         | 1.10                         | 43               | 1.58     |
| <b>2</b>                                                                                                                                                                                                                                                                                                                                                                                        | 1.12 <sup>b</sup>                                                                 | 1.00                                                                              | 44                               | 1.52                         | 1.05                         | 28               | 1.79     |
| <b>3</b>                                                                                                                                                                                                                                                                                                                                                                                        | 1.19 <sup>c</sup>                                                                 | 1.00                                                                              | 41                               | 1.41                         | 1.00                         | 30               | 1.49     |
| <b>Average <math>\kappa</math> = 1.62</b>                                                                                                                                                                                                                                                                                                                                                       |                                                                                   |                                                                                   |                                  |                              |                              |                  |          |
| <sup>a</sup> I <sub>R1(t)</sub> = 1.82–1.00; <sup>b</sup> I <sub>R1(t)</sub> = 2.12–1.00; <sup>c</sup> I <sub>R1(t)</sub> = 2.19–1.00;                                                                                                                                                                                                                                                          |                                                                                   |                                                                                   |                                  |                              |                              |                  |          |

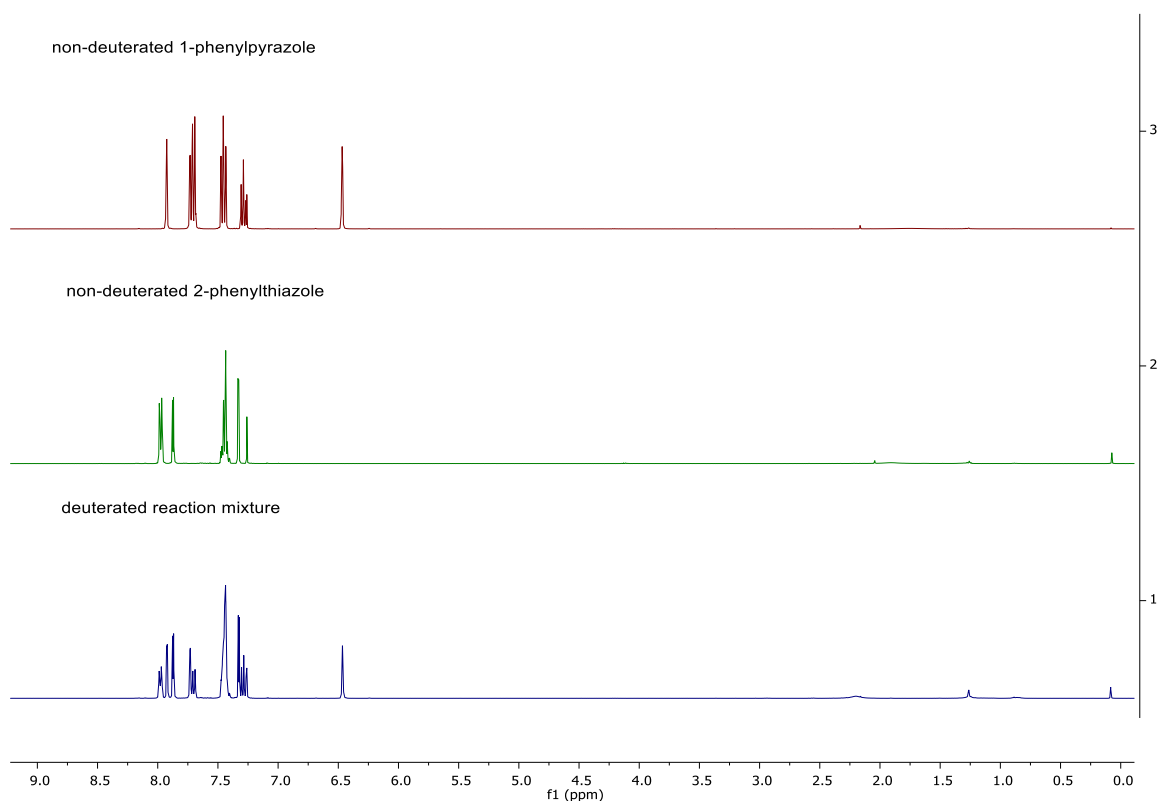

**Figure S133.** Stacked <sup>1</sup>H NMR (400 MHz, CDCl<sub>3</sub>) of non-deuterated substrates and reaction mixture.

D321928  
 Person kpb19112  
 DT-30-2  
 @proton CDCl3 {C:\NMRdata} DJN 22

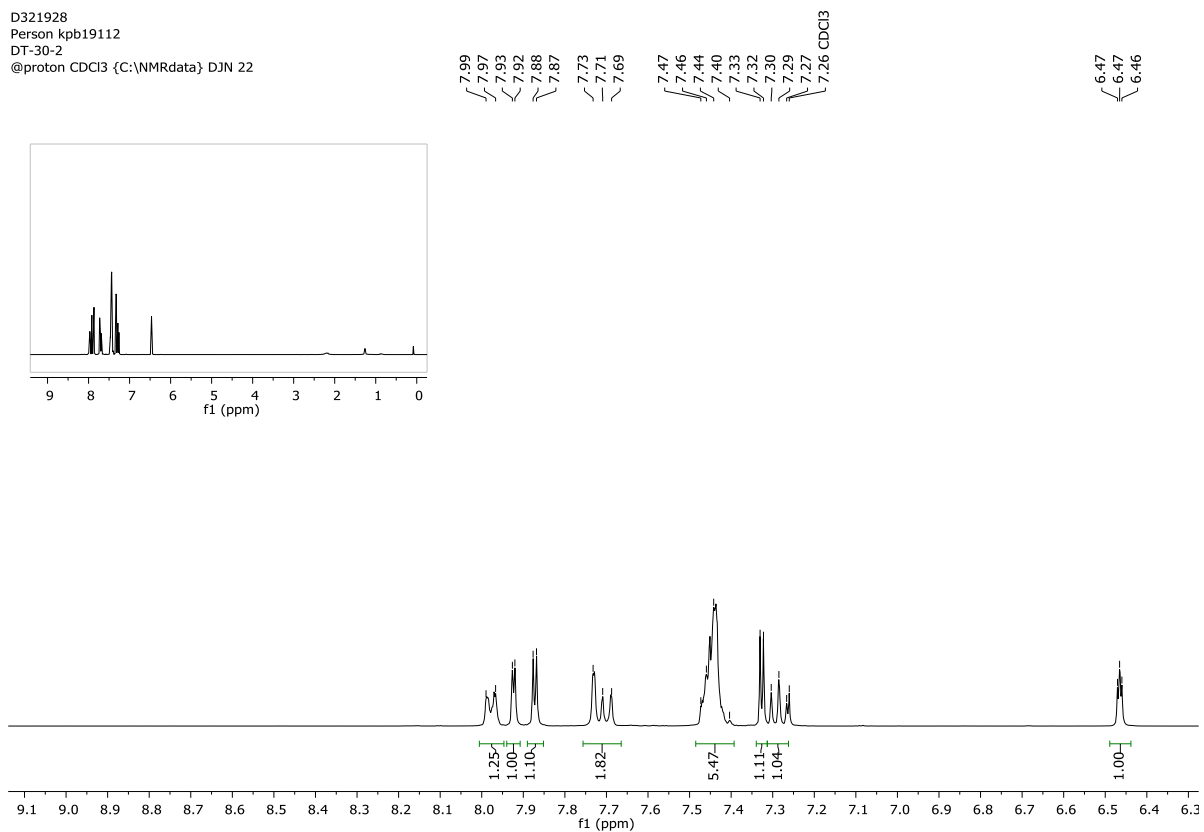

**Figure S134.**  $^1\text{H}$  NMR (400 MHz,  $\text{CDCl}_3$ ) of the competition experiment between 1-phenylpyrazole and 2-phenylthiazole (entry 1, Table S31).

D321929  
 Person kpb19112  
 DT-30-3  
 @proton CDCl3 {C:\NMRdata} DJN 23

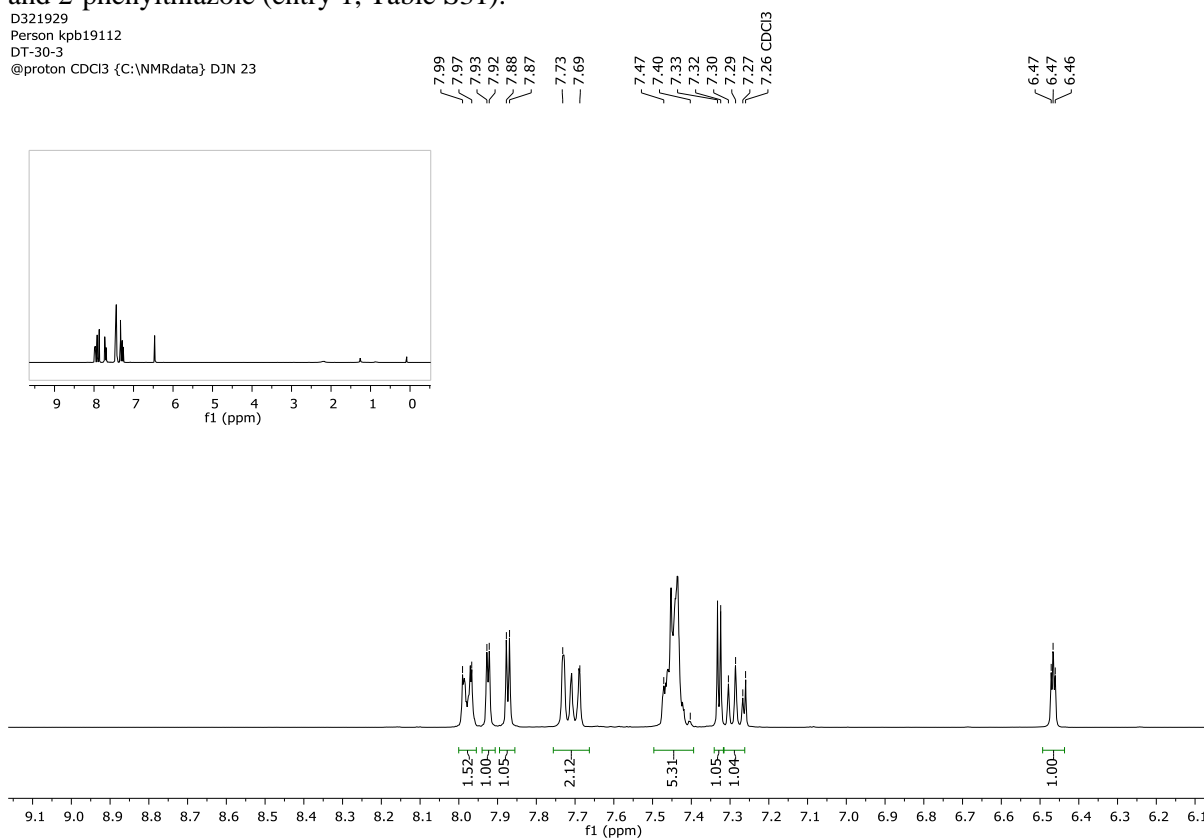

**Figure S135.**  $^1\text{H}$  NMR (400 MHz,  $\text{CDCl}_3$ ) of the competition experiment between 1-phenylpyrazole and 2-phenylthiazole (entry 1, Table S31).

D321930  
 Person kpb19112  
 DT-30-4  
 @proton CDCl3 {C:\NMRdata} DJN 24

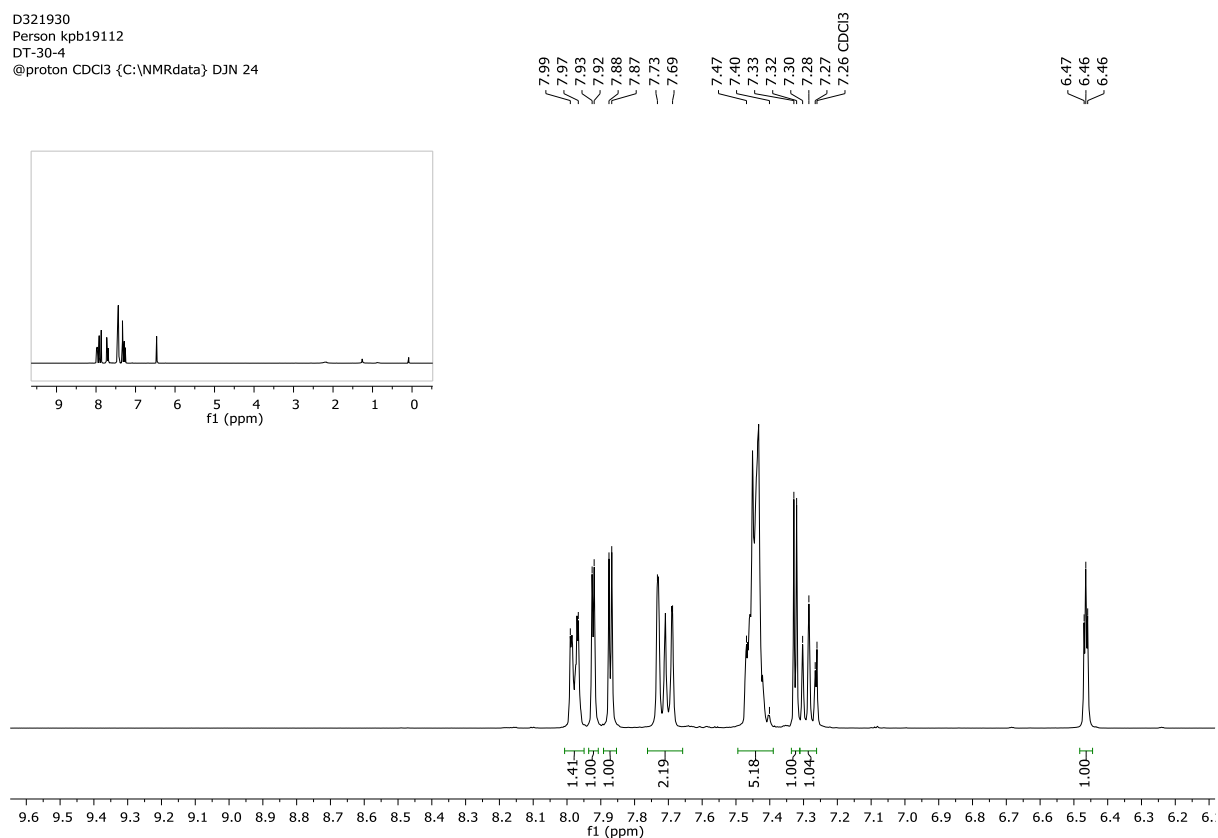

**Figure S136.** <sup>1</sup>H NMR (400 MHz, CDCl<sub>3</sub>) of the competition experiment between 1-phenylpyrazole and 2-phenylthiazole (entry 1, Table S31).



**Table S32.** Determination of the competition rate constant  $\kappa$  from the labelling experiment between 1-methyl-2-phenylimidazole and 2-phenylthiazole.

|                                                                                                                                                                                                                                                                                                                                                                               | Substrate <b>R1</b>                                                               | Substrate <b>R2</b>                                                               | Catalyst                         |                              |                              |                  |          |
|-------------------------------------------------------------------------------------------------------------------------------------------------------------------------------------------------------------------------------------------------------------------------------------------------------------------------------------------------------------------------------|-----------------------------------------------------------------------------------|-----------------------------------------------------------------------------------|----------------------------------|------------------------------|------------------------------|------------------|----------|
|                                                                                                                                                                                                                                                                                                                                                                               | 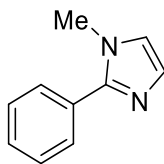 |  | <b>Ir-2</b><br>[(COD)Ir(IMes)Cl] |                              |                              |                  |          |
| Mass                                                                                                                                                                                                                                                                                                                                                                          | 15.8 mg                                                                           | 16.1 mg                                                                           | 3.2 mg                           |                              |                              |                  |          |
| Deuteration expected at $\delta$ ( <b>R1</b> ) = 7.67 – 7.61 ppm and at $\delta$ ( <b>R2</b> ) = 8.02 – 7.96 ppm                                                                                                                                                                                                                                                              |                                                                                   |                                                                                   |                                  |                              |                              |                  |          |
| Determined against integral at $\delta$ ( <b>R1</b> ) = 7.12 ppm and at $\delta$ ( <b>R2</b> ) = 7.88 ppm                                                                                                                                                                                                                                                                     |                                                                                   |                                                                                   |                                  |                              |                              |                  |          |
| <i>Spectral details of the deuterated reaction mixture:</i>                                                                                                                                                                                                                                                                                                                   |                                                                                   |                                                                                   |                                  |                              |                              |                  |          |
| <sup>1</sup> H NMR (400 MHz, CDCl <sub>3</sub> ) $\delta$ = 8.02 – 7.96 (m, 2H/D, <b>R2</b> ), 7.88 (d, $J$ = 3.3 Hz, 1H, <b>R2</b> ), 7.67 – 7.61 (m, 2H/D, <b>R1</b> ), 7.50 – 7.38 (m, 3H, <b>R1</b> and 3H, <b>R2</b> ), 7.33 (d, $J$ = 3.3 Hz, 1H, <b>R2</b> ), 7.12 (d, $J$ = 1.2 Hz, 1H, <b>R1</b> ), 6.95 (d, $J$ = 1.2 Hz, 1H, <b>R1</b> ), 3.74 (s, 3H, <b>R1</b> ) |                                                                                   |                                                                                   |                                  |                              |                              |                  |          |
| Entry                                                                                                                                                                                                                                                                                                                                                                         | I <sub>R1(t)</sub><br>N = 2H                                                      | I <sub>R1(0)</sub><br>N = 1H                                                      | %D <sub>R1</sub>                 | I <sub>R2(t)</sub><br>N = 2H | I <sub>R2(0)</sub><br>N = 1H | %D <sub>R2</sub> | $\kappa$ |
| <b>1</b>                                                                                                                                                                                                                                                                                                                                                                      | 1.10                                                                              | 1.00                                                                              | 45                               | 1.91                         | 1.00                         | 5                | 12.98    |
| <b>2</b>                                                                                                                                                                                                                                                                                                                                                                      | 0.63                                                                              | 1.00                                                                              | 69                               | 1.90                         | 1.03                         | 8                | 14.29    |
| <b>3</b>                                                                                                                                                                                                                                                                                                                                                                      | 0.71                                                                              | 1.00                                                                              | 65                               | 1.95                         | 1.06                         | 8                | 12.39    |
| Average $\kappa$ = 13.22                                                                                                                                                                                                                                                                                                                                                      |                                                                                   |                                                                                   |                                  |                              |                              |                  |          |

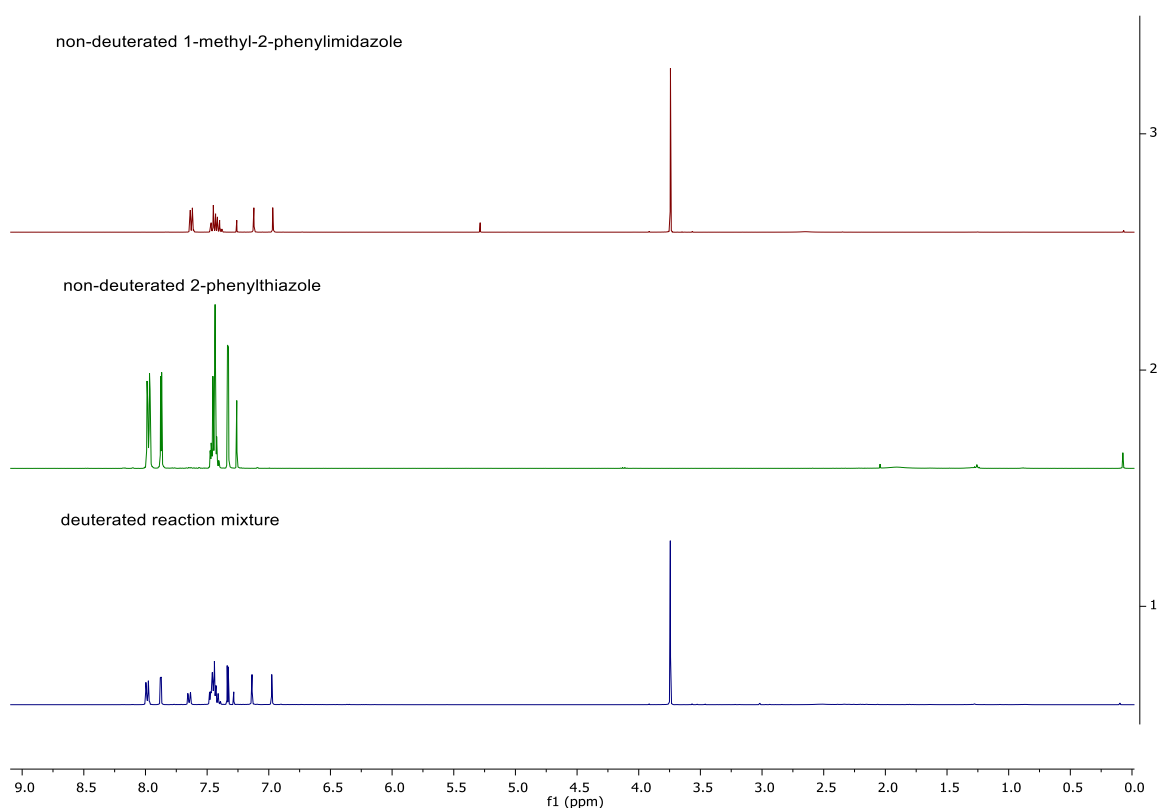

**Figure S137.** Stacked <sup>1</sup>H NMR (400 MHz, CDCl<sub>3</sub>) of non-deuterated substrates and reaction mixture.

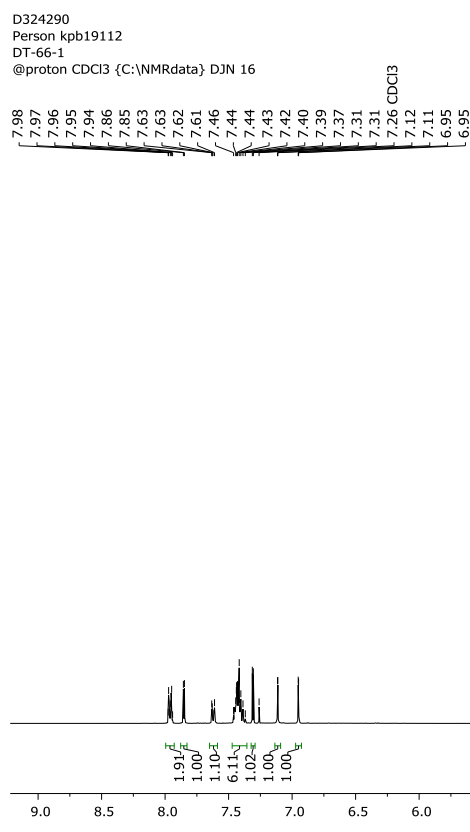

**Figure S138.**  $^1\text{H}$  NMR (400 MHz,  $\text{CDCl}_3$ ) of the competition experiment between 1-methyl-2-phenylimidazole and 2-phenylthiazole (entry 1, Table S32).

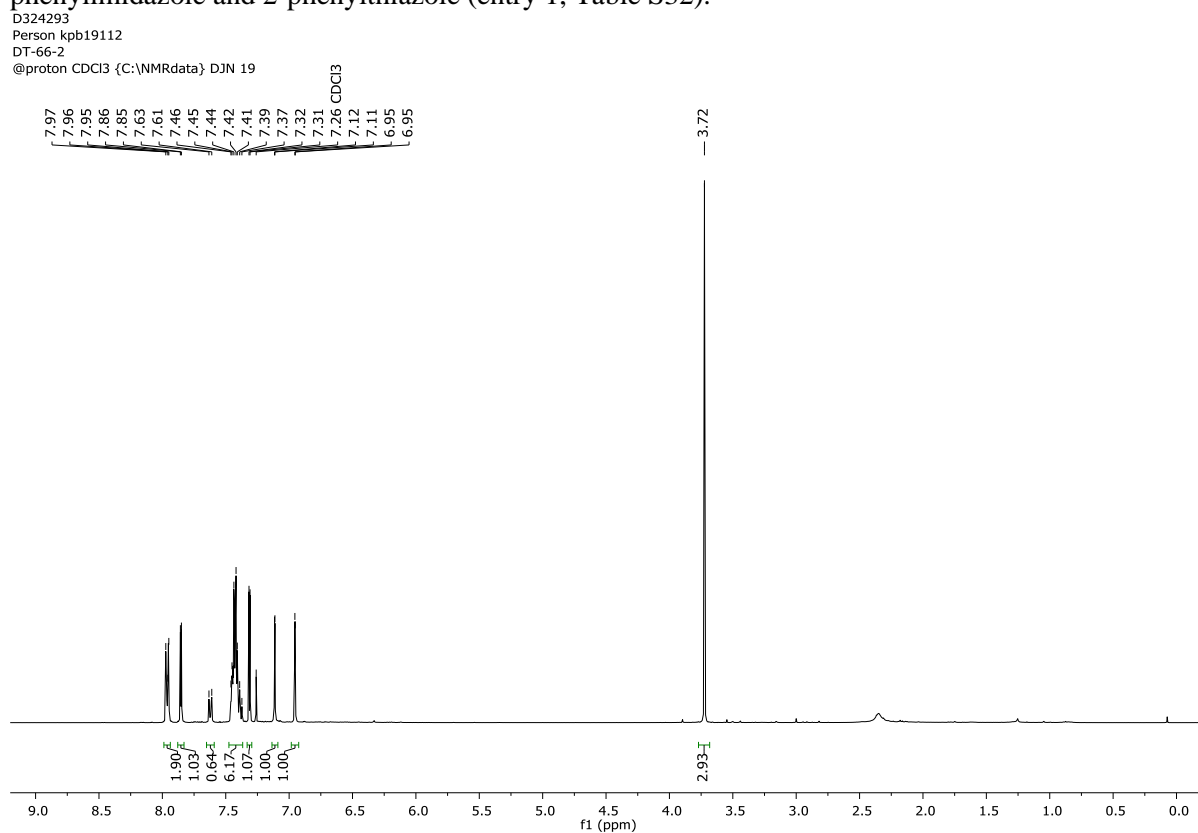

**Figure S139.**  $^1\text{H}$  NMR (400 MHz,  $\text{CDCl}_3$ ) of the competition experiment between 1-methyl-2-phenylimidazole and 2-phenylthiazole (entry 2, Table S32).

D324294  
 Person kpb19112  
 DT-66-3  
 @proton CDCl3 {C:\NMRdata} DJN 20

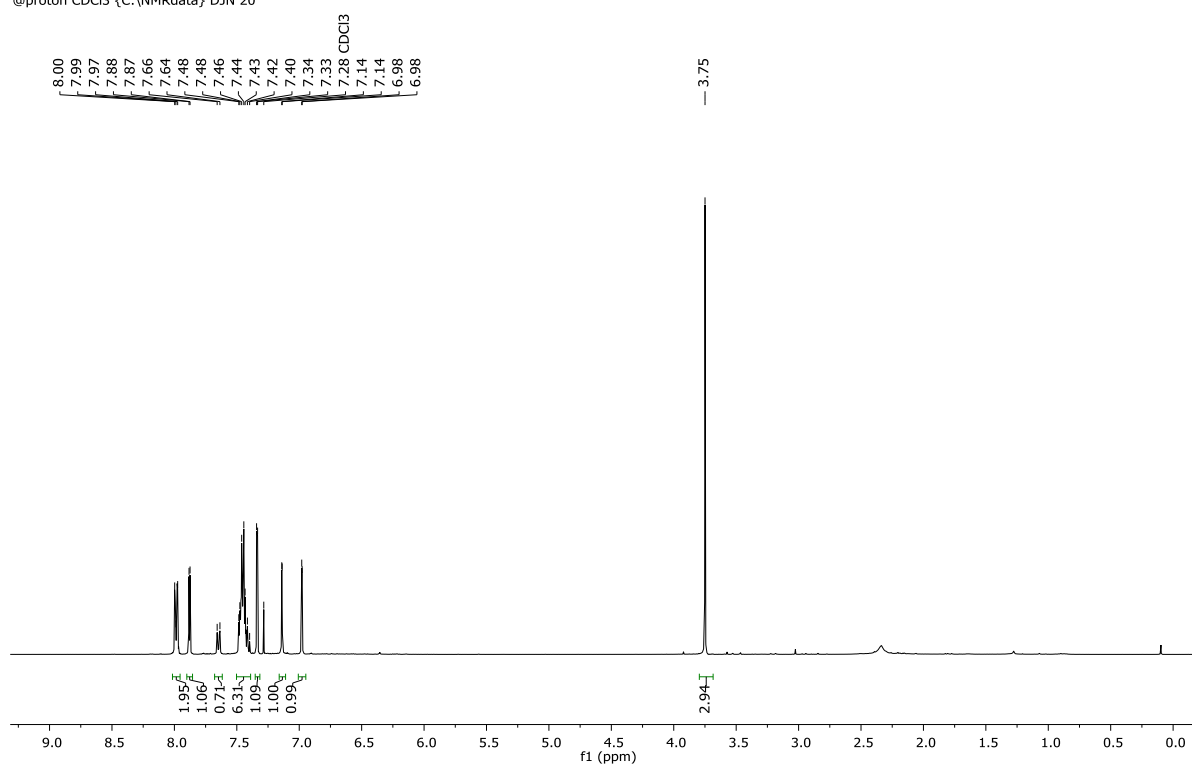

**Figure S140.** <sup>1</sup>H NMR (400 MHz, CDCl<sub>3</sub>) of the competition experiment between 1-methyl-2-phenylimidazole and 2-phenylthiazole (entry 3, Table S32).

**Table S33** Determination of the competition rate constant  $\kappa$  from the labelling experiment between 1-methyl-2-phenylimidazole and 2-phenylpyridine.

|      | Substrate <b>R1</b> | Substrate <b>R2</b> | Catalyst                         |
|------|---------------------|---------------------|----------------------------------|
|      |                     |                     | <b>Ir-2</b><br>[(COD)Ir(IMes)Cl] |
| Mass | 15.8 mg             | 15.5 mg             | 3.2 mg                           |

Note: Volume of DCM was increased to 4 mL to obtain higher conversion of both substrates.  
Deuteration expected at  $\delta$  (**R1**) = 7.67 – 7.61 ppm and at  $\delta$  (**R2**) = 8.02 – 7.96 ppm  
Determined against integral at  $\delta$  (**R1**) = 7.12 ppm and at  $\delta$  (**R2**) = 7.77 – 7.69 ppm  
*Spectral details of the deuterated reaction mixture:*  
<sup>1</sup>H NMR (400 MHz, CDCl<sub>3</sub>)  $\delta$  = 8.73 – 8.66 (m, 1H, **R2**), 8.02 – 7.96 (m, 2H/D **R2**), 7.77 – 7.69 (m, 2H **R2**), 7.67 – 7.61 (m, 2H/D, **R1**), 7.50 – 7.36 (m, 3H, **R1** and 3H, **R2**), 7.24 – 7.18 (m, 1H, **R2**), 7.12 (d,  $J$ =1.2 Hz, 1H, **R1**), 6.95 (d,  $J$ =1.2 Hz, 1H, **R1**), 3.73 (s, 3H, **R1**).

| Entry    | $I_{R1(t)}$<br>N = 2H | $I_{R1(0)}$<br>N = 1H | %D <sub>R1</sub> | $I_{R2(t)}$<br>N = 2H | $I_{R2(0)}$<br>N = 2H | %D <sub>R2</sub> | $\kappa$ |
|----------|-----------------------|-----------------------|------------------|-----------------------|-----------------------|------------------|----------|
| <b>1</b> | 1.58                  | 1.00                  | 21               | 2.09                  | 2.32                  | 10               | 2.26     |
| <b>2</b> | 1.60                  | 1.00                  | 20               | 2.02                  | 2.28                  | 11               | 1.84     |
| <b>3</b> | 1.36                  | 0.87                  | 22               | 1.76                  | 2.00                  | 12               | 1.93     |

**Average  $\kappa$  = 2.01**

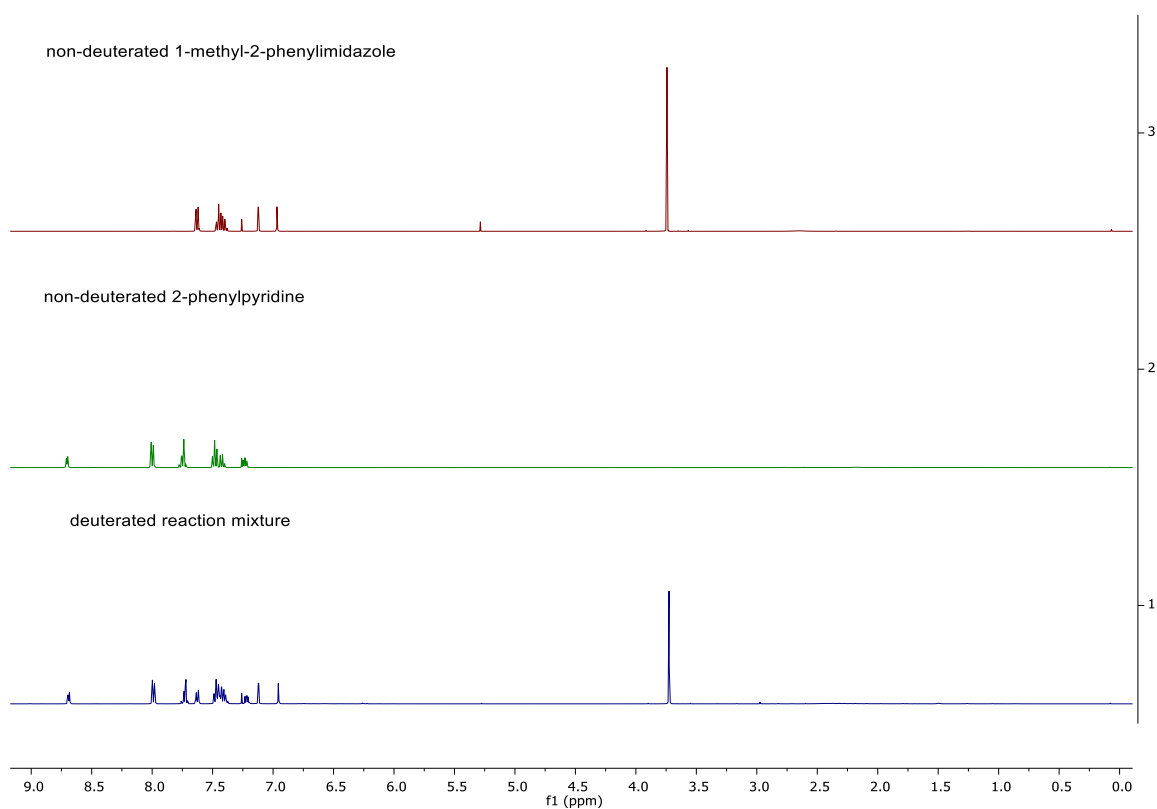

**Figure S141.** Stacked <sup>1</sup>H NMR (400 MHz, CDCl<sub>3</sub>) of non-deuterated substrates and reaction mixture.

D327153  
 Person kpb19112  
 DT-61-4  
 @proton CDCl3 {C:\NMRdata} DJN 45

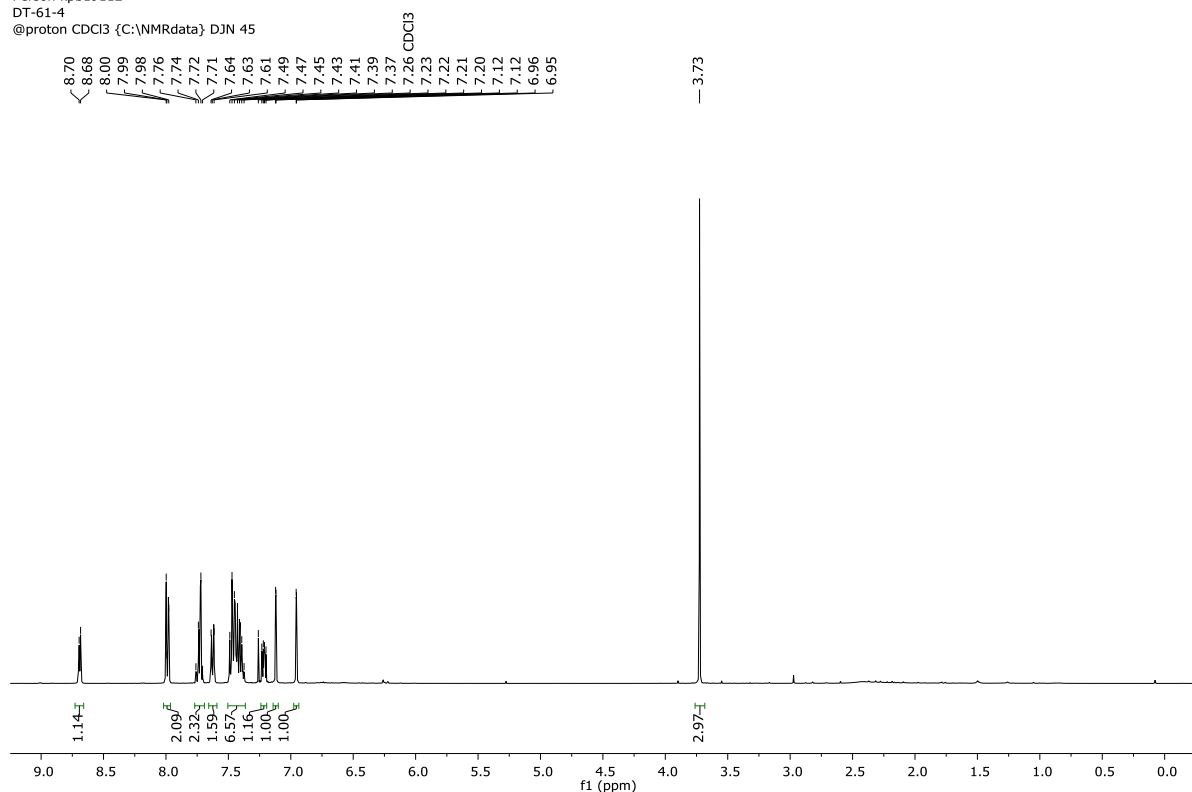

**Figure S142.**  $^1\text{H}$  NMR (400 MHz,  $\text{CDCl}_3$ ) of the competition experiment between 1-methyl-2-phenylimidazole and 2-phenylpyridine (entry 1, Table S33).

D330925  
 Person kpb19112  
 DT-98-1  
 @proton CDCl3 {C:\NMRdata} DJN 29

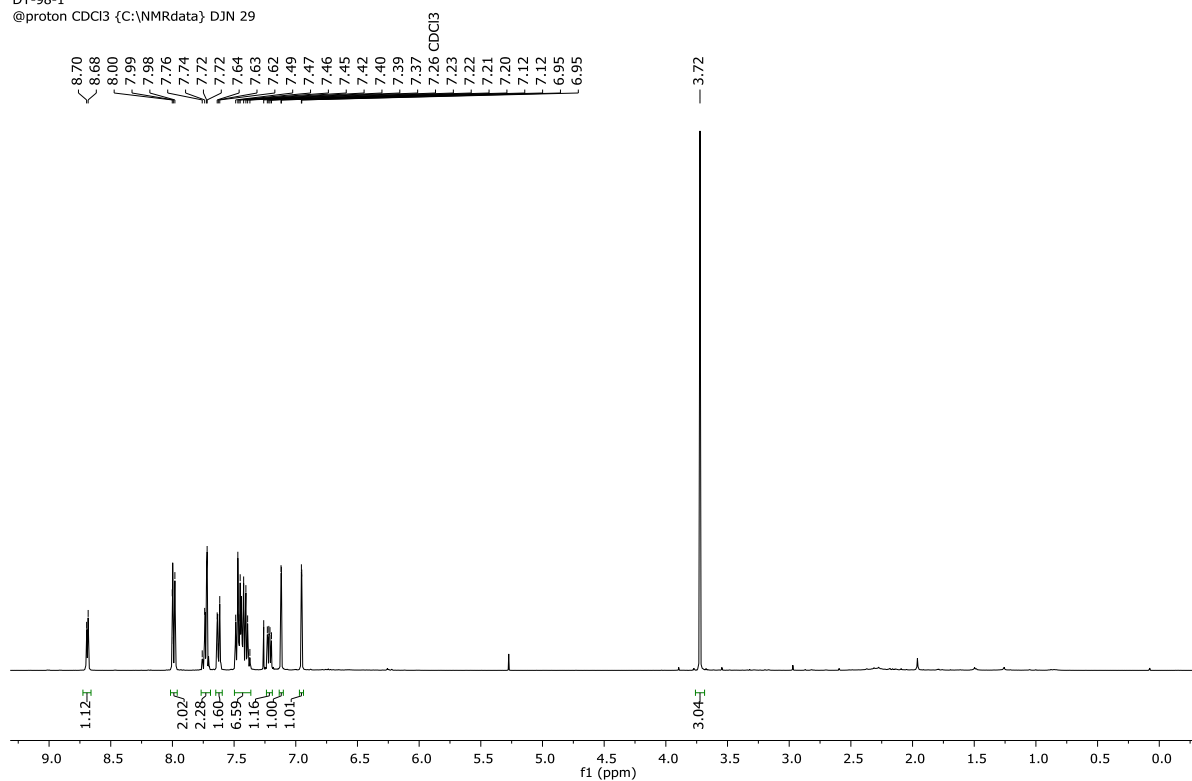

**Figure S143.**  $^1\text{H}$  NMR (400 MHz,  $\text{CDCl}_3$ ) of the competition experiment between 1-methyl-2-phenylimidazole and 2-phenylpyridine (entry 2, Table S33).

D330934  
Person kpb19112  
DT-98-2  
@proton CDCl3 {C:\NMRdata} DJN 38

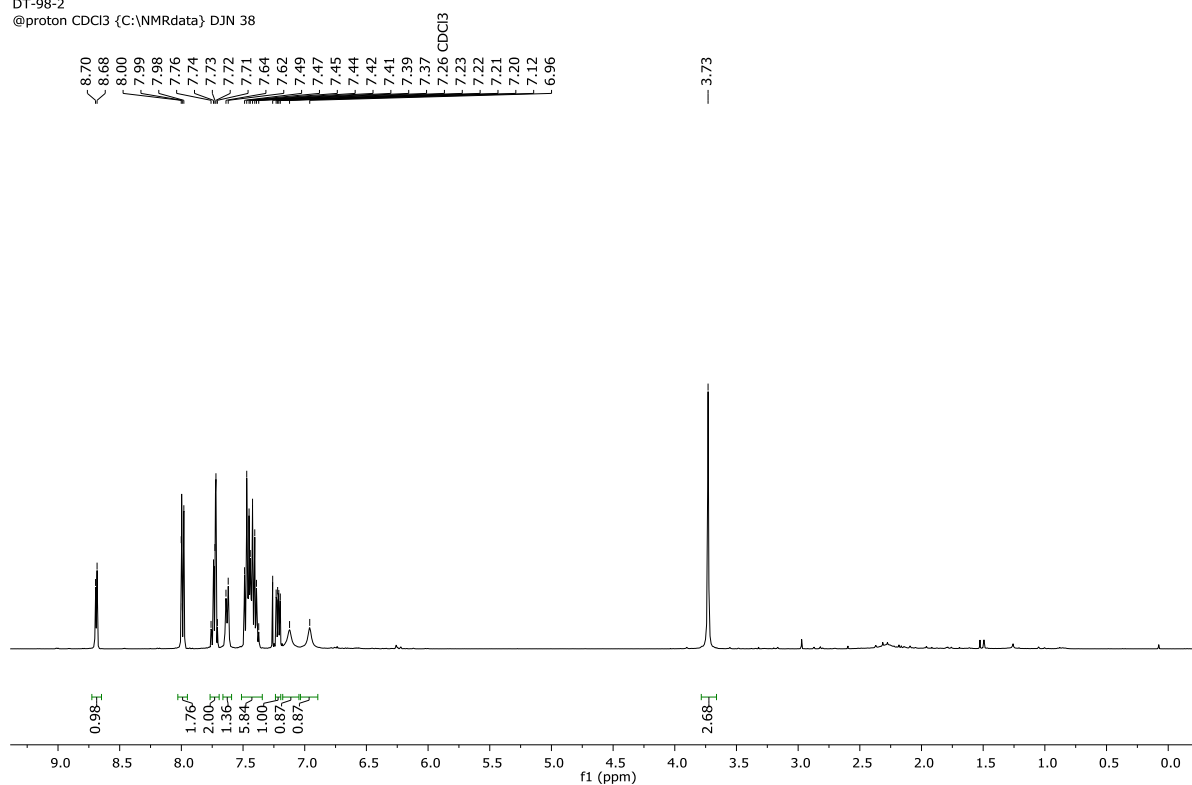

**Figure S144.** <sup>1</sup>H NMR (400 MHz, CDCl<sub>3</sub>) of the competition experiment between 1-methyl-2-phenylimidazole and 2-phenylpyridine (entry 3, Table S33).

**Table S34.** Determination of the competition rate constant  $\kappa$  from the labelling experiment between 1-methyl-2-phenylimidazole and 2-phenyloxazoline.

|                                                                                                                                                                                                                                                                                                                                                                             | Substrate <b>R1</b>                                                               | Substrate <b>R2</b>                                                               | Catalyst                         |                              |                              |                  |          |
|-----------------------------------------------------------------------------------------------------------------------------------------------------------------------------------------------------------------------------------------------------------------------------------------------------------------------------------------------------------------------------|-----------------------------------------------------------------------------------|-----------------------------------------------------------------------------------|----------------------------------|------------------------------|------------------------------|------------------|----------|
|                                                                                                                                                                                                                                                                                                                                                                             | 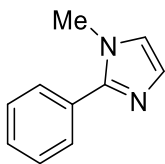 |  | <b>Ir-2</b><br>[(COD)Ir(IMes)Cl] |                              |                              |                  |          |
| Mass                                                                                                                                                                                                                                                                                                                                                                        | 15.8 mg                                                                           | 14.7 mg                                                                           | 3.2 mg                           |                              |                              |                  |          |
| Deuteration expected at $\delta$ ( <b>R1</b> ) = 7.67 – 7.61 ppm and at $\delta$ ( <b>R2</b> ) = 7.98 – 7.90 ppm                                                                                                                                                                                                                                                            |                                                                                   |                                                                                   |                                  |                              |                              |                  |          |
| Determined against integral at $\delta$ ( <b>R1</b> ) = 7.12 ppm and at $\delta$ ( <b>R2</b> ) = 4.44 ppm                                                                                                                                                                                                                                                                   |                                                                                   |                                                                                   |                                  |                              |                              |                  |          |
| <i>Spectral details of the deuterated reaction mixture:</i>                                                                                                                                                                                                                                                                                                                 |                                                                                   |                                                                                   |                                  |                              |                              |                  |          |
| <sup>1</sup> H NMR (400 MHz, CDCl <sub>3</sub> ) $\delta$ = 7.98 – 7.90 (m, 2H/D <b>R2</b> ), 7.67 – 7.61 (m, 2H/D, <b>R1</b> ), 7.50 – 7.36 (m, 3H, <b>R1</b> and 3H, <b>R2</b> ), 7.12 (d, $J$ =1.2 Hz, 1H, <b>R1</b> ), 6.96 (d, $J$ =1.2 Hz, 1H, <b>R1</b> ), 4.43 (t, $J$ = 9.5 Hz, 2H, <b>R2</b> ), 4.06 (t, $J$ = 9.5 Hz, 2H, <b>R2</b> ), 3.74 (s, 3H, <b>R1</b> ). |                                                                                   |                                                                                   |                                  |                              |                              |                  |          |
| Entry                                                                                                                                                                                                                                                                                                                                                                       | I <sub>R1(t)</sub><br>N = 2H                                                      | I <sub>R1(0)</sub><br>N = 1H                                                      | %D <sub>R1</sub>                 | I <sub>R2(t)</sub><br>N = 2H | I <sub>R2(0)</sub><br>N = 2H | %D <sub>R2</sub> | $\kappa$ |
| <b>1</b>                                                                                                                                                                                                                                                                                                                                                                    | 1.03                                                                              | 0.73                                                                              | 29                               | 1.92                         | 2.00                         | 4                | 8.55     |
| <b>2</b>                                                                                                                                                                                                                                                                                                                                                                    | 1.31                                                                              | 0.93                                                                              | 30                               | 1.91                         | 2.00                         | 5                | 7.61     |
| <b>3</b>                                                                                                                                                                                                                                                                                                                                                                    | 1.76                                                                              | 1.05                                                                              | 16                               | 1.96                         | 2.00                         | 2                | 8.74     |
| Average $\kappa$ = 8.30                                                                                                                                                                                                                                                                                                                                                     |                                                                                   |                                                                                   |                                  |                              |                              |                  |          |

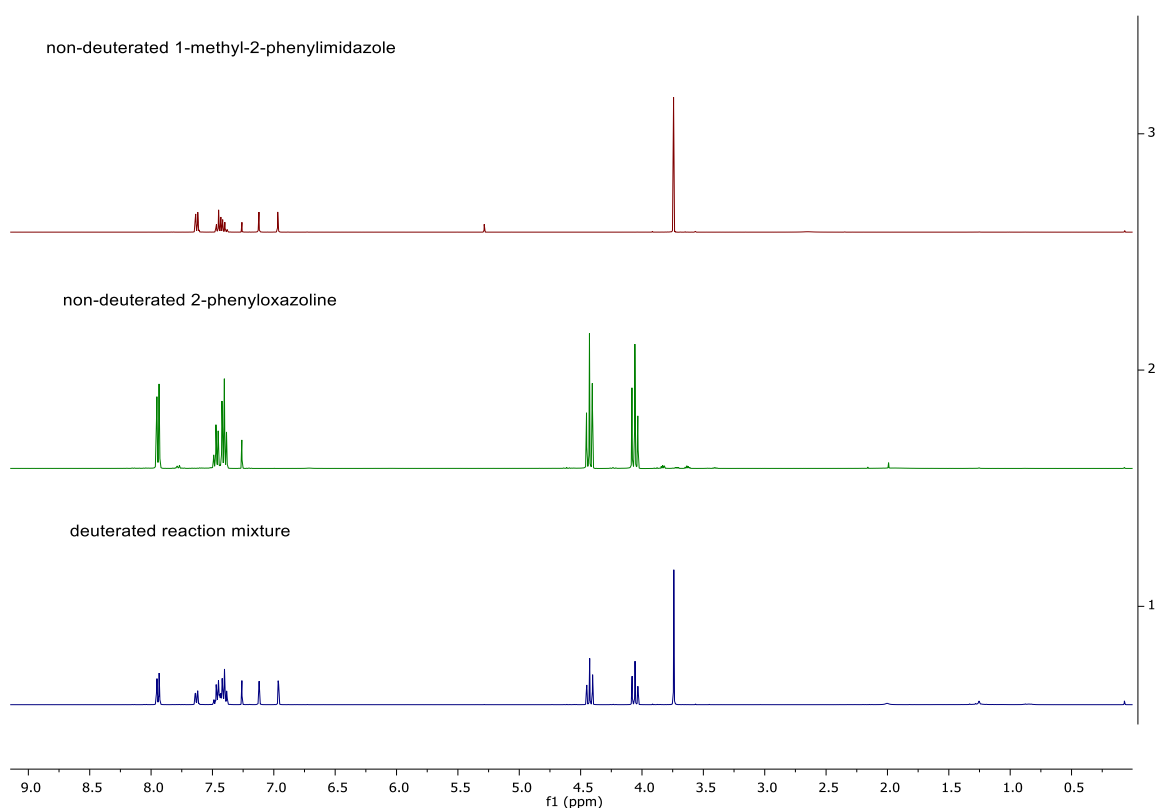

**Figure S145.** Stacked <sup>1</sup>H NMR (400 MHz, CDCl<sub>3</sub>) of non-deuterated substrates and reaction mixture.

D324233  
 Person kpb19112  
 DT-65-1  
 @proton CDCl3 {C:\NMRdata} DJN 17

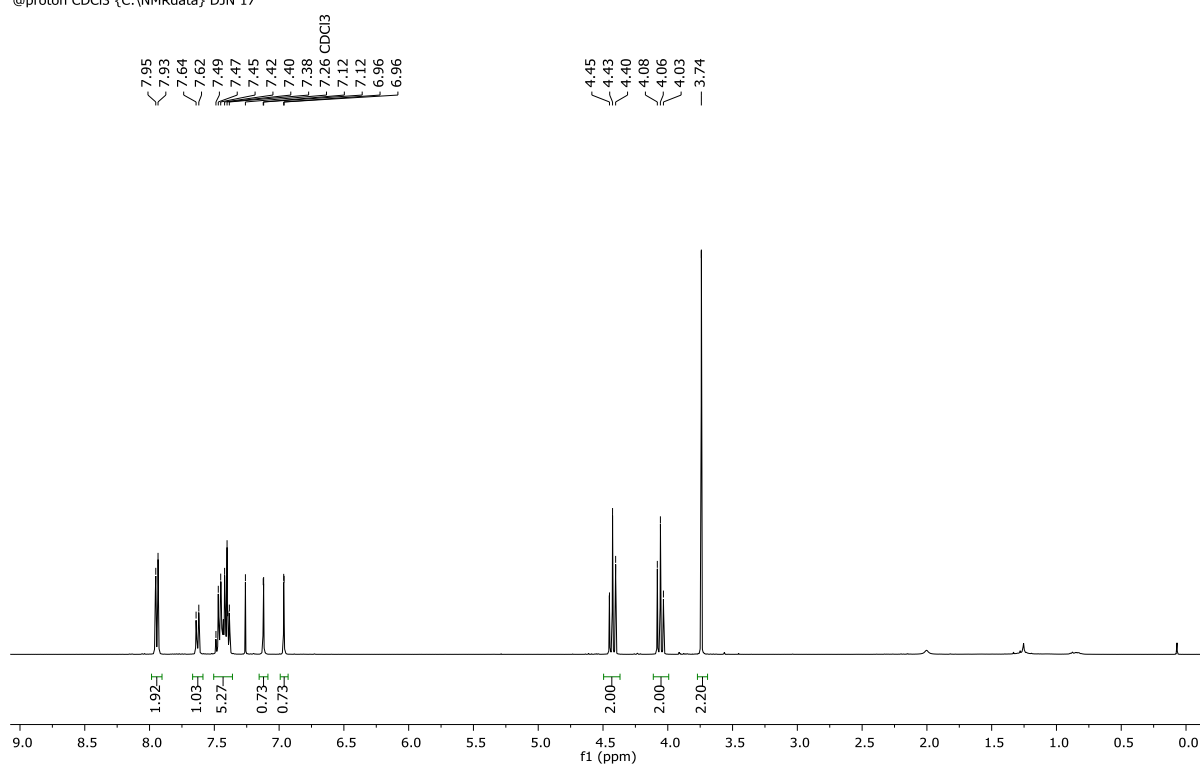

**Figure S146.**  $^1\text{H}$  NMR (400 MHz,  $\text{CDCl}_3$ ) of the competition experiment between 1-methyl-2-phenylimidazole and 2-phenyloxazoline (entry 1, Table S34).

D324234  
 Person kpb19112  
 DT-65-2  
 @proton CDCl3 {C:\NMRdata} DJN 18

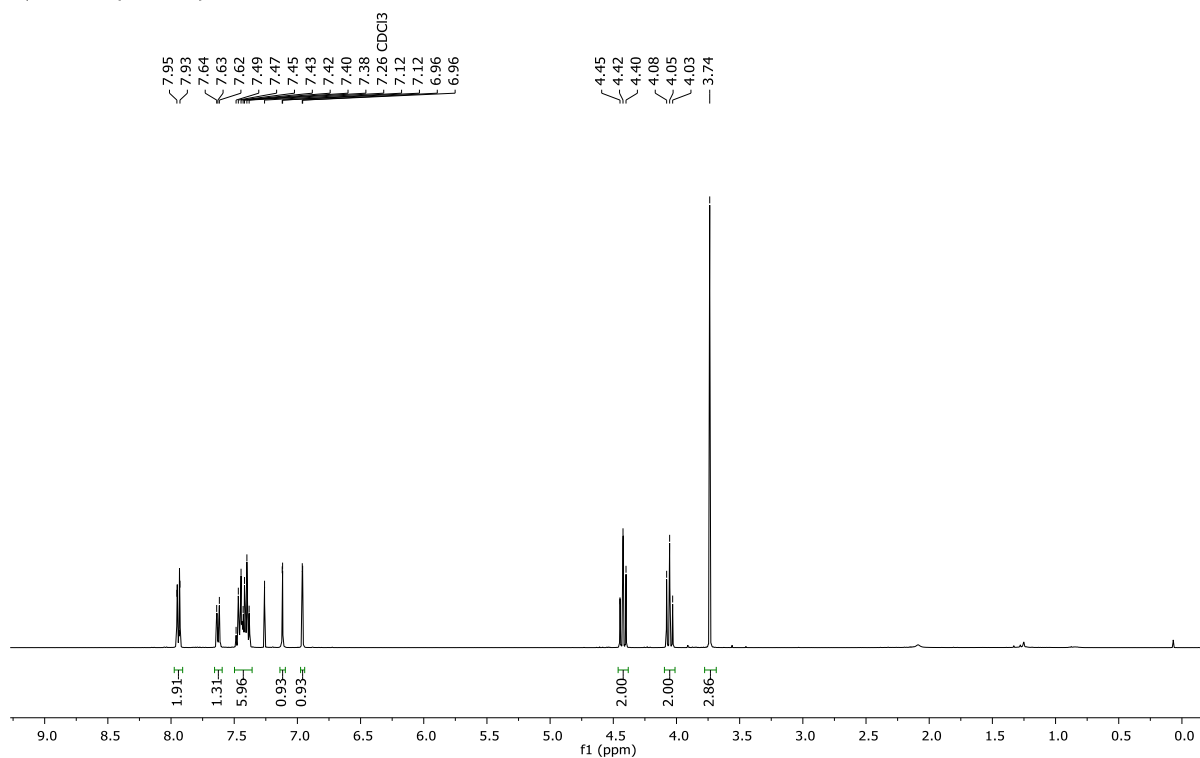

**Figure S147.**  $^1\text{H}$  NMR (400 MHz,  $\text{CDCl}_3$ ) of the competition experiment between 1-methyl-2-phenylimidazole and 2-phenyloxazoline (entry 2, Table S34).



D324231  
 Person kpb19112  
 DT-65-3(1)  
 @proton CDCl3 {C:\NMRdata} DJN 15

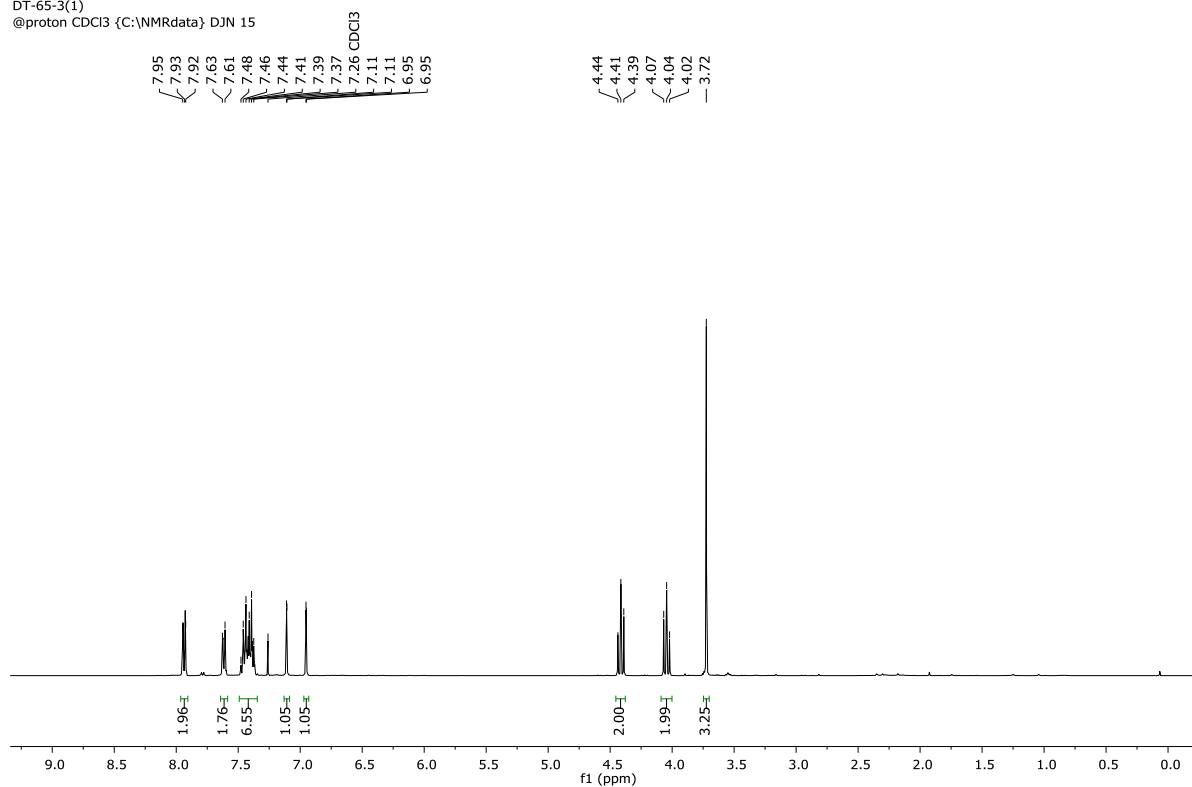

**Figure S148.** <sup>1</sup>H NMR (400 MHz, CDCl<sub>3</sub>) of the competition experiment between 1-methyl-2-phenylimidazole and 2-phenyloxazoline (entry 3, Table S34).

**Table S35.** Determination of the competition rate constant  $\kappa$  from the labelling experiment between 1-methyl-2-phenylimidazole and 2-phenylthiazoline.

|                                                                                                                                                                                                                                                                                                                                                                            | Substrate <b>R1</b>                                                               | Substrate <b>R2</b>                                                               | Catalyst                         |                              |                              |                  |          |
|----------------------------------------------------------------------------------------------------------------------------------------------------------------------------------------------------------------------------------------------------------------------------------------------------------------------------------------------------------------------------|-----------------------------------------------------------------------------------|-----------------------------------------------------------------------------------|----------------------------------|------------------------------|------------------------------|------------------|----------|
|                                                                                                                                                                                                                                                                                                                                                                            | 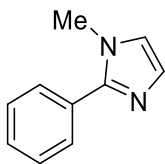 |  | <b>Ir-2</b><br>[(COD)Ir(IMes)Cl] |                              |                              |                  |          |
| Mass                                                                                                                                                                                                                                                                                                                                                                       | 15.8 mg                                                                           | 16.3 mg                                                                           | 3.2 mg                           |                              |                              |                  |          |
| Deuteration expected at $\delta$ ( <b>R1</b> ) = 7.65 – 7.60 ppm and at $\delta$ ( <b>R2</b> ) = 7.85 – 7.83 ppm                                                                                                                                                                                                                                                           |                                                                                   |                                                                                   |                                  |                              |                              |                  |          |
| Determined against integral at $\delta$ ( <b>R1</b> ) = 7.12 ppm and at $\delta$ ( <b>R2</b> ) = 4.45 ppm                                                                                                                                                                                                                                                                  |                                                                                   |                                                                                   |                                  |                              |                              |                  |          |
| <i>Spectral details of the deuterated reaction mixture:</i>                                                                                                                                                                                                                                                                                                                |                                                                                   |                                                                                   |                                  |                              |                              |                  |          |
| <sup>1</sup> H NMR (400 MHz, CDCl <sub>3</sub> ) $\delta$ = 7.85 – 7.83 (m, 2H/D <b>R2</b> ), 7.65 – 7.60 (m, 2H/D, <b>R1</b> ), 7.48 – 7.36 (m, 3H, <b>R1</b> and 3H, <b>R2</b> ), 7.12 (d, $J$ =1.2 Hz, 1H, <b>R1</b> ), 6.95 (d, $J$ =1.2 Hz, 1H, <b>R1</b> ), 4.45 (t, $J$ = 8.3 Hz, 2H, <b>R2</b> ), 3.73 (s, 3H, <b>R1</b> ), 3.40 (t, $J$ = 8.3 Hz, 2H, <b>R2</b> ) |                                                                                   |                                                                                   |                                  |                              |                              |                  |          |
| Entry                                                                                                                                                                                                                                                                                                                                                                      | I <sub>R1(t)</sub><br>N = 2H                                                      | I <sub>R1(0)</sub><br>N = 1H                                                      | %D <sub>R1</sub>                 | I <sub>R2(t)</sub><br>N = 2H | I <sub>R2(0)</sub><br>N = 2H | %D <sub>R2</sub> | $\kappa$ |
| <b>1</b>                                                                                                                                                                                                                                                                                                                                                                   | 0.87                                                                              | 1.00                                                                              | 57                               | 1.72                         | 2.32                         | 26               | 2.78     |
| <b>2</b>                                                                                                                                                                                                                                                                                                                                                                   | 0.90                                                                              | 1.00                                                                              | 55                               | 1.51                         | 2.34                         | 35               | 1.82     |
| <b>3</b>                                                                                                                                                                                                                                                                                                                                                                   | 0.99                                                                              | 1.00                                                                              | 51                               | 1.66                         | 2.26                         | 27               | 2.28     |
| Average $\kappa$ = 2.29                                                                                                                                                                                                                                                                                                                                                    |                                                                                   |                                                                                   |                                  |                              |                              |                  |          |

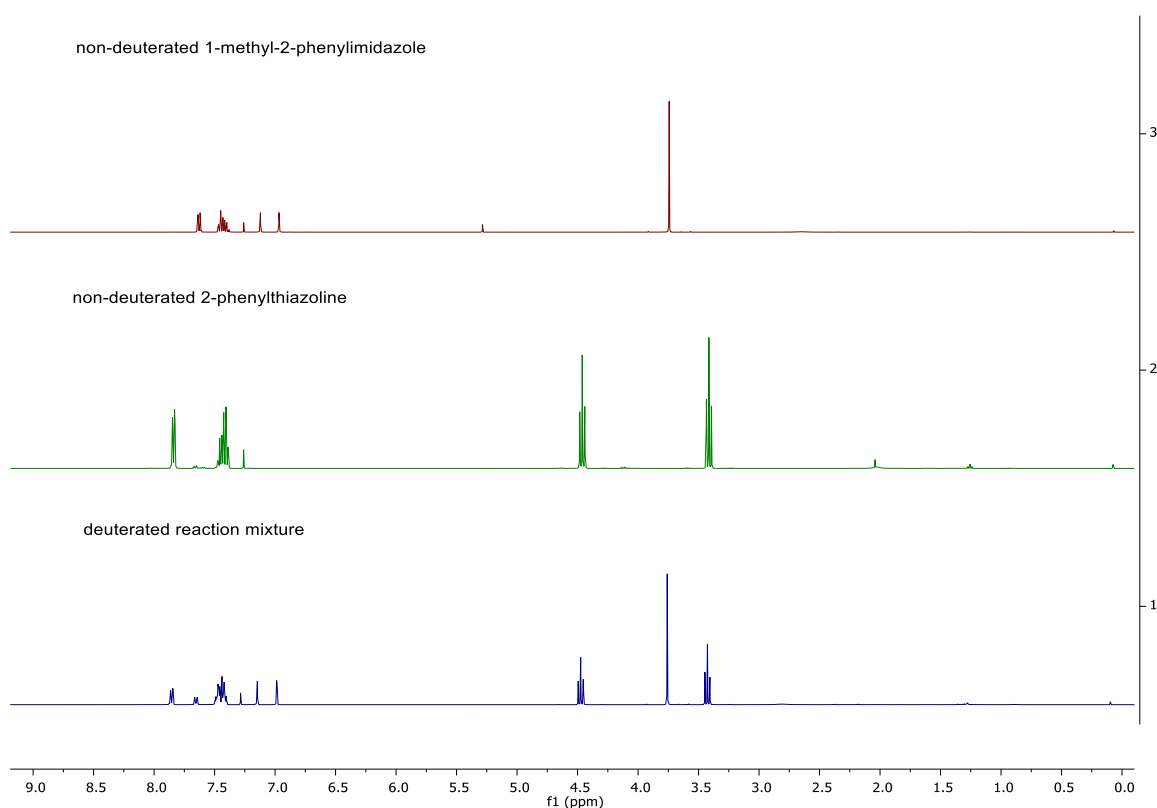

**Figure S149.** Stacked <sup>1</sup>H NMR (400 MHz, CDCl<sub>3</sub>) of non-deuterated substrates and reaction mixture.

D327414  
 Person kpb19112  
 DT-79-1  
 @proton CDCl3 {C:\NMRdata} DJN 31

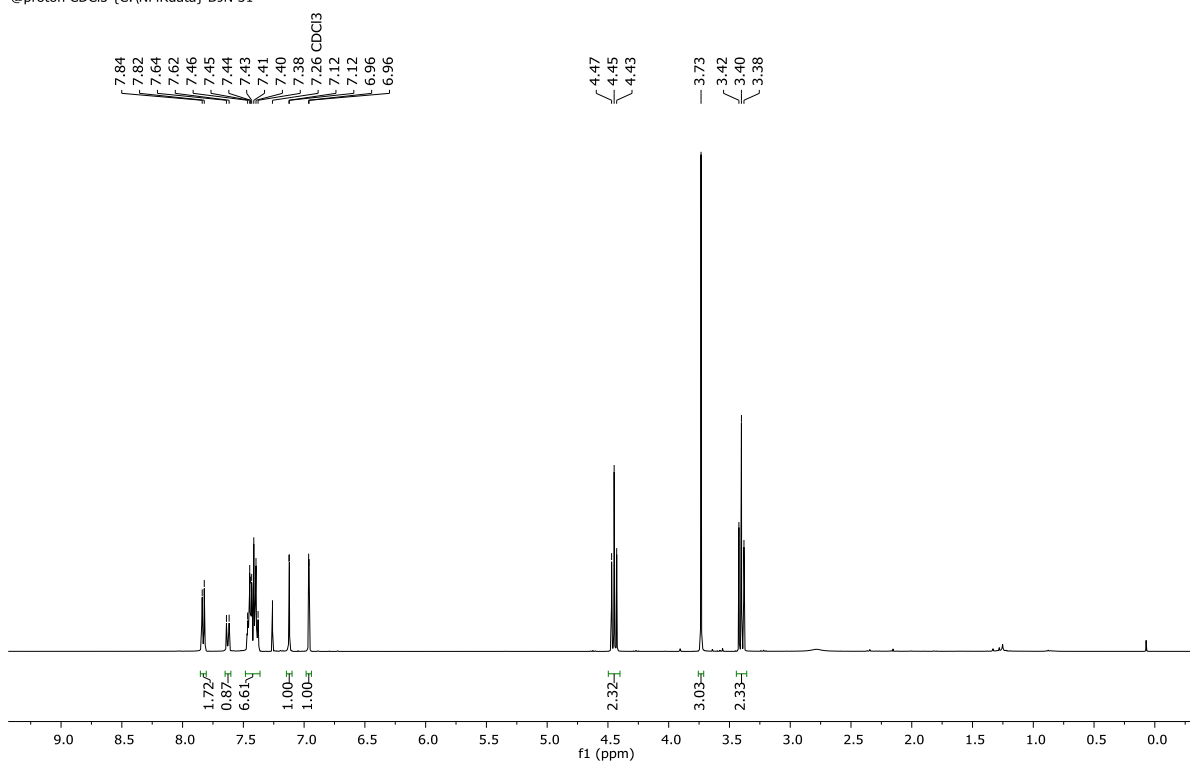

**Figure S150.**  $^1\text{H}$  NMR (400 MHz,  $\text{CDCl}_3$ ) of the competition experiment between 1-methyl-2-phenylimidazole and 2-phenylthiazoline (entry 1, Table S35).

D328045  
 Person kpb19112  
 DT-79-2  
 @proton CDCl3 {C:\NMRdata} DJN 75

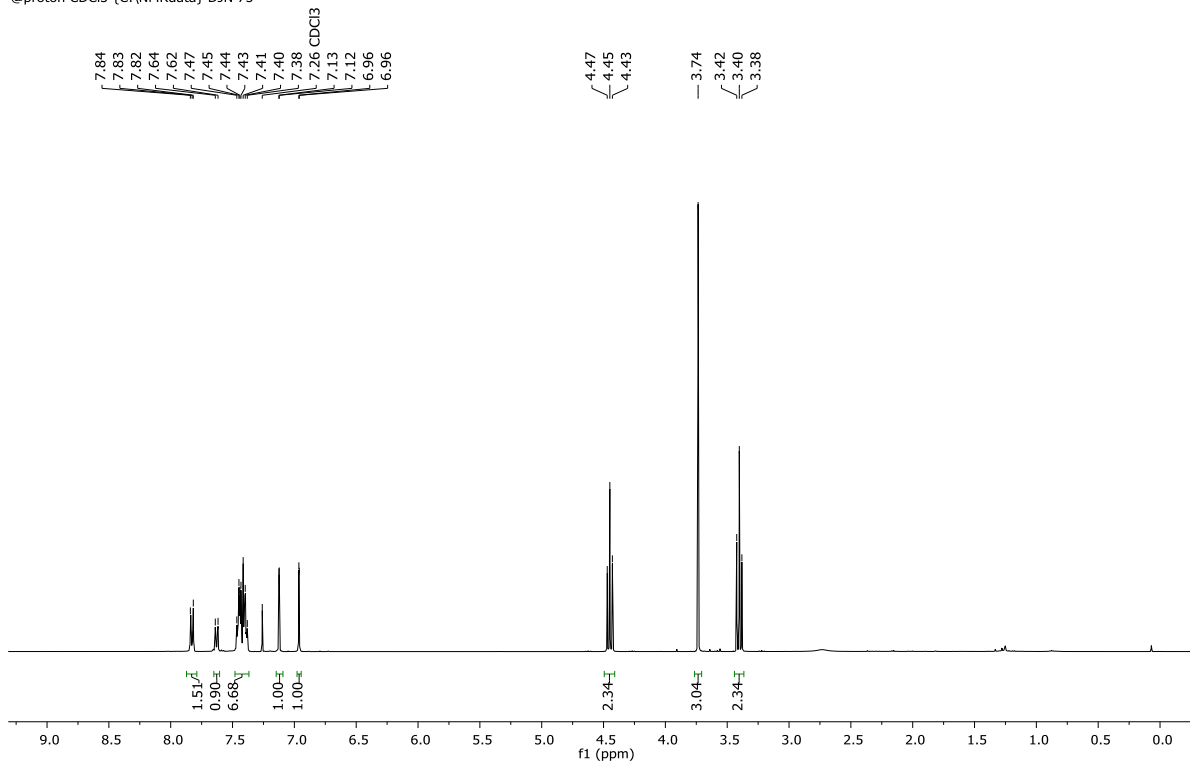

**Figure S151.**  $^1\text{H}$  NMR (400 MHz,  $\text{CDCl}_3$ ) of the competition experiment between 1-methyl-2-phenylimidazole and 2-phenylthiazoline (entry 2, Table S35).

D328046  
 Person kpb19112  
 DT-79-3  
 @proton CDCl3 {C:\NMRdata\ DJN 76

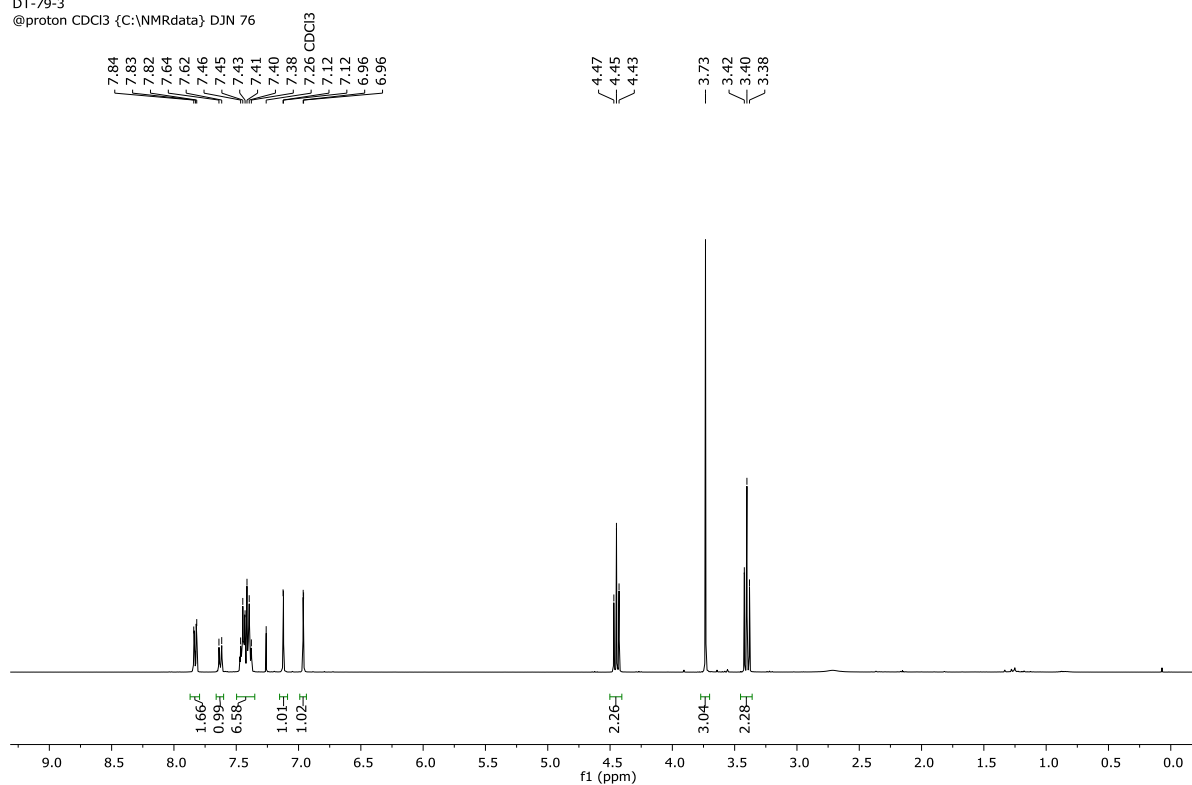

**Figure S152.** <sup>1</sup>H NMR (400 MHz, CDCl<sub>3</sub>) of the competition experiment between 1-methyl-2-phenylimidazole and 2-phenylthiazoline (entry 3, Table S35).

**Table S36.** Determination of the competition rate constant  $\kappa$  from the labelling experiment between 2-phenylthiazoline and 2-phenyloxazoline.

|                                                                                                                                                                                                                                                                                                                        | Substrate <b>R1</b>                                                               | Substrate <b>R2</b>                                                               | Catalyst                         |                              |                              |                  |          |
|------------------------------------------------------------------------------------------------------------------------------------------------------------------------------------------------------------------------------------------------------------------------------------------------------------------------|-----------------------------------------------------------------------------------|-----------------------------------------------------------------------------------|----------------------------------|------------------------------|------------------------------|------------------|----------|
|                                                                                                                                                                                                                                                                                                                        | 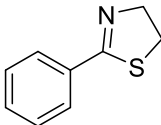 |  | <b>Ir-2</b><br>[(COD)Ir(IMes)Cl] |                              |                              |                  |          |
| Mass                                                                                                                                                                                                                                                                                                                   | 16.3 mg                                                                           | 14.7 mg                                                                           | 3.2 mg                           |                              |                              |                  |          |
| Deuteration expected at $\delta$ ( <b>R1</b> ) = 7.86 – 7.81 ppm and at $\delta$ ( <b>R2</b> ) = 7.98 – 7.93 ppm                                                                                                                                                                                                       |                                                                                   |                                                                                   |                                  |                              |                              |                  |          |
| Determined against integral at $\delta$ ( <b>R1</b> ) = 3.41 ppm and at $\delta$ ( <b>R2</b> ) = 4.06 ppm                                                                                                                                                                                                              |                                                                                   |                                                                                   |                                  |                              |                              |                  |          |
| <i>Spectral details of the deuterated reaction mixture:</i>                                                                                                                                                                                                                                                            |                                                                                   |                                                                                   |                                  |                              |                              |                  |          |
| <sup>1</sup> H NMR (400 MHz, CDCl <sub>3</sub> ) $\delta$ = 7.98 – 7.93 (m, 2H/D <b>R2</b> ), 7.86 – 7.81 (m, 2H/D, <b>R1</b> ), 7.51 – 7.36 (m, 3H, <b>R1</b> and 3H, <b>R2</b> ), 4.49 – 4.40 (m, 2H, <b>R1</b> and 2H, <b>R2</b> ), 4.06 (t, $J$ = 9.5 Hz, 2H, <b>R2</b> ), 3.41 (t, $J$ = 8.4 Hz, 2H, <b>R1</b> ). |                                                                                   |                                                                                   |                                  |                              |                              |                  |          |
| Entry                                                                                                                                                                                                                                                                                                                  | I <sub>R1(t)</sub><br>N = 2H                                                      | I <sub>R1(0)</sub><br>N = 2H                                                      | %D <sub>R1</sub>                 | I <sub>R2(t)</sub><br>N = 2H | I <sub>R2(0)</sub><br>N = 2H | %D <sub>R2</sub> | $\kappa$ |
| <b>1</b>                                                                                                                                                                                                                                                                                                               | 1.47                                                                              | 2.45                                                                              | 40                               | 1.50                         | 2.00                         | 25               | 1.78     |
| <b>2</b>                                                                                                                                                                                                                                                                                                               | 1.88                                                                              | 2.76                                                                              | 32                               | 1.62                         | 2.00                         | 19               | 1.82     |
| <b>3</b>                                                                                                                                                                                                                                                                                                               | 1.47                                                                              | 2.49                                                                              | 41                               | 1.50                         | 2.00                         | 25               | 1.83     |
| Average $\kappa$ = 1.81                                                                                                                                                                                                                                                                                                |                                                                                   |                                                                                   |                                  |                              |                              |                  |          |

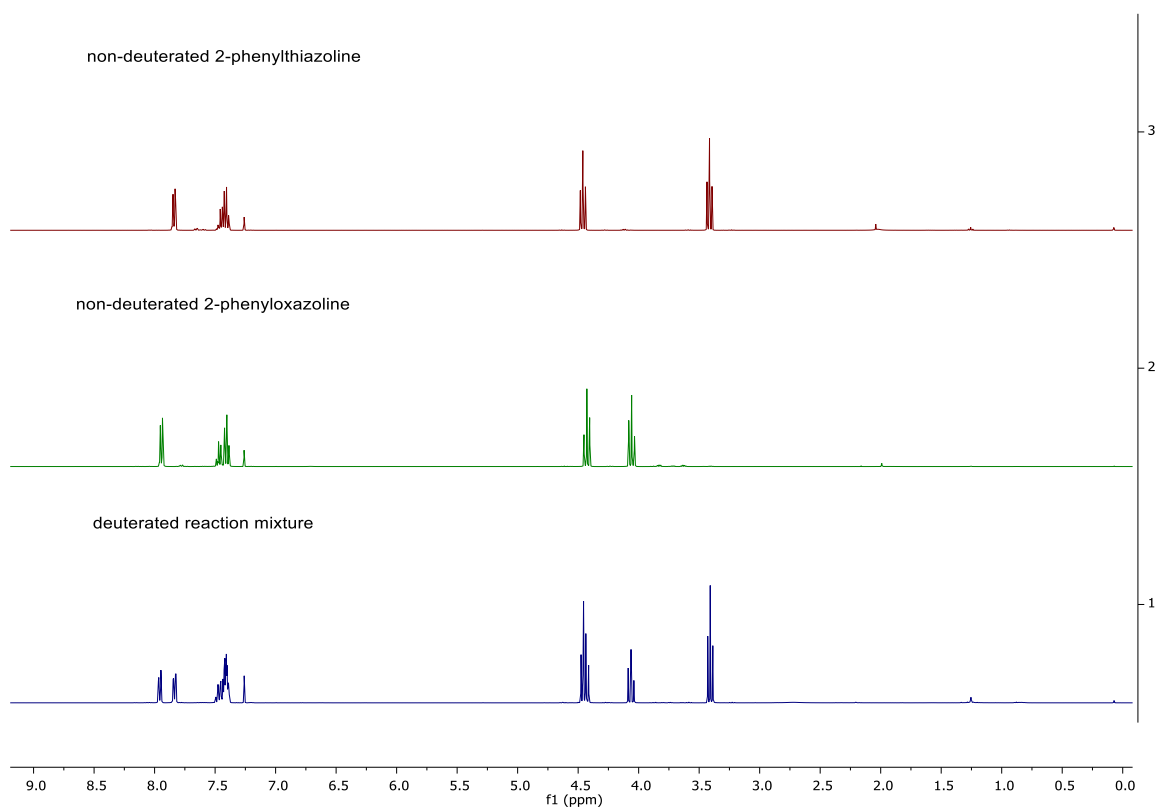

**Figure S153.** Stacked <sup>1</sup>H NMR (400 MHz, CDCl<sub>3</sub>) of non-deuterated substrates and reaction mixture.

D327415  
 Person kpb19112  
 DT-80-1  
 @proton CDCl3 {C:\NMRdata} DJN 32

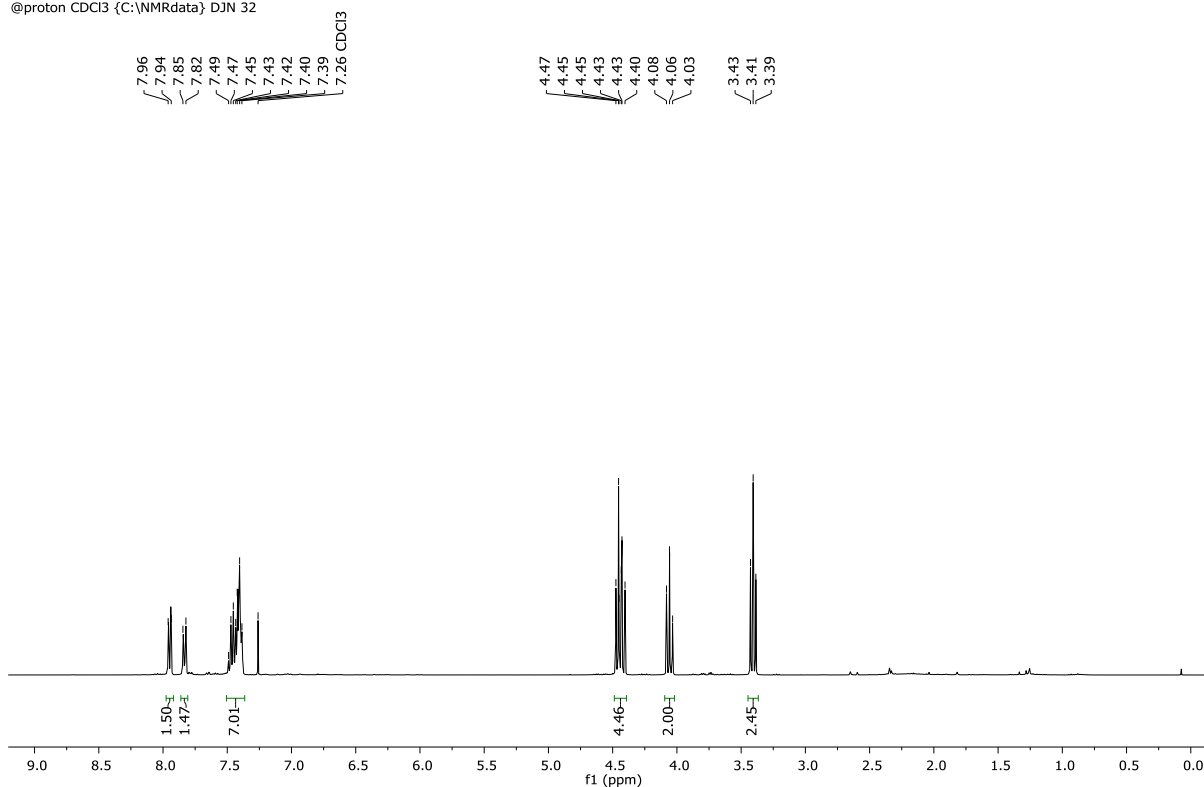

**Figure S154.** <sup>1</sup>H NMR (400 MHz, CDCl<sub>3</sub>) of the competition experiment between 2-phenylthiazoline and 2-phenyloxazoline (entry 1, Table S36).

D328047  
 Person kpb19112  
 DT-80-2  
 @proton CDCl3 {C:\NMRdata} DJN 77

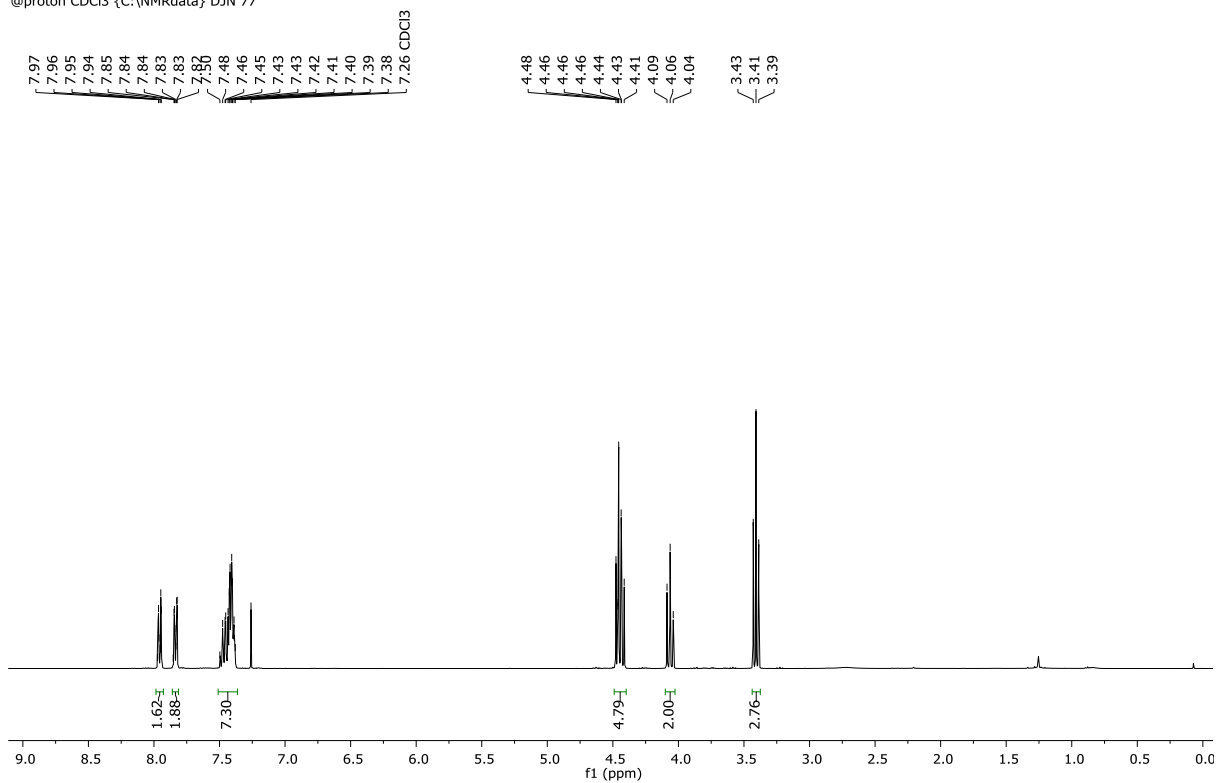

**Figure S155.** <sup>1</sup>H NMR (400 MHz, CDCl<sub>3</sub>) of the competition experiment between 2-phenylthiazoline and 2-phenyloxazoline (entry 2, Table S36).

D328048  
 Person kpb19112  
 DT-80-3  
 @proton CDCl3 {C:\NMRdata} DJN 78

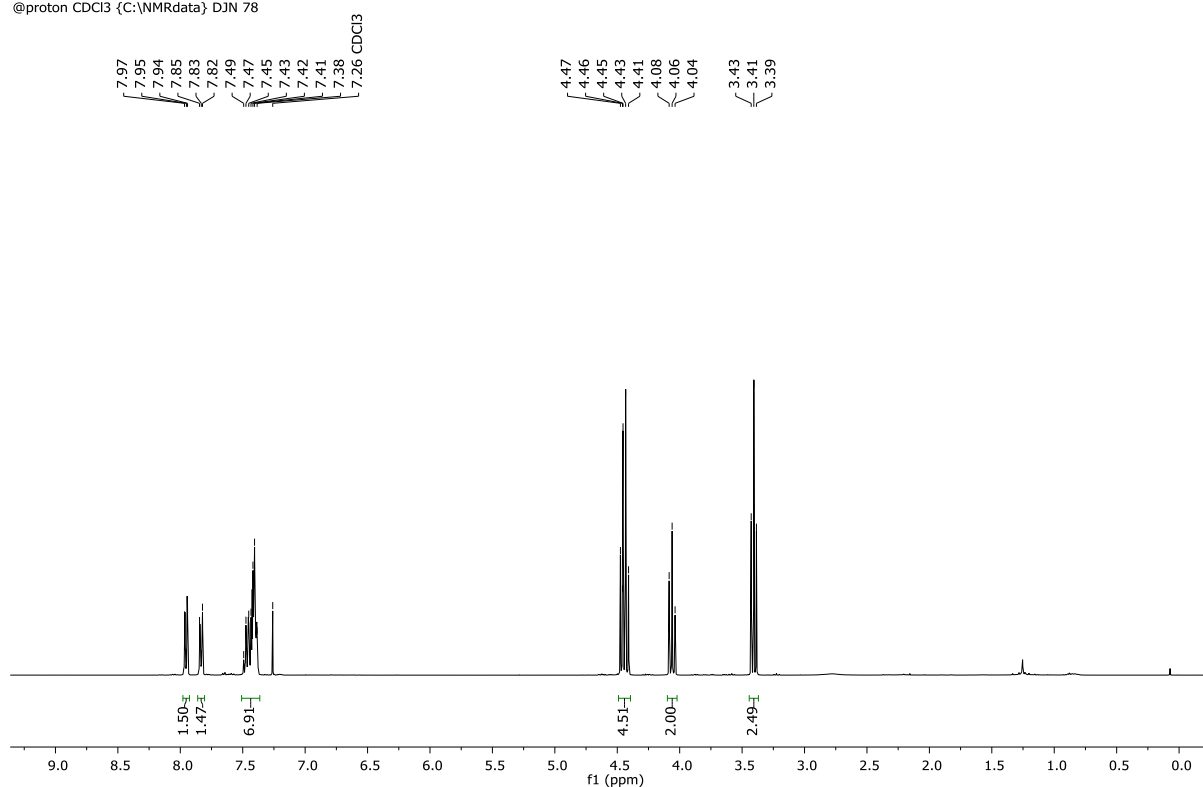

**Figure S156.** <sup>1</sup>H NMR (400 MHz, CDCl<sub>3</sub>) of the competition experiment between 2-phenylthiazoline and 2-phenyloxazoline (entry 3, Table S36).

**Table S37.** Determination of the competition rate constant  $\kappa$  from the labelling experiment between 2-phenylpyrimidine and 2-phenylpyridine.

|                                                                                                                                                                                                                                                                                                                                                                        | Substrate <b>R1</b>                                                               | Substrate <b>R2</b>                                                               | Catalyst                         |                              |                              |                  |          |
|------------------------------------------------------------------------------------------------------------------------------------------------------------------------------------------------------------------------------------------------------------------------------------------------------------------------------------------------------------------------|-----------------------------------------------------------------------------------|-----------------------------------------------------------------------------------|----------------------------------|------------------------------|------------------------------|------------------|----------|
|                                                                                                                                                                                                                                                                                                                                                                        | 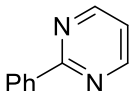 |  | <b>Ir-2</b><br>[(COD)Ir(IMes)Cl] |                              |                              |                  |          |
| Mass                                                                                                                                                                                                                                                                                                                                                                   | 15.6 mg                                                                           | 15.5 mg                                                                           | 3.2 mg                           |                              |                              |                  |          |
| Deuteration expected at $\delta$ ( <b>R1</b> ) = 8.49 – 8.42 ppm and at $\delta$ ( <b>R2</b> ) = 8.02 – 7.97 ppm                                                                                                                                                                                                                                                       |                                                                                   |                                                                                   |                                  |                              |                              |                  |          |
| Determined against integral at $\delta$ ( <b>R1</b> ) = 8.80 ppm and at $\delta$ ( <b>R2</b> ) = 7.77 – 7.70 ppm                                                                                                                                                                                                                                                       |                                                                                   |                                                                                   |                                  |                              |                              |                  |          |
| <i>Spectral details of the deuterated reaction mixture:</i>                                                                                                                                                                                                                                                                                                            |                                                                                   |                                                                                   |                                  |                              |                              |                  |          |
| <sup>1</sup> H NMR (400 MHz, CDCl <sub>3</sub> ) $\delta$ = 8.80 (d, $J$ = 4.8 Hz, 2H, <b>R1</b> ), 8.73 – 7.67 (m, 1H, <b>R2</b> ), 8.49 – 8.42 (m, 2H/D, <b>R1</b> ), 8.02 – 7.97 (m, 2H/D <b>R2</b> ), 7.77 – 7.70 (m, 2H, <b>R2</b> ), 7.52 – 7.39 (m, 3H, <b>R1</b> and 3H, <b>R2</b> ), 7.25 – 7.20 (m, 1H, <b>R2</b> ), 7.17 (t, $J$ = 4.8 Hz, 1H, <b>R1</b> ). |                                                                                   |                                                                                   |                                  |                              |                              |                  |          |
| Entry                                                                                                                                                                                                                                                                                                                                                                  | I <sub>R1(t)</sub><br>N = 2H                                                      | I <sub>R1(0)</sub><br>N = 2H                                                      | %D <sub>R1</sub>                 | I <sub>R2(t)</sub><br>N = 2H | I <sub>R2(0)</sub><br>N = 2H | %D <sub>R2</sub> | $\kappa$ |
| <b>1</b>                                                                                                                                                                                                                                                                                                                                                               | 1.70                                                                              | 2.00                                                                              | 15                               | 1.75                         | 2.01                         | 13               | 1.17     |
| <b>2</b>                                                                                                                                                                                                                                                                                                                                                               | 1.52                                                                              | 2.00                                                                              | 24                               | 1.58                         | 1.96                         | 19               | 1.27     |
| <b>3</b>                                                                                                                                                                                                                                                                                                                                                               | 1.56                                                                              | 2.00                                                                              | 22                               | 1.66                         | 2.00                         | 17               | 1.33     |
| Average $\kappa$ = 1.26                                                                                                                                                                                                                                                                                                                                                |                                                                                   |                                                                                   |                                  |                              |                              |                  |          |

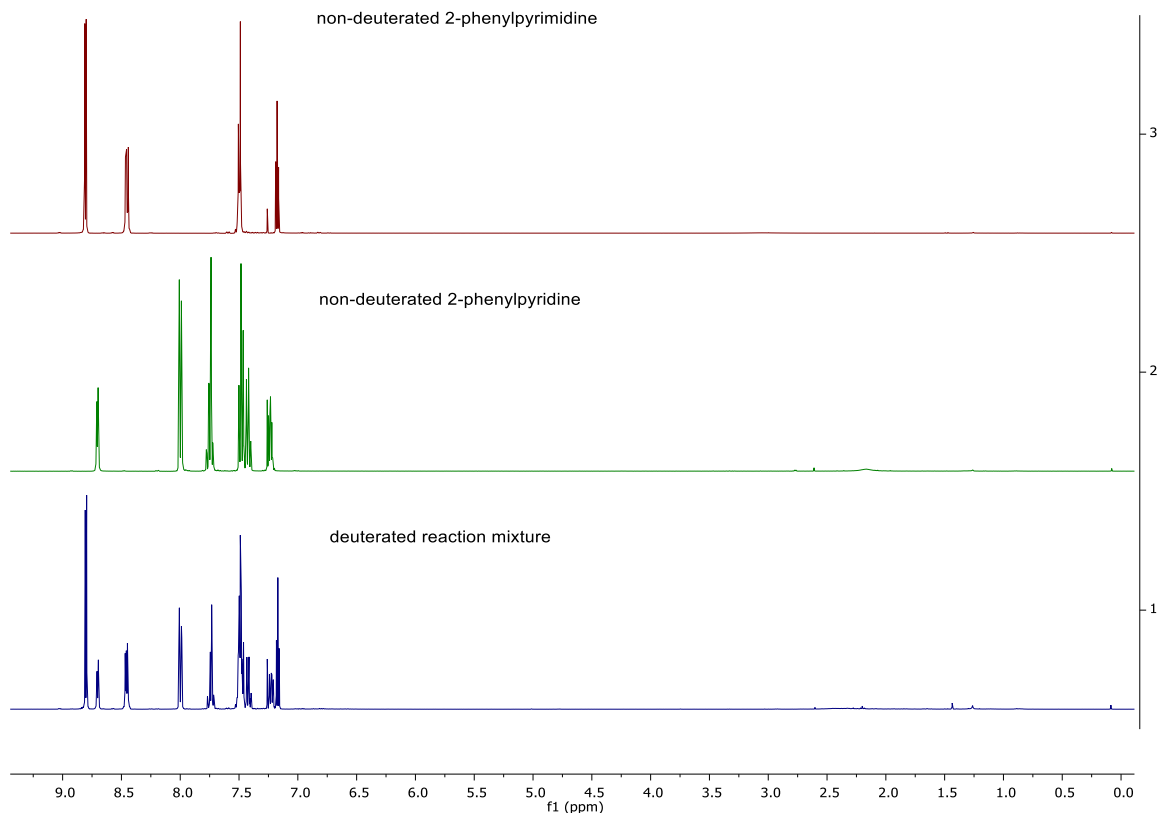

**Figure S157.** Stacked <sup>1</sup>H NMR (400 MHz, CDCl<sub>3</sub>) of non-deuterated substrates and reaction mixture.



D328079  
 Person kpb19112  
 DT-86-1  
 @proton CDCl3 {C:\NMRdata} DJN 30

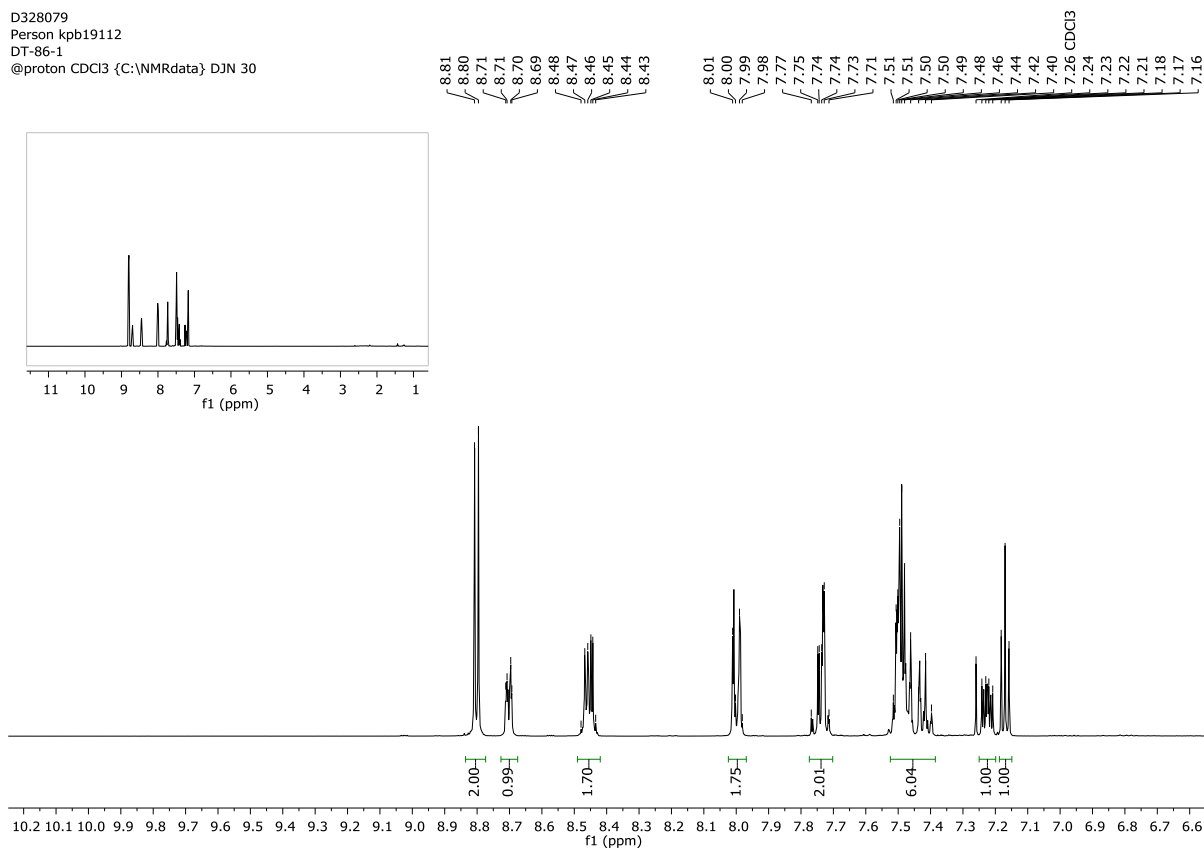

**Figure S158.**  $^1\text{H}$  NMR (400 MHz,  $\text{CDCl}_3$ ) of the competition experiment between 2-phenylpyrimidine and 2-phenylpyridine (entry 1, Table S37).

D328080  
 Person kpb19112  
 DT-86-2  
 @proton CDCl3 {C:\NMRdata} DJN 31

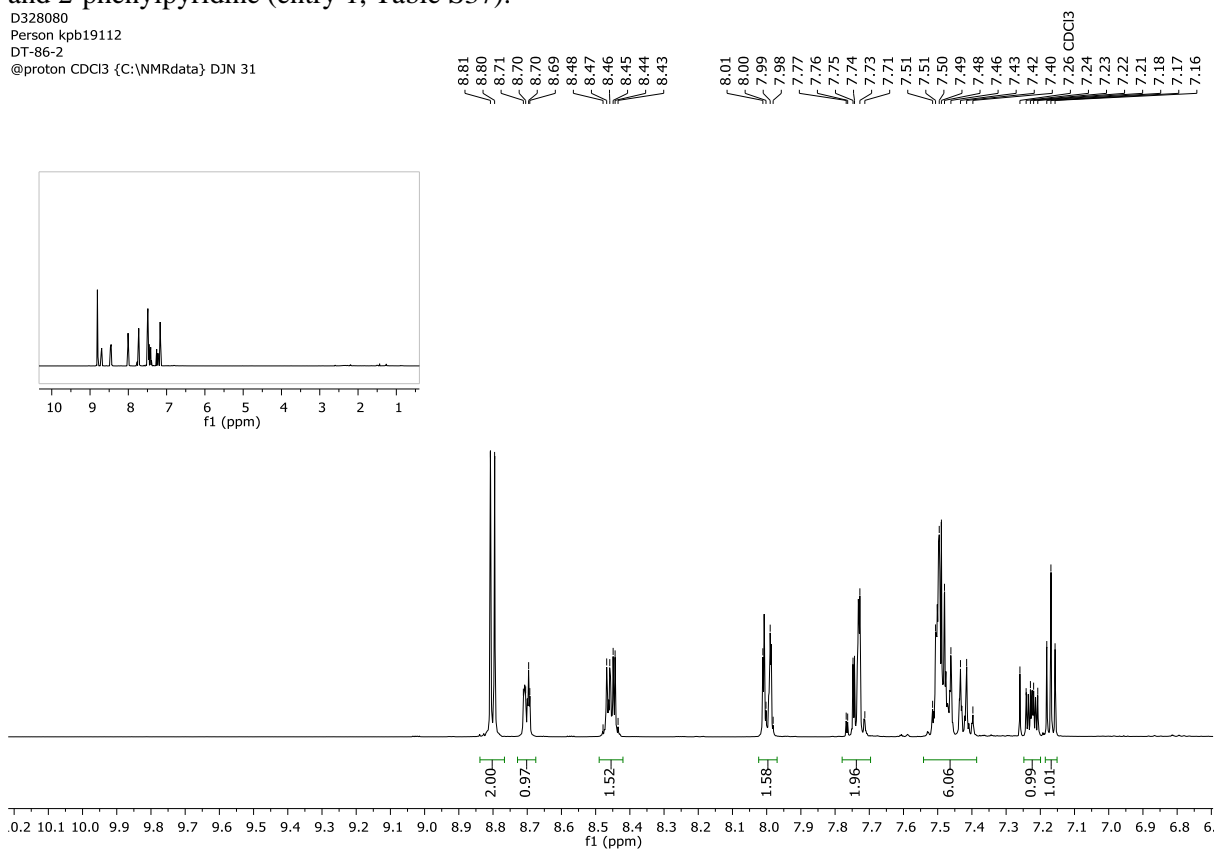

**Figure S159.**  $^1\text{H}$  NMR (400 MHz,  $\text{CDCl}_3$ ) of the competition experiment between 2-phenylpyrimidine and 2-phenylpyridine (entry 2, Table S37).

D332033  
 Person kpb19112  
 DT-86-4  
 @proton CDCl3 {C:\NMRdata} DJN 42

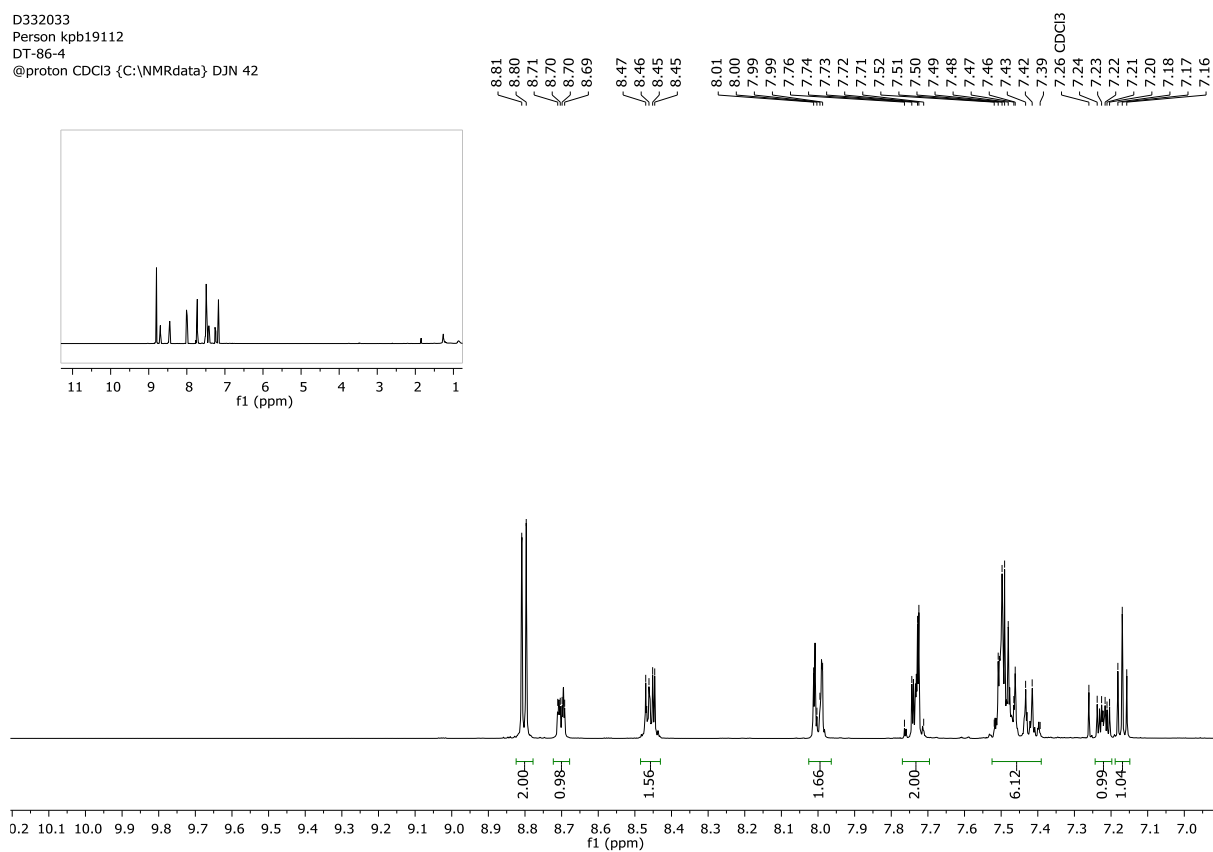

**Figure S160.**  $^1\text{H}$  NMR (400 MHz,  $\text{CDCl}_3$ ) of the competition experiment between 2-phenylpyrimidine and 2-phenylpyridine (entry 3, Table S37).

**Table S38.** Determination of the competition rate constant  $\kappa$  from the labelling experiment between 2-phenylimidazole and 1-phenylpyrazole.

|                                                                                                                                                                                                                                                                                                                                                                                                                                     | Substrate <b>R1</b>                                                               | Substrate <b>R2</b>                                                               | Catalyst                         |                              |                              |                  |          |
|-------------------------------------------------------------------------------------------------------------------------------------------------------------------------------------------------------------------------------------------------------------------------------------------------------------------------------------------------------------------------------------------------------------------------------------|-----------------------------------------------------------------------------------|-----------------------------------------------------------------------------------|----------------------------------|------------------------------|------------------------------|------------------|----------|
|                                                                                                                                                                                                                                                                                                                                                                                                                                     | 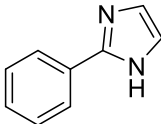 |  | <b>Ir-2</b><br>[(COD)Ir(IMes)Cl] |                              |                              |                  |          |
| Mass                                                                                                                                                                                                                                                                                                                                                                                                                                | 14.4 mg                                                                           | 14.4 mg                                                                           | 3.2 mg                           |                              |                              |                  |          |
| Deuteration expected at $\delta$ ( <b>R1</b> ) = 7.98 – 7.90 ppm and at $\delta$ ( <b>R2</b> ) = 7.87 – 7.82 ppm                                                                                                                                                                                                                                                                                                                    |                                                                                   |                                                                                   |                                  |                              |                              |                  |          |
| Determined against integral at $\delta$ ( <b>R1</b> ) = 7.52 – 7.41 ppm and at $\delta$ ( <b>R2</b> ) = 8.49 ppm                                                                                                                                                                                                                                                                                                                    |                                                                                   |                                                                                   |                                  |                              |                              |                  |          |
| <i>Spectral details of the deuterated reaction mixture:</i>                                                                                                                                                                                                                                                                                                                                                                         |                                                                                   |                                                                                   |                                  |                              |                              |                  |          |
| <sup>1</sup> H NMR (400 MHz, DMSO- <i>d</i> <sub>6</sub> ) $\delta$ = 12.51 (br, 1H, <b>R1</b> ), 8.49 (d, <i>J</i> = 2.5 Hz, 1H, <b>R2</b> ), 7.98 – 7.90 (m, 2H/D, <b>R1</b> ), 7.87 – 7.82 (m, 2H/D, <b>R2</b> ), 7.74 (d, <i>J</i> = 1.5 Hz, 1H, <b>R1</b> ), 7.52 – 7.41 (m, 2H, <b>R1</b> and 2H, <b>R2</b> ), 7.36 – 7.29 (m, 1H, <b>R1</b> and 1H, <b>R2</b> ), 7.14 (br, 2H, <b>R1</b> ), 6.55 – 6.52 (m, 1H, <b>R2</b> ). |                                                                                   |                                                                                   |                                  |                              |                              |                  |          |
| Entry                                                                                                                                                                                                                                                                                                                                                                                                                               | I <sub>R1(t)</sub><br>N = 2H                                                      | I <sub>R1(0)</sub><br>N = 2H                                                      | %D <sub>R1</sub>                 | I <sub>R2(t)</sub><br>N = 2H | I <sub>R2(0)</sub><br>N = 1H | %D <sub>R2</sub> | $\kappa$ |
| <b>1</b>                                                                                                                                                                                                                                                                                                                                                                                                                            | 1.08                                                                              | 2.23                                                                              | 52                               | 1.87                         | 1.00                         | 6                | 10.79    |
| <b>2</b>                                                                                                                                                                                                                                                                                                                                                                                                                            | 1.04                                                                              | 2.11                                                                              | 51                               | 1.87                         | 1.00                         | 6                | 10.53    |
| <b>3</b>                                                                                                                                                                                                                                                                                                                                                                                                                            | 1.06                                                                              | 2.15                                                                              | 51                               | 1.88                         | 1.00                         | 6                | 11.43    |
| <b>Average <math>\kappa</math> = 10.91</b>                                                                                                                                                                                                                                                                                                                                                                                          |                                                                                   |                                                                                   |                                  |                              |                              |                  |          |
| <sup>a</sup> I <sub>R1(t)</sub> = 4.23–1.00×2; <sup>b</sup> I <sub>R1(t)</sub> = 4.11–1.00×2; <sup>c</sup> I <sub>R1(t)</sub> = 4.15–1.00×2;                                                                                                                                                                                                                                                                                        |                                                                                   |                                                                                   |                                  |                              |                              |                  |          |

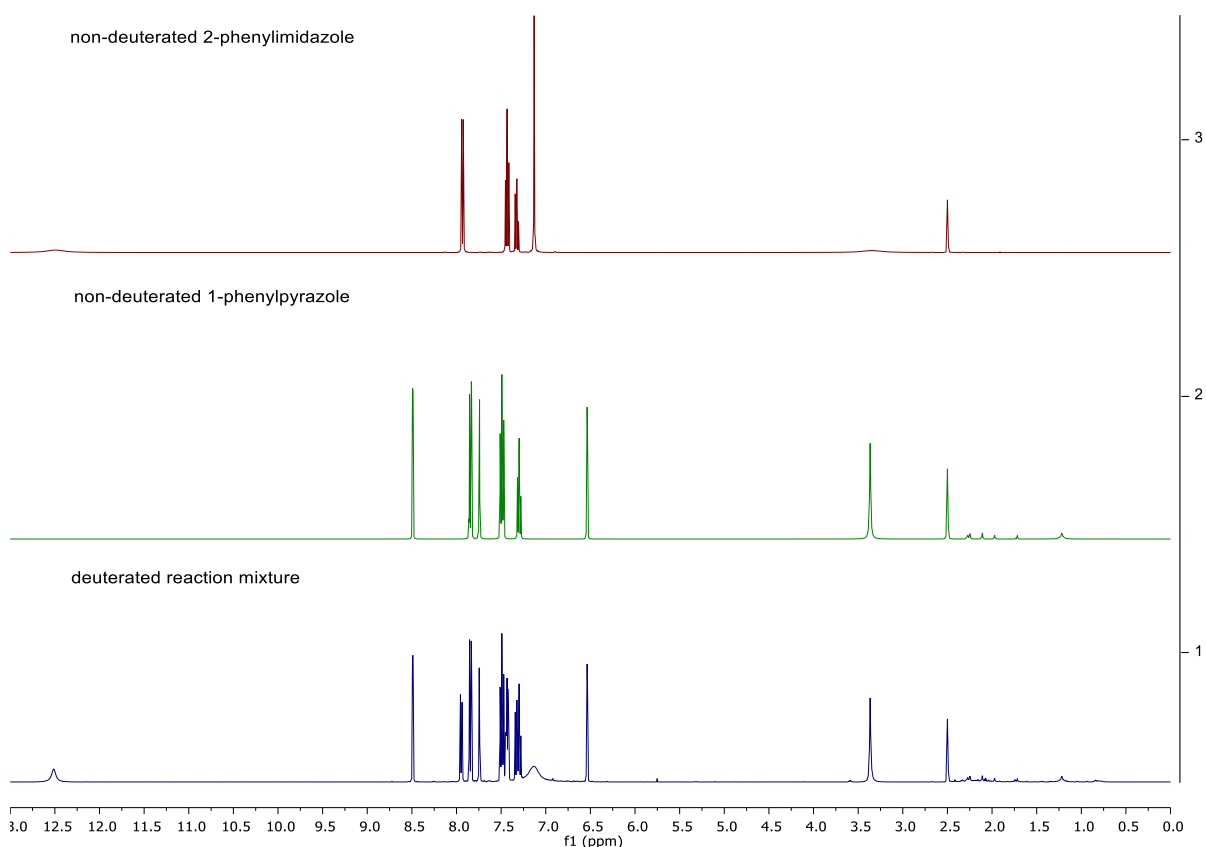

**Figure S161.** Stacked <sup>1</sup>H NMR (400 MHz, DMSO-*d*<sub>6</sub>) of non-deuterated substrates and reaction mixture.

D332367  
 Person kpb19112  
 DT-47  
 @proton DMSO {C:\NMRdata} DJN 26

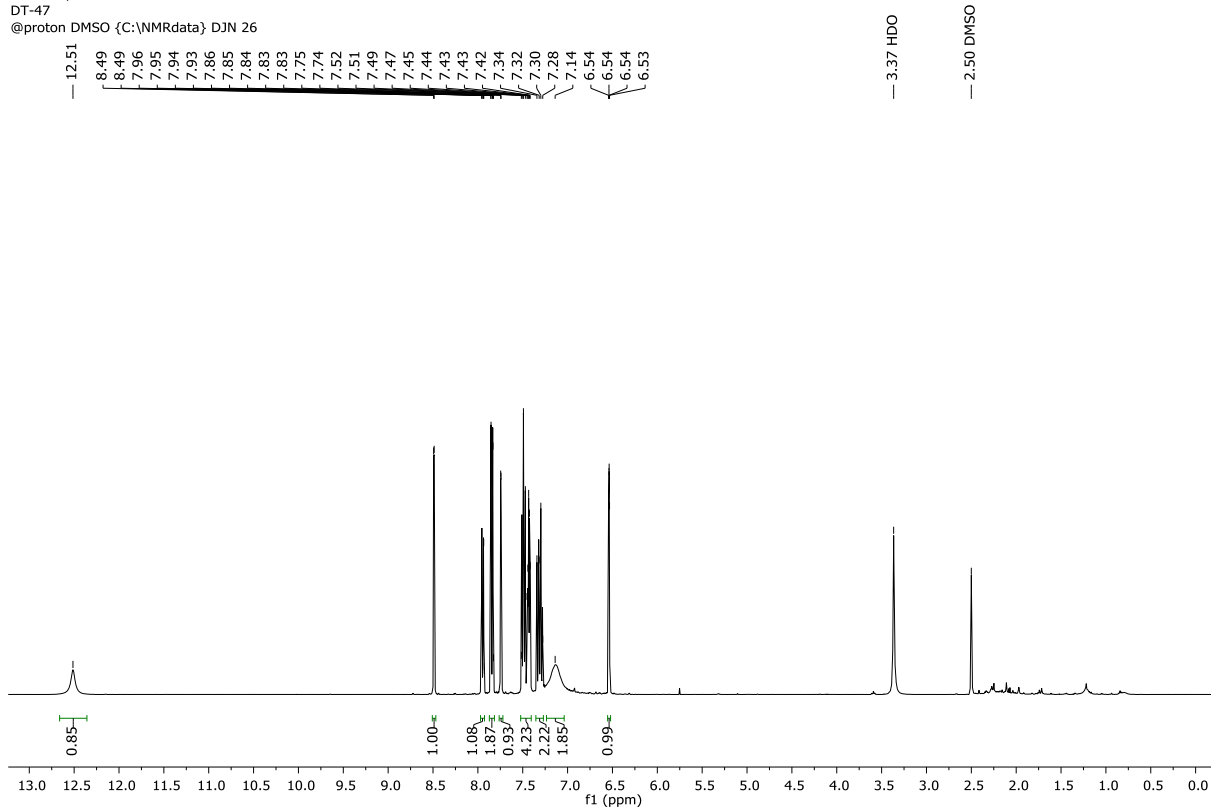

**Figure S162.**  $^1\text{H}$  NMR (400 MHz,  $\text{DMSO}-d_6$ ) of the competition experiment between 2-phenylimidazole and 1-phenylpyrazole (entry 1, Table S38).

D332513  
 Person kpb19112  
 DT-47-2  
 @proton DMSO {C:\NMRdata} DJN 10

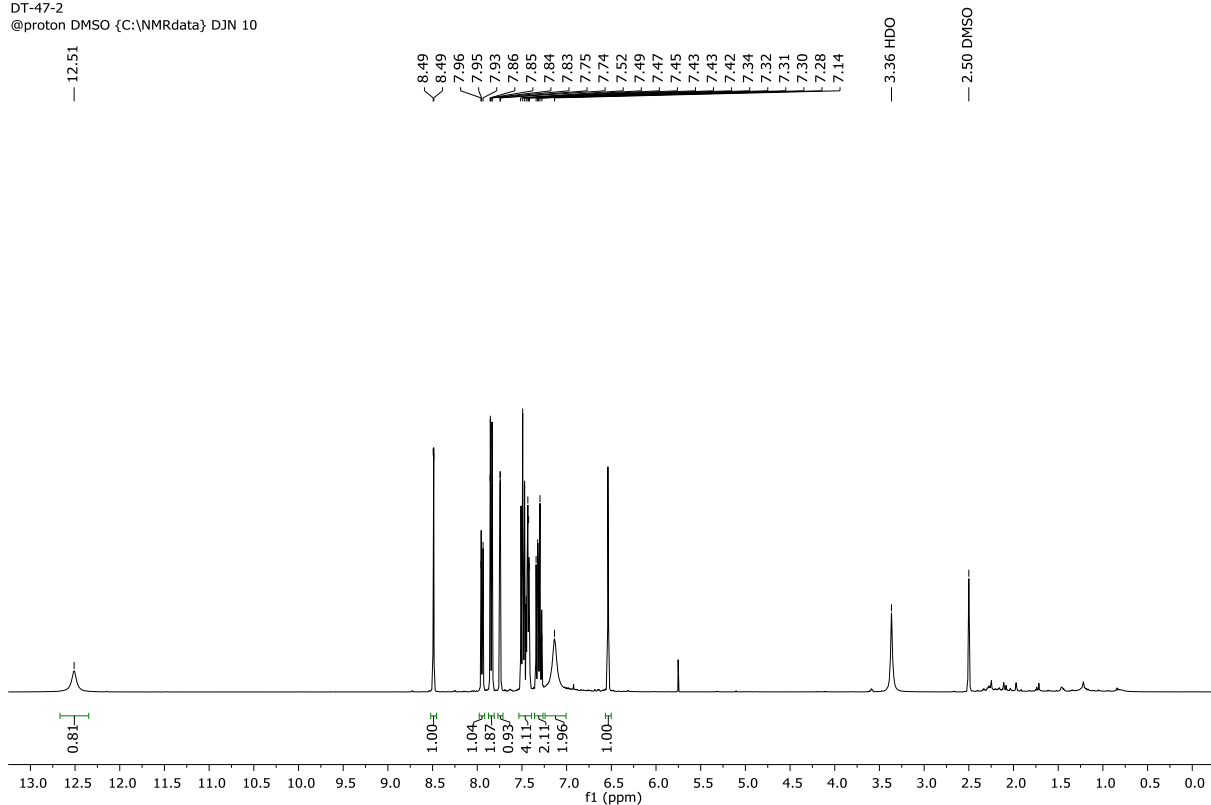

**Figure S163.**  $^1\text{H}$  NMR (400 MHz,  $\text{DMSO}-d_6$ ) of the competition experiment between 2-phenylimidazole and 1-phenylpyrazole (entry 2, Table S38).

D332977  
 Person kpb19112  
 DT-47-3A  
 @proton DMSO {C:\NMRdata} DJN 23

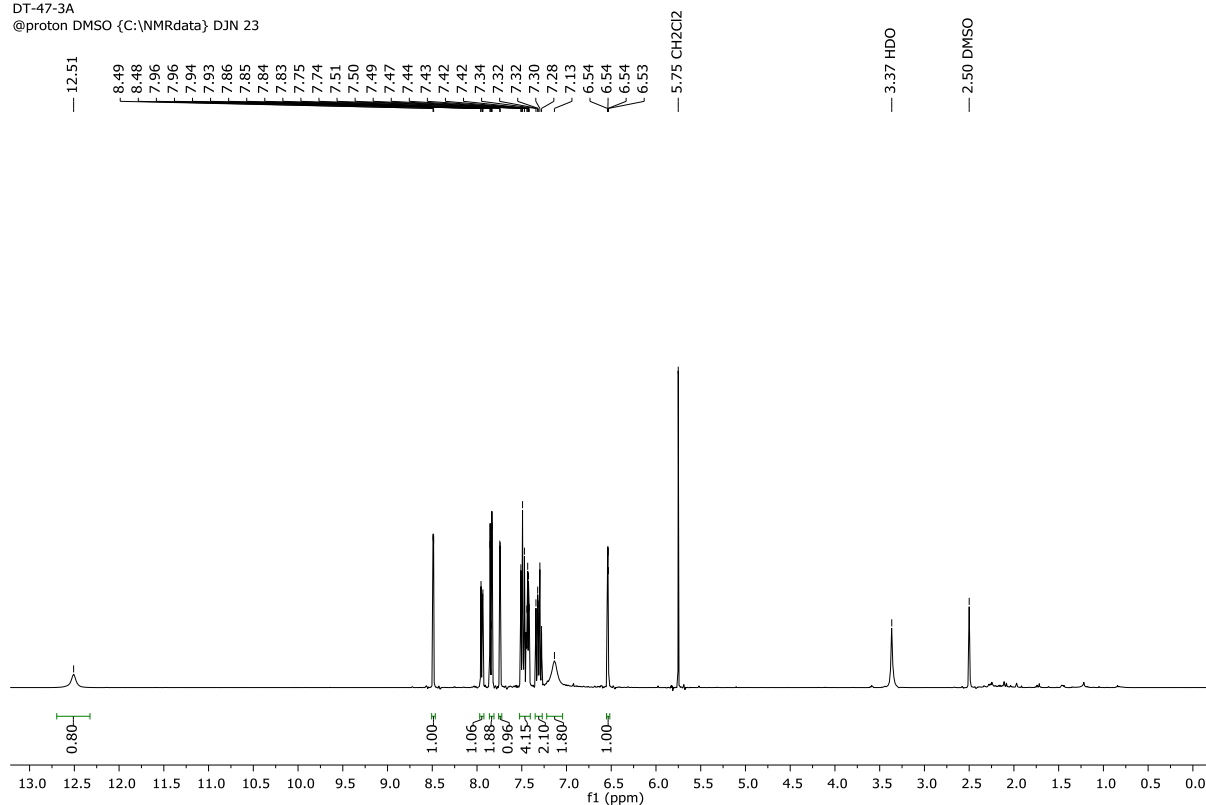

**Figure S164.** <sup>1</sup>H NMR (400 MHz, DMSO-*d*<sub>6</sub>) of the competition experiment between 2-phenylimidazole and 1-phenylpyrazole (entry 3, Table S38).

**Table S39.** Determination of the competition rate constant  $\kappa$  from the labelling experiment between 2-phenylimidazole and 2-phenylpyridine.

|                                                                                                                                                                                                                                                                                                                                                                                            | Substrate <b>R1</b>                                                               | Substrate <b>R2</b>                                                               | Catalyst                         |                       |                       |                  |          |
|--------------------------------------------------------------------------------------------------------------------------------------------------------------------------------------------------------------------------------------------------------------------------------------------------------------------------------------------------------------------------------------------|-----------------------------------------------------------------------------------|-----------------------------------------------------------------------------------|----------------------------------|-----------------------|-----------------------|------------------|----------|
|                                                                                                                                                                                                                                                                                                                                                                                            | 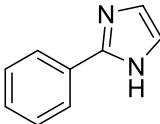 |  | <b>Ir-2</b><br>[(COD)Ir(IMes)Cl] |                       |                       |                  |          |
| <b>Mass</b>                                                                                                                                                                                                                                                                                                                                                                                | 14.4 mg                                                                           | 15.5 mg                                                                           | 3.2 mg                           |                       |                       |                  |          |
| Deuteration expected at $\delta$ ( <b>R1</b> ) = 7.98 – 7.92 ppm and at $\delta$ ( <b>R2</b> ) = 8.11 – 8.06 ppm                                                                                                                                                                                                                                                                           |                                                                                   |                                                                                   |                                  |                       |                       |                  |          |
| Determined against integral at $\delta$ ( <b>R1</b> ) = 7.53 – 7.40 ppm and at $\delta$ ( <b>R2</b> ) = 7.90 – 7.84 ppm                                                                                                                                                                                                                                                                    |                                                                                   |                                                                                   |                                  |                       |                       |                  |          |
| <i>Spectral details of the deuterated reaction mixture:</i>                                                                                                                                                                                                                                                                                                                                |                                                                                   |                                                                                   |                                  |                       |                       |                  |          |
| <sup>1</sup> H NMR (400 MHz, DMSO- <i>d</i> <sub>6</sub> ) $\delta$ = 12.51 (br, 1H, <b>R1</b> ), 8.70 – 8.65 (m, 1H, <b>R2</b> ), 8.11 – 8.06 (m, H/D, <b>R2</b> ), 7.98 – 7.92 (m, H/D, <b>R1</b> and 1H, <b>R2</b> ), 7.90 – 7.84 (m, 1H, <b>R2</b> ), 7.53 – 7.40 (m, 2H, <b>R1</b> and 3H, <b>R2</b> ), 7.37 – 7.30 (m, 1H, <b>R1</b> and 1H, <b>R2</b> ), 7.14 (br, 2H, <b>R1</b> ). |                                                                                   |                                                                                   |                                  |                       |                       |                  |          |
| Entry                                                                                                                                                                                                                                                                                                                                                                                      | $I_{R1(t)}$<br>N = 2H                                                             | $I_{R1(0)}$<br>N = 2H                                                             | %D <sub>R1</sub>                 | $I_{R2(t)}$<br>N = 2H | $I_{R2(0)}$<br>N = 1H | %D <sub>R2</sub> | $\kappa$ |
| <b>1</b>                                                                                                                                                                                                                                                                                                                                                                                   | 0.74 <sup>a</sup>                                                                 | 2.06 <sup>d</sup>                                                                 | 64                               | 1.73                  | 1.00                  | 14               | 7.06     |
| <b>2</b>                                                                                                                                                                                                                                                                                                                                                                                   | 0.80 <sup>b</sup>                                                                 | 2.06 <sup>e</sup>                                                                 | 61                               | 1.78                  | 1.00                  | 11               | 8.12     |
| <b>3</b>                                                                                                                                                                                                                                                                                                                                                                                   | 0.72 <sup>c</sup>                                                                 | 1.94 <sup>f</sup>                                                                 | 64                               | 1.74                  | 1.00                  | 13               | 7.30     |
| <b>Average <math>\kappa</math> = 7.49</b>                                                                                                                                                                                                                                                                                                                                                  |                                                                                   |                                                                                   |                                  |                       |                       |                  |          |
| <sup>a</sup> $I_{R1(t)}$ = 1.74-1.00; <sup>b</sup> $I_{R1(t)}$ = 1.80-1.00; <sup>c</sup> $I_{R1(t)}$ = 1.72-1.00;                                                                                                                                                                                                                                                                          |                                                                                   |                                                                                   |                                  |                       |                       |                  |          |
| <sup>d</sup> $I_{R1(0)}$ = 5.06-1.00×3; <sup>e</sup> $I_{R1(0)}$ = 5.06-1.00×3; <sup>f</sup> $I_{R1(0)}$ = 4.99-1.00×3;                                                                                                                                                                                                                                                                    |                                                                                   |                                                                                   |                                  |                       |                       |                  |          |

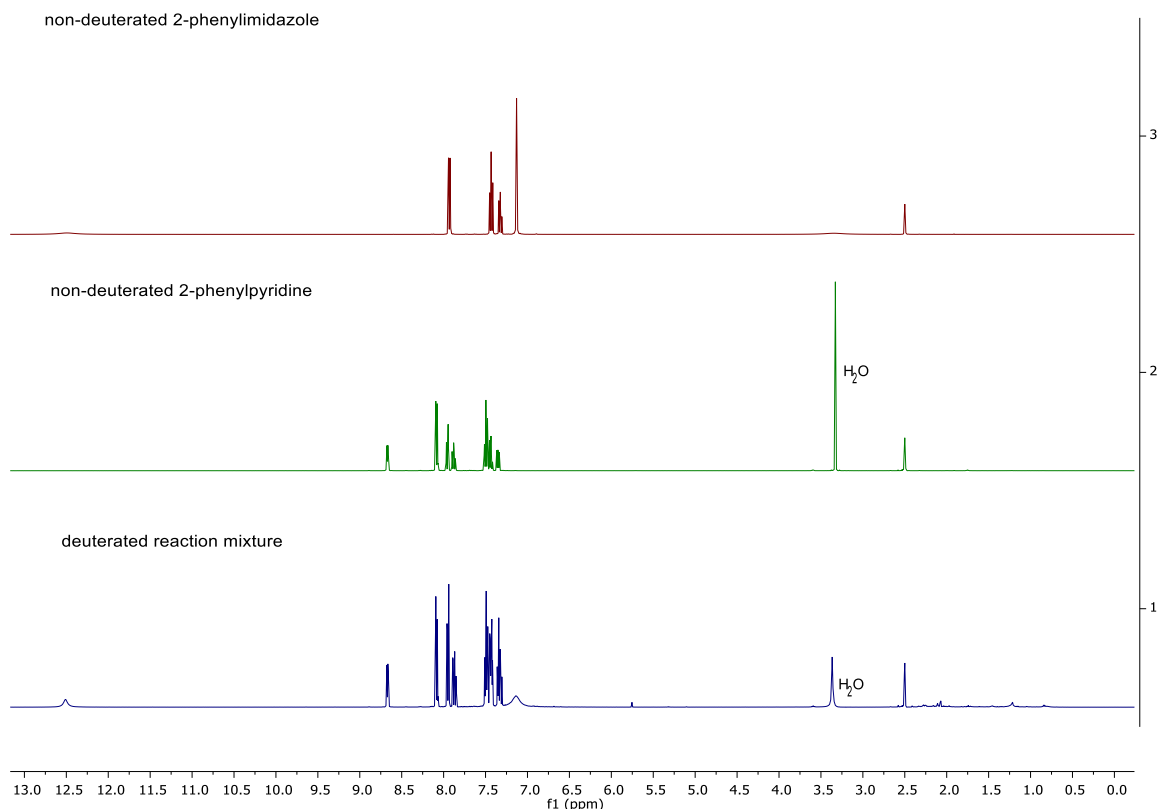

**Figure S165.** Stacked <sup>1</sup>H NMR (400 MHz, DMSO-*d*<sub>6</sub>) of non-deuterated substrates and reaction mixture.

D332366  
 Person kpb19112  
 DT-41  
 @proton DMSO {C:\NMRdata} DJN 25

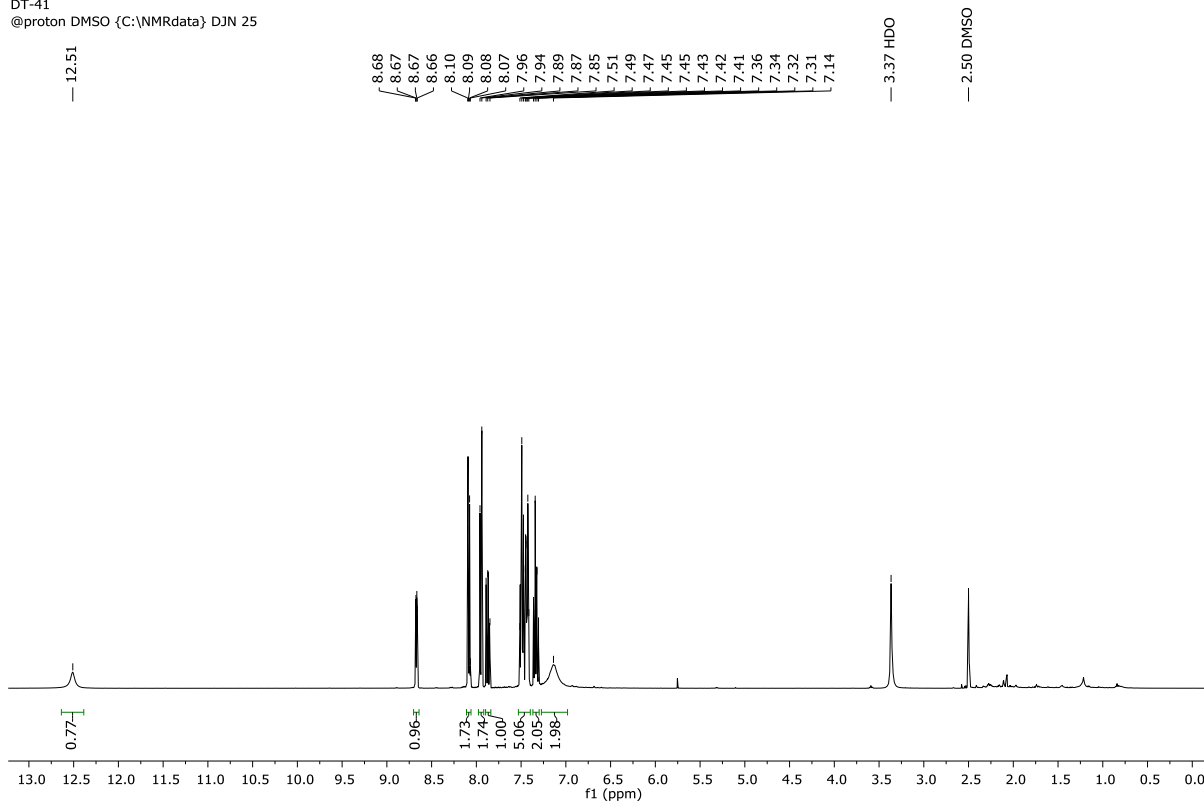

**Figure S166.**  $^1\text{H}$  NMR (400 MHz,  $\text{DMSO-}d_6$ ) of the competition experiment between 2-phenylimidazole and 1-phenylpyridine (entry 1, Table S39).

D332511  
 Person kpb19112  
 DT-41-2  
 @proton DMSO {C:\NMRdata} DJN 8

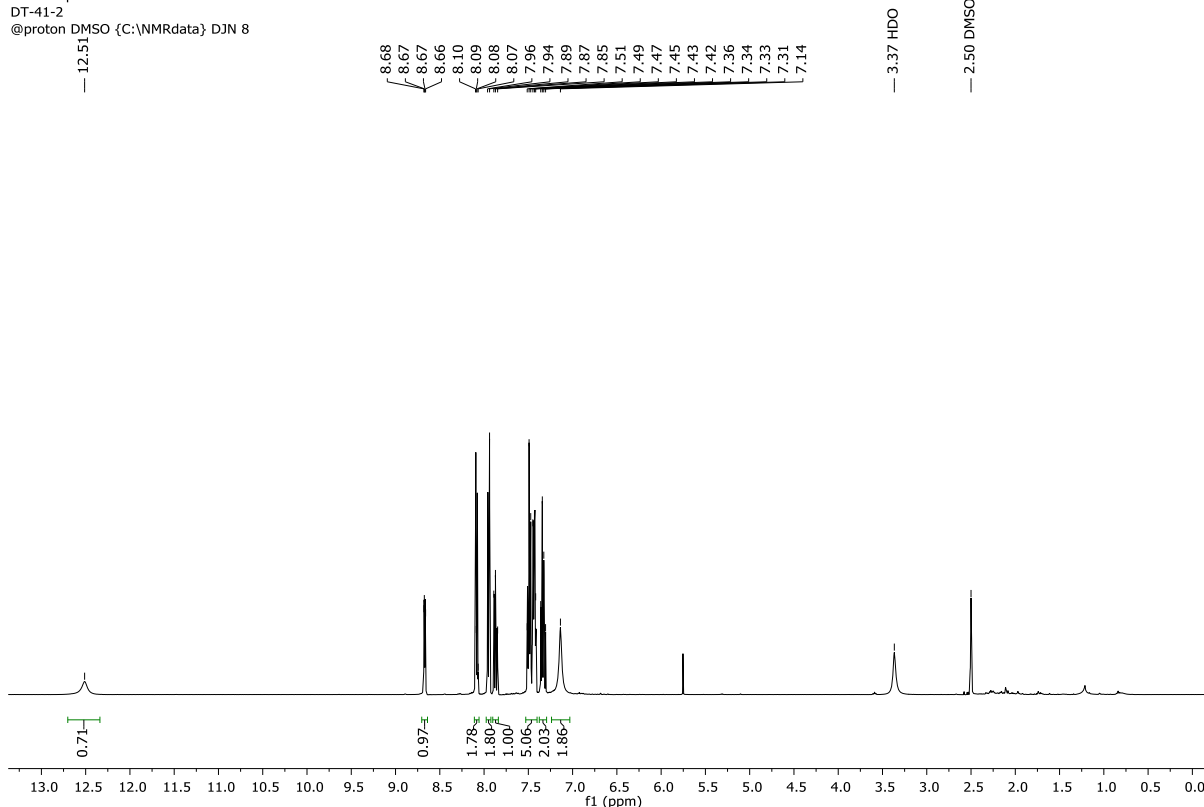

**Figure S167.**  $^1\text{H}$  NMR (400 MHz,  $\text{DMSO-}d_6$ ) of the competition experiment between 2-phenylimidazole and 1-phenylpyridine (entry 2, Table S39).

D332723  
 Person kpb19112  
 DT-41-4  
 @proton DMSO {C:\NMRdata} DJN 8

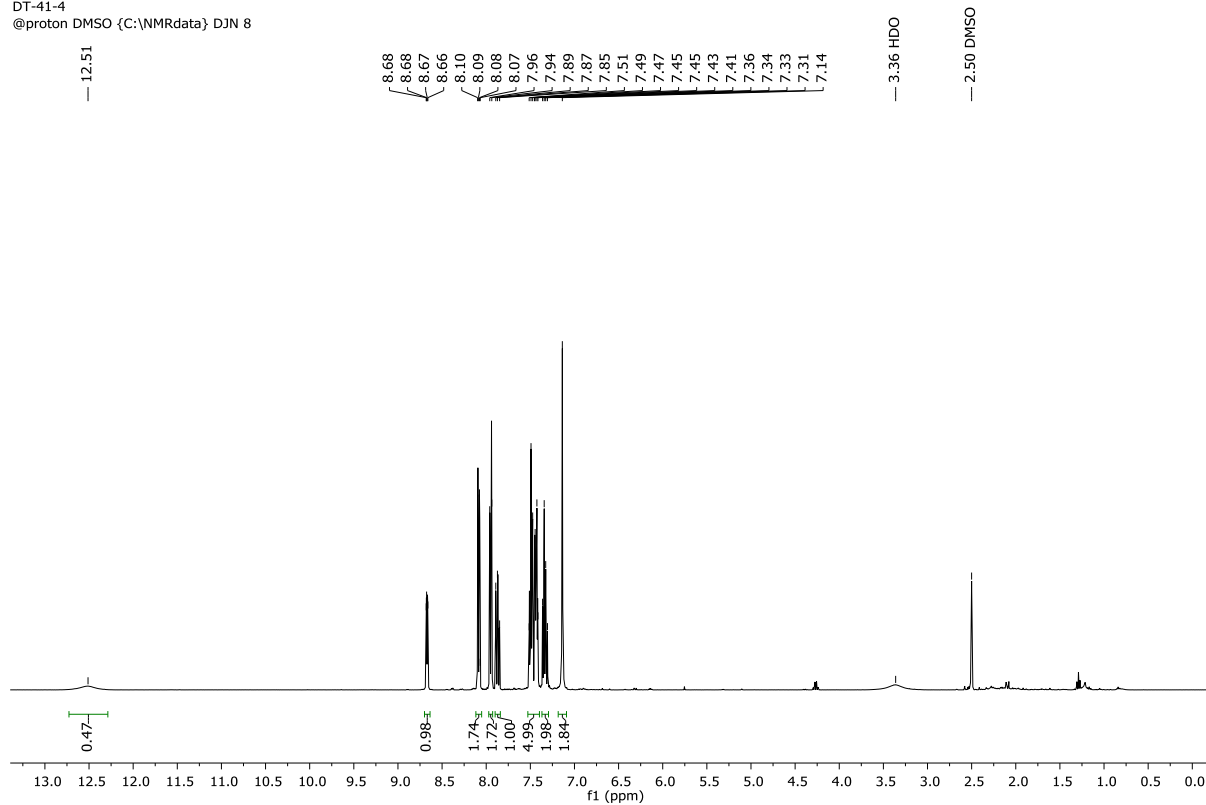

**Figure S168.**  $^1\text{H}$  NMR (400 MHz,  $\text{DMSO}-d_6$ ) of the competition experiment between 2-phenylimidazole and 1-phenylpyridine (entry 3, Table S39).



**Table S40.** Determination of the competition rate constant  $\kappa$  from the labelling experiment between 2-phenylimidazole and 2-phenylpyridine.

|                                                                                                                                                                                                                                                                                                                                               | Substrate <b>R1</b>                                                               | Substrate <b>R2</b>                                                               | Catalyst                         |                              |                              |                  |          |
|-----------------------------------------------------------------------------------------------------------------------------------------------------------------------------------------------------------------------------------------------------------------------------------------------------------------------------------------------|-----------------------------------------------------------------------------------|-----------------------------------------------------------------------------------|----------------------------------|------------------------------|------------------------------|------------------|----------|
|                                                                                                                                                                                                                                                                                                                                               | 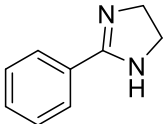 |  | <b>Ir-2</b><br>[(COD)Ir(IMes)Cl] |                              |                              |                  |          |
| Mass                                                                                                                                                                                                                                                                                                                                          | 14.6 mg                                                                           | 15.5 mg                                                                           | 3.2 mg                           |                              |                              |                  |          |
| Deuteration expected at $\delta$ ( <b>R1</b> ) = 7.90 – 7.81 ppm and at $\delta$ ( <b>R2</b> ) = 8.11 – 8.06 ppm                                                                                                                                                                                                                              |                                                                                   |                                                                                   |                                  |                              |                              |                  |          |
| Determined against integral at $\delta$ ( <b>R1</b> ) = 3.61 ppm and at $\delta$ ( <b>R2</b> ) = 7.97 – 7.93 ppm                                                                                                                                                                                                                              |                                                                                   |                                                                                   |                                  |                              |                              |                  |          |
| <i>Spectral details of the deuterated reaction mixture:</i>                                                                                                                                                                                                                                                                                   |                                                                                   |                                                                                   |                                  |                              |                              |                  |          |
| <sup>1</sup> H NMR (400 MHz, DMSO- <i>d</i> <sub>6</sub> ) $\delta$ = 8.70 – 8.64 (m, 1H, <b>R2</b> ), 8.11 – 8.06 (m, 2H/D, <b>R2</b> ), 7.97 – 7.93 (m, 1H, <b>R2</b> ), 7.90 – 7.81 (m, 2H/D, <b>R1</b> and 1H, <b>R2</b> ), 7.53 – 7.39 (m, 3H, <b>R1</b> and 3H, <b>R2</b> ), 7.36 – 7.29 (m, 1H, <b>R2</b> ), 3.61 (m, 4H, <b>R1</b> ). |                                                                                   |                                                                                   |                                  |                              |                              |                  |          |
| Entry                                                                                                                                                                                                                                                                                                                                         | I <sub>R1(t)</sub><br>N = 2H                                                      | I <sub>R1(0)</sub><br>N = 4H                                                      | %D <sub>R1</sub>                 | I <sub>R2(t)</sub><br>N = 2H | I <sub>R2(0)</sub><br>N = 1H | %D <sub>R2</sub> | $\kappa$ |
| <b>1</b>                                                                                                                                                                                                                                                                                                                                      | 0.86 <sup>a</sup>                                                                 | 3.48                                                                              | 51                               | 1.72                         | 1.00                         | 14               | 4.67     |
| <b>2</b>                                                                                                                                                                                                                                                                                                                                      | 1.17 <sup>b</sup>                                                                 | 3.37                                                                              | 31                               | 1.81                         | 1.00                         | 10               | 3.65     |
| <b>3</b>                                                                                                                                                                                                                                                                                                                                      | 1.14 <sup>c</sup>                                                                 | 3.41                                                                              | 33                               | 1.84                         | 1.00                         | 8                | 4.83     |
| <b>Average <math>\kappa</math> = 4.38</b>                                                                                                                                                                                                                                                                                                     |                                                                                   |                                                                                   |                                  |                              |                              |                  |          |
| <sup>a</sup> I <sub>R1(0)</sub> = 1.86-1.00; <sup>b</sup> I <sub>R1(0)</sub> = 2.17-1.00; <sup>c</sup> I <sub>R1(0)</sub> = 2.14-1.00;                                                                                                                                                                                                        |                                                                                   |                                                                                   |                                  |                              |                              |                  |          |

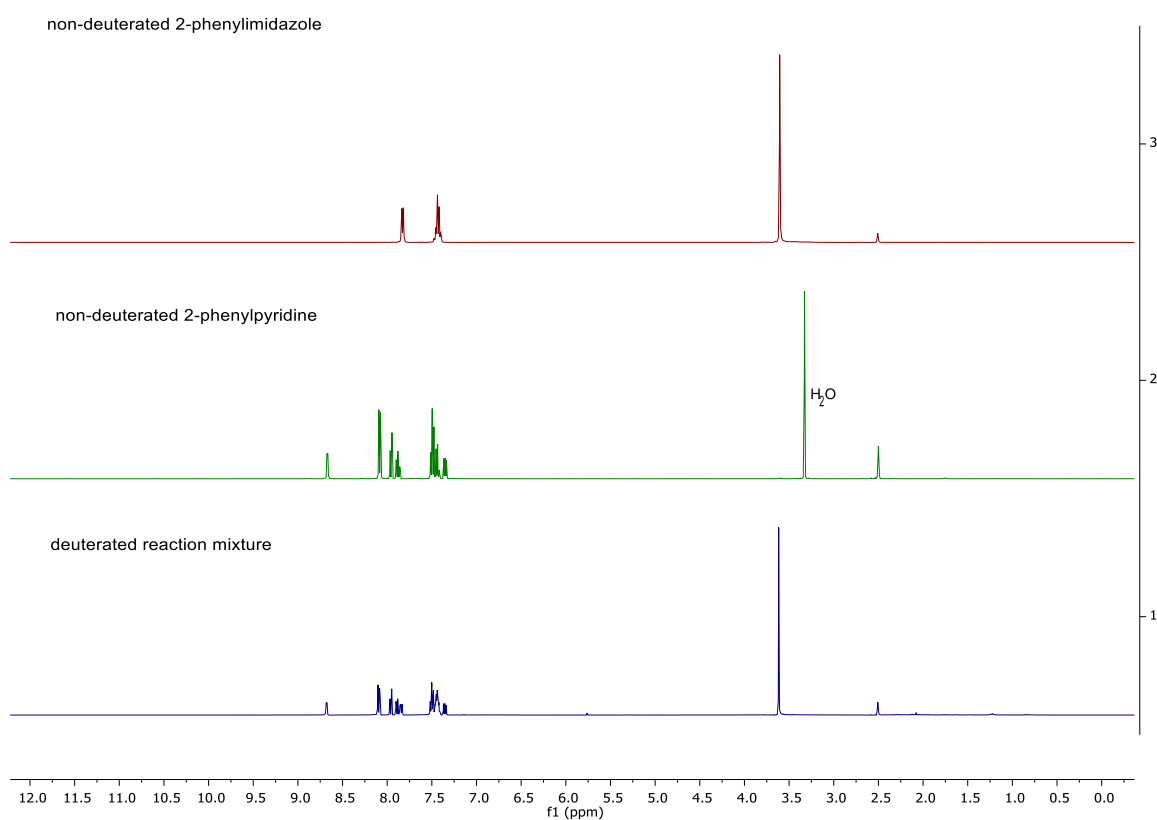

**Figure S169.** Stacked <sup>1</sup>H NMR (400 MHz, DMSO-*d*<sub>6</sub>) of non-deuterated substrates and reaction mixture.

D332368  
 Person kpb19112  
 DT-49  
 @proton DMSO {C:\NMRdata} DJN 27

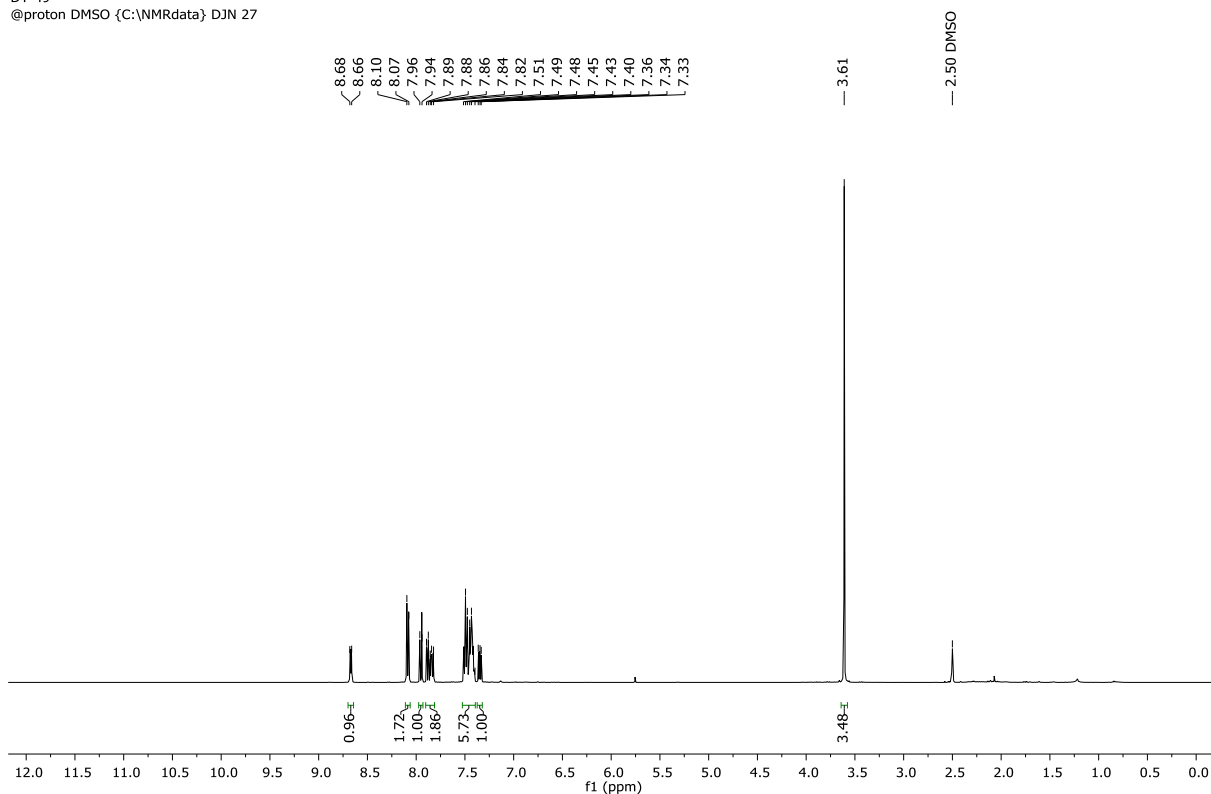

**Figure S170.**  $^1\text{H}$  NMR (400 MHz,  $\text{DMSO-}d_6$ ) of the competition experiment between 2-phenylimidazoline and 2-phenylpyridine (entry 1, Table S40).

D332516  
 Person kpb19112  
 DT-49-3  
 @proton DMSO {C:\NMRdata} DJN 13

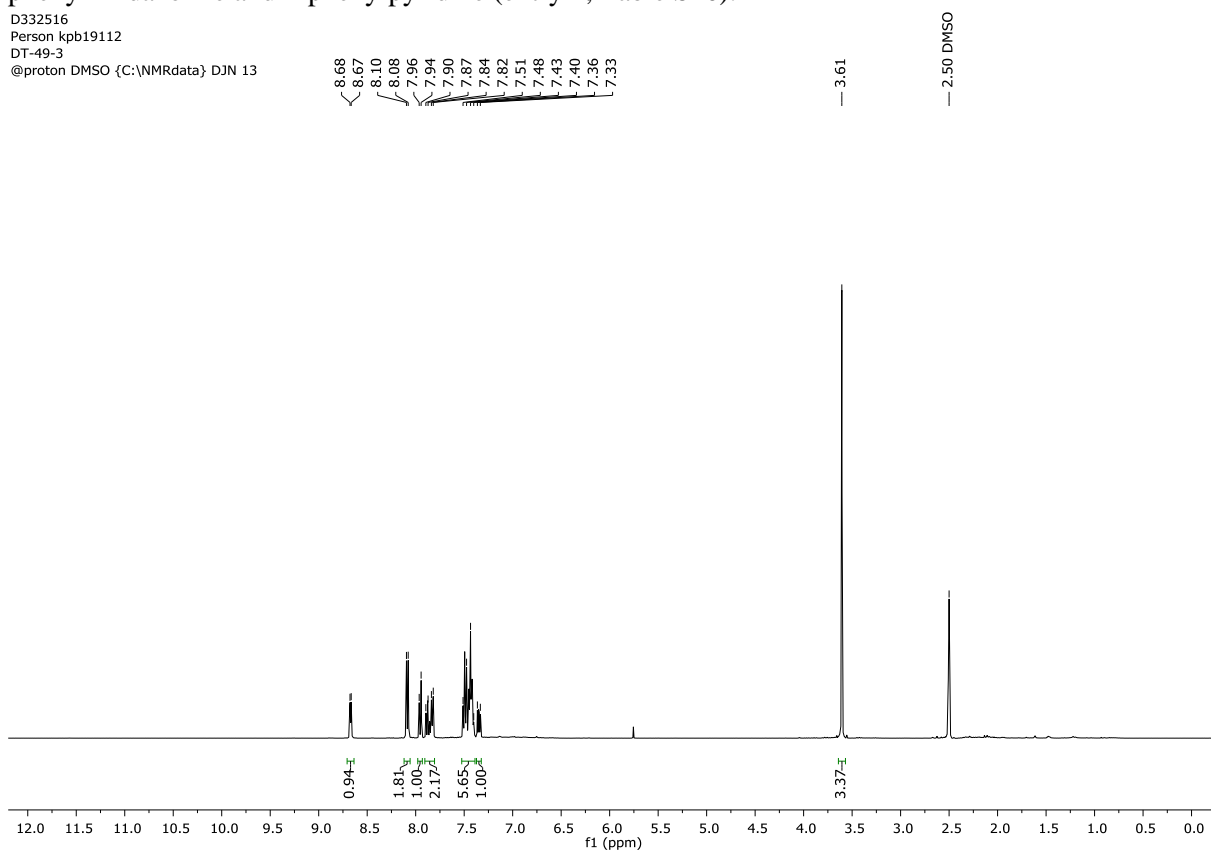

**Figure S171.**  $^1\text{H}$  NMR (400 MHz,  $\text{DMSO-}d_6$ ) of the competition experiment between 2-phenylimidazoline and 2-phenylpyridine (entry 2, Table S40).

D332725  
 Person kpb19112  
 DT-49-4  
 @proton DMSO {C:\NMRdata} DJN 10

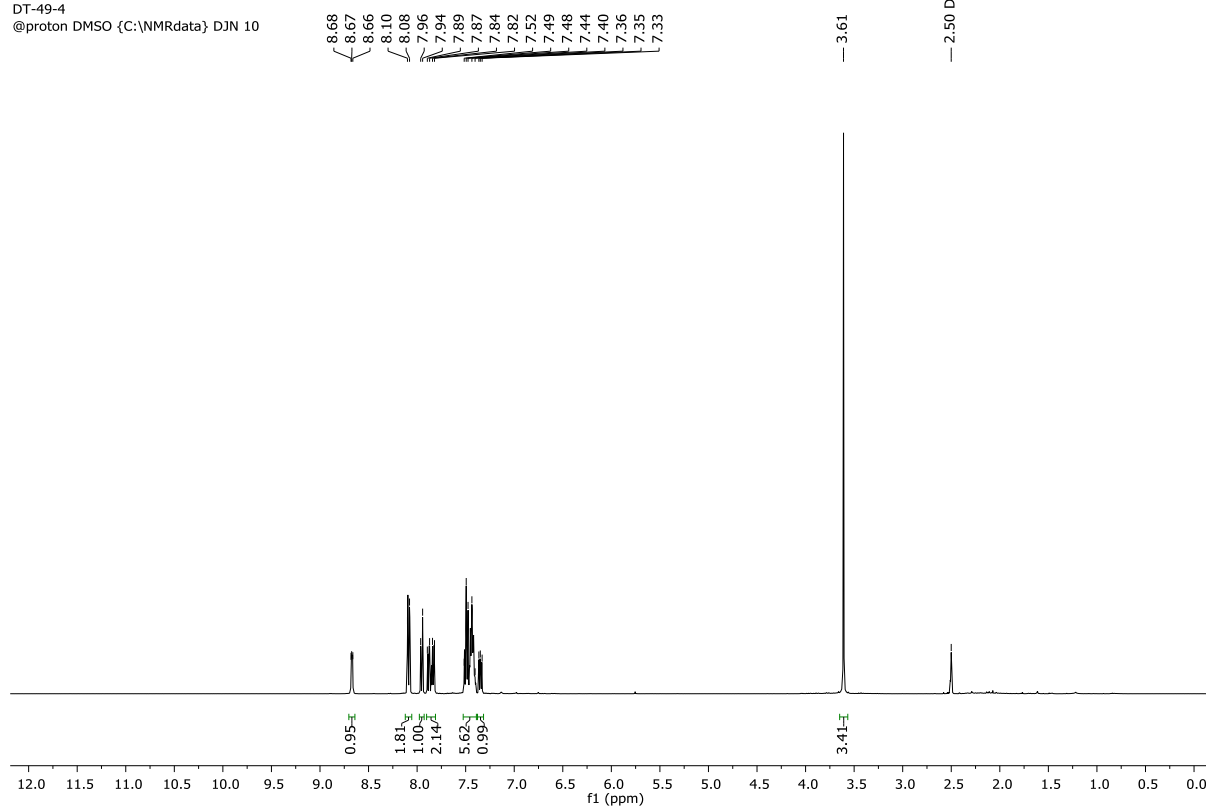

**Figure S172.**  $^1\text{H}$  NMR (400 MHz,  $\text{DMSO}-d_6$ ) of the competition experiment between 2-phenylimidazoline and 2-phenylpyridine (entry 3, Table S40).

**Table S41.** Determination of the competition rate constant  $\kappa$  from the labelling experiment between 2-phenylimidazoline and 2-phenylimidazole.

|                                                                                                                                                                                                                                                                    | Substrate <b>R1</b>                                                               | Substrate <b>R2</b>                                                               | Catalyst                         |                              |                              |                  |          |
|--------------------------------------------------------------------------------------------------------------------------------------------------------------------------------------------------------------------------------------------------------------------|-----------------------------------------------------------------------------------|-----------------------------------------------------------------------------------|----------------------------------|------------------------------|------------------------------|------------------|----------|
|                                                                                                                                                                                                                                                                    | 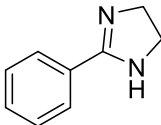 |  | <b>Ir-2</b><br>[(COD)Ir(IMes)Cl] |                              |                              |                  |          |
| Mass                                                                                                                                                                                                                                                               | 14.6 mg                                                                           | 14.4 mg                                                                           | 3.2 mg                           |                              |                              |                  |          |
| Deuteration expected at $\delta$ ( <b>R1</b> ) = 7.86 – 7.80 ppm and at $\delta$ ( <b>R2</b> ) = 7.98 – 7.90 ppm<br>Determined against integral at $\delta$ = 3.61 ppm for <b>R1</b> and at $\delta$ = 7.36 – 7.29 ppm for <b>R2</b>                               |                                                                                   |                                                                                   |                                  |                              |                              |                  |          |
| <i>Spectral details of the deuterated reaction mixture:</i>                                                                                                                                                                                                        |                                                                                   |                                                                                   |                                  |                              |                              |                  |          |
| $^1\text{H}$ NMR (400 MHz, DMSO- $d_6$ ) $\delta$ = 7.98 – 7.90 (m, 2H/D, <b>R2</b> ), 7.86 – 7.80 (m, 2H/D, <b>R1</b> ), 7.50 – 7.38 (m, 3H, <b>R1</b> and 3H, <b>R2</b> ), 7.36 – 7.29 (m, 1H, <b>R2</b> ), 7.13 (br, 2H, <b>R2</b> ), 3.61 (s, 4H, <b>R1</b> ). |                                                                                   |                                                                                   |                                  |                              |                              |                  |          |
| Entry                                                                                                                                                                                                                                                              | $I_{\text{R1(t)}}$<br>N = 2H                                                      | $I_{\text{R1(0)}}$<br>N = 4H                                                      | %D <sub>R1</sub>                 | $I_{\text{R2(t)}}$<br>N = 2H | $I_{\text{R2(0)}}$<br>N = 1H | %D <sub>R2</sub> | $\kappa$ |
| <b>1</b>                                                                                                                                                                                                                                                           | 1.09                                                                              | 3.41                                                                              | 36                               | 1.39                         | 1.00                         | 31               | 1.23     |
| <b>2</b>                                                                                                                                                                                                                                                           | 1.09                                                                              | 3.47                                                                              | 37                               | 1.26                         | 1.00                         | 37               | 1.01     |
| <b>3</b>                                                                                                                                                                                                                                                           | 1.17                                                                              | 3.58                                                                              | 35                               | 1.33                         | 1.00                         | 34               | 1.04     |
| Average $\kappa$ = 1.09                                                                                                                                                                                                                                            |                                                                                   |                                                                                   |                                  |                              |                              |                  |          |

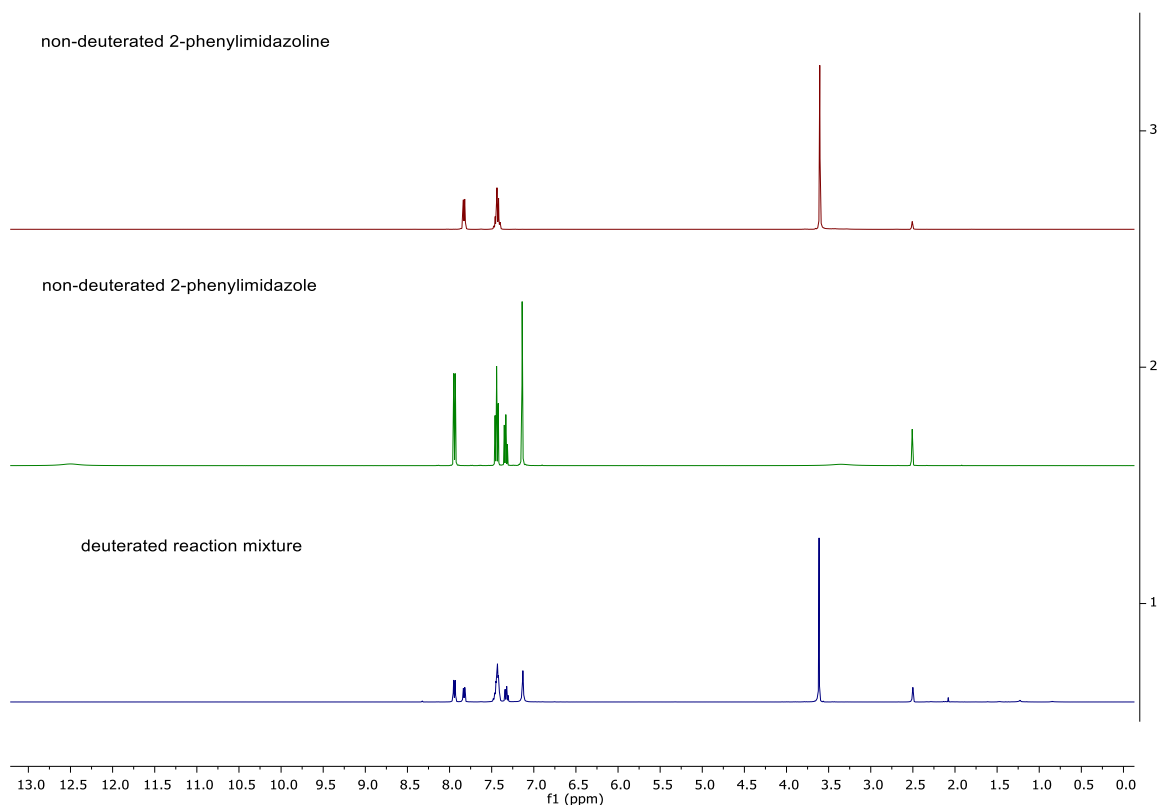

**Figure S173.** Stacked  $^1\text{H}$  NMR (400 MHz, DMSO- $d_6$ ) of non-deuterated substrates and reaction mixture.

D331148  
 Person kpb19112  
 DT-81-2  
 @proton DMSO {C:\NMRdata} DJN 36

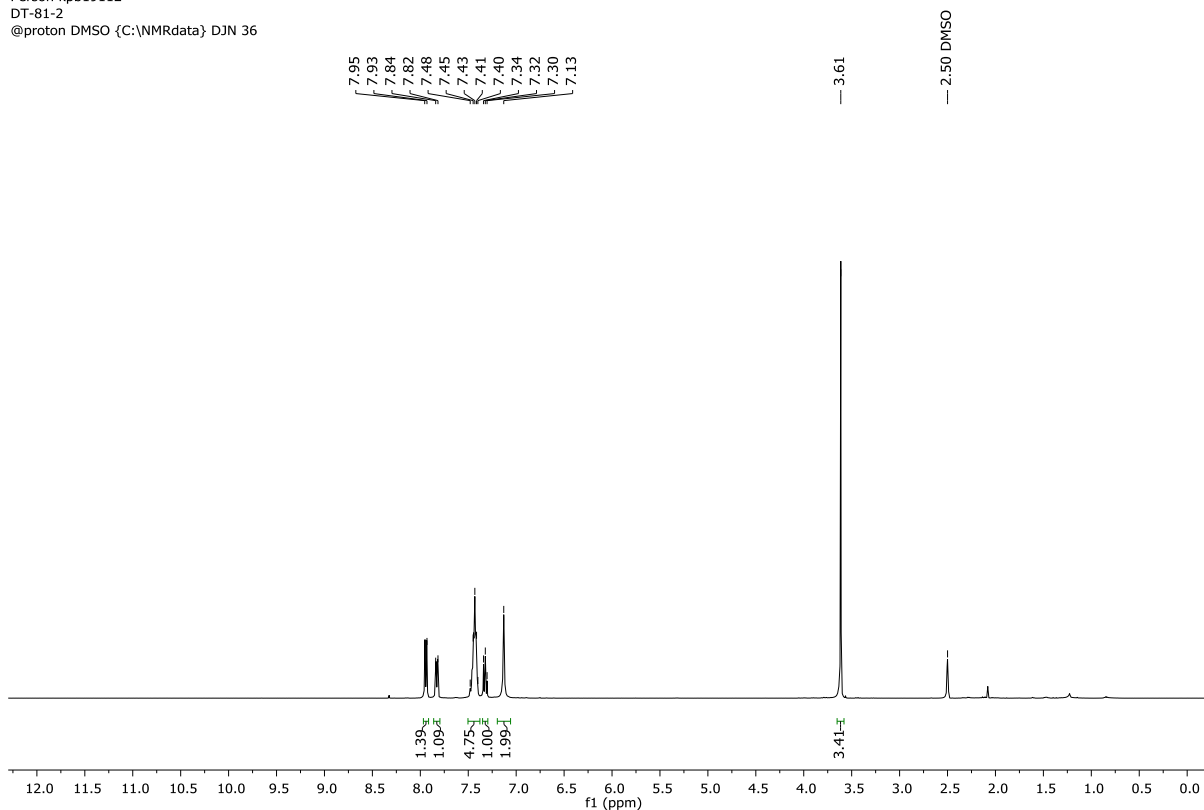

**Figure S174.**  $^1\text{H}$  NMR (400 MHz,  $\text{DMSO}-d_6$ ) of the competition experiment between 2-phenylimidazoline and 2-phenylimidazole (entry 1, Table S41).

D331149  
 Person kpb19112  
 DT-81-3  
 @proton DMSO {C:\NMRdata} DJN 37

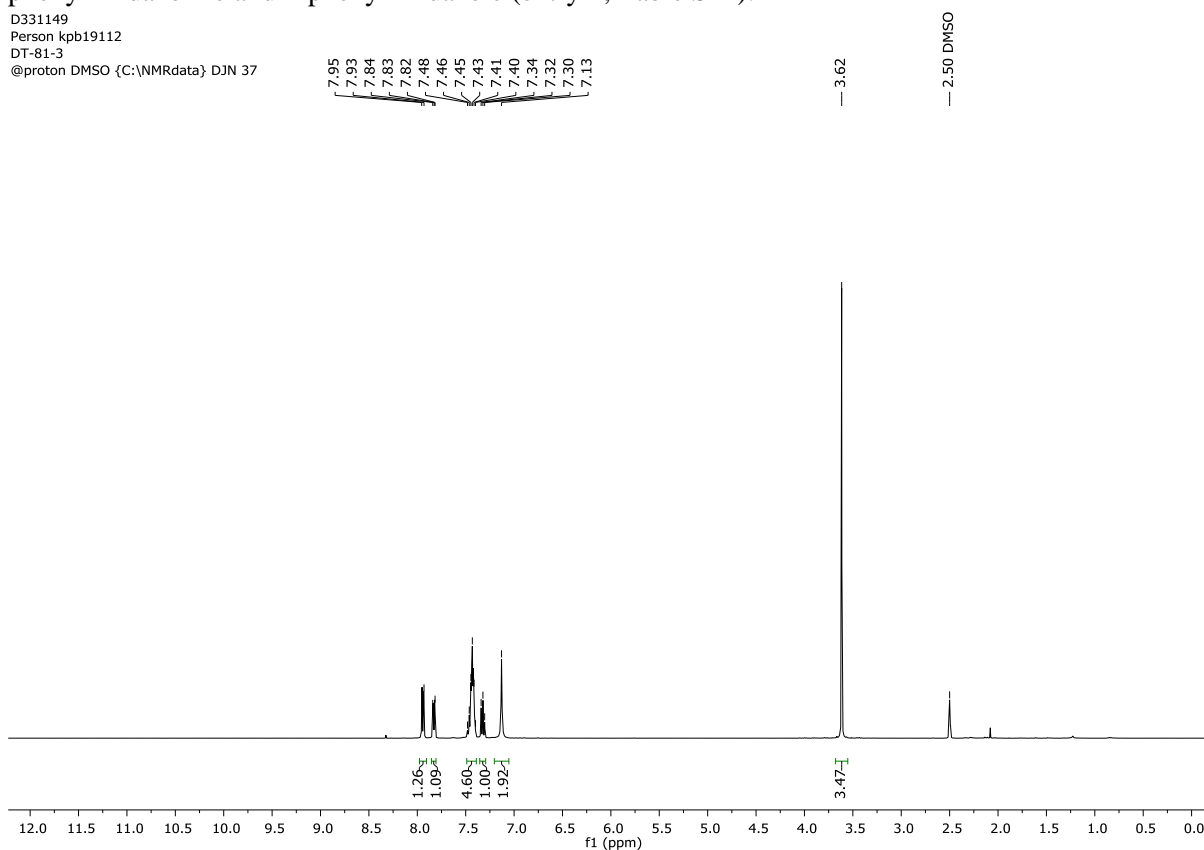

**Figure S175.**  $^1\text{H}$  NMR (400 MHz,  $\text{DMSO}-d_6$ ) of the competition experiment between 2-phenylimidazoline and 2-phenylimidazole (entry 2, Table S41).

D332726  
 Person kpb19112  
 DT-81-4  
 @proton DMSO {C:\NMRdata} DJN 113

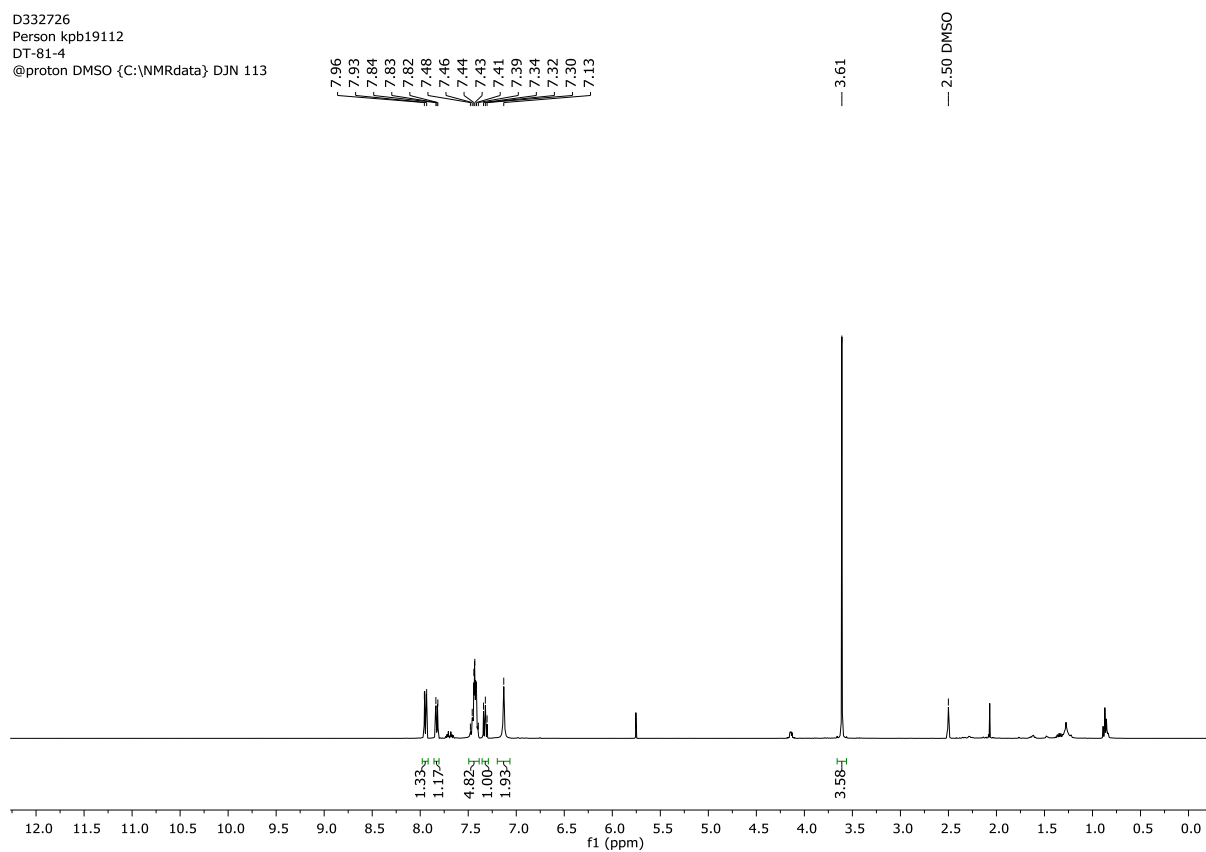

**Figure S176.**  $^1\text{H}$  NMR (400 MHz,  $\text{DMSO}-d_6$ ) of the competition experiment between 2-phenylimidazoline and 2-phenylimidazole (entry 3, Table S41).

### 3.5. Linear Regression Analysis.

Linear regression analysis of the experimentally obtained data set ( $\kappa^{\text{exptl}}$ ) was performed to find the optimised  $k_{\text{rel}}$  values, which represent the relative rates of reaction of the different substrates, by minimising the sum of the squares of the errors  $\Sigma\Delta^2$ , where  $\Delta^2 = \Sigma(\kappa^{\text{exptl}} - \kappa^{\text{calcd}})^2$  using Excel's Solver.

Calculated competition rate constants  $\kappa^{\text{calcd}}$  are expressed by equation (S-6)

$$\log \kappa = \log k_1 - \log k_2 \quad (\text{S-6})$$

The pyridine directing group was assigned as the reference substrate with  $k_{\text{rel}} = 1$ . All  $k_{\text{rel}}$  were constrained to be  $\geq 0.001$ .

Solving the resulting overdetermined set of linear equations (eq. S-6) by least squares minimization yielded the  $k_{\text{rel}}$  values listed in Tables S42-S43.

**Table S42.** Linear regression analysis for  $k_{rel}$  determination for catalyst **Ir-1**.

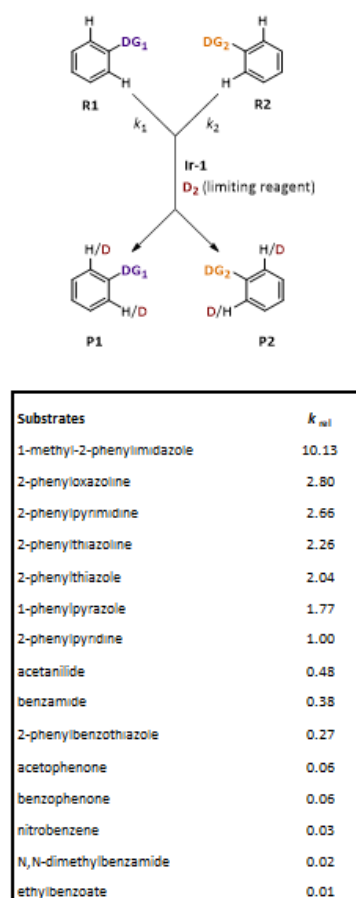

All  $k_{rel}$  constrained  $\geq 0.001$

|        | Catalyst: [(COD)Ir(IMes)PPh <sub>3</sub> BArF <sub>24</sub> ] | Competition Rate Constants |                        |                        |                   | Errors                   |                                      | Standard                   |                |                     |                                   |
|--------|---------------------------------------------------------------|----------------------------|------------------------|------------------------|-------------------|--------------------------|--------------------------------------|----------------------------|----------------|---------------------|-----------------------------------|
|        |                                                               | Experimental               |                        | Calculated from Solver |                   | $\Delta$ (exptl - calcd) | $(\Delta \text{ (exptl - calcd)})^2$ | Averaged $k_{rel}^{exptl}$ | Deviation (SD) | Standard Error (SE) | $k_{rel}^{calcd}/k_{rel}^{exptl}$ |
|        |                                                               | $k_{rel}^{exptl}$          | $\log k_{rel}^{exptl}$ | $\log k_{rel}^{calcd}$ | $k_{rel}^{calcd}$ |                          |                                      |                            |                |                     |                                   |
| DT-10  | acetophenone vs benzophenone                                  | 0.99                       | -0.01                  | 0.003                  | 1.01              | -0.02                    | 0.00                                 | 1.01                       | 0.02           | 0.01                | 1.00                              |
| DT-14  | benzamide vs acetophenone                                     | 6.14                       | 0.79                   | 0.80                   | 6.31              | -0.17                    | 0.03                                 | 6.26                       | 0.11           | 0.07                | 1.01                              |
| DT-16  | acetophenone vs N,N-dimethylbenzamide                         | 3.18                       | 0.50                   | 0.59                   | 3.91              | -0.73                    | 0.54                                 | 3.91                       | 0.84           | 0.48                | 1.00                              |
| DT-52  | nitrobenzene vs ethylbenzoate                                 | 5.58                       | 0.75                   | 0.76                   | 5.75              | -0.17                    | 0.03                                 | 6.35                       | 0.67           | 0.38                | 0.91                              |
| DT-12  | acetophenone vs nitrobenzene                                  | 3.52                       | 0.55                   | 0.27                   | 1.86              | 1.65                     | 2.73                                 | 3.39                       | 0.18           | 0.10                | 0.55                              |
| DT-51  | acetophenone vs ethylbenzoate                                 | 9.63                       | 0.98                   | 1.03                   | 10.71             | -1.08                    | 1.17                                 | 10.38                      | 0.68           | 0.39                | 1.03                              |
| DT-104 | benzamide vs acetanilide                                      | 1.35                       | 0.13                   | -0.11                  | 0.78              | 0.57                     | 0.33                                 | 1.55                       | 0.18           | 0.10                | 0.50                              |
| DT-102 | acetanilide vs nitrobenzene                                   | 15.01                      | 1.18                   | 1.18                   | 15.14             | -0.13                    | 0.02                                 | 15.18                      | 0.40           | 0.23                | 1.00                              |
| DT-6   | 2-phenylpyridine vs acetophenone                              | 16.92                      | 1.23                   | 1.22                   | 16.78             | 0.14                     | 0.02                                 | 16.76                      | 0.24           | 0.14                | 1.00                              |
| DT-103 | 2-phenylpyrimidine vs benzamide                               | 8.90                       | 0.95                   | 0.85                   | 7.07              | 1.82                     | 3.32                                 | 7.12                       | 1.99           | 1.15                | 0.99                              |
| DT-11  | 1-phenylpyrazole vs 2-phenylpyridine                          | 1.52                       | 0.18                   | 0.25                   | 1.77              | -0.25                    | 0.06                                 | 1.71                       | 0.17           | 0.10                | 1.03                              |
| DT-8   | 2-phenyloxazoline vs 2-phenylpyridine                         | 2.25                       | 0.35                   | 0.45                   | 2.80              | -0.55                    | 0.30                                 | 2.90                       | 0.72           | 0.42                | 0.96                              |
| DT-15  | 2-phenylthiazole vs 1-phenylpyrazole                          | 1.01                       | 0.01                   | 0.06                   | 1.15              | -0.14                    | 0.02                                 | 1.07                       | 0.07           | 0.04                | 1.08                              |
| DT-43  | 2-phenylthiazoline vs 2-phenylthiazole                        | 1.04                       | 0.02                   | 0.04                   | 1.11              | -0.07                    | 0.01                                 | 1.03                       | 0.01           | 0.01                | 1.08                              |
| DT-67  | 2-phenyloxazoline vs 2-phenylthiazoline                       | 1.01                       | 0.00                   | 0.09                   | 1.24              | -0.23                    | 0.05                                 | 1.01                       | 0.00           | 0.00                | 1.23                              |
| DT-44  | 2-phenylthiazole vs 2-phenylbenzothiazole                     | 7.26                       | 0.86                   | 0.87                   | 7.48              | -0.22                    | 0.05                                 | 7.48                       | 0.22           | 0.13                | 1.00                              |
| DT-70  | 2-phenylpyridine vs 2-phenylbenzothiazole                     | 3.45                       | 0.54                   | 0.57                   | 3.68              | -0.23                    | 0.05                                 | 3.67                       | 0.33           | 0.19                | 1.00                              |
| DT-77  | 1-methyl-2-phenylimidazole vs 2-phenylthiazoline              | 4.43                       | 0.65                   | 0.65                   | 4.49              | -0.05                    | 0.00                                 | 4.53                       | 1.40           | 0.81                | 0.99                              |
| DT-63  | 1-methyl-2-phenylimidazole vs 2-phenylpyridine                | 10.95                      | 1.04                   | 1.01                   | 10.13             | 0.82                     | 0.67                                 | 10.11                      | 1.23           | 0.71                | 1.00                              |
| DT-83  | 2-phenylpyridine vs 2-phenylpyrimidine                        | 1.28                       | 0.11                   | -0.42                  | 0.38              | 0.90                     | 0.81                                 | 1.19                       | 0.08           | 0.05                | 0.32                              |

Sum of squares of errors: 32.51



**Table S43.** Linear regression analysis for  $k_{rel}$  determination for catalyst **Ir-2**.

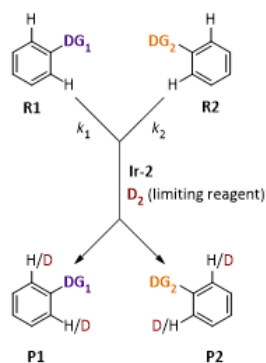

| Substrates                 | $k_{rel}$ |
|----------------------------|-----------|
| 2-phenylimidazole          | 7.11      |
| 2-phenylimidazoline        | 4.45      |
| 1-methyl-2-phenylimidazole | 3.08      |
| 2-phenylpyrimidine         | 1.26      |
| 2-phenylthiazoline         | 1.02      |
| 2-phenylpyridine           | 1.00      |
| 1-phenylpyrazole           | 0.64      |
| 2-phenyloxazoline          | 0.39      |
| 2-phenylthiazole           | 0.24      |
| benzenesulfonamide         | 0.05      |
| acetophenone               | 0.02      |
| benzamide                  | 0.01      |
| N,N-dimethylbenzamide      | 0.002     |
| methylphenylsulfone        | 0.001     |

All  $k_{rel}$  constrained  $\geq 0.001$

| Catalyst: [(COD)Ir(Imes)Cl]                      | Competition Constants   |                      |                  |             | Errors                   |                              | Averaged $k_{exptl}$ | Standard Deviation (SD) | Standard Error (SE) | $k_{calcd}/k_{exptl}$ |
|--------------------------------------------------|-------------------------|----------------------|------------------|-------------|--------------------------|------------------------------|----------------------|-------------------------|---------------------|-----------------------|
|                                                  | $k_{exptl}$             | $\log k_{exptl}$     | $\log k_{calcd}$ | $k_{calcd}$ | $\Delta (exptl - calcd)$ | $(\Delta (exptl - calcd))^2$ |                      |                         |                     |                       |
| acetophenone vs benzamide                        | 1.42<br>1.50<br>1.66    | 0.15<br>0.18<br>0.22 | 0.38             | 2.37        | -0.95<br>-0.87<br>-0.71  | 0.90<br>0.75<br>0.51         | 1.53                 | 0.12                    | 0.07                | 1.55                  |
| benzenesulfonamide vs acetophenone               | 1.07<br>1.39<br>1.27    | 0.03<br>0.14<br>0.10 | 0.34             | 2.17        | -1.09<br>-0.78<br>-0.89  | 1.19<br>0.61<br>0.80         | 1.24                 | 0.16                    | 0.09                | 1.74                  |
| acetophenone vs N,N-dimethylbenzamide            | 9.87<br>9.24<br>10.09   | 0.99<br>0.97<br>1.00 | 0.99             | 9.73        | 0.13<br>-0.49<br>0.35    | 0.02<br>0.24<br>0.13         | 9.73                 | 0.44                    | 0.25                | 1.00                  |
| benzenesulfonamide vs benzamide                  | 5.44<br>6.30<br>4.84    | 0.74<br>0.80<br>0.68 | 0.71             | 5.14        | 0.30<br>1.16<br>-0.30    | 0.09<br>1.35<br>0.09         | 5.53                 | 0.74                    | 0.42                | 0.93                  |
| 1-phenylpyrazole vs acetophenone                 | 28.94<br>28.05<br>32.17 | 1.46<br>1.45<br>1.51 | 1.47             | 29.72       | -0.78<br>-1.67<br>2.45   | 0.61<br>2.79<br>6.00         | 29.72                | 2.17                    | 1.25                | 1.00                  |
| benzenesulfonamide vs methylphenylsulfone        | 32.07<br>40.55<br>43.56 | 1.51<br>1.61<br>1.64 | 1.59             | 38.73       | -6.66<br>1.82<br>4.83    | 44.34<br>3.33<br>23.37       | 38.73                | 5.96                    | 3.44                | 1.00                  |
| 1-phenylpyrazole vs 2-phenylpyridine             | 1.44<br>1.32<br>1.37    | 0.16<br>0.12<br>0.14 | -0.19            | 0.64        | 0.80<br>0.68<br>0.74     | 0.64<br>0.47<br>0.54         | 1.38                 | 0.06                    | 0.03                | 0.46                  |
| 2-phenyloxazoline vs 2-phenylpyridine            | 1.46<br>1.33<br>1.43    | 0.16<br>0.12<br>0.16 | -0.41            | 0.39        | 1.07<br>0.95<br>1.04     | 1.15<br>0.89<br>1.09         | 1.41                 | 0.07                    | 0.04                | 0.27                  |
| 1-phenylpyrazole vs 2-phenylthiazole             | 1.58<br>1.79<br>1.49    | 0.20<br>0.25<br>0.17 | 0.43             | 2.70        | -1.12<br>-0.90<br>-1.21  | 1.25<br>0.81<br>1.46         | 1.62                 | 0.16                    | 0.09                | 1.66                  |
| 2-Phenylthiazoline vs 2-phenyloxazoline          | 1.78<br>1.82<br>1.83    | 0.25<br>0.26<br>0.26 | 0.42             | 2.64        | -0.87<br>-0.82<br>-0.81  | 0.75<br>0.67<br>0.65         | 1.81                 | 0.03                    | 0.02                | 1.46                  |
| 1-methyl-2-phenylimidazole vs 2-phenylpyridine   | 2.26<br>1.84<br>1.93    | 0.35<br>0.27<br>0.28 | 0.49             | 3.08        | -0.82<br>-1.24<br>-1.15  | 0.67<br>1.53<br>1.33         | 2.01                 | 0.22                    | 0.13                | 1.53                  |
| 1-methyl-2-phenylimidazole vs 2-phenyloxazoline  | 8.55<br>7.61<br>8.74    | 0.93<br>0.88<br>0.94 | 0.90             | 7.98        | 0.57<br>-0.36<br>0.77    | 0.32<br>0.13<br>0.59         | 8.30                 | 0.60                    | 0.35                | 0.96                  |
| 1-methyl-2-phenylimidazole vs 2-phenylthiazole   | 12.98<br>14.29<br>12.39 | 1.11<br>1.15<br>1.09 | 1.11             | 13.00       | -0.01<br>1.29<br>-0.61   | 0.00<br>1.66<br>0.37         | 13.22                | 0.97                    | 0.56                | 0.98                  |
| 1-methyl-2-phenylimidazole vs 2-phenylthiazoline | 2.78<br>1.82<br>2.28    | 0.44<br>0.26<br>0.36 | 0.48             | 3.02        | -0.24<br>-1.20<br>-0.74  | 0.06<br>1.43<br>0.55         | 2.29                 | 0.48                    | 0.28                | 1.32                  |
| 2-Phenylpyrimidine vs 2-phenylpyridine           | 1.17<br>1.27<br>1.33    | 0.07<br>0.10<br>0.12 | 0.10             | 1.26        | -0.09<br>0.01<br>0.07    | 0.01<br>0.00<br>0.01         | 1.26                 | 0.08                    | 0.05                | 1.00                  |
| 2-phenylimidazoline vs 2-phenylimidazole         | 1.23<br>1.01<br>1.04    | 0.09<br>0.00<br>0.02 | -0.20            | 0.63        | 0.60<br>0.38<br>0.42     | 0.36<br>0.14<br>0.17         | 1.09                 | 0.12                    | 0.07                | 0.57                  |
| 2-phenylimidazole vs 2-phenylpyridine            | 7.06<br>8.12<br>7.30    | 0.85<br>0.91<br>0.86 | 0.85             | 7.11        | -0.05<br>1.01<br>0.19    | 0.00<br>1.02<br>0.04         | 7.49                 | 0.55                    | 0.32                | 0.95                  |
| 2-phenylimidazole vs 1-phenylpyrazole            | 10.79<br>10.53<br>11.43 | 1.03<br>1.02<br>1.06 | 1.05             | 11.13       | -0.35<br>-0.61<br>0.30   | 0.12<br>0.37<br>0.09         | 10.91                | 0.46                    | 0.27                | 1.02                  |
| 2-phenylimidazoline vs 2-phenylpyridine          | 4.67<br>3.65<br>4.83    | 0.67<br>0.56<br>0.68 | 0.65             | 4.45        | 0.22<br>-0.80<br>0.38    | 0.05<br>0.63<br>0.14         | 4.38                 | 0.64                    | 0.37                | 1.01                  |

|                           |         |
|---------------------------|---------|
| Sum of squares of errors: | 109.301 |
|---------------------------|---------|

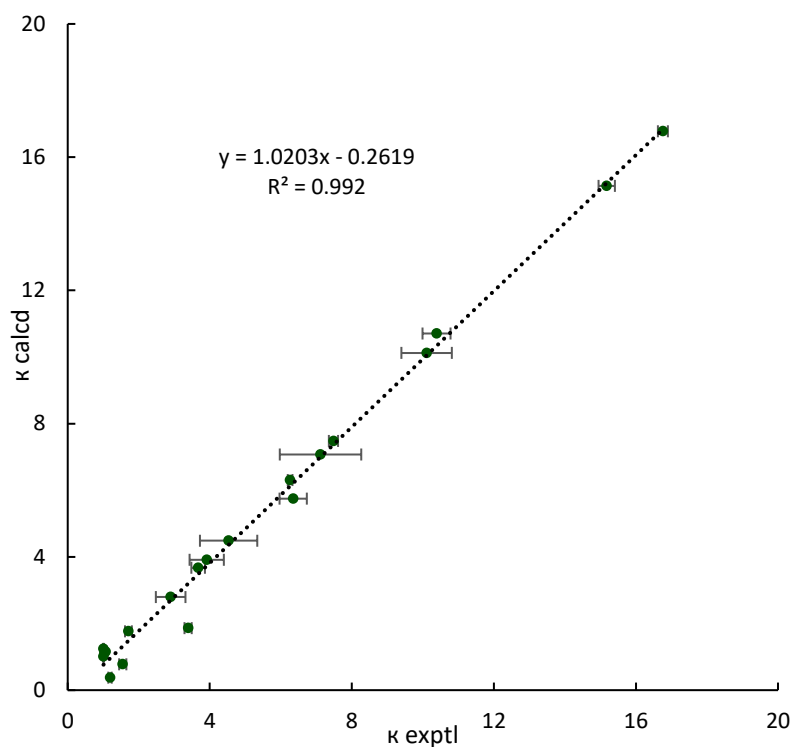

**Figure S177.** Plot of experimental *versus* calculated (from linear regression) competition constants  $\kappa$  for catalyst Ir-1. The error bars correspond to standard error on the mean.

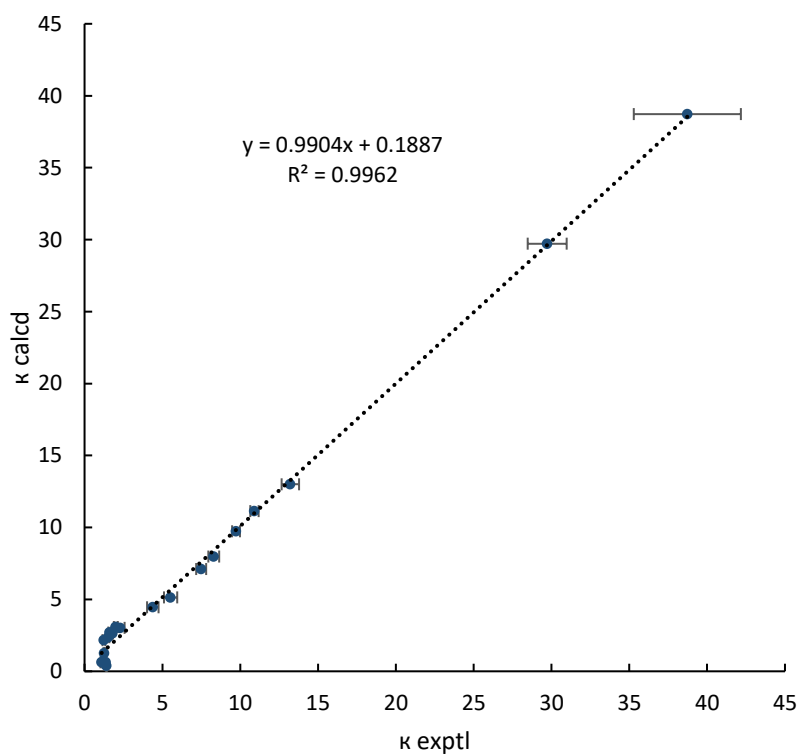

**Figure S178.** Plot of experimental *versus* calculated (from linear regression) competition constants  $\kappa$  for catalyst Ir-2. The error bars correspond to standard error on the mean.

## 4. Intramolecular Competition Experiments

### 4.1. General Information

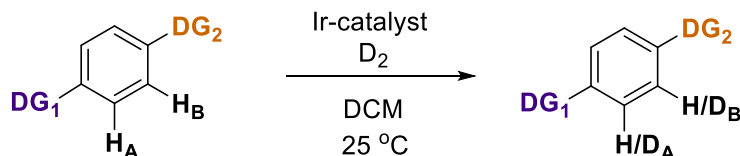

#### General Procedure (GP2)

The substrate (0.10 mmol) and the catalyst (0.005 mmol) of choice were added to one J. Young Schlenk flask under air. The solvent, DCM (6 mL), was added in such a way to rinse the inner walls of the flask. The flask was then sealed (with gas inlet left open) under air before being cooled in a dry ice–acetone bath. The flask was evacuated and flushed with deuterium three times *via* a balloon. The gas inlet was then closed with fast thread tap, creating a sealed atmosphere of deuterium. After sealing the flask was placed in the thermostated water bath at 25 °C and the reaction timer was started. The reaction mixture was stirred for 1 h (for catalyst **Ir-1**) or 16 h (for catalyst **Ir-2**) before removing excess deuterium and replacing it with air. The reaction mixture was quenched with few drops of MeCN and transferred to a single necked flask together with washings (DCM) before removing the solvent under reduced pressure. The residue was dissolved in a small portion of 1:1 mixture of petroleum ether with diethyl ether (or ethyl acetate) and passed through a short plug of silica, eluting with a 1:1 mixture of petroleum ether and diethyl ether (3 × 2 mL), or a 1:1 mixture of petroleum ether with ethyl acetate where necessary, depending on the substrates used. The solvent was evaporated under reduced pressure and the residue was analysed directly by <sup>1</sup>H NMR spectroscopy.

#### Determination of Competition Rate Constants

The level of deuterium incorporation (%D) in the substrates was determined by <sup>1</sup>H NMR. The integrals were calibrated against a peak corresponding to a position not expected to be labelled. Equations S-7 and S-8 were used to calculate the extent of labelling and competition rate constant  $\kappa'$ :

$$\%D = 100 - \left( \frac{\text{residual integral}}{\text{number of labelling sites}} \times 100 \% \right) \quad (\text{S-7})$$

$$\kappa' = \frac{\%D_A}{\%D_B} = \frac{2 - \text{residual integral } H_A}{2 - \text{residual integral } H_B} \quad (\text{S-8})$$

#### 4.1. Competition Experiments with [(COD)Ir(IMes)PPh<sub>3</sub>]BArF<sub>24</sub> (Ir-1)

##### Labelling of *p*-nitroacetophenone

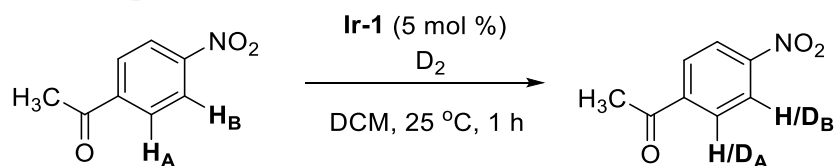

According to GP2: 16.5 mg of substrate and 8.7 mg of catalyst

*Spectral details of the reaction mixture:*

<sup>1</sup>H NMR (400 MHz, CDCl<sub>3</sub>)  $\delta$  = 8.33 – 8.30 (m, 2H, H/D<sub>B</sub>), 8.13 – 8.09 (m, 2H, H/D<sub>A</sub>), 2.68 (s, 3H, CH<sub>3</sub>)

Deuteration expected at  $\delta$  (H<sub>A</sub>) = 8.13 – 8.09 ppm and  $\delta$  (H<sub>B</sub>) = 8.33 – 8.30 ppm.

Determined against integral at  $\delta$  = 2.68 ppm.

**Table S44.** Determination of the competition rate constant  $\kappa'$  from the labelling of *p*-nitroacetophenone.

| Entry          | residual integral   |                  | residual integral   |                  | $\kappa'$   |
|----------------|---------------------|------------------|---------------------|------------------|-------------|
|                | (H/D <sub>A</sub> ) | % D <sub>A</sub> | (H/D <sub>B</sub> ) | % D <sub>B</sub> |             |
| 1              | 0.84                | 58               | 1.13                | 44               | 1.33        |
| 2              | 1.12                | 44               | 1.32                | 34               | 1.29        |
| 3              | 0.97                | 52               | 1.22                | 39               | 1.32        |
| <b>Average</b> |                     | <b>51</b>        |                     | <b>39</b>        | <b>1.32</b> |

D326360  
Person kpb19112  
DT-75-1  
@proton CDCl3 {C:\NMRdata} DJN 61

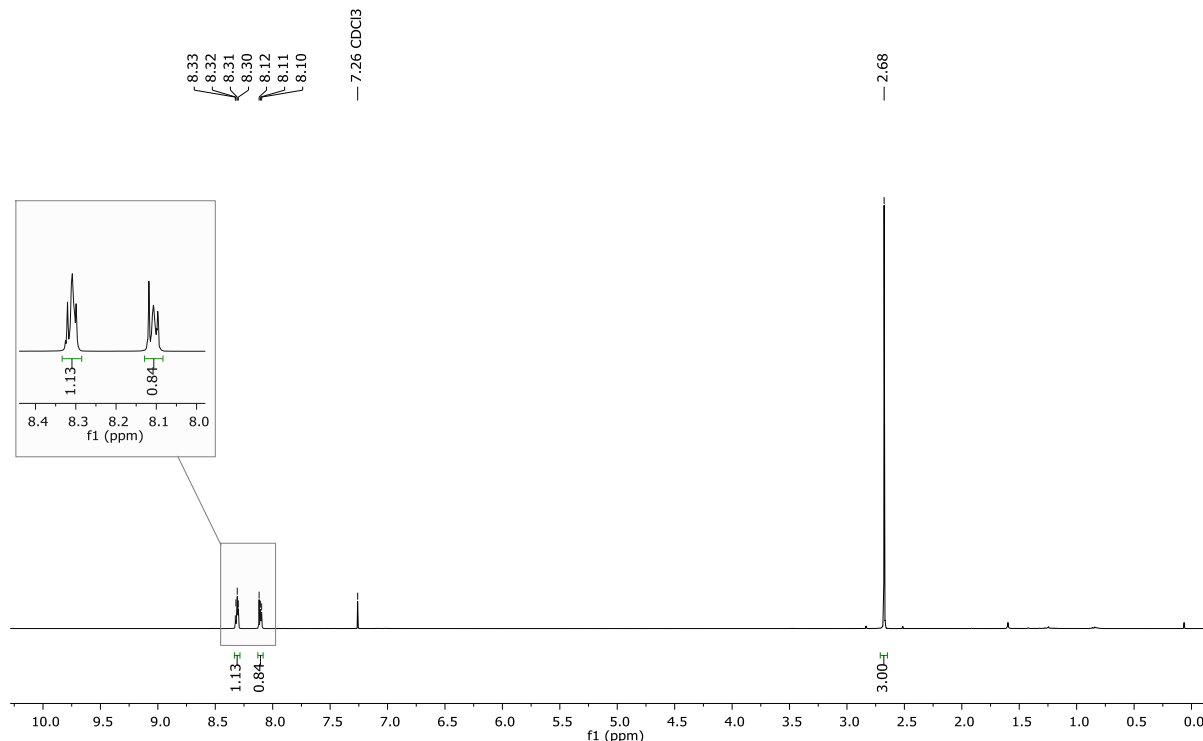

**Figure S179.** <sup>1</sup>H NMR (400 MHz, CDCl<sub>3</sub>) of labelled *p*-nitroacetophenone (entry 1, Table S44)

D326361  
 Person kpb19112  
 DT-75-2  
 @proton CDCl3 {C:\NMRdata} DJN 62

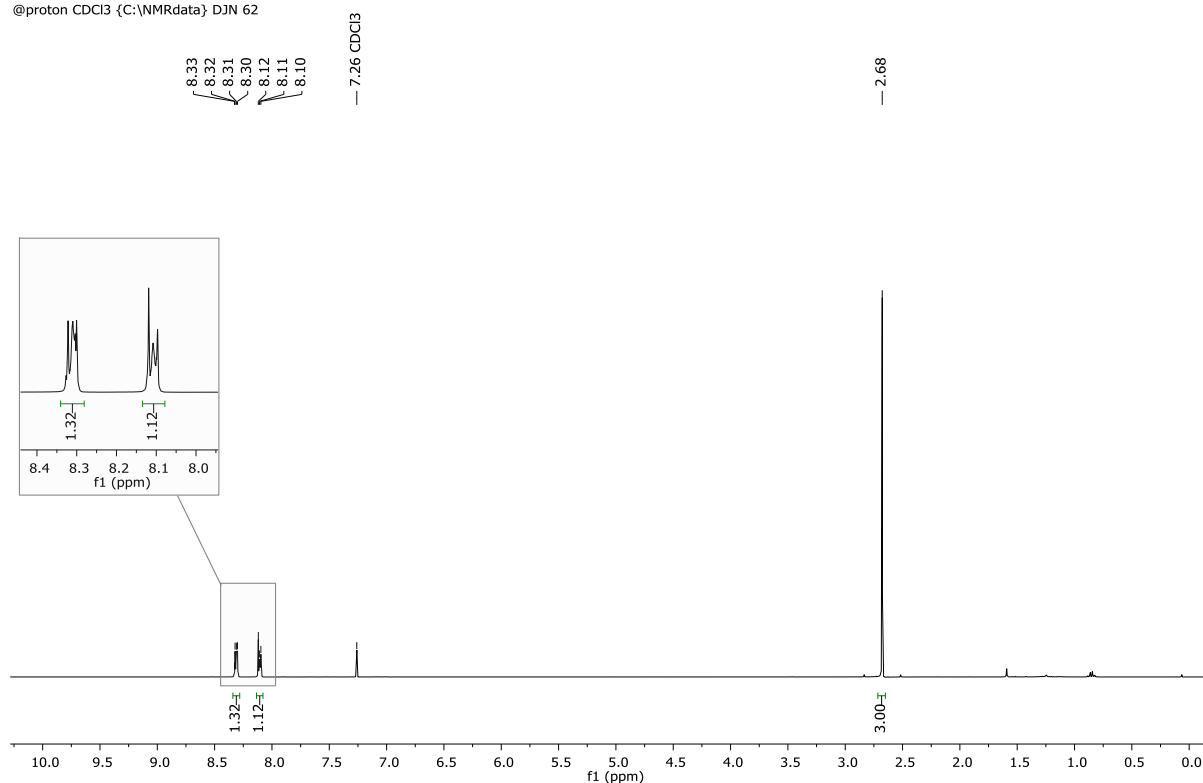

**Figure S180.** <sup>1</sup>H NMR (400 MHz, CDCl<sub>3</sub>) of labelled *p*-nitroacetophenone (entry 2, Table S44)

D326711  
 Person kpb19112  
 DT-75-3  
 @proton CDCl3 {C:\NMRdata} DJN 17

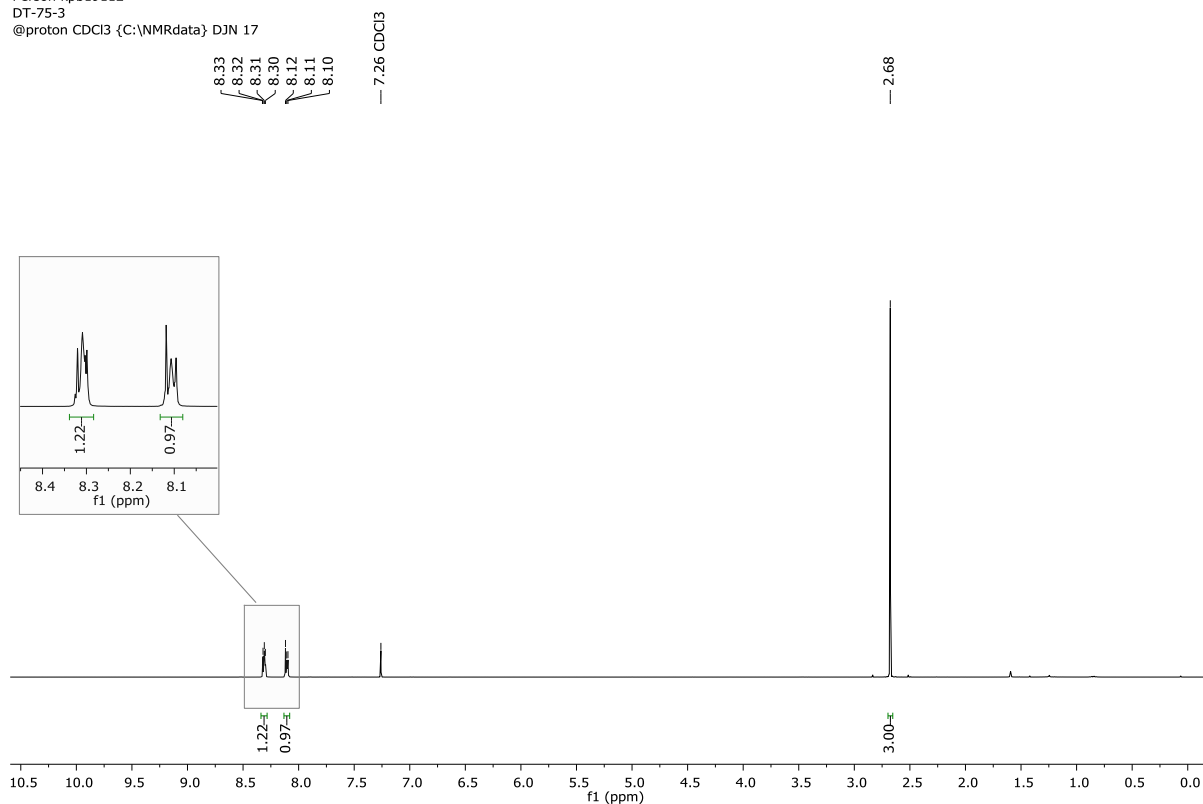

**Figure S181.** <sup>1</sup>H NMR (400 MHz, CDCl<sub>3</sub>) of labelled *p*-nitroacetophenone (entry 3, Table SX)

## Labelling of ethyl 4-nitrobenzoate

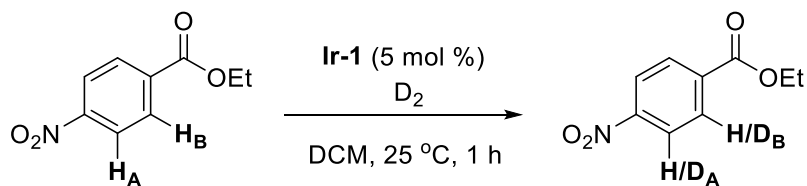

According to GP2: 19.5 mg of substrate and 8.7 mg of catalyst

*Spectral details of the reaction mixture:*

$^1\text{H}$  NMR (400 MHz,  $\text{CDCl}_3$ )  $\delta$  8.30 – 8.26 (m, 2H, H/D<sub>A</sub>), 8.23 – 8.18 (m, 2H, H/D<sub>B</sub>), 4.43 (q,  $J = 7.1$  Hz, 2H,  $\text{CH}_2$ ), 1.42 (t,  $J = 7.1$  Hz, 3H,  $\text{CH}_3$ ).

Deuteration expected at  $\delta$  (H<sub>A</sub>) = 8.30 – 8.26 ppm and  $\delta$  (H<sub>B</sub>) = 8.23 – 8.18 ppm.

Determined against integral at  $\delta = 4.43$  ppm.

**Table S45.** Determination of the competition rate constant  $\kappa'$  from the labelling of ethyl 4-nitrobenzoate.

| Entry          | residual integral<br>(H/D <sub>A</sub> ) | % D <sub>A</sub> | residual integral<br>(H/D <sub>B</sub> ) | % D <sub>B</sub> | $\kappa'$   |
|----------------|------------------------------------------|------------------|------------------------------------------|------------------|-------------|
| 1              | 0.85                                     | 58               | 1.09                                     | 46               | 1.26        |
| 2              | 0.81                                     | 60               | 1.11                                     | 45               | 1.34        |
| 3              | 1.23                                     | 39               | 1.34                                     | 33               | 1.17        |
| <b>Average</b> |                                          | <b>52</b>        |                                          | <b>41</b>        | <b>1.26</b> |

D324289  
Person kpb19112  
DT-64-1  
@proton  $\text{CDCl}_3$  {C:\NMRdata} DJN 15

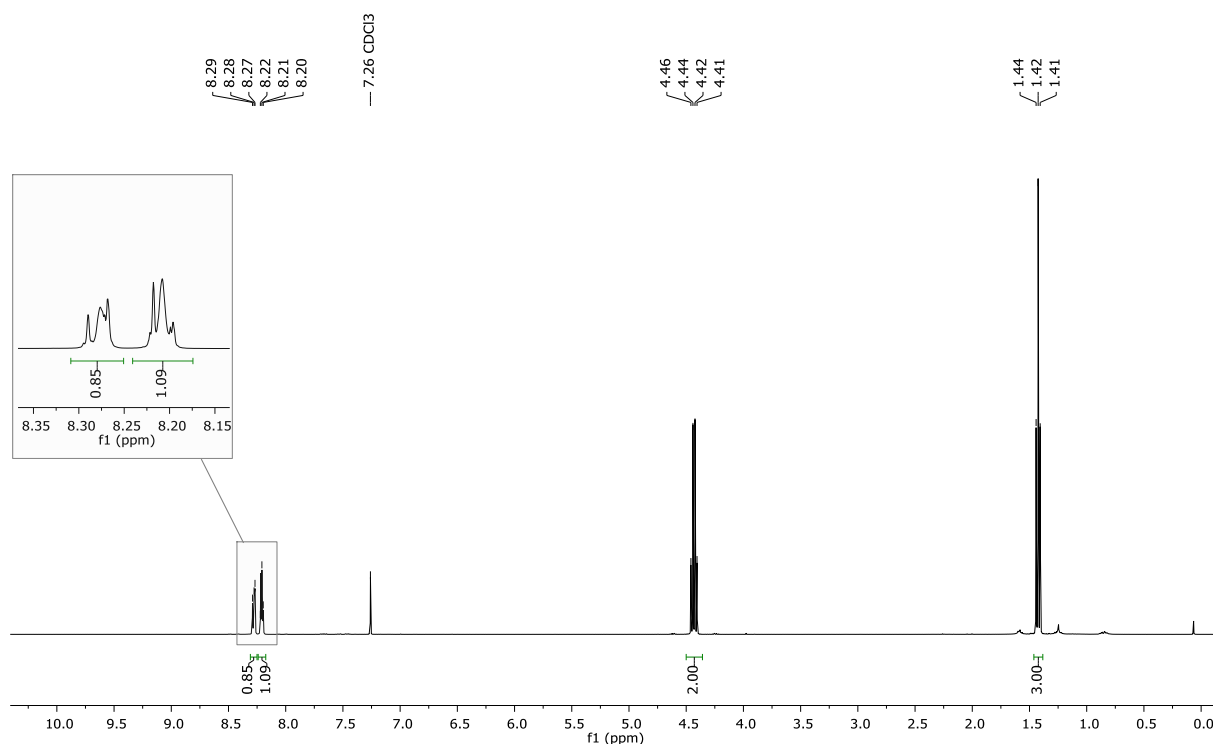

**Figure S182.**  $^1\text{H}$  NMR (400 MHz,  $\text{CDCl}_3$ ) of labelled ethyl 4-nitrobenzoate (entry 1, Table S45)

D324295  
 Person kpb19112  
 DT-64-2  
 @proton CDCl3 {C:\NMRdata} DJN 21

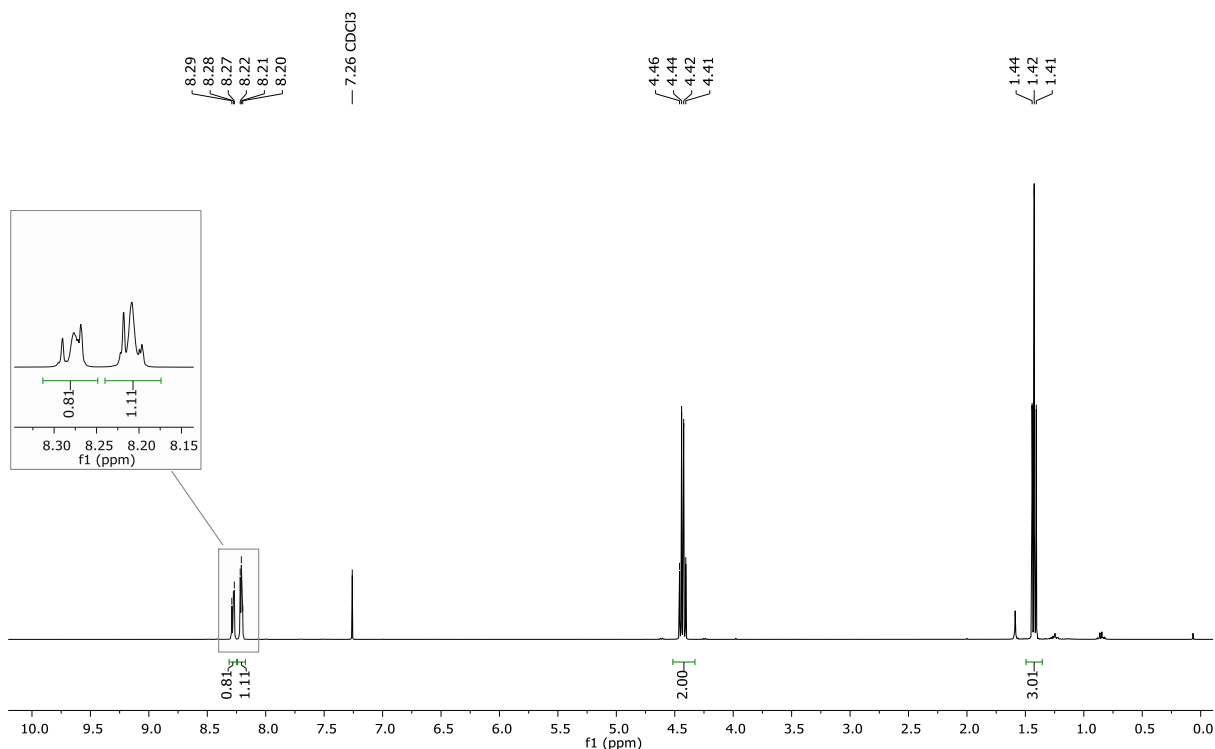

**Figure S183.** <sup>1</sup>H NMR (400 MHz, CDCl<sub>3</sub>) of labelled ethyl 4-nitrobenzoate (entry 2, Table S45)

D324296  
 Person kpb19112  
 DT-64-3  
 @proton CDCl3 {C:\NMRdata} DJN 22

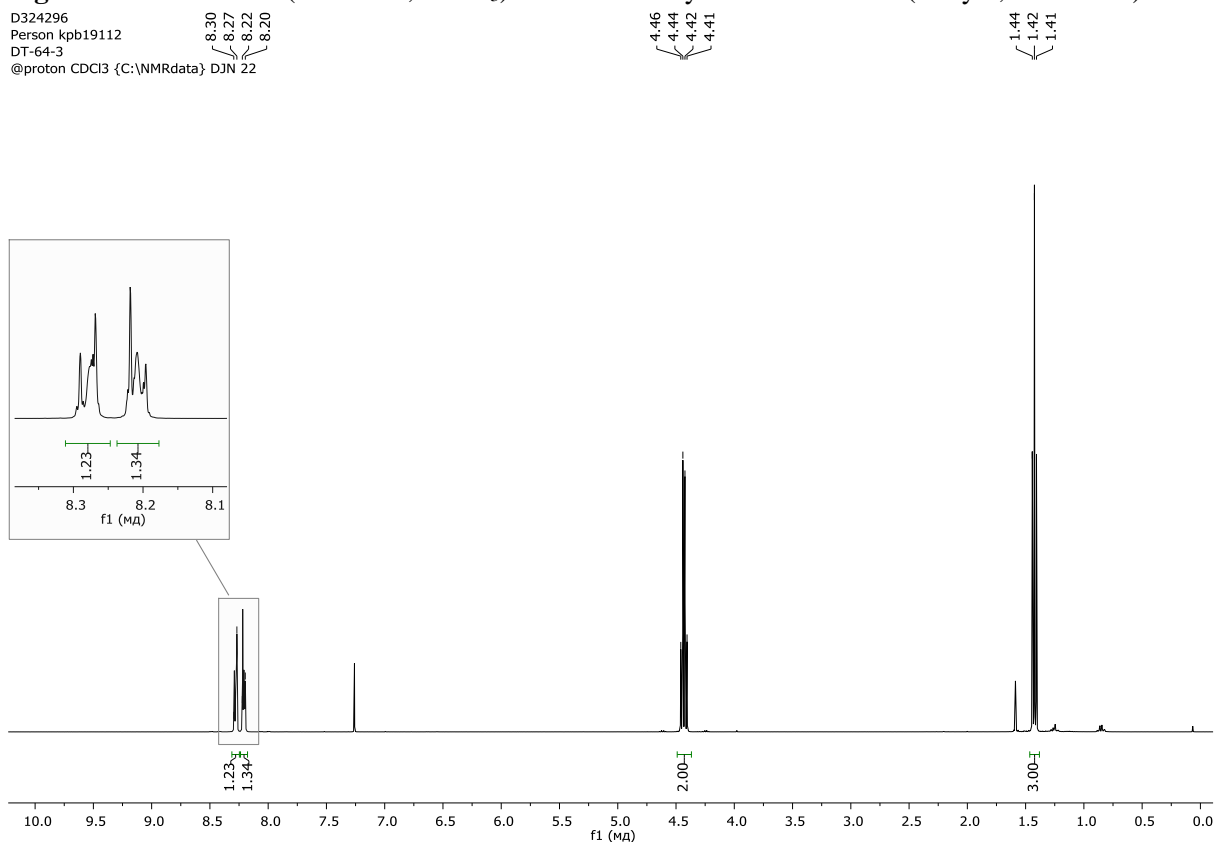

**Figure S184.** <sup>1</sup>H NMR (400 MHz, CDCl<sub>3</sub>) of labelled ethyl 4-nitrobenzoate (entry 3, Table S45)

### Labelling of 4-acetyl-1-(pyridin-2-yl)benzene

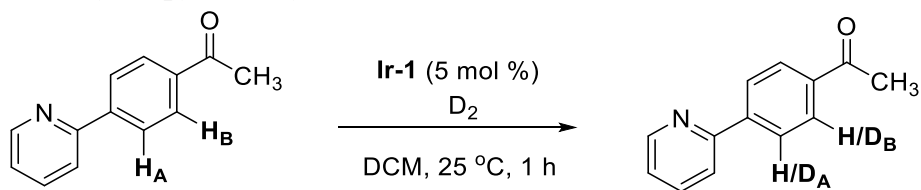

According to GP2: 19.7 mg of substrate and 8.7 mg of catalyst

*Spectral details of the reaction mixture:*

$^1\text{H}$  NMR (400 MHz,  $\text{CDCl}_3$ )  $\delta$  = 8.76 – 8.68 (m, 1H, Ar), 8.12 – 8.08 (m, 2H,  $\text{H}_\text{A}$ ), 8.07 – 8.03 (m, 2H,  $\text{H}_\text{B}$ ), 7.80 – 7.75 (m, 2H, Ar), 7.31 – 7.26 (m, 1H, Ar), 2.65 (s, 3H,  $\text{CH}_3$ ).

Deuteration expected at  $\delta$  ( $\text{H}_\text{A}$ ) = 8.12 – 8.08 ppm and  $\delta$  ( $\text{H}_\text{B}$ ) = 8.07 – 8.03 ppm.

Determined against integral at  $\delta$  = 2.65 ppm.

Note: Small signals, corresponding to the **Ir-1** catalyst, were present in the  $^1\text{H}$  NMR spectra, however there is no overlap with the substrate signals.

**Table S46.** Determination of the competition rate constant  $\kappa'$  from the labelling of 4-acetyl-1-(pyridin-2-yl)benzene.

| Entry          | residual integral<br>( $\text{H}/\text{D}_\text{A}$ ) | % $\text{D}_\text{A}$ | residual integral<br>( $\text{H}/\text{D}_\text{B}$ ) | % $\text{D}_\text{B}$ | $\kappa'$    |
|----------------|-------------------------------------------------------|-----------------------|-------------------------------------------------------|-----------------------|--------------|
| 1              | 1.51                                                  | 25                    | 1.97                                                  | 1.5                   | 16.33        |
| 2              | 1.66                                                  | 17                    | 1.98                                                  | 1.0                   | 17.00        |
| 3              | 1.55                                                  | 23                    | 1.97                                                  | 1.5                   | 15.00        |
| <b>Average</b> |                                                       | <b>21</b>             |                                                       | <b>1.3</b>            | <b>16.11</b> |

D324682  
Person kpb19112  
DT-68-1  
@proton  $\text{CDCl}_3$  {C:\NMRdata} DJN 14

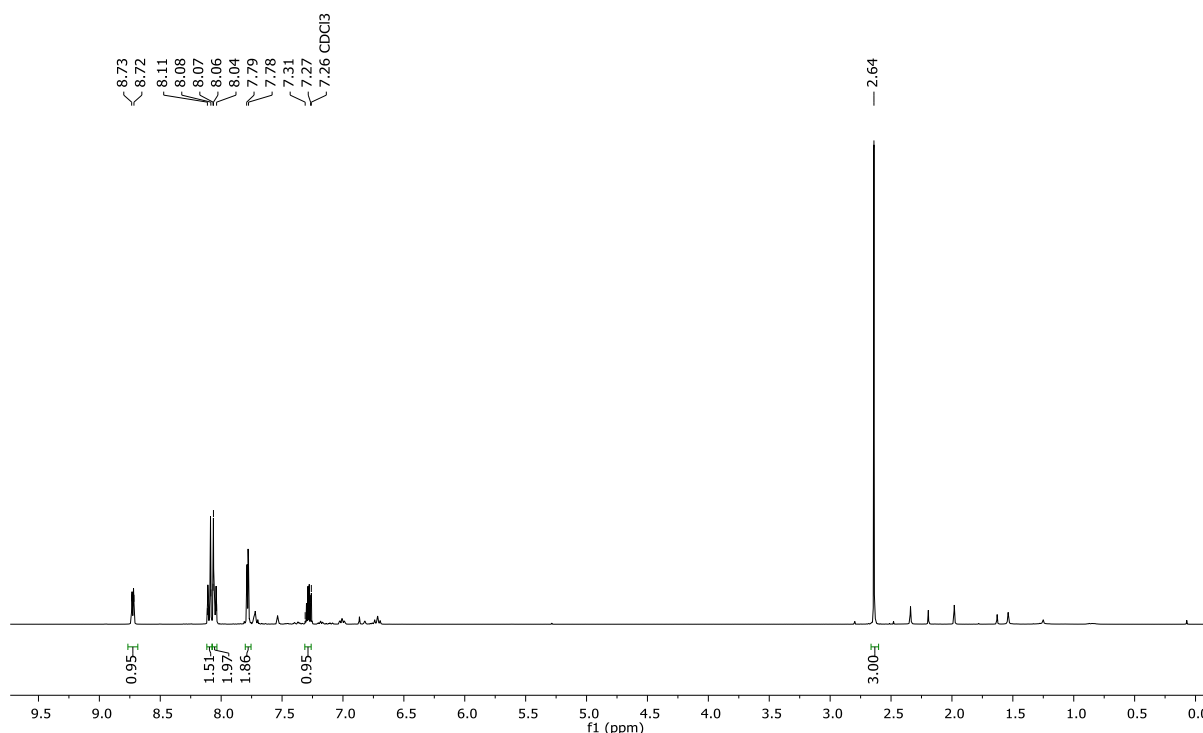

**Figure S185.**  $^1\text{H}$  NMR (400 MHz,  $\text{CDCl}_3$ ) of labelled 4-acetyl-1-(pyridin-2-yl)benzene (entry 1, Table S46)



D324385  
 Person kpb19112  
 DT-69-2  
 @proton CDCl3 {C:\NMRdata} DJN 19

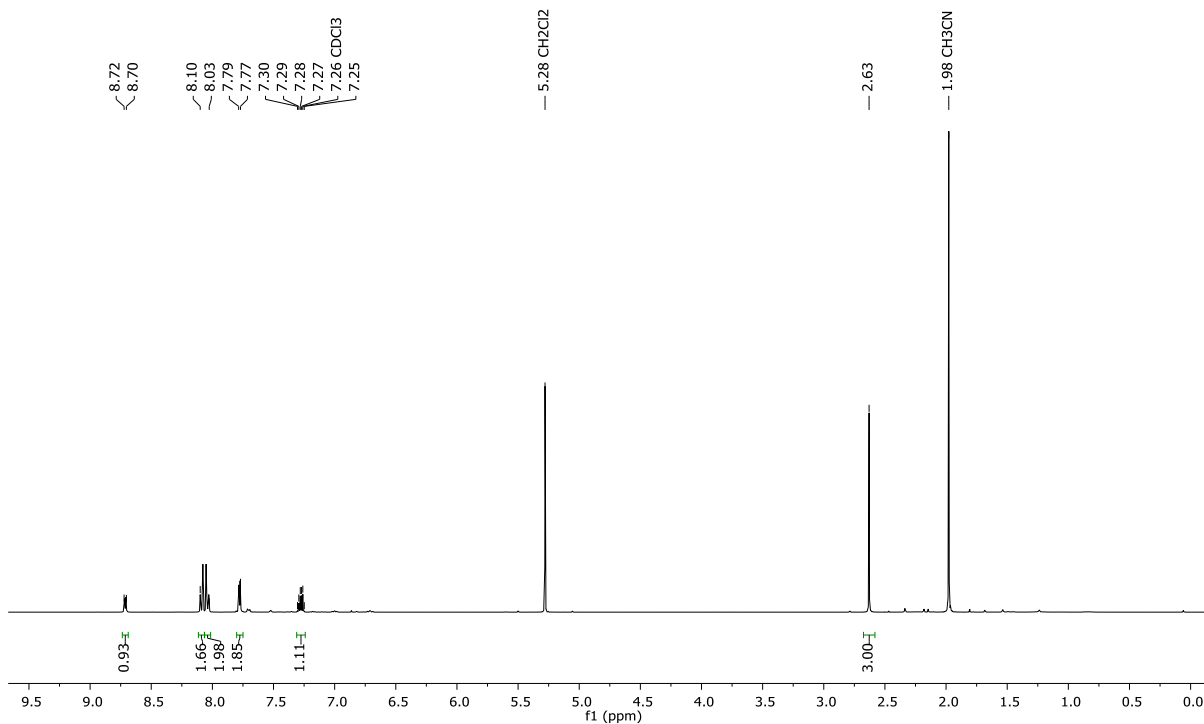

**Figure S186.**  $^1\text{H}$  NMR (400 MHz,  $\text{CDCl}_3$ ) of labelled 4-acetyl-1-(pyridin-2-yl)benzene (entry 2, Table S46)

D331130  
 Person kpb19112  
 DT-102-2  
 @proton CDCl3 {C:\NMRdata} DJN 19

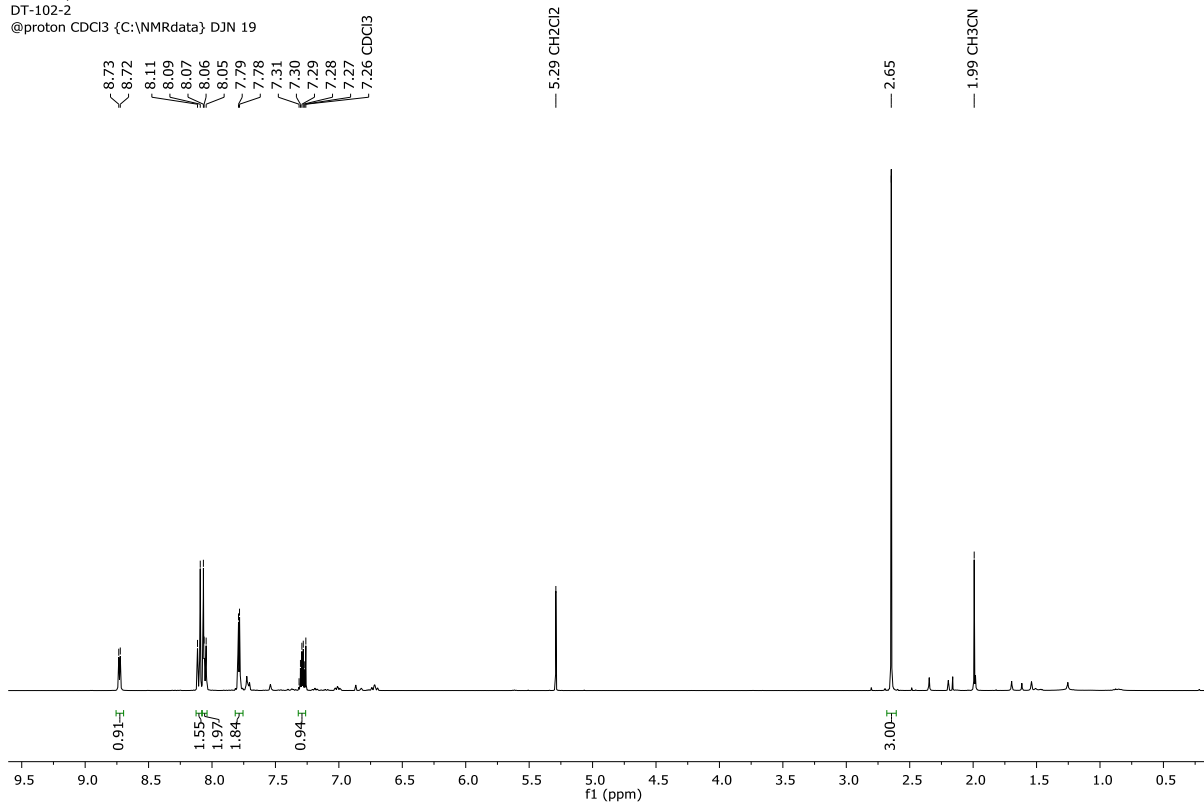

**Figure S187.**  $^1\text{H}$  NMR (400 MHz,  $\text{CDCl}_3$ ) of labelled 4-acetyl-1-(pyridin-2-yl)benzene (entry 3, Table S46)

## Labelling of 2-(4-acetyl)phenyloxazoline

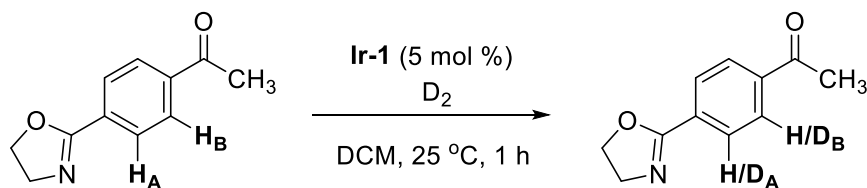

According to GP2: 18.9 mg of substrate and 8.7 mg of catalyst

*Spectral details of the reaction mixture:*

$^1\text{H}$  NMR (400 MHz,  $\text{CDCl}_3$ )  $\delta$  = 8.06 – 8.01 (m, 2H,  $\text{H}_\text{A}$ ), 8.01 – 7.96 (m, 2H,  $\text{H}_\text{B}$ ), 4.47 (t,  $J$  = 9.6 Hz, 3H,  $\text{CH}_2$ ), 4.10 (t,  $J$  = 9.6 Hz, 2H,  $\text{CH}_2$ ), 2.62 (s, 3H,  $\text{CH}_3$ ).

Deuteration expected at  $\delta$  ( $\text{H}_\text{A}$ ) = 8.06 – 8.01 ppm and  $\delta$  ( $\text{H}_\text{B}$ ) = 8.01 – 7.96 ppm.

Determined against integral at  $\delta$  = 4.47 ppm.

Note: Small signals, corresponding to the **Ir-1** catalyst, were present in the  $^1\text{H}$  NMR spectra, however they do not overlap with the substrate signals.

**Table S47.** Determination of the competition rate constant  $\kappa'$  from the labelling of 2-(4-acetyl)phenyloxazoline.

| Entry          | residual integral         |                       | residual integral         |                       | $\kappa'$    |
|----------------|---------------------------|-----------------------|---------------------------|-----------------------|--------------|
|                | (H/ $\text{D}_\text{A}$ ) | % $\text{D}_\text{A}$ | (H/ $\text{D}_\text{B}$ ) | % $\text{D}_\text{B}$ |              |
| 1              | 0.41                      | 80                    | 1.96                      | 2.0                   | 39.75        |
| 2              | 0.44                      | 78                    | 1.96                      | 2.0                   | 39.00        |
| 3              | 0.76                      | 62                    | 1.97                      | 1.5                   | 41.33        |
| <b>Average</b> |                           | <b>73</b>             |                           | <b>1.8</b>            | <b>40.03</b> |

D324683  
Person kpb19112  
DT-69-1  
@proton CDCl3 {C:\NMRdata} DJN 15

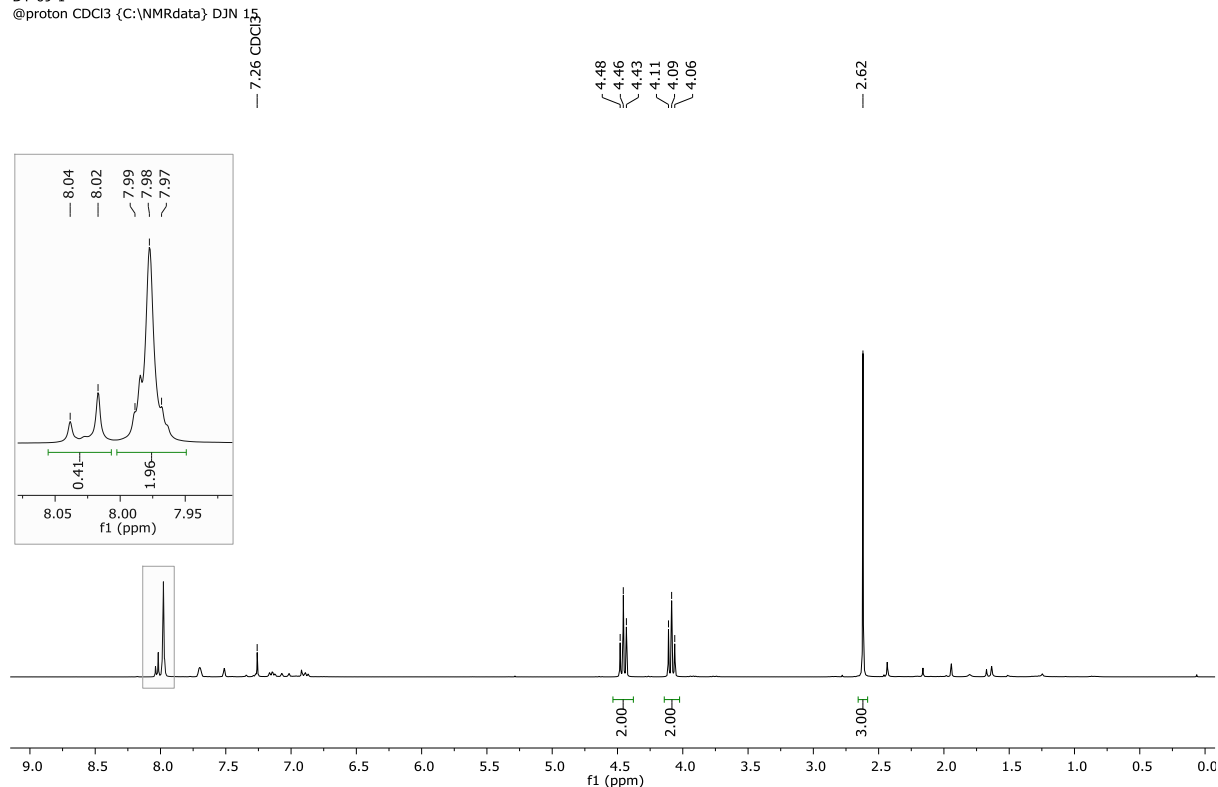

**Figure S188.**  $^1\text{H}$  NMR (400 MHz,  $\text{CDCl}_3$ ) of labelled 2-(4-acetyl)phenyloxazoline (entry 1, Table S47)

D324384  
 Person kpb19112  
 DT-68-2  
 @proton CDCl3 {C:\NMRdata} DJN 18

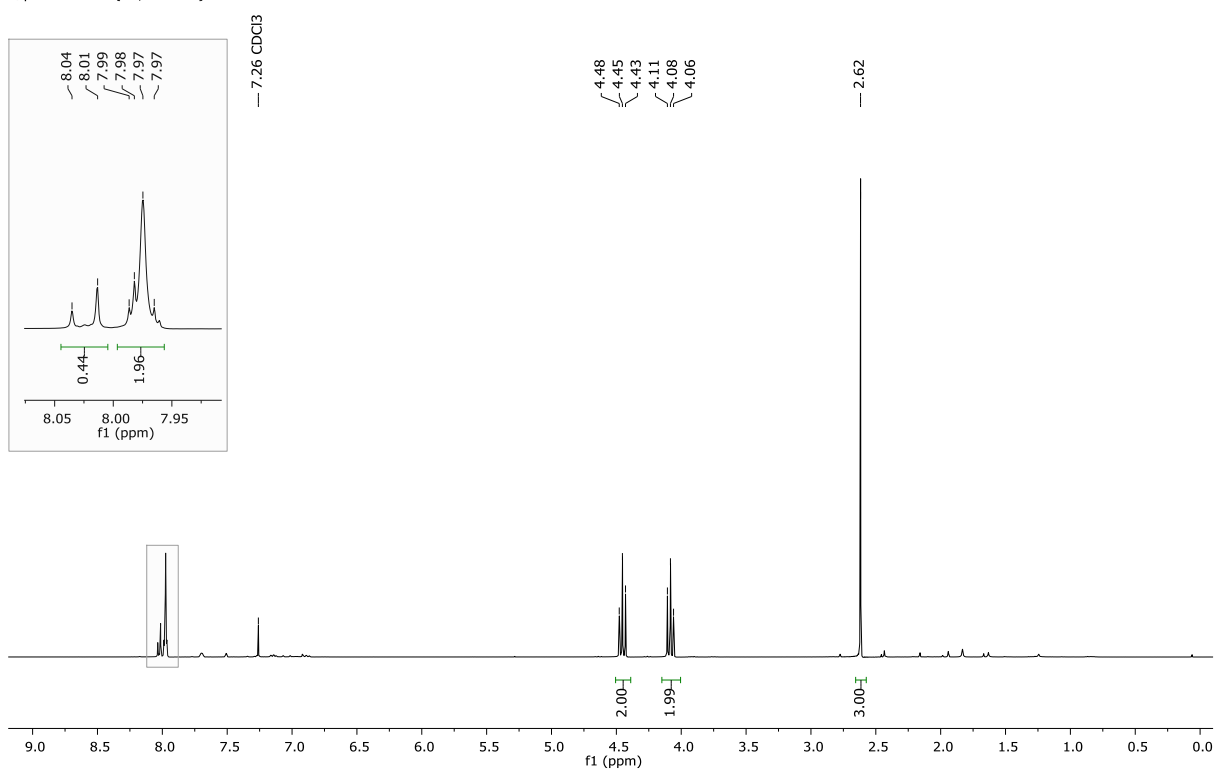

**Figure S189.** <sup>1</sup>H NMR (400 MHz, CDCl<sub>3</sub>) of labelled 2-(4-acetyl)phenyloxazoline (entry 2, Table S47)

D328159  
 Person kpb19112  
 DT-69-3  
 @proton CDCl3 {C:\NMRdata} DJN 9

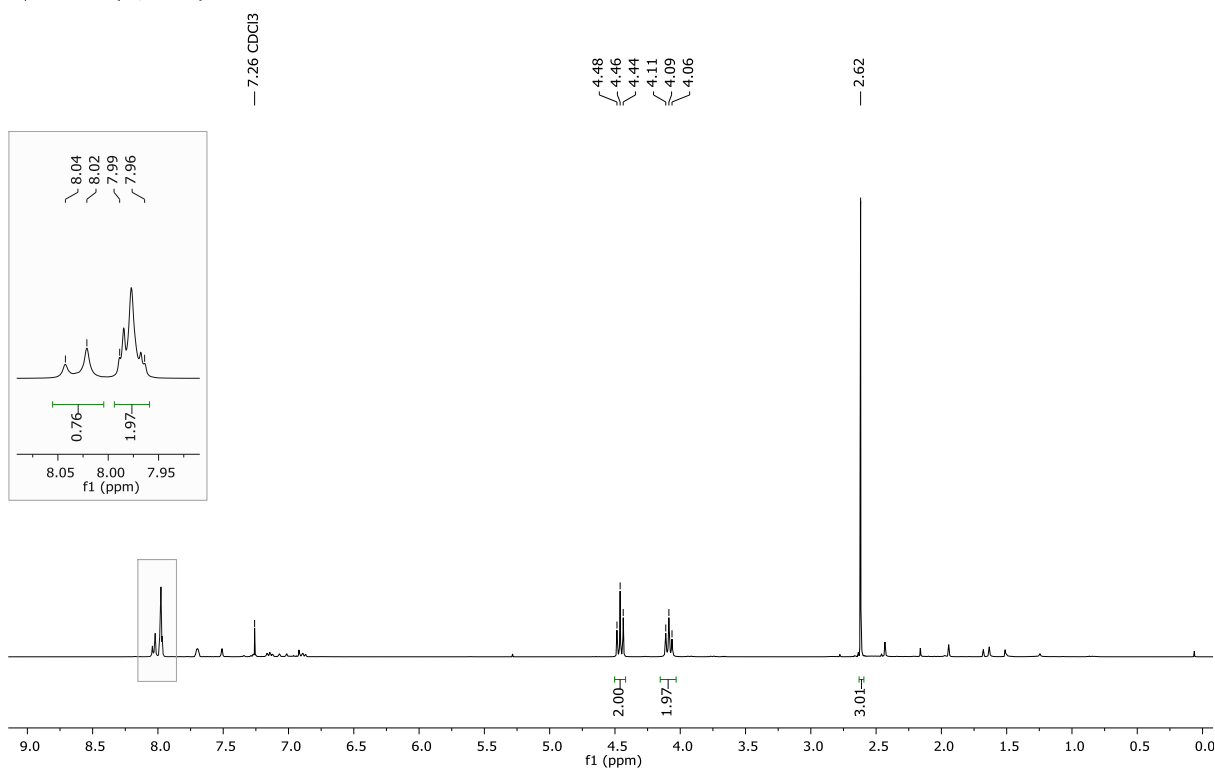

**Figure S190.** <sup>1</sup>H NMR (400 MHz, CDCl<sub>3</sub>) of labelled 2-(4-acetyl)phenyloxazoline (entry 3, Table S47)

## Labelling of 2-(4-(pyridin-2-yl)phenyl)-4,5-dihydrooxazole

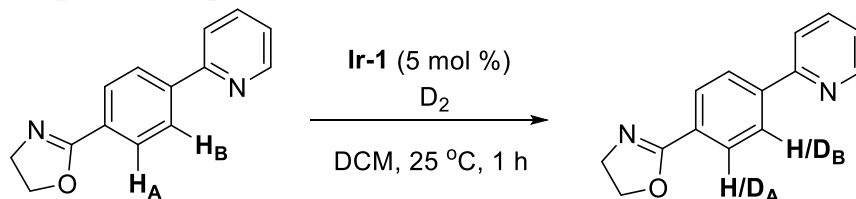

According to GP2: 22.4 mg of substrate and 8.7 mg of catalyst

*Spectral details of the reaction mixture:*

$^1\text{H}$  NMR (400 MHz,  $\text{C}_6\text{D}_6$ )  $\delta$  = 8.56 – 8.51 (m, 1H, Ar-H), 8.36 – 8.32 (m, 1H,  $\text{H}_\text{A}$ ), 8.17 – 8.11 (m, 2H,  $\text{H}_\text{B}$ ), 7.25 – 7.21 (m, 1H, Ar-H), 7.11 – 7.04 (m, 1H, Ar-H), 6.66 – 6.61 (m, 1H, Ar-H), 3.77 – 3.69 (m, 2H,  $\text{CH}_2$ ), 3.67 – 3.58 (m, 2H,  $\text{CH}_2$ ).

Deuteration expected at  $\delta$  ( $\text{H}_\text{A}$ ) = 8.36 – 8.32 ppm and  $\delta$  ( $\text{H}_\text{B}$ ) = 8.17 – 8.11 ppm.

Determined against integral at  $\delta$  = 6.66 – 6.61 ppm.

Note: Small signals, corresponding to the **Ir-1** catalyst, were present in the  $^1\text{H}$  NMR spectra, however they do not overlap with the substrate signals.

**Table S48.** Determination of the competition rate constant  $\kappa'$  from the labelling of 2-(4-(pyridin-2-yl)phenyl)-4,5-dihydrooxazole.

| Entry          | residual integral<br>( $\text{H}/\text{D}_\text{A}$ ) | % $\text{D}_\text{A}$ | residual integral<br>( $\text{H}/\text{D}_\text{B}$ ) | % $\text{D}_\text{B}$ | $\kappa'$   |
|----------------|-------------------------------------------------------|-----------------------|-------------------------------------------------------|-----------------------|-------------|
| 1              | 0.80                                                  | 60                    | 1.45                                                  | 28                    | 2.18        |
| 2              | 0.42                                                  | 79                    | 1.57                                                  | 22                    | 3.67        |
| 3              | 0.48                                                  | 76                    | 1.62                                                  | 19                    | 4.00        |
| <b>Average</b> |                                                       | <b>72</b>             |                                                       | <b>23</b>             | <b>3.29</b> |

D328680

Person kpb19112

DT-88-1

@proton C6D6 {C:\NMRdata} DJN 4

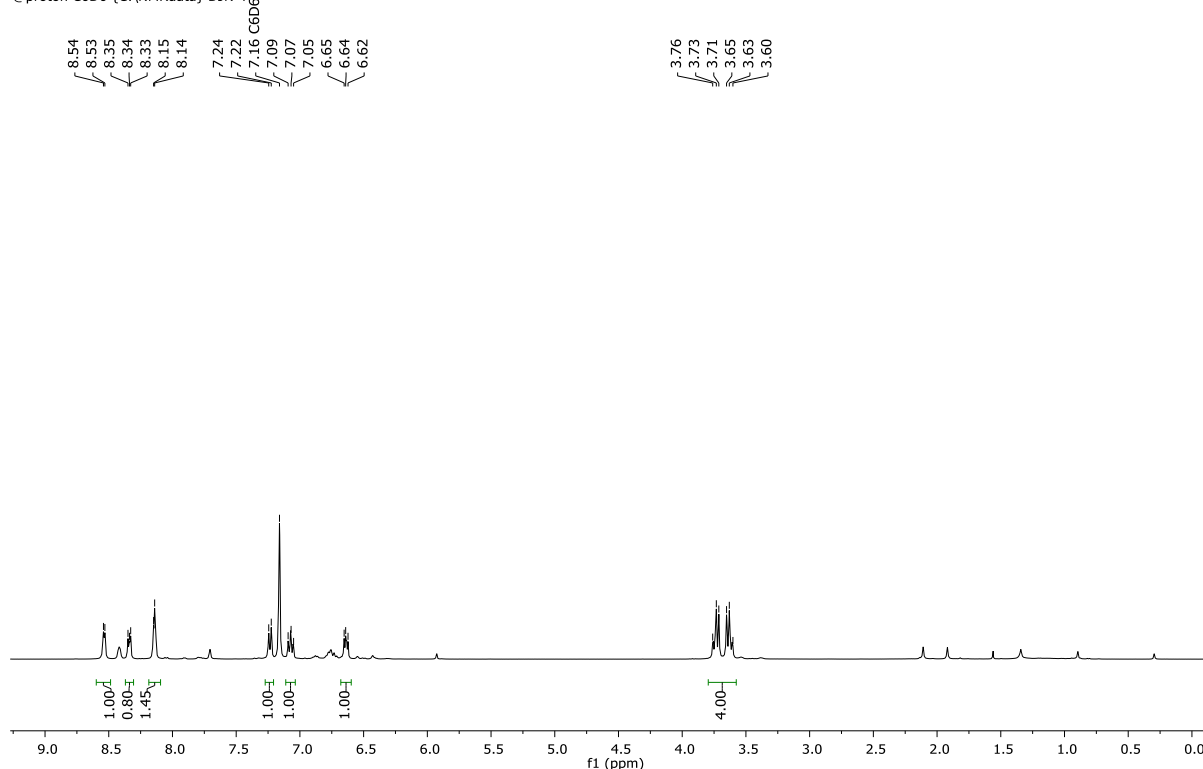

**Figure S191.**  $^1\text{H}$  NMR (400 MHz,  $\text{C}_6\text{D}_6$ ) of labelled 2-(4-(pyridin-2-yl)phenyl)-4,5-dihydrooxazole (entry 1, Table S48)

D328681  
 Person kpb19112  
 DT-88-2  
 @proton C6D6 {C:\NMRdata} DJN 5

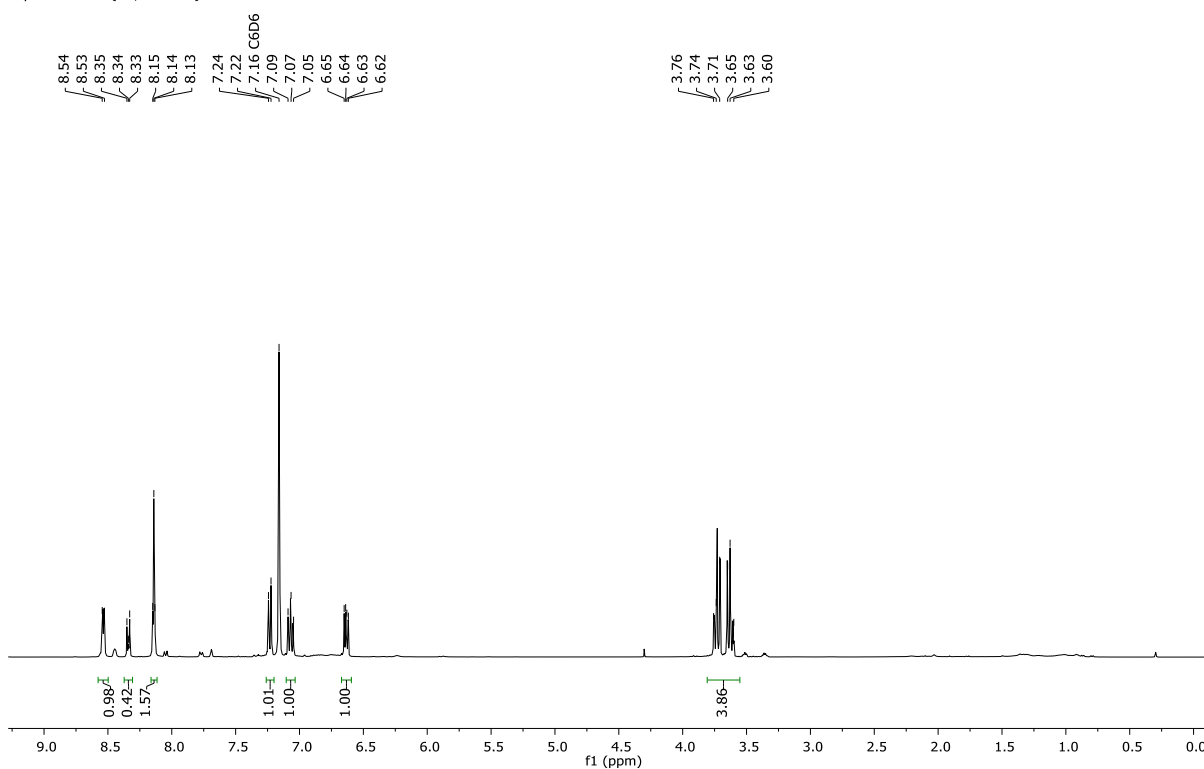

**Figure S192.**  $^1\text{H}$  NMR (400 MHz,  $\text{C}_6\text{D}_6$ ) of labelled 2-(4-(pyridin-2-yl)phenyl)-4,5-dihydrooxazole (entry 2, Table S48)

D328682  
 Person kpb19112  
 DT-88-3  
 @proton C6D6 {C:\NMRdata} DJN 6

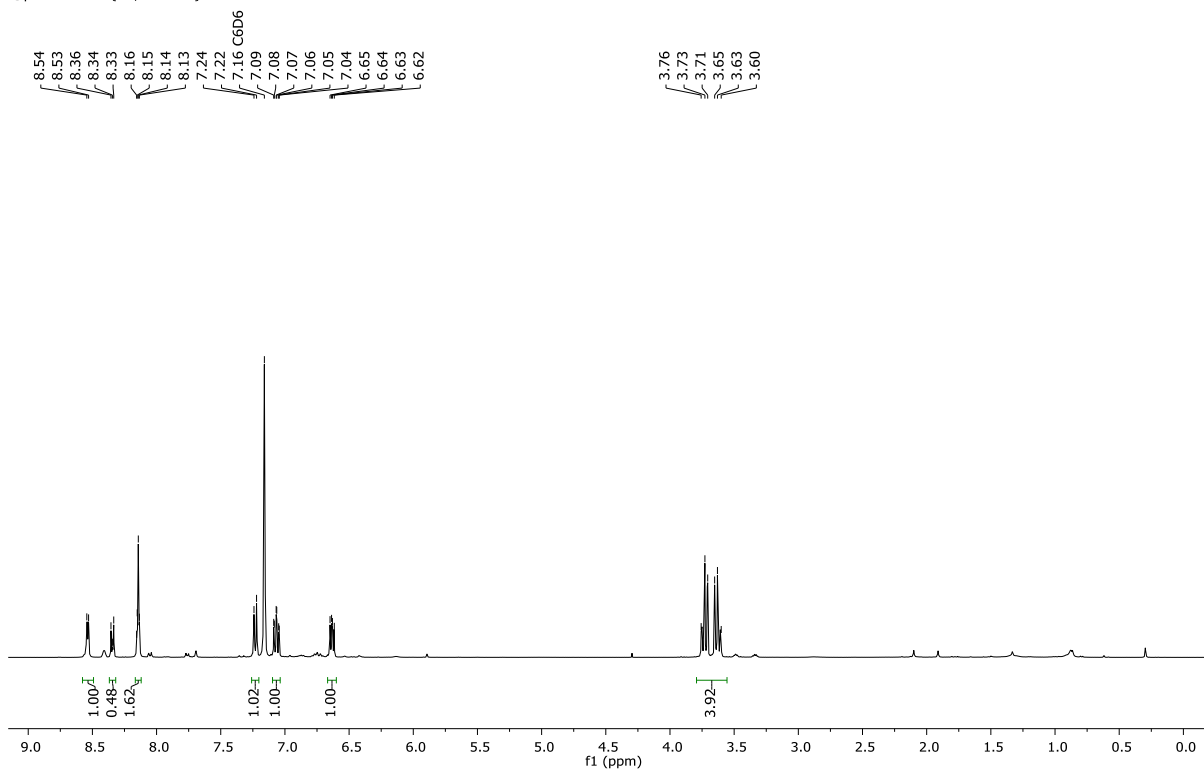

**Figure S193.**  $^1\text{H}$  NMR (400 MHz,  $\text{C}_6\text{D}_6$ ) of labelled 2-(4-(pyridin-2-yl)phenyl)-4,5-dihydrooxazole (entry 3, Table S48)

## 4.2. Competition Experiments with (COD)Ir(IMes)Cl (Ir-2)

### Labelling of 4-acetyl-1-(pyridin-2-yl)benzene

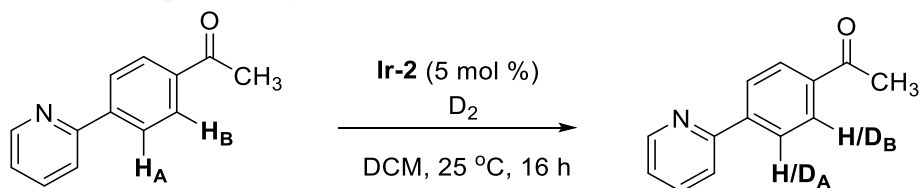

According to GP2: 19.7 mg of substrate and 3.2 mg of catalyst

*Spectral details of the reaction mixture:*

$^1\text{H}$  NMR (400 MHz,  $\text{CDCl}_3$ )  $\delta$  = 8.76 – 8.72 (m, 1H), 8.13 – 8.09 (m, 2H,  $\text{H}_\text{A}$ ), 8.09 – 8.04 (m, 2H,  $\text{H}_\text{B}$ ), 7.82 – 7.78 (m, 2H, Ar), 7.33 – 7.27 (m, 1H, Ar), 2.65 (s, 3H,  $\text{CH}_3$ ).

Deuteration expected at  $\delta$  ( $\text{H}_\text{A}$ ) = 8.13 – 8.09 ppm and  $\delta$  ( $\text{H}_\text{B}$ ) = 8.09 – 8.04 ppm.

Determined against integral at  $\delta$  = 2.65 ppm.

**Table S49.** Determination of the competition rate constant  $\kappa'$  from the labelling of 4-acetyl-1-(pyridin-2-yl)benzene.

| Entry          | residual integral<br>( $\text{H}/\text{D}_\text{A}$ ) | % $\text{D}_\text{A}$ | residual integral<br>( $\text{H}/\text{D}_\text{B}$ ) | % $\text{D}_\text{B}$ | $\kappa'$    |
|----------------|-------------------------------------------------------|-----------------------|-------------------------------------------------------|-----------------------|--------------|
| 1              | 1.32                                                  | 34                    | 1.96                                                  | 2                     | 17.00        |
| 2              | 1.52                                                  | 24                    | 1.97                                                  | 2                     | 16.00        |
| 3              | 1.21                                                  | 40                    | 1.95                                                  | 3                     | 15.80        |
| <b>Average</b> |                                                       | <b>33</b>             |                                                       | <b>2</b>              | <b>16.27</b> |

D324684  
Person kpb19112  
DT-71-1  
@proton  $\text{CDCl}_3$  {C:\NMRdata} DJN 16

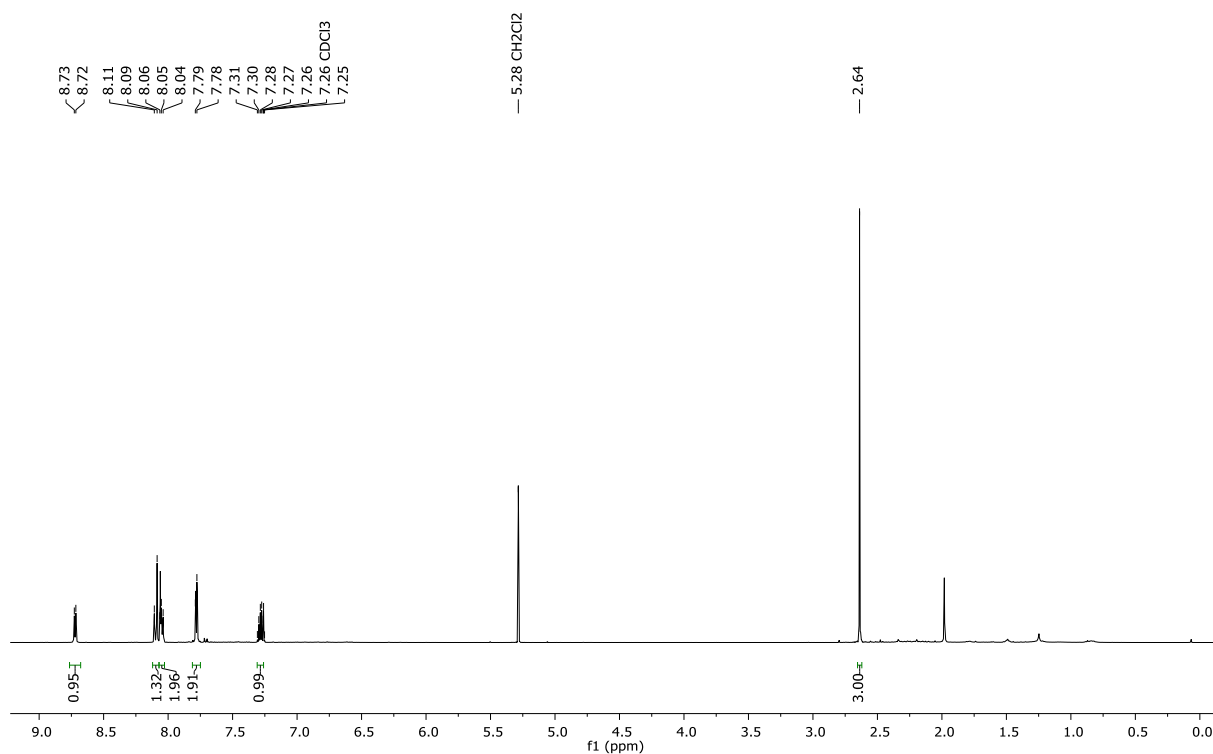

**Figure S194.**  $^1\text{H}$  NMR (400 MHz,  $\text{CDCl}_3$ ) of labelled 4-acetyl-1-(pyridin-2-yl)benzene (entry 1, Table S49).

D324698  
 Person kpb19112  
 DT-71-2  
 @proton CDCl3 {C:\NMRdata} DJN 30

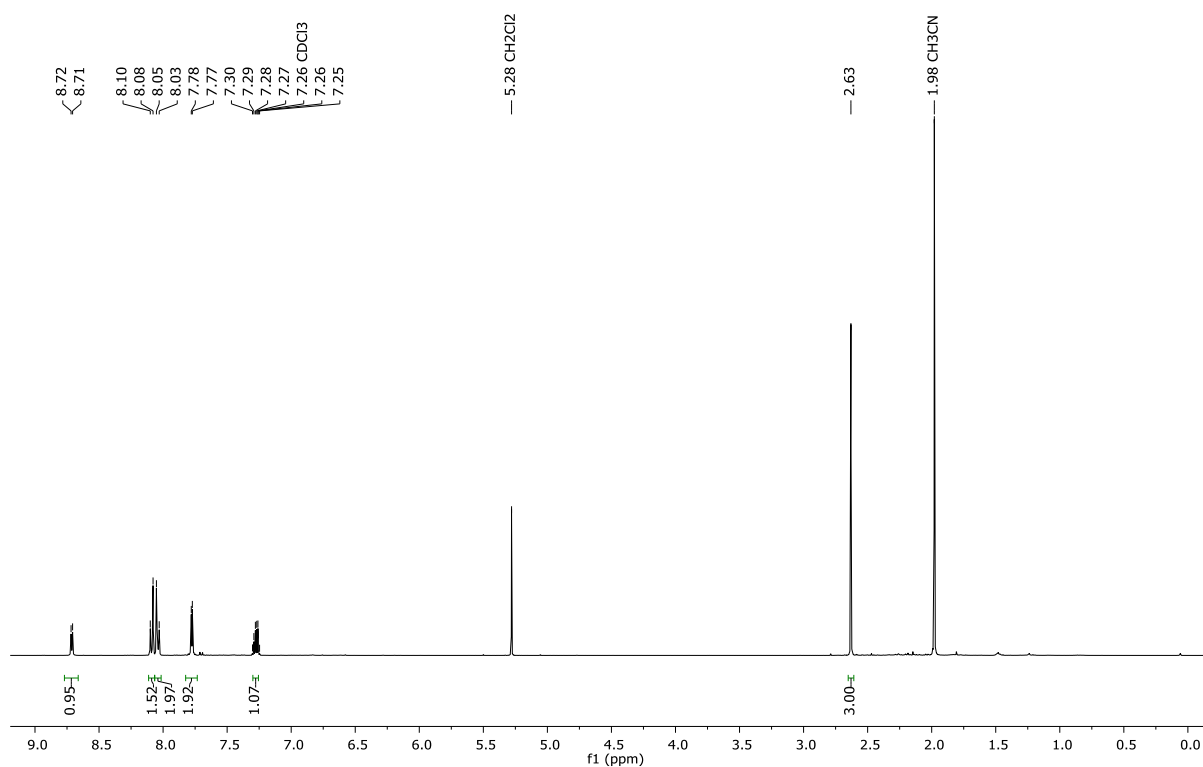

**Figure S195.**  $^1\text{H}$  NMR (400 MHz,  $\text{CDCl}_3$ ) of labelled 4-acetyl-1-(pyridin-2-yl)benzene (entry 2, Table S49).

D330953  
 Person kpb19112  
 DT-100-2  
 @proton CDCl3 {C:\NMRdata} DJN 57

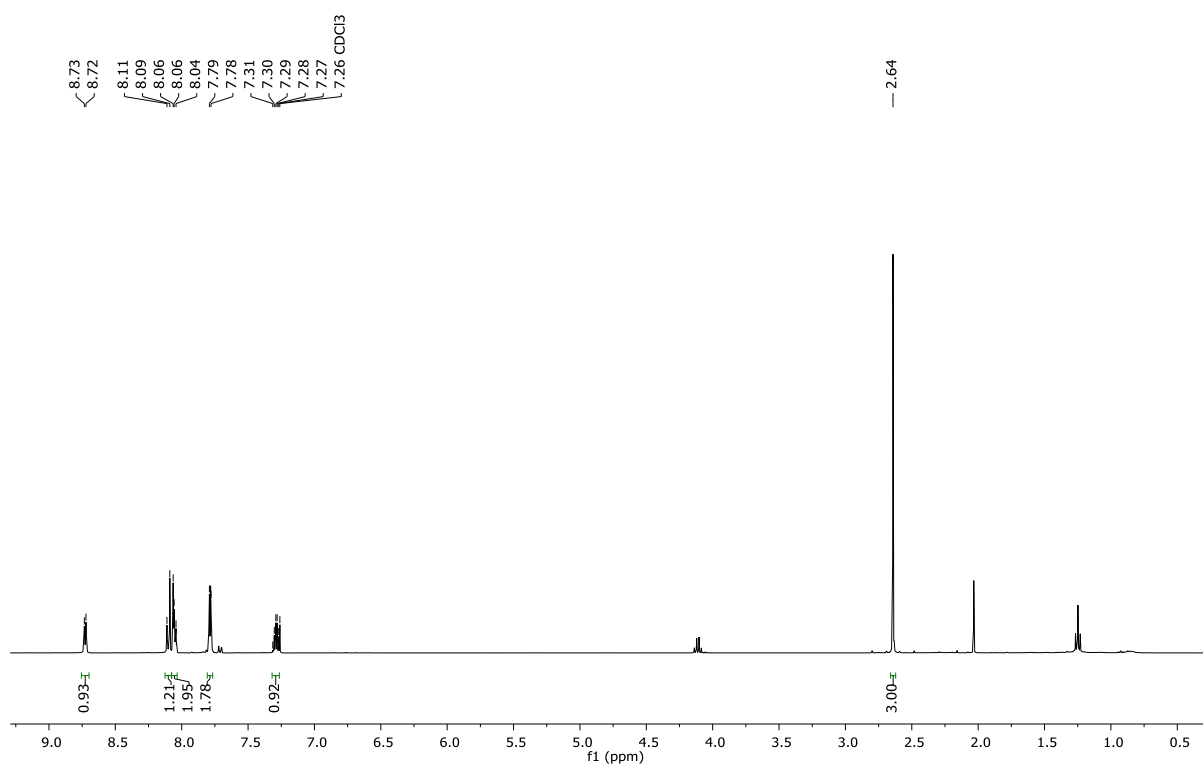

**Figure S196.**  $^1\text{H}$  NMR (400 MHz,  $\text{CDCl}_3$ ) of labelled 4-acetyl-1-(pyridin-2-yl)benzene (entry 3, Table S49).

## Labelling of 2-(4-acetyl)phenyloxazoline

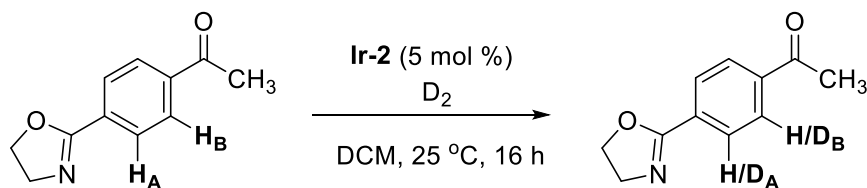

According to GP2: 18.9 mg of substrate and 3.2 mg of catalyst

*Spectral details of the reaction mixture:*

$^1\text{H}$  NMR (400 MHz,  $\text{CDCl}_3$ )  $\delta$  = 8.06 – 8.01 (m, 2H,  $\text{H}_\text{A}$ ), 8.01 – 7.96 (m, 2H,  $\text{H}_\text{B}$ ), 4.47 (t,  $J$  = 9.6 Hz, 3H,  $\text{CH}_2$ ), 4.10 (t,  $J$  = 9.6 Hz, 2H,  $\text{CH}_2$ ), 2.62 (s, 3H,  $\text{CH}_3$ ).

Deuteration expected at  $\delta$  ( $\text{H}_\text{A}$ ) = 8.06 – 8.01 ppm and  $\delta$  ( $\text{H}_\text{B}$ ) = 8.01 – 7.96 ppm.

Determined against integral at  $\delta$  = 4.47 ppm.

**Table S50.** Determination of the competition rate constant  $\kappa'$  from the labelling of 2-(4-acetyl)phenyloxazoline.

| Entry          | residual integral<br>( $\text{H}/\text{D}_\text{A}$ ) | % $\text{D}_\text{A}$ | residual integral<br>( $\text{H}/\text{D}_\text{B}$ ) | % $\text{D}_\text{B}$ | $\kappa'$    |
|----------------|-------------------------------------------------------|-----------------------|-------------------------------------------------------|-----------------------|--------------|
| 1              | 1.41                                                  | 30                    | 1.93                                                  | 4                     | 8.43         |
| 2              | 1.27                                                  | 37                    | 1.93                                                  | 4                     | 10.43        |
| 3              | 0.48                                                  | 76                    | 1.88                                                  | 6                     | 12.67        |
| <b>Average</b> |                                                       | <b>47</b>             |                                                       | <b>4</b>              | <b>10.51</b> |

D324699  
Person kpb19112  
DT-72-1  
@proton  $\text{CDCl}_3$  {C:\NMRdata} DJN 31

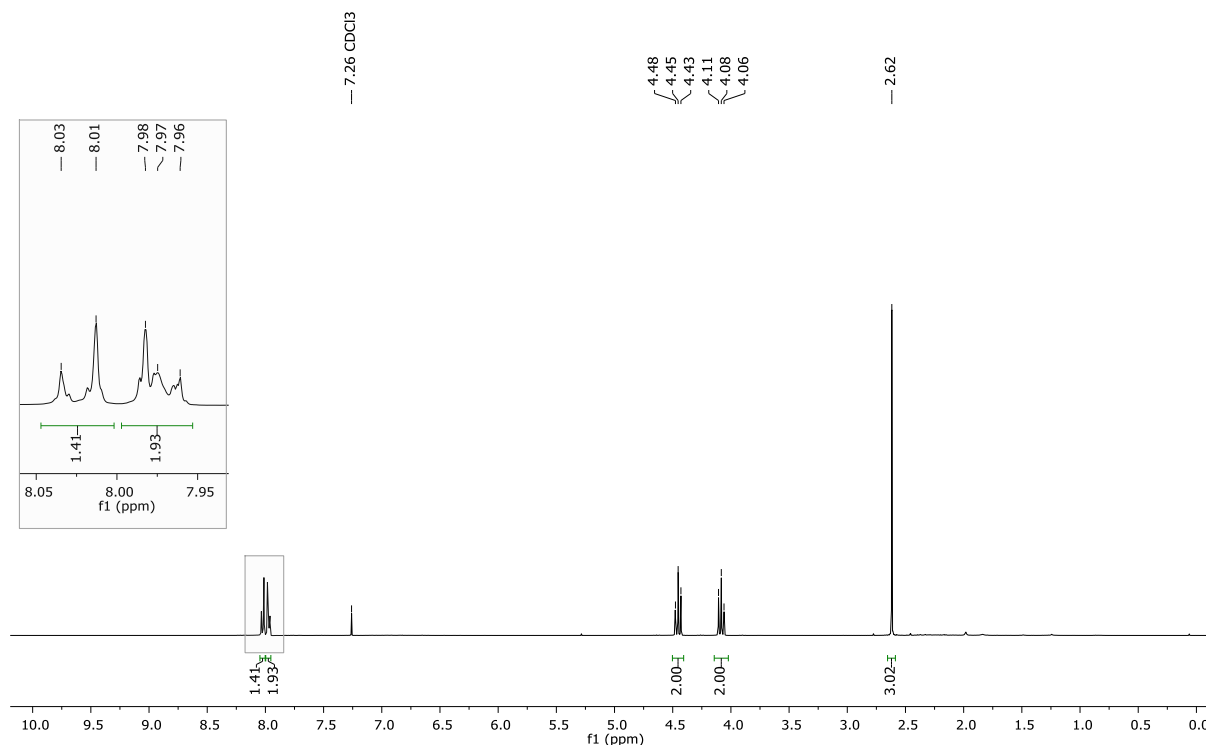

**Figure S197.**  $^1\text{H}$  NMR (400 MHz,  $\text{CDCl}_3$ ) of labelled 2-(4-acetyl)phenyloxazoline (entry 1, Table S50)



D324700  
 Person kpb19112  
 DT-72-2  
 @proton CDCl3 {C:\NMRdata} DJN 32

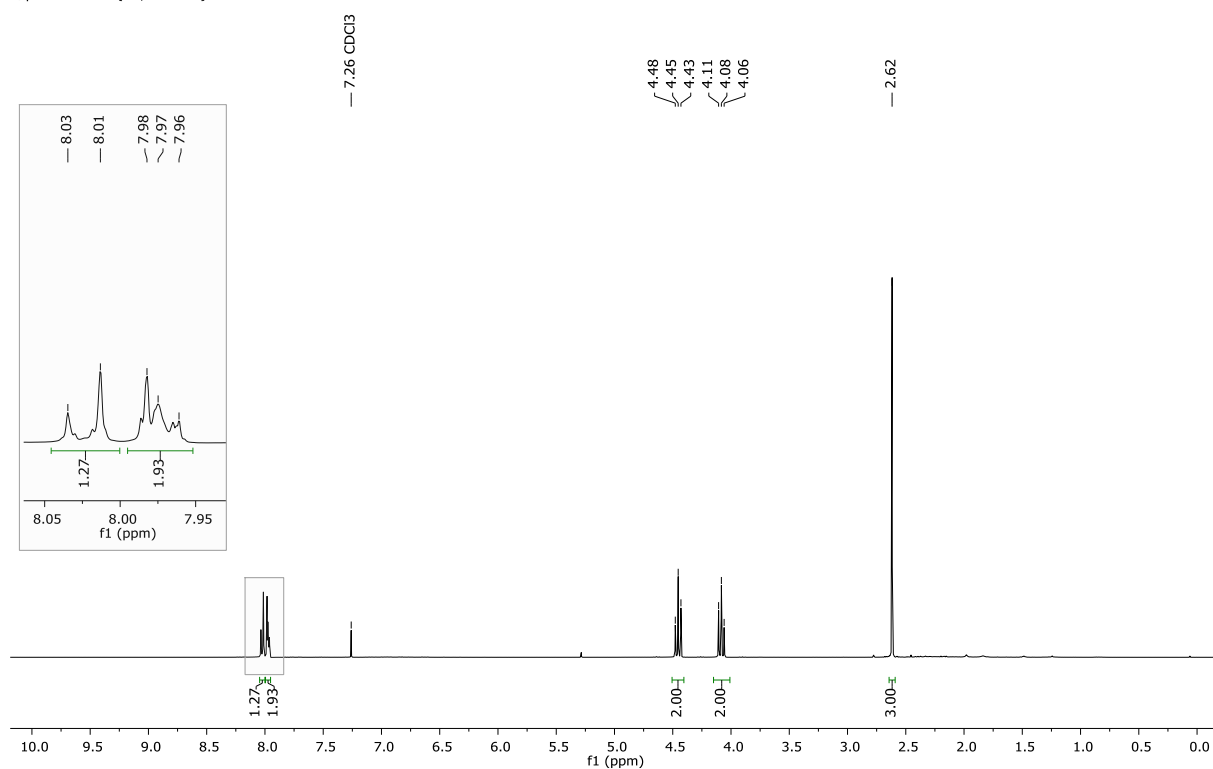

**Figure S198.** <sup>1</sup>H NMR (400 MHz, CDCl<sub>3</sub>) of labelled 2-(4-acetyl)phenyloxazoline (entry 2, Table S50)

D330759  
 Person kpb19112  
 DT-72-3  
 @proton CDCl3 {C:\NMRdata} DJN 15

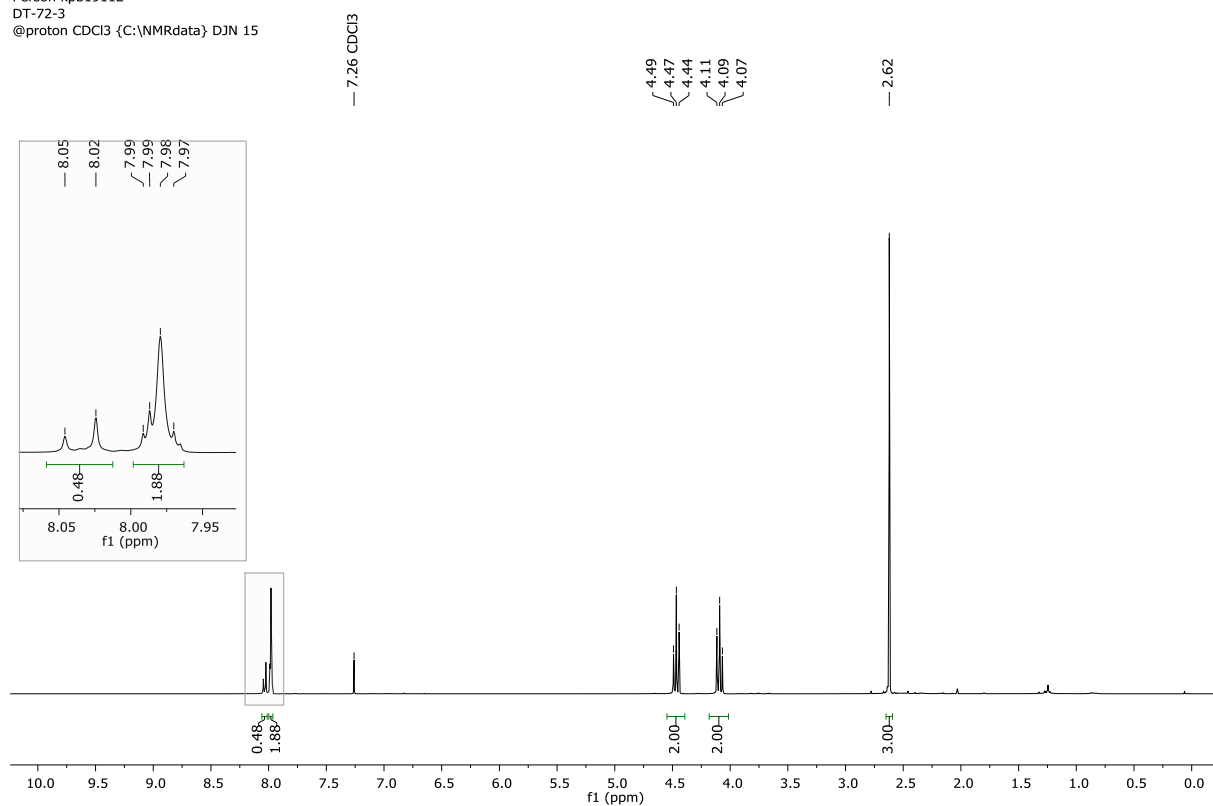

**Figure S199.** <sup>1</sup>H NMR (400 MHz, CDCl<sub>3</sub>) of labelled 2-(4-acetyl)phenyloxazoline (entry 3, Table S50)

### Labelling of 2-(4-(pyridin-2-yl)phenyl)-4,5-dihydrooxazole

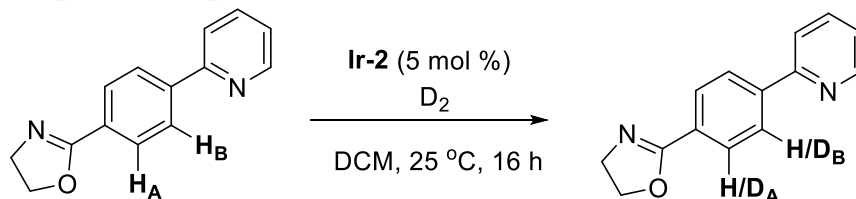

According to GP2: 22.4 mg of substrate and 3.2 mg of catalyst

*Spectral details of the reaction mixture:*

$^1\text{H}$  NMR (400 MHz,  $\text{C}_6\text{D}_6$ )  $\delta$  = 8.56 – 8.51 (m, 1H, Ar-H), 8.36 – 8.32 (m, 1H,  $\text{H}_\text{A}$ ), 8.17 – 8.11 (m, 2H,  $\text{H}_\text{B}$ ), 7.25 – 7.21 (m, 1H, Ar-H), 7.11 – 7.04 (m, 1H, Ar-H), 6.66 – 6.61 (m, 1H, Ar-H), 3.77 – 3.58 (m, 4H,  $2\times\text{CH}_2$ ).

Deuteration expected at  $\delta$  ( $\text{H}_\text{A}$ ) = 8.36 – 8.32 ppm and  $\delta$  ( $\text{H}_\text{B}$ ) = 8.17 – 8.11 ppm.

Determined against integral at  $\delta$  = 6.66 – 6.61 ppm.

**Table S51.** Determination of the competition rate constant  $\kappa'$  from the labelling of 2-(4-(pyridin-2-yl)phenyl)-4,5-dihydrooxazole.

| Entry          | residual integral<br>( $\text{H}/\text{D}_\text{A}$ ) | % $\text{D}_\text{A}$ | residual integral<br>( $\text{H}/\text{D}_\text{B}$ ) | % $\text{D}_\text{B}$ | $\kappa'$   |
|----------------|-------------------------------------------------------|-----------------------|-------------------------------------------------------|-----------------------|-------------|
| 1              | 1.53                                                  | 24                    | 1.74                                                  | 13                    | 1.81        |
| 2              | 1.59                                                  | 21                    | 1.79                                                  | 11                    | 1.95        |
| 3              | 1.53                                                  | 24                    | 1.79                                                  | 11                    | 2.24        |
| <b>Average</b> |                                                       | <b>23</b>             |                                                       | <b>11</b>             | <b>2.00</b> |

D328065  
Person kpb19112  
DT-87-1  
@proton C6D6 {C:\NMRdata} DJN 17

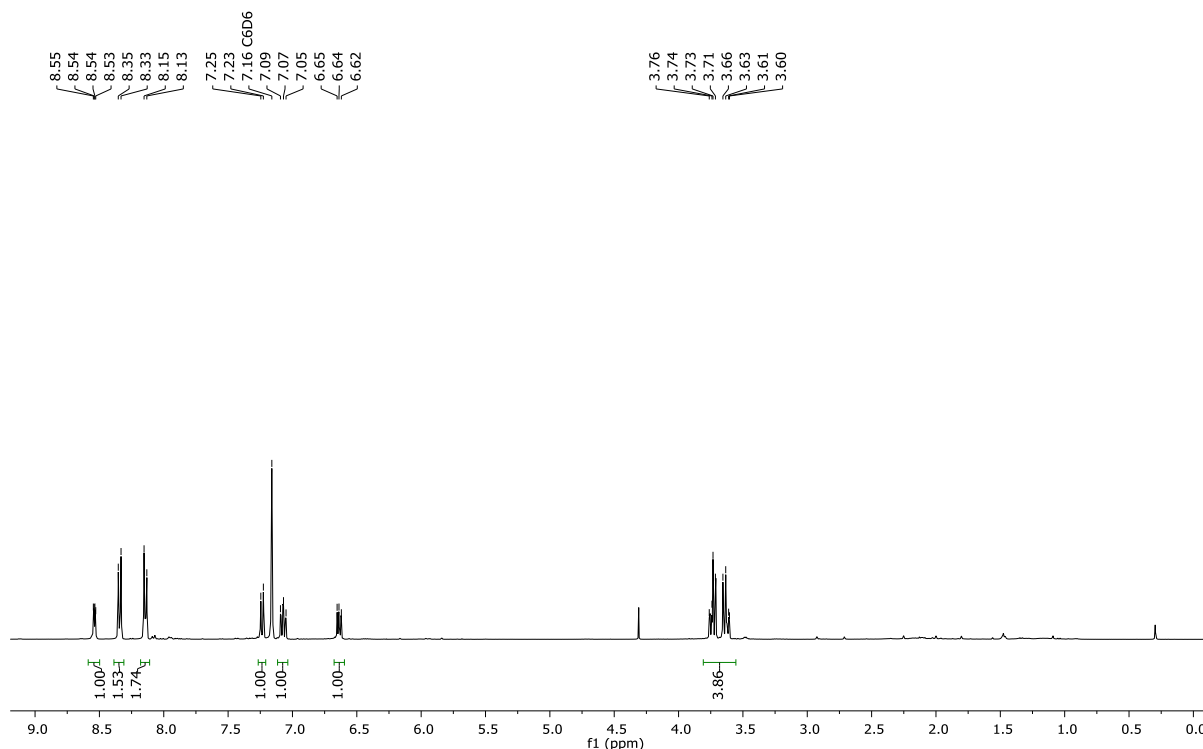

**Figure S200.**  $^1\text{H}$  NMR (400 MHz,  $\text{C}_6\text{D}_6$ ) of labelled 2-(4-(pyridin-2-yl)phenyl)-4,5-dihydrooxazole (entry 1, Table S51)

D328066  
 Person kpb19112  
 DT-87-2  
 @proton C6D6 {C:\NMRdata} DJN 18

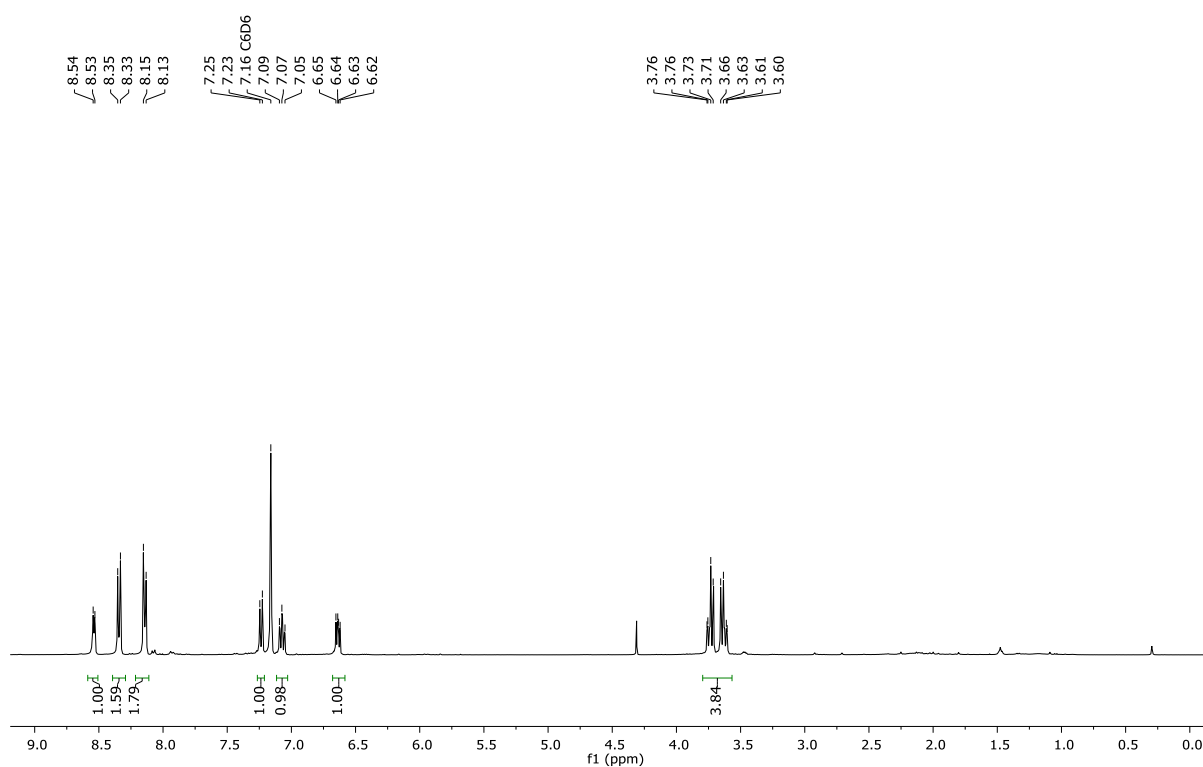

**Figure S201.**  $^1\text{H}$  NMR (400 MHz,  $\text{C}_6\text{D}_6$ ) of labelled 2-(4-(pyridin-2-yl)phenyl)-4,5-dihydrooxazole (entry 2, Table S51)

D330760  
 Person kpb19112  
 DT-87-3  
 @proton C6D6 {C:\NMRdata} DJN 16

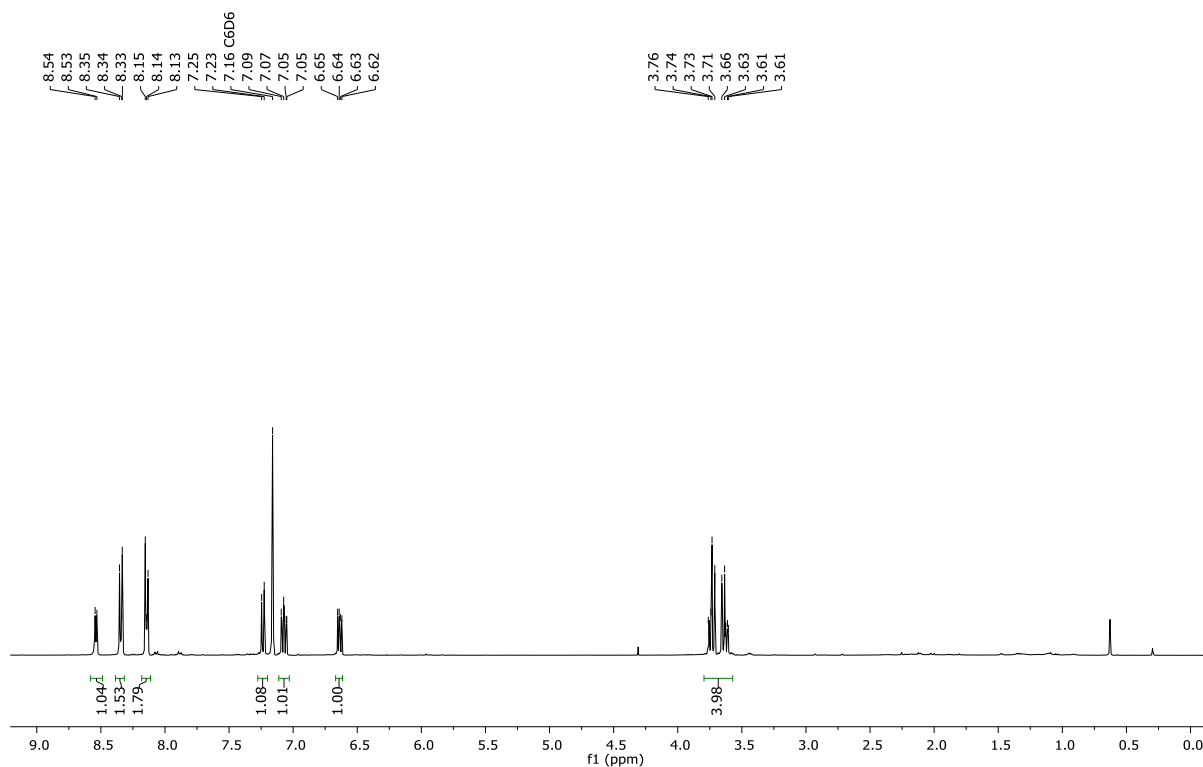

**Figure S202.**  $^1\text{H}$  NMR (400 MHz,  $\text{C}_6\text{D}_6$ ) of labelled 2-(4-(pyridin-2-yl)phenyl)-4,5-dihydrooxazole (entry 3, Table S51)

## 5. References.

- [S1] A. Beillard, X. Bantreil, T.-X. Métro, J. Martinez and F. Lamaty, *Dalton Trans.*, 2016, **45**, 17859-17866.
- [S2] M. Trose, F. Lazreg, M. Lesieur and C. S. J. Cazin *Green Chem.*, 2015, **17**, 3090-3092.
- [S3] M. Debdab, F. Mongin and J. P. Bazureau, *Synthesis*, 2006, **23**, 4046-4052.
- [S4] M. Trose, F. Lazreg, M. Lesieur and C. S. J. Cazin, *J. Org. Chem.* 2015, **80** (20), 9910-9914.
- [S5] N. A. Yakelis and R. G. Bergman, *Organometallics*, 2005, **24**, 3579–3581.
- [S6] A. J. Martínez-Martínez and A. S. Weller, *Dalton Trans.*, 2019, **48**, 3551-3554.
- [S7] A. R. Cochrane, S. Irvine, W. J. Kerr, M. Reid, S. Andersson and G. N. Nilsson, *J. Label. Compd. Radiopharm.*, 2013, **56**, 451-454.
- [S8] A. R. Kennedy, W. J. Kerr, R. Moir and M. Reid, *Org. Biomol. Chem.*, 2014, **12**, 7927-7931.
- [S9] G. R. Fulmer, A. J. M. Miller, N. H. Sherden, H. E. Gottlieb, A. Nudelman, B. M. Stoltz, J. E. Bercaw and K. I. Goldberg, *Organometallics*, 2010, **29**, 2176-2179.
- [S10] J. H. Kim, R. T. Mertens, A. Agarwal, S. Parkin, G. Berger and S. G. Awuah, *Dalton Trans.*, 2019, **48**, 6273-6282.
- [S11] M. R. Kumar, K. Park and S. Lee, *Adv. Synth. Catal.*, 2010, **352**, 3255-3266.
- [S12] A. S. B. Prasad, T. M. Stevenson, J. R. Citineni, V. Nyzam and P. Knochel, *Tetrahedron* 1997, **53**, 7237-7254.
- [S13] C. M. Zinser, K. G. Warren, R. E. Meadows, F. Nahra, A. M. Al-Majid, A. Barakat, M. S. Islam, S. P. Nolan and C. S. J. Cazin, *Green Chem.*, 2018, **20**, 3246-3252
- [S14] J. B. Badiang and J. Aubé, *J. Org. Chem.*, 1996, **61** (7), 2484-2487.
- [S15] W.-C. Chen, Y.-C. Hsu, W.-C. Shih, C.-Y. Lee, W.-H. Chuang, Y.-F. Tsai, P. P.-Y. Chen and T.-G. Ong, *Chem. Commun.*, 2012, **48**, 6702-6704.

## 6. Copies of NMR Spectra

### 6.1. $^1\text{H}$ and $^{13}\text{C}\{^1\text{H}\}$ NMR of synthesised substrates

*N,N'*-dimesitylethanedimine

$^1\text{H}$  NMR (400 MHz,  $\text{CDCl}_3$ )

D317246.1.fid  
Person kpb19112  
DT-1  
@proton  $\text{CDCl}_3$  {C:\NMRdata} DJN 49

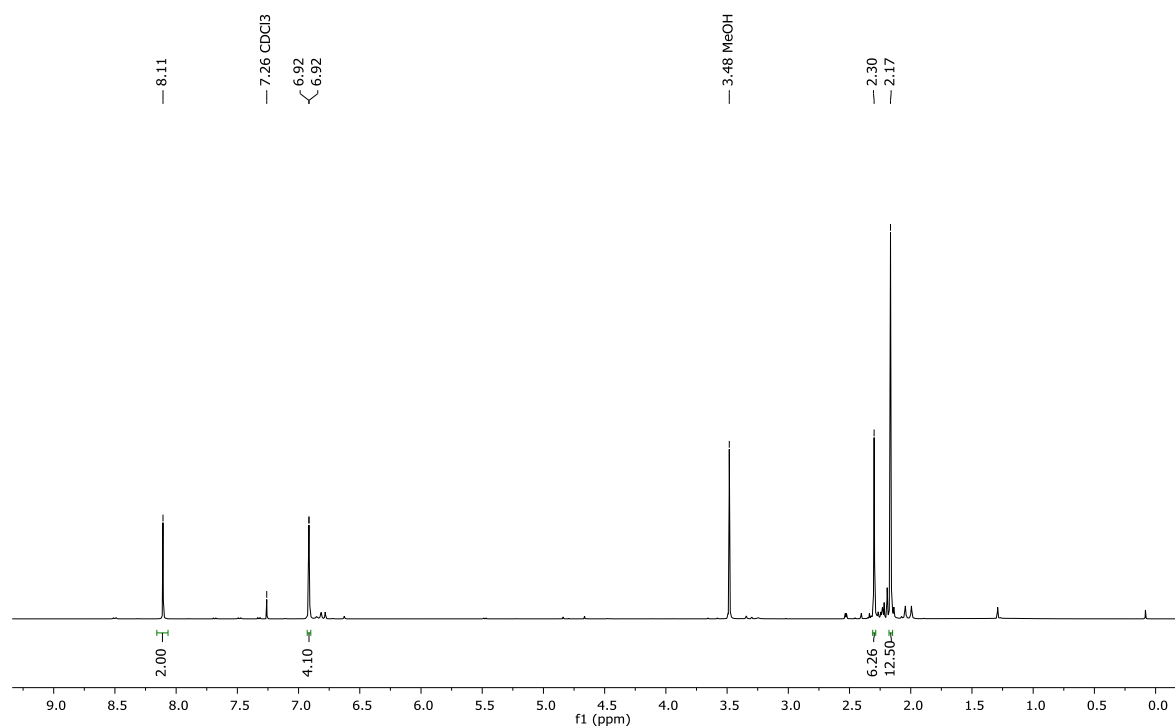

$^{13}\text{C}\{^1\text{H}\}$  NMR (101 MHz,  $\text{CDCl}_3$ )

D317246.2.fid  
Person kpb19112  
DT-1  
13C\_@  $\text{CDCl}_3$  {C:\NMRdata} DJN 49

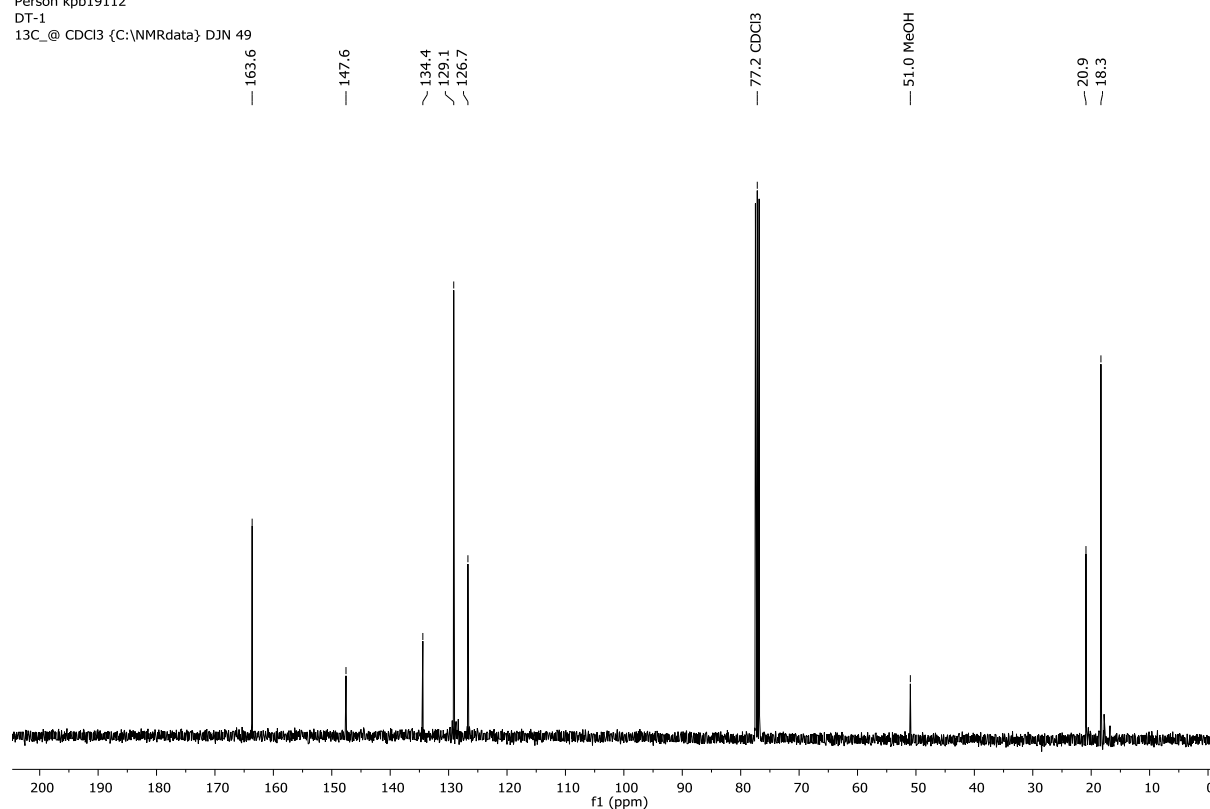

*1,3-Bis-(2,4,6-trimethylphenyl)imidazolium chloride (IMes·HCl)*

**<sup>1</sup>H NMR** (400 MHz, CDCl<sub>3</sub>)

D317489  
Person kpb19112  
DT-2-2-IMesHCl  
@proton CDCl3 {C:\NMRdata} DJN 14

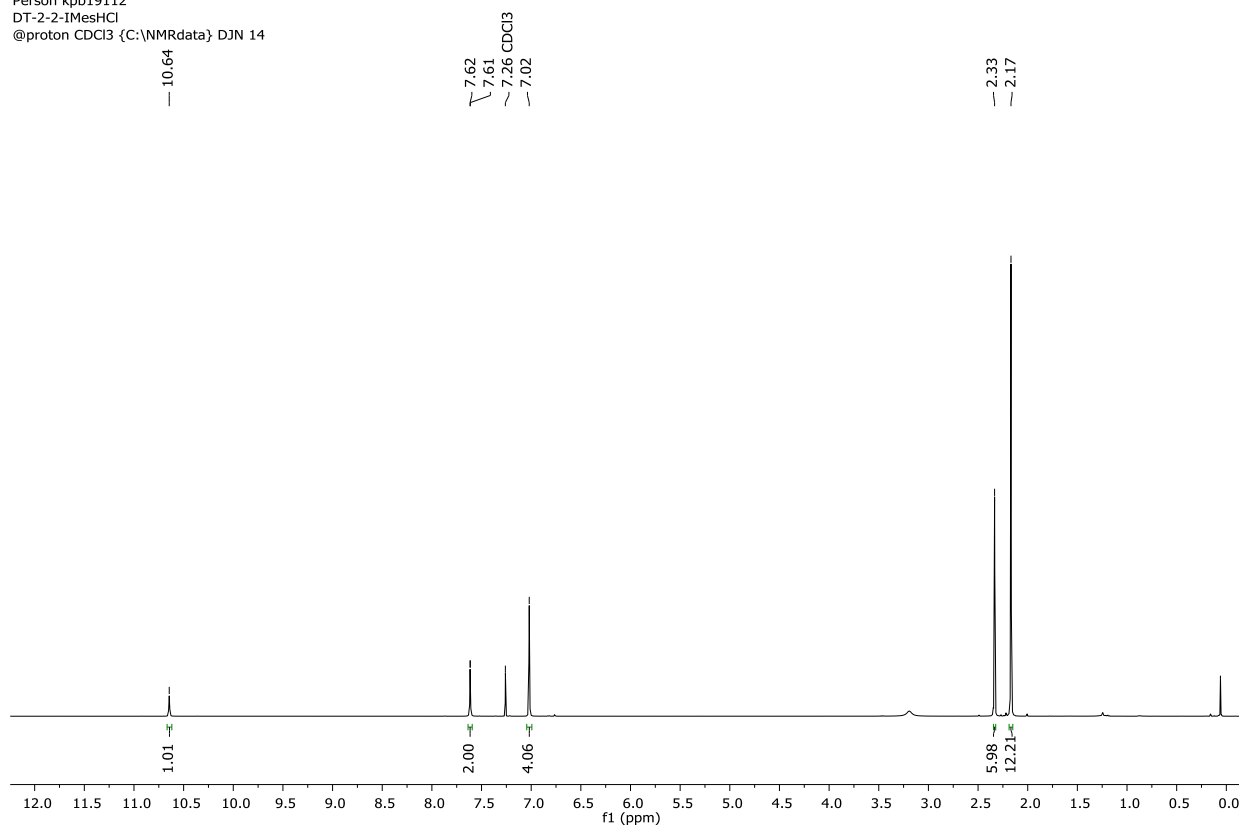

**<sup>13</sup>C{<sup>1</sup>H} NMR** (101 MHz, CDCl<sub>3</sub>)

D329992  
Person kpb19112  
IMes-Cl  
13C\_@ CDCl3 {C:\NMRdata} DJN 92

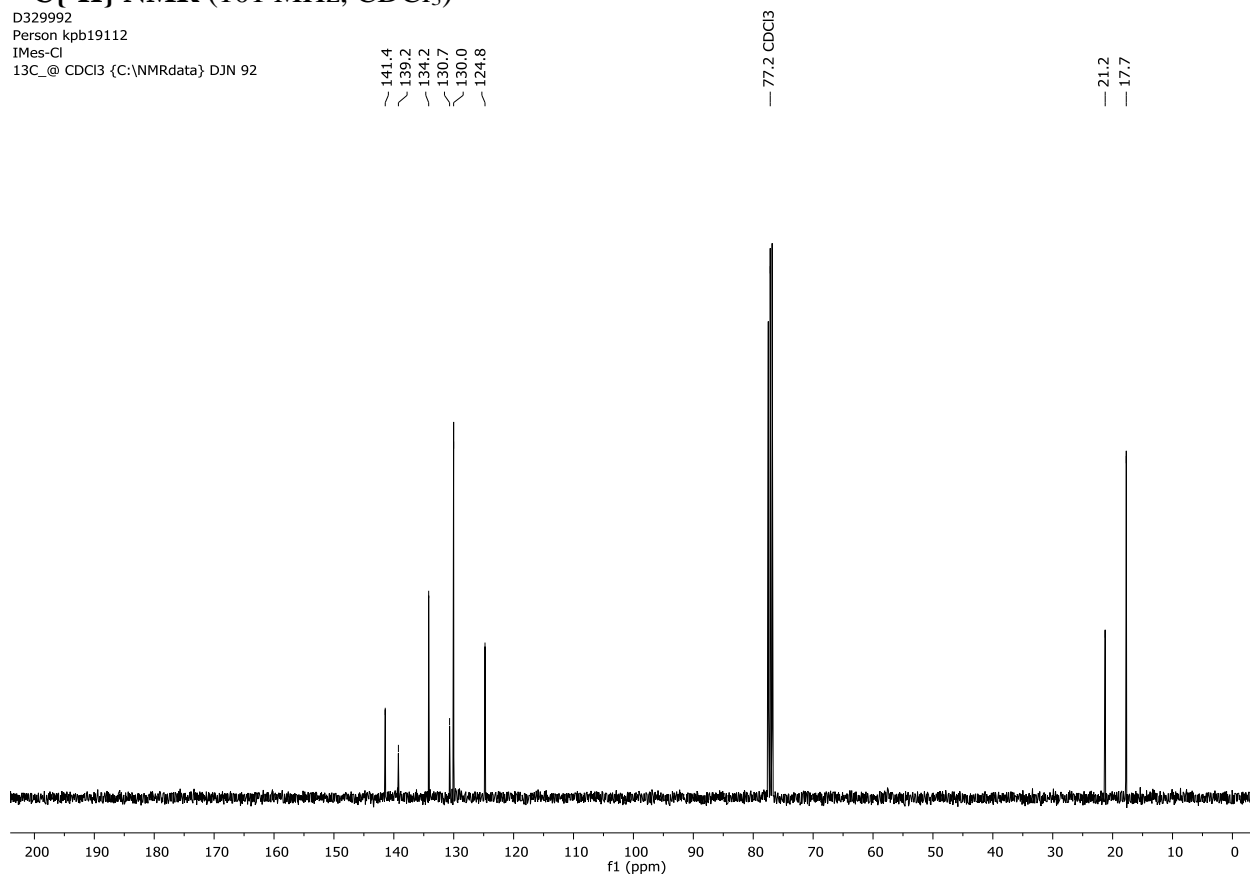

*Chloro( $\eta^4$ -cycloocta-1,5-diene)(1,3-dimesitylimidazoline-2-ylidene)iridium(I) Ir-2*  
 $^1\text{H}$  NMR (400 MHz,  $\text{CDCl}_3$ )

D318954  
 Person kpb19112  
 DT-3  
 @proton  $\text{CDCl}_3$  {C:\NMRdata} DJN 32

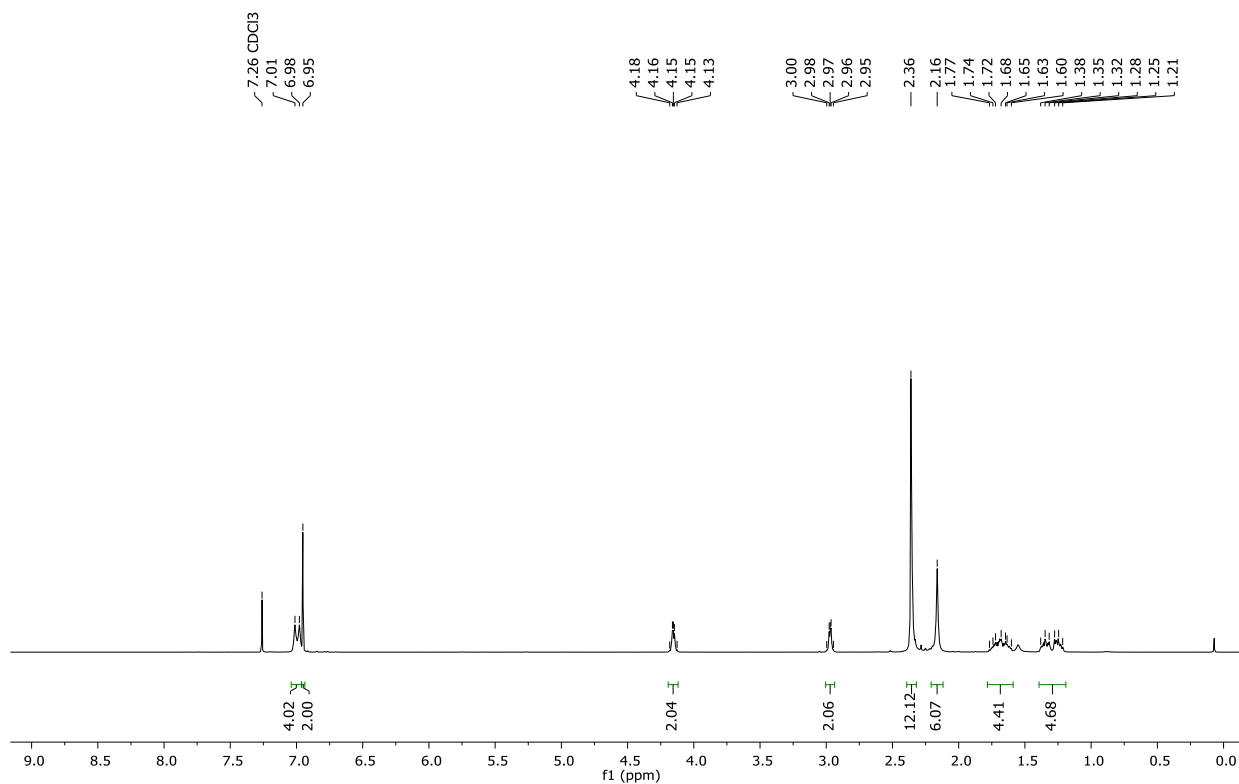

$^{13}\text{C}\{^1\text{H}\}$  NMR (101 MHz,  $\text{CDCl}_3$ )

D318953  
 Person yxb10128  
 AJS567 Fr2  
 $^{13}\text{C}_\text{@}$   $\text{CDCl}_3$  {C:\NMRdata} jam 31

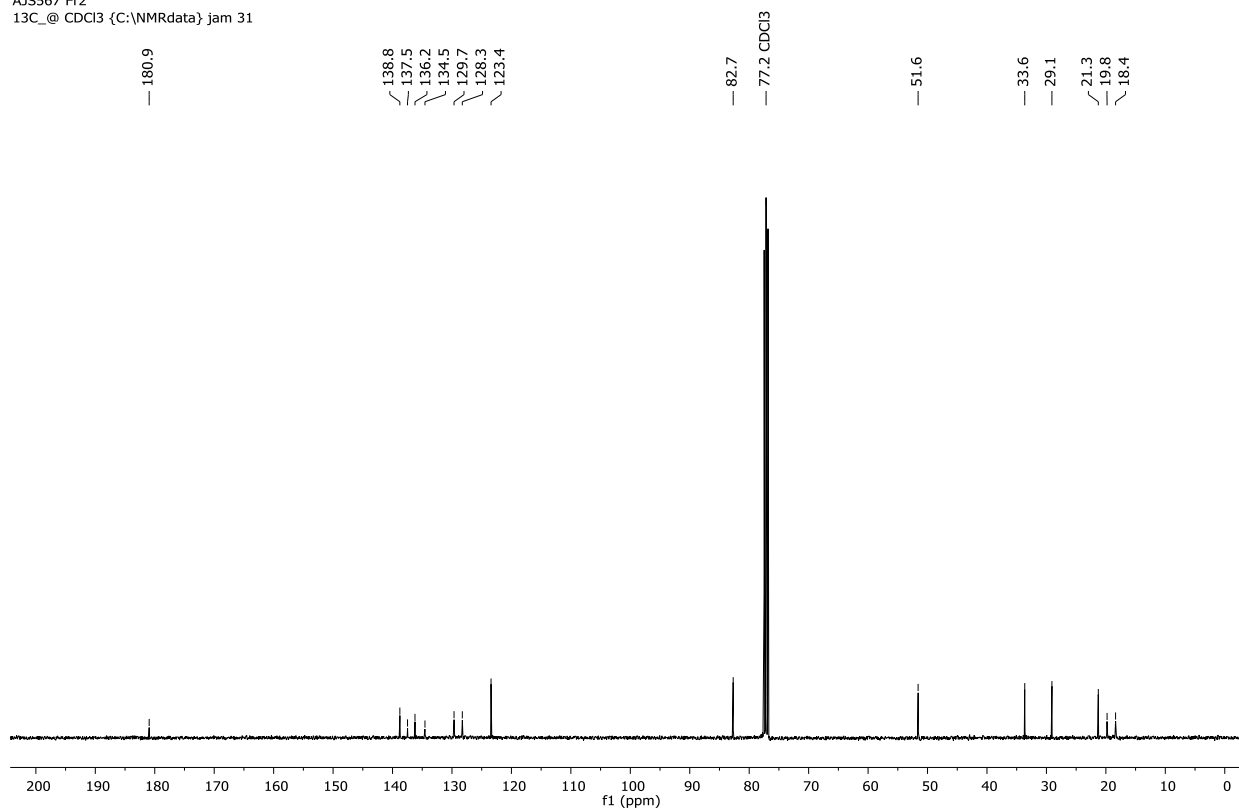

*Sodium tetrakis[3,5-bis(trifluoromethyl)phenyl]borate* (Na[BArF<sub>24</sub>])

**<sup>1</sup>H NMR** (400 MHz, acetone-*d*<sub>6</sub>)

D321566  
Person kpb19112  
DT-33-NaBArF  
@proton Acetone {C:\NMRdata} DJN 40

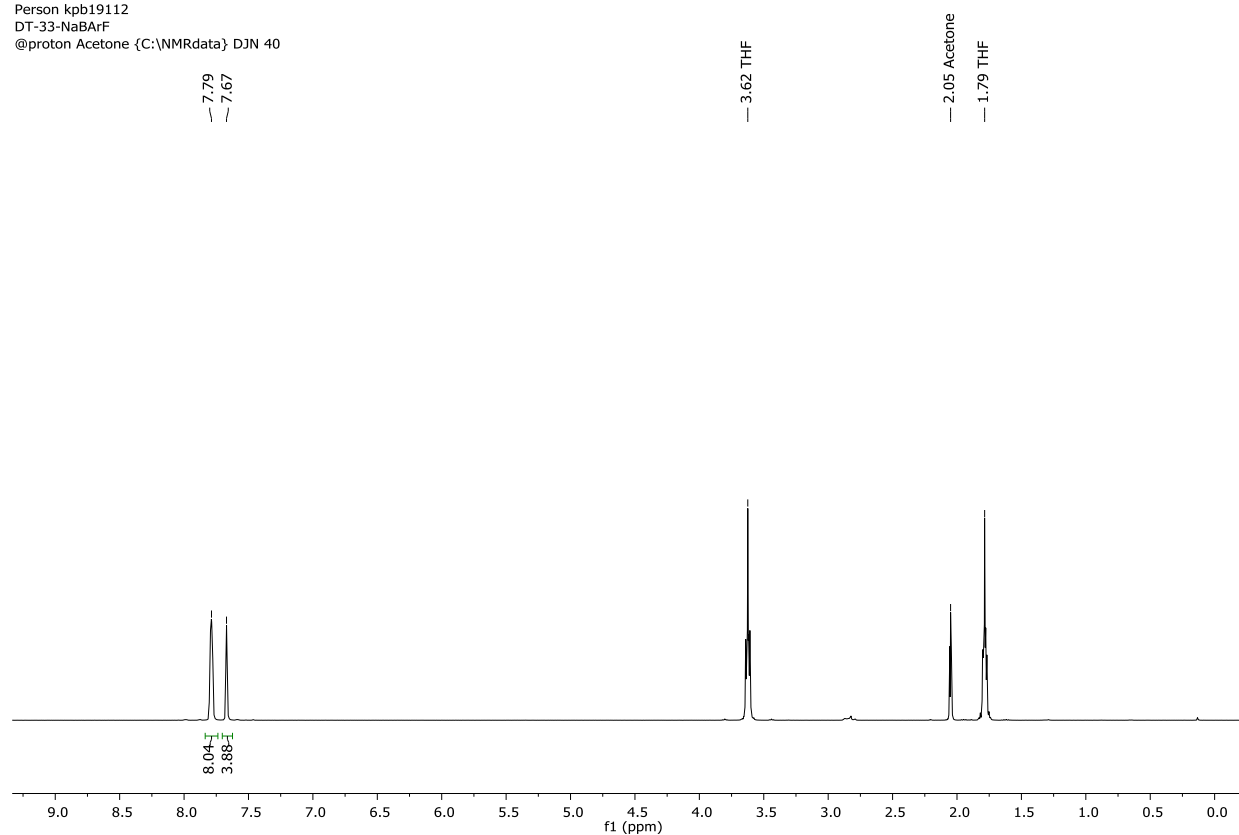

**<sup>13</sup>C{<sup>1</sup>H} NMR** (101 MHz, DMSO-*d*<sub>6</sub>)

D330145  
Person kpb19112  
NaBArF  
13C\_@ DMSO {C:\NMRdata} DJN 92

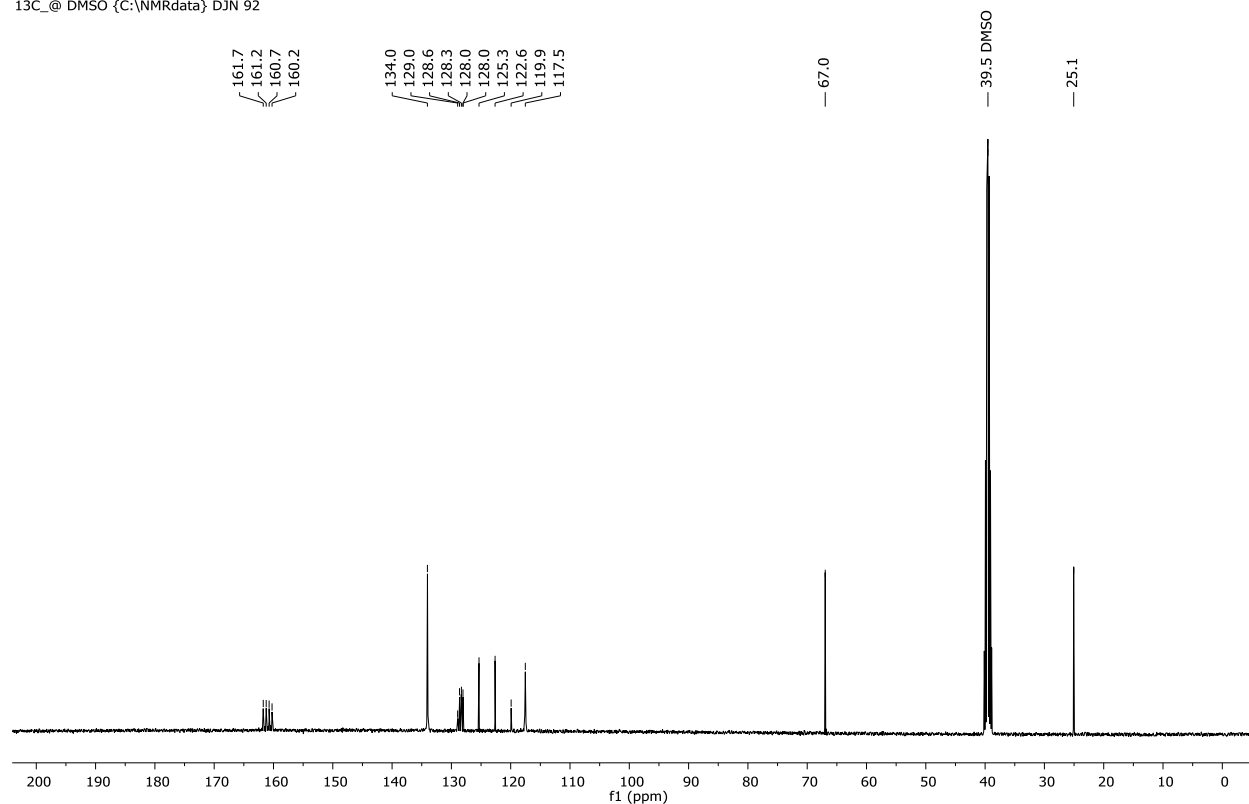



**$^{19}\text{F}$  NMR (376 MHz, acetone- $d_6$ )**

D321566  
Person kpb19112  
DT-33-NaBArF  
@19F Acetone {C:\NMRdata} DJN 40

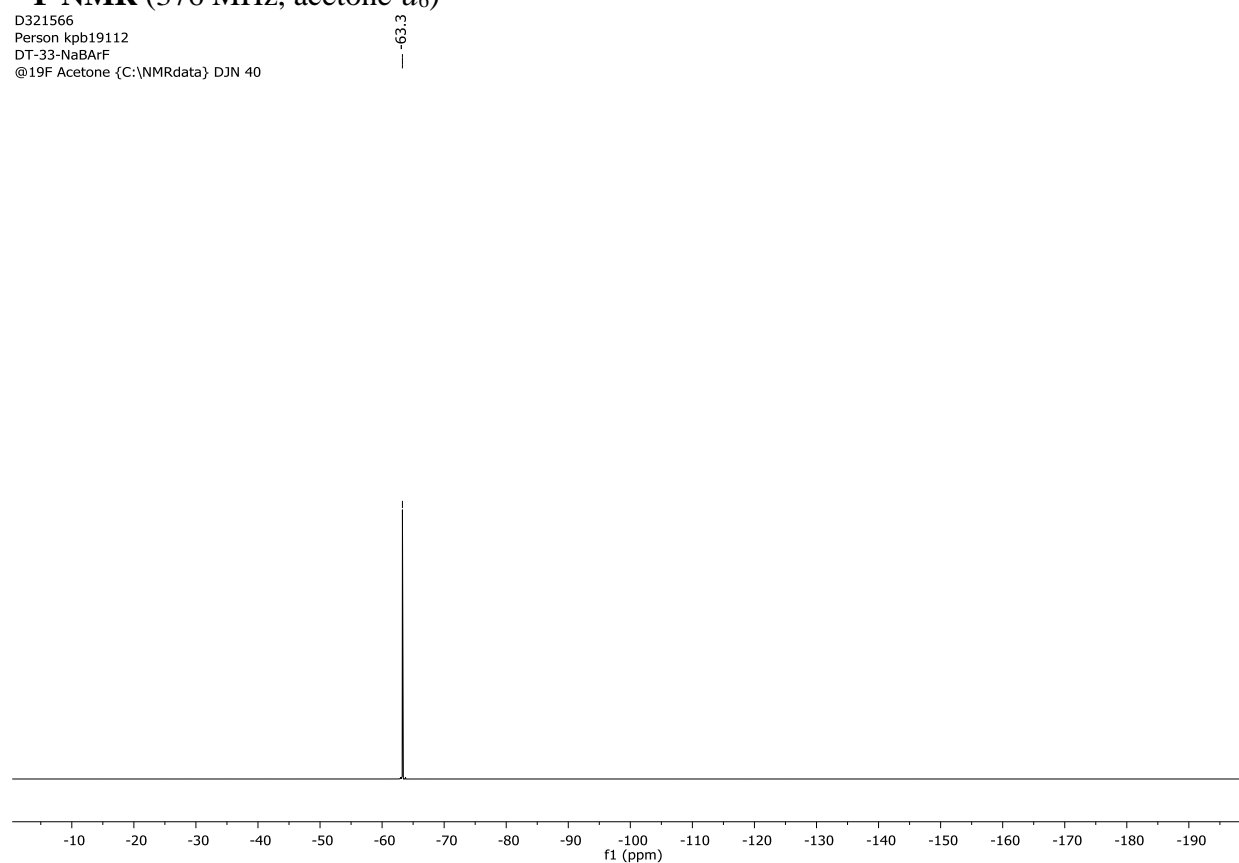

**$^{11}\text{B}$  NMR (128 MHz, acetone- $d_6$ )**

D321566  
Person kpb19112  
DT-33-NaBArF  
@B11 Acetone {C:\NMRdata} DJN 40

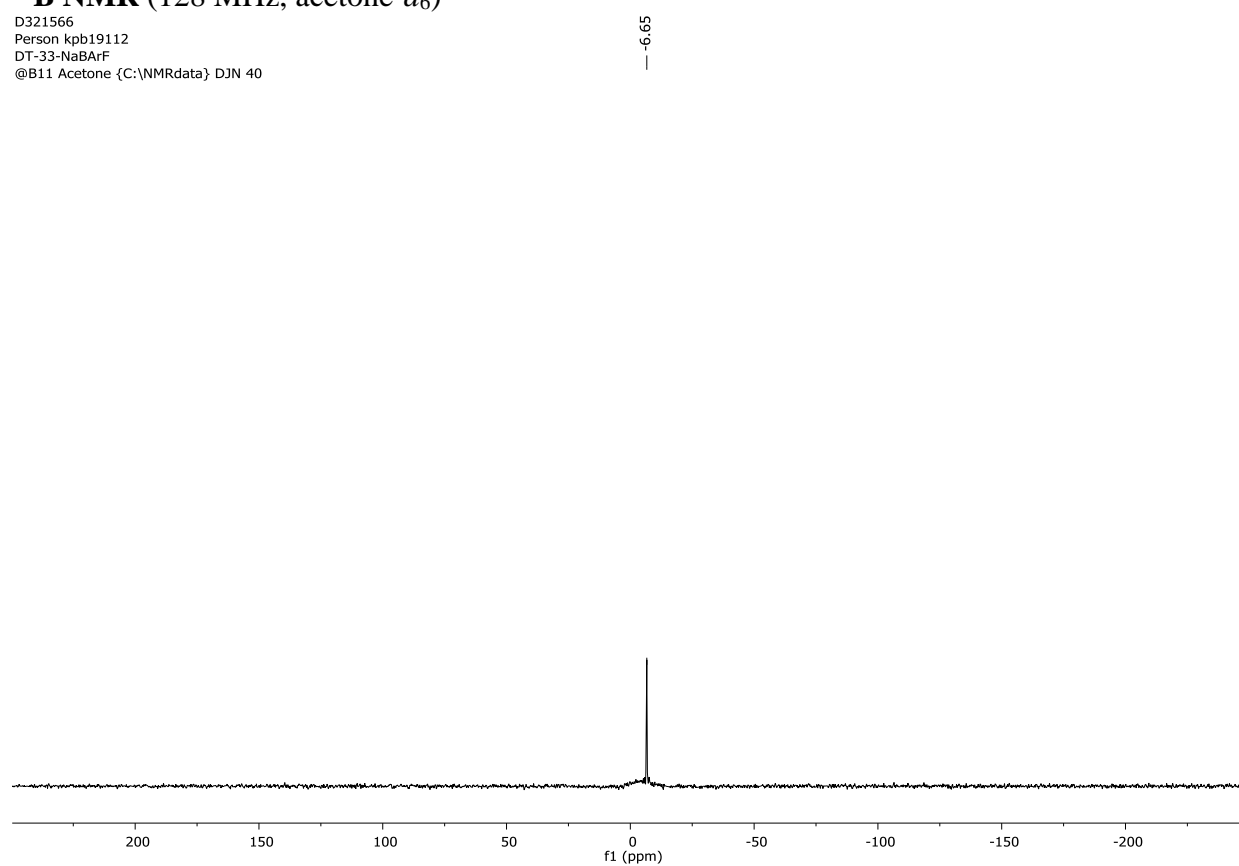

***[(COD)Ir(IMes)(PPh<sub>3</sub>)]BARF<sub>24</sub> Ir-1***

**<sup>1</sup>H NMR (400 MHz, CDCl<sub>3</sub>)**

D323541  
Person kpb19112  
DT-40-2a  
@proton CDCl3 {C:\NMRdata} DJN 10

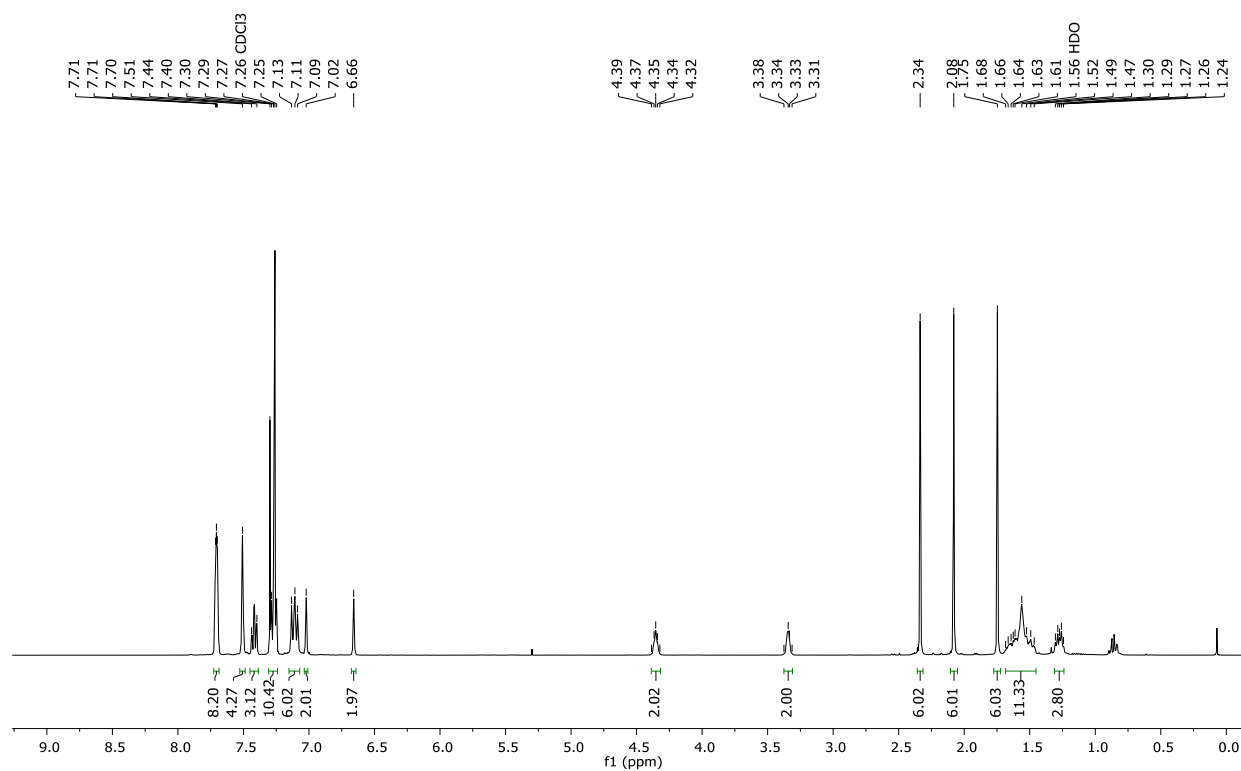

**<sup>13</sup>C{<sup>1</sup>H} NMR (101 MHz, CDCl<sub>3</sub>)**

D330147  
Person kpb19112  
DT-89  
13C\_@ CDCl3 {C:\NMRdata} DJN 94

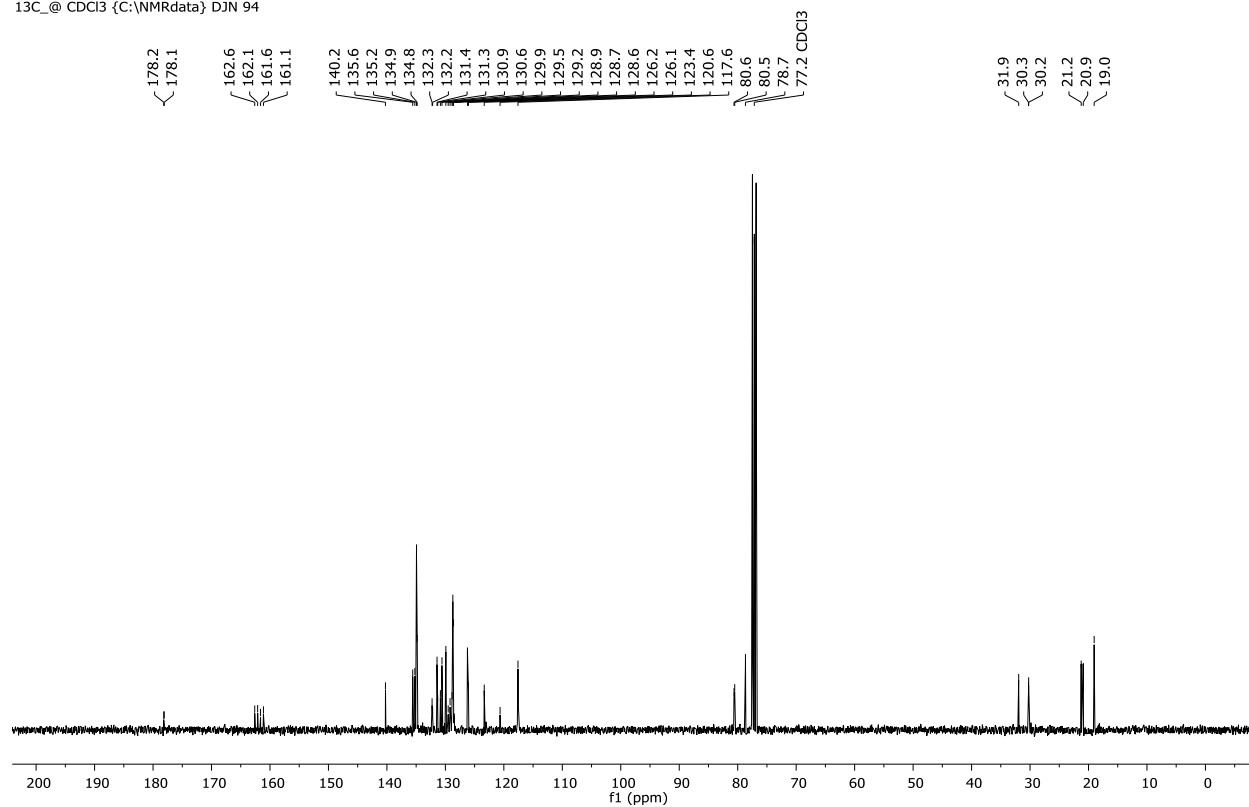

# **$^{19}\text{F}$ NMR (376 MHz, $\text{CDCl}_3$ )**

D323541

Person kpb19112

DT-40-2a

@19F  $\text{CDCl}_3$  {C:\NMRdata} DJN 10

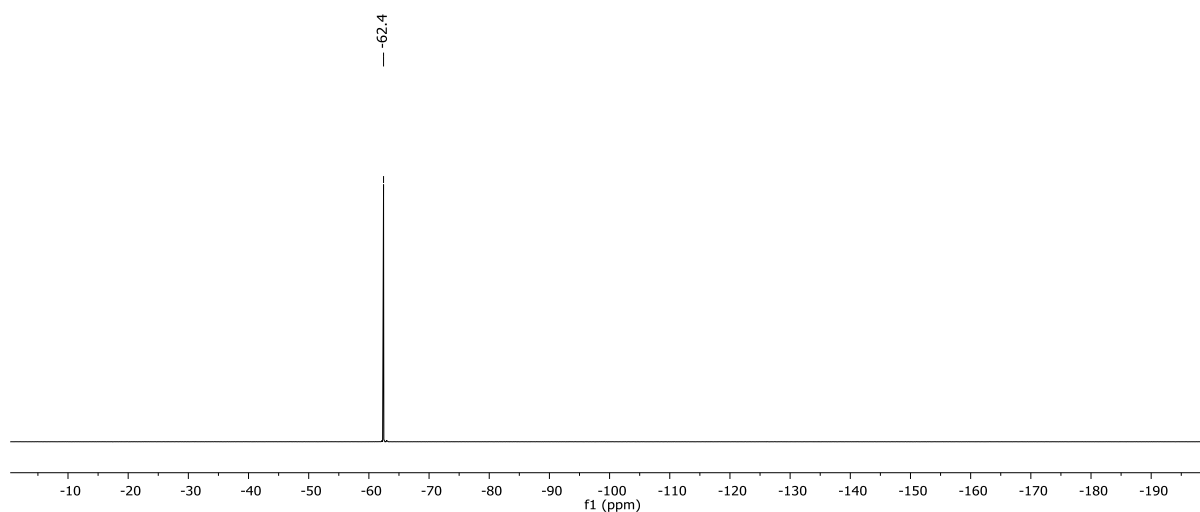

# **$^{11}\text{B}$ NMR (128 MHz, $\text{CDCl}_3$ )**

D323541

Person kpb19112

DT-40-2a

@B11  $\text{CDCl}_3$  {C:\NMRdata} DJN 10

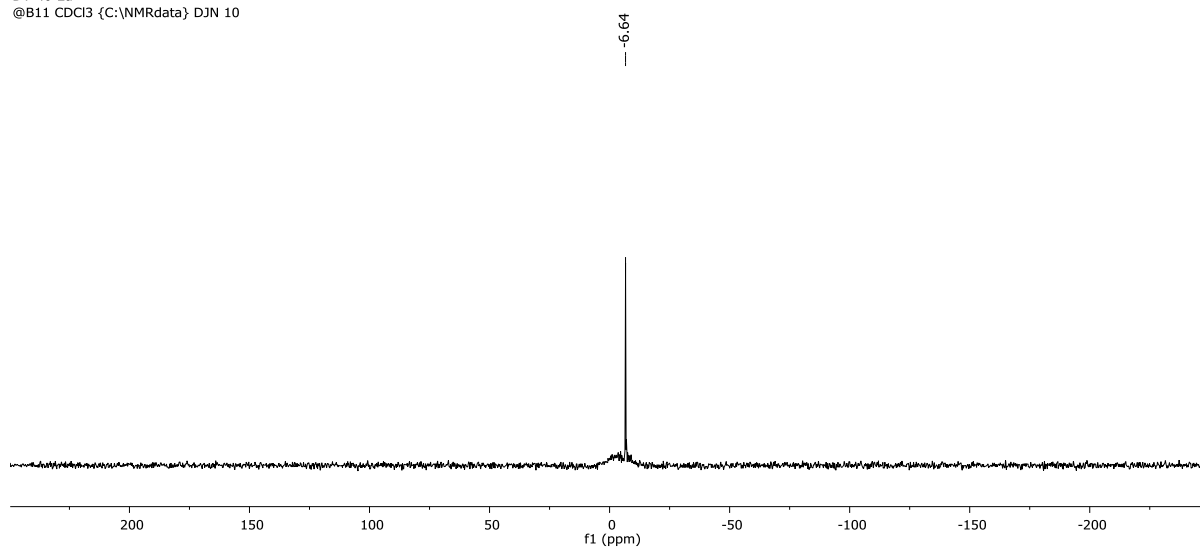

# **$^{31}\text{P}\{^1\text{H}\}$ NMR (162 MHz, $\text{CDCl}_3$ )**

D323541

Person kpb19112

DT-40-2a

@31P\_Hdec  $\text{CDCl}_3$  {C:\NMRdata} DJN 10

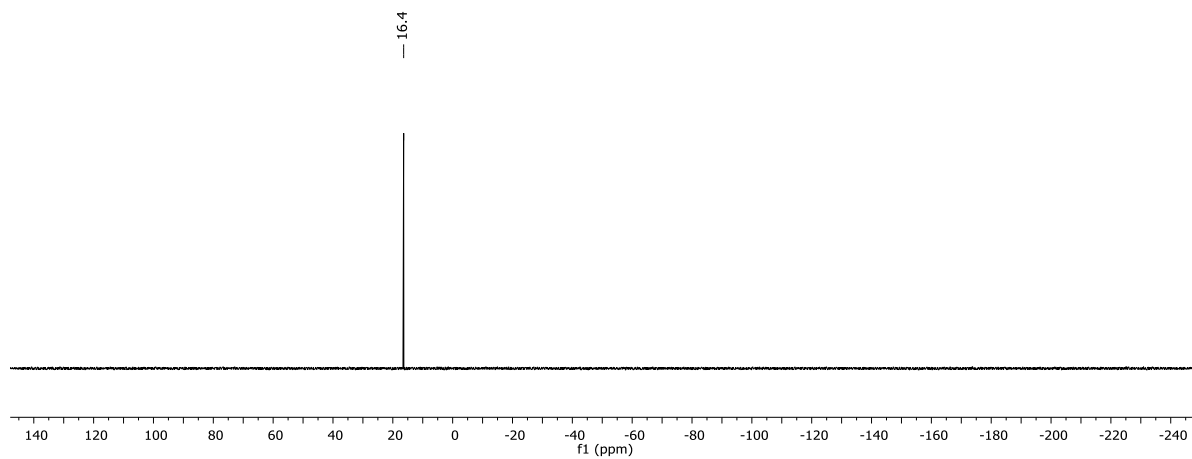

## 2-Phenylthiazoline

### $^1\text{H}$ NMR (400 MHz, $\text{CDCl}_3$ )

D319916  
Person kpb19112  
DT-20-DG-15  
@proton  $\text{CDCl}_3$  {C:\NMRdata} DJN 5

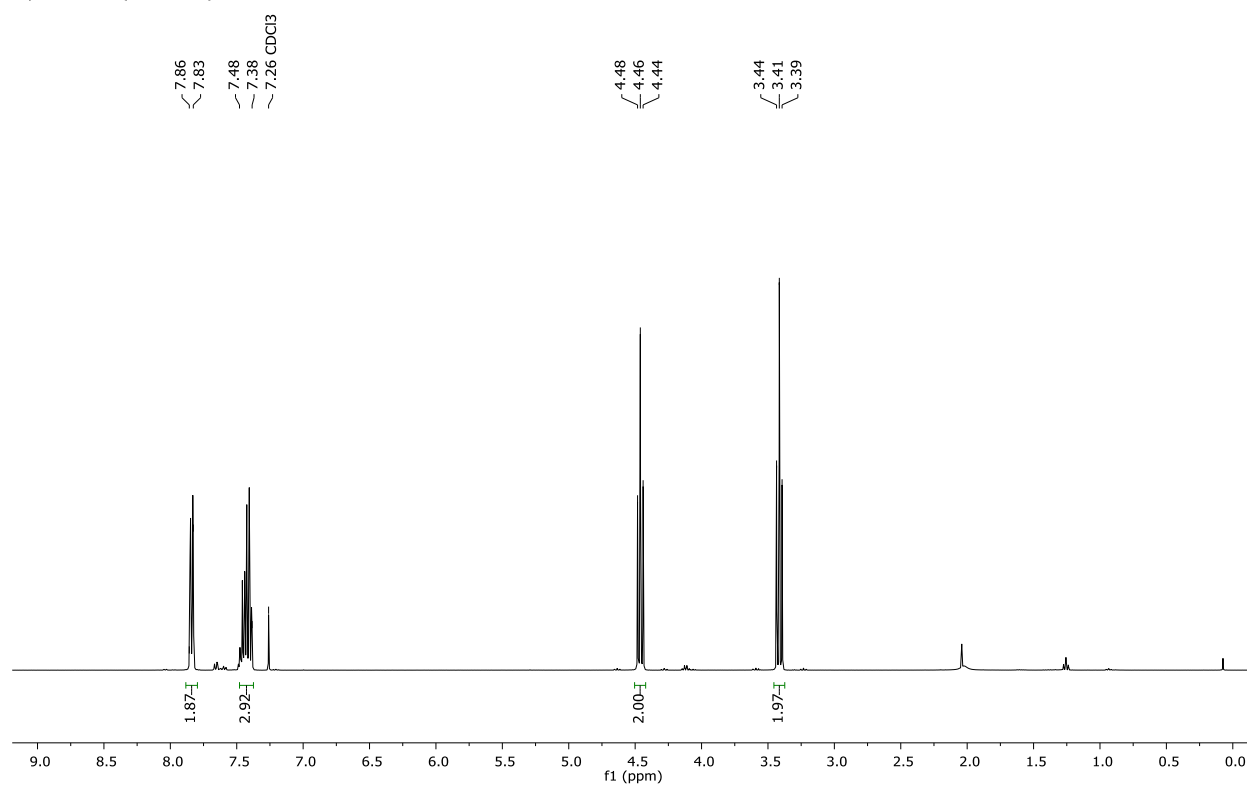

### $^{13}\text{C}\{^1\text{H}\}$ NMR (101 MHz, $\text{CDCl}_3$ )

D329993  
Person kpb19112  
Ph-thiazoline  
 $^{13}\text{C}_\text{@}$   $\text{CDCl}_3$  {C:\NMRdata} DJN 27

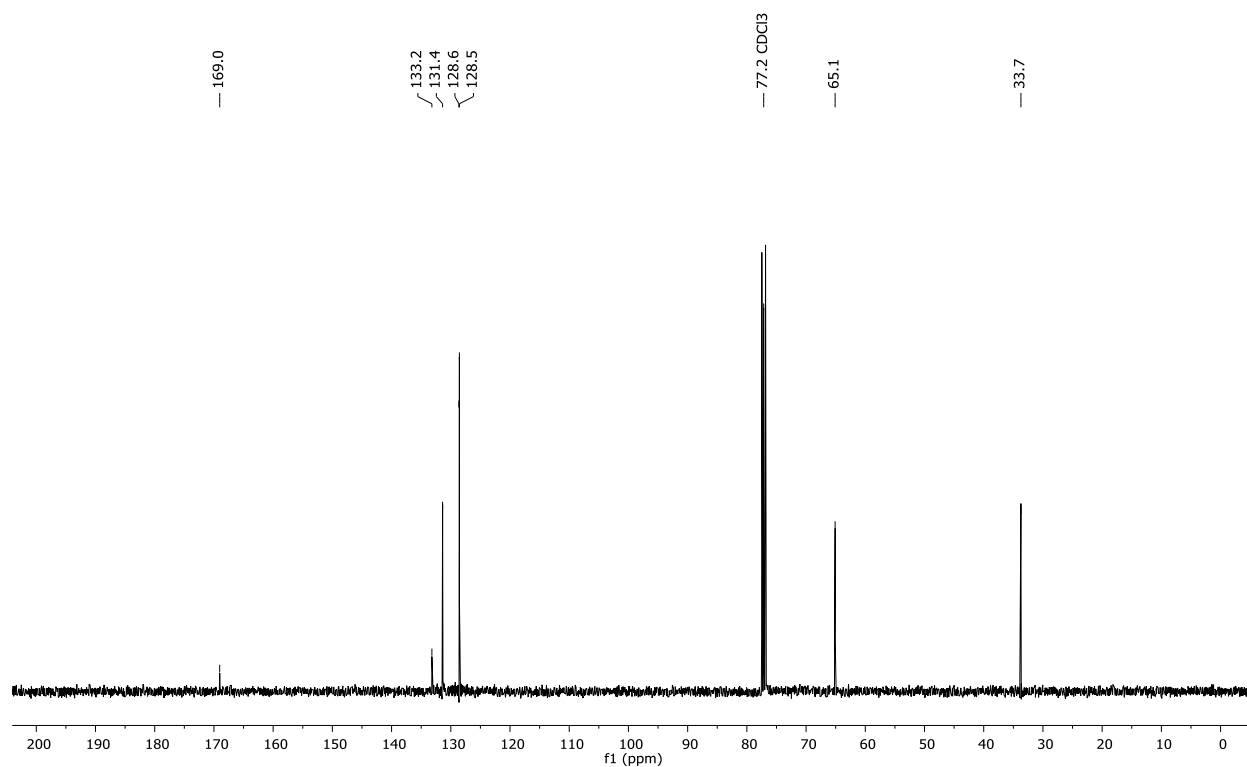

## 2-Phenylthiazole

### $^1\text{H}$ NMR (400 MHz, $\text{CDCl}_3$ )

D318663  
Person kpb19112  
DT-DG-10  
@proton  $\text{CDCl}_3$  {C:\NMRdata} DJN 21

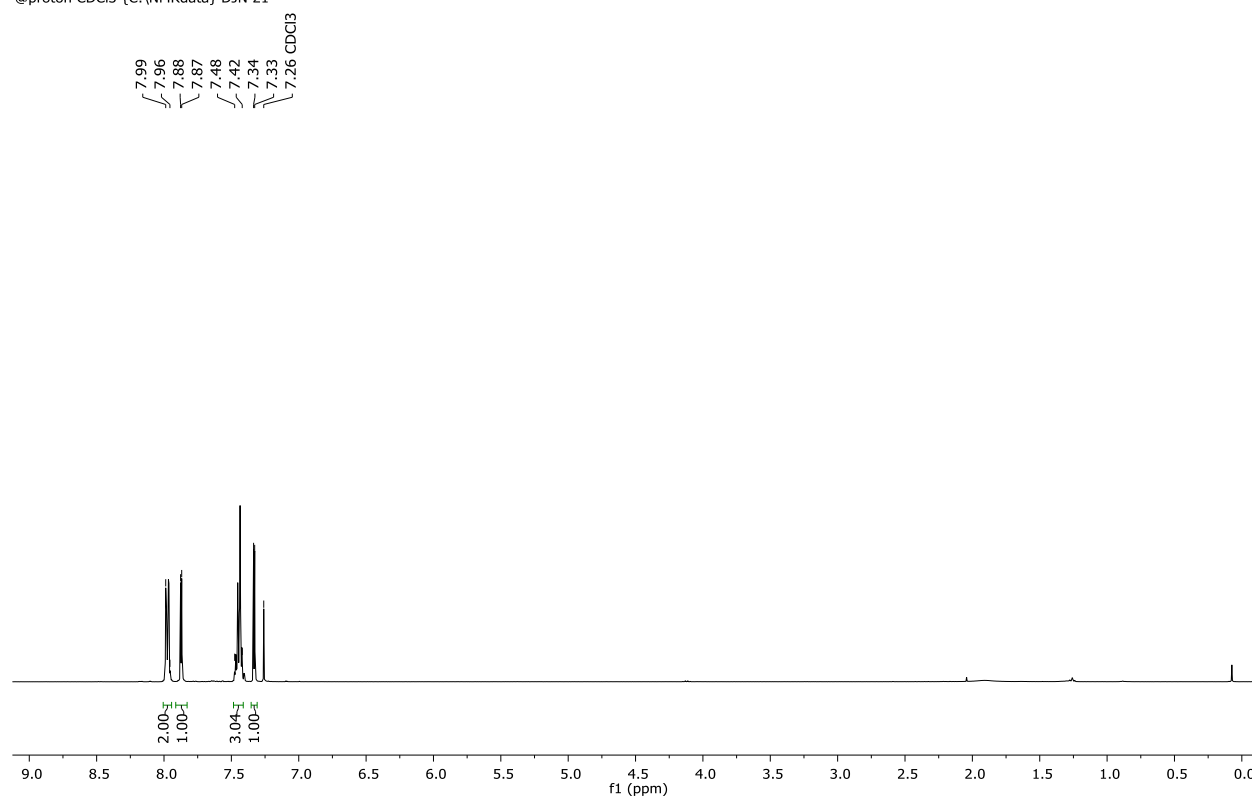

### $^{13}\text{C}\{^1\text{H}\}$ NMR (101 MHz, $\text{CDCl}_3$ )

B61716  
Person kpb19112  
DT-105 (Ph-thiazole)  
@13C\_dec  $\text{CDCl}_3$  {C:\NMRdata} DJN 54

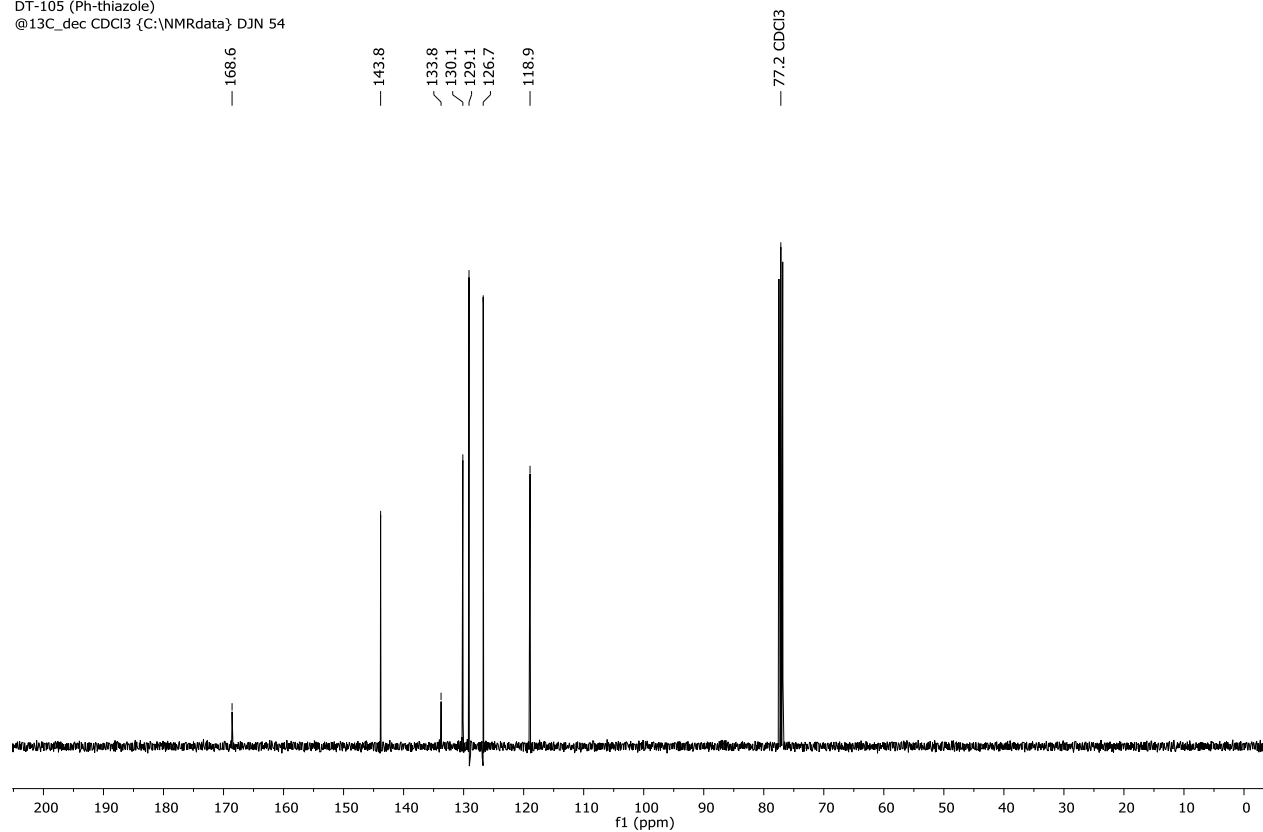

*1-Methyl-2-phenylimidazole*

**<sup>1</sup>H NMR (400 MHz, CDCl<sub>3</sub>)**

D323243

Person kpb19112

DT-57-DG-20

@proton CDCl<sub>3</sub> {C:\NMRdata} DJN 25

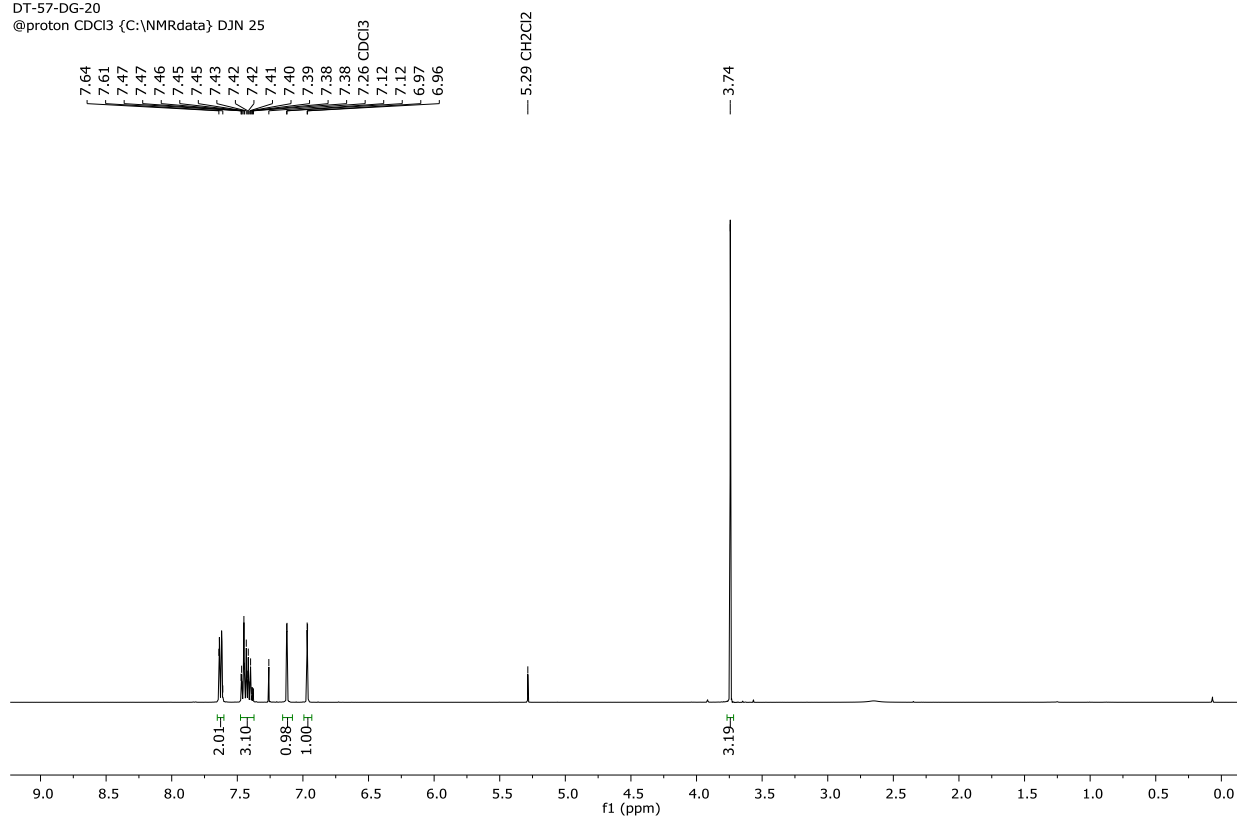

**<sup>13</sup>C{<sup>1</sup>H} NMR (101 MHz, CDCl<sub>3</sub>)**

D329994

Person kpb19112

Ph-Me-imidazole

<sup>13</sup>C\_@ CDCl<sub>3</sub> {C:\NMRdata} DJN 28

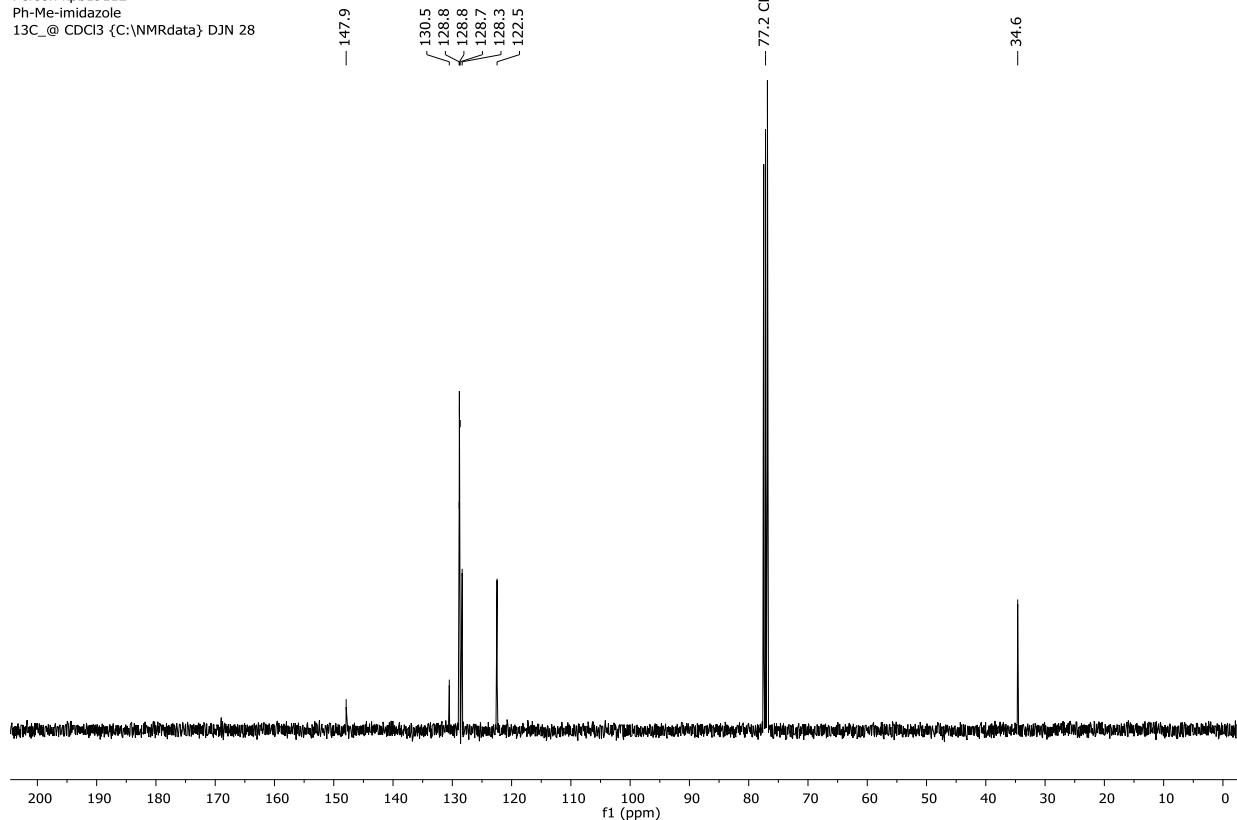

## 2-Phenylpyrimidine

### $^1\text{H}$ NMR (400 MHz, $\text{CDCl}_3$ )

D330148

Person kpb19112

pyrimidine -Ph

@proton  $\text{CDCl}_3$  {C:\NMRdata} DJN 95

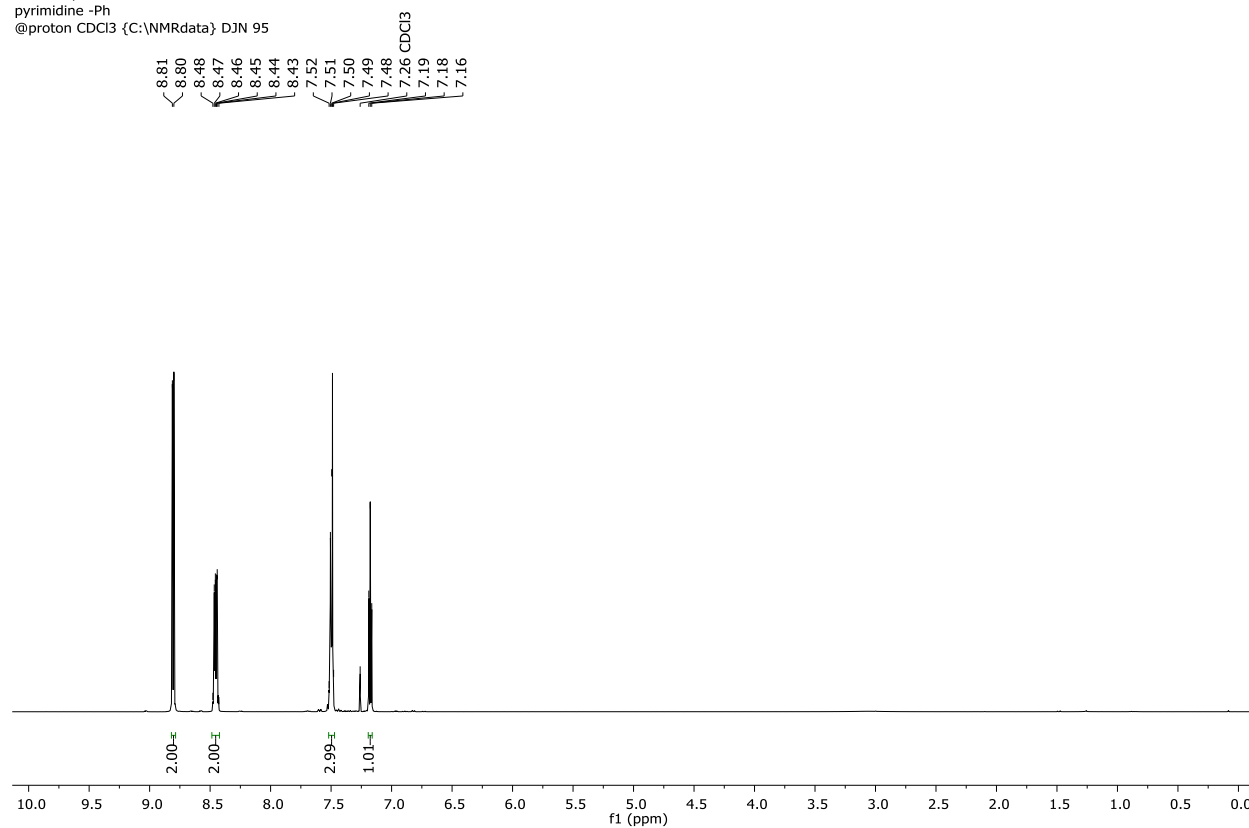

### $^{13}\text{C}\{^1\text{H}\}$ NMR (101 MHz, $\text{CDCl}_3$ )

D329995

Person kpb19112

Ph-pyrimidine

$^{13}\text{C}_\alpha$   $\text{CDCl}_3$  {C:\NMRdata} DJN 29

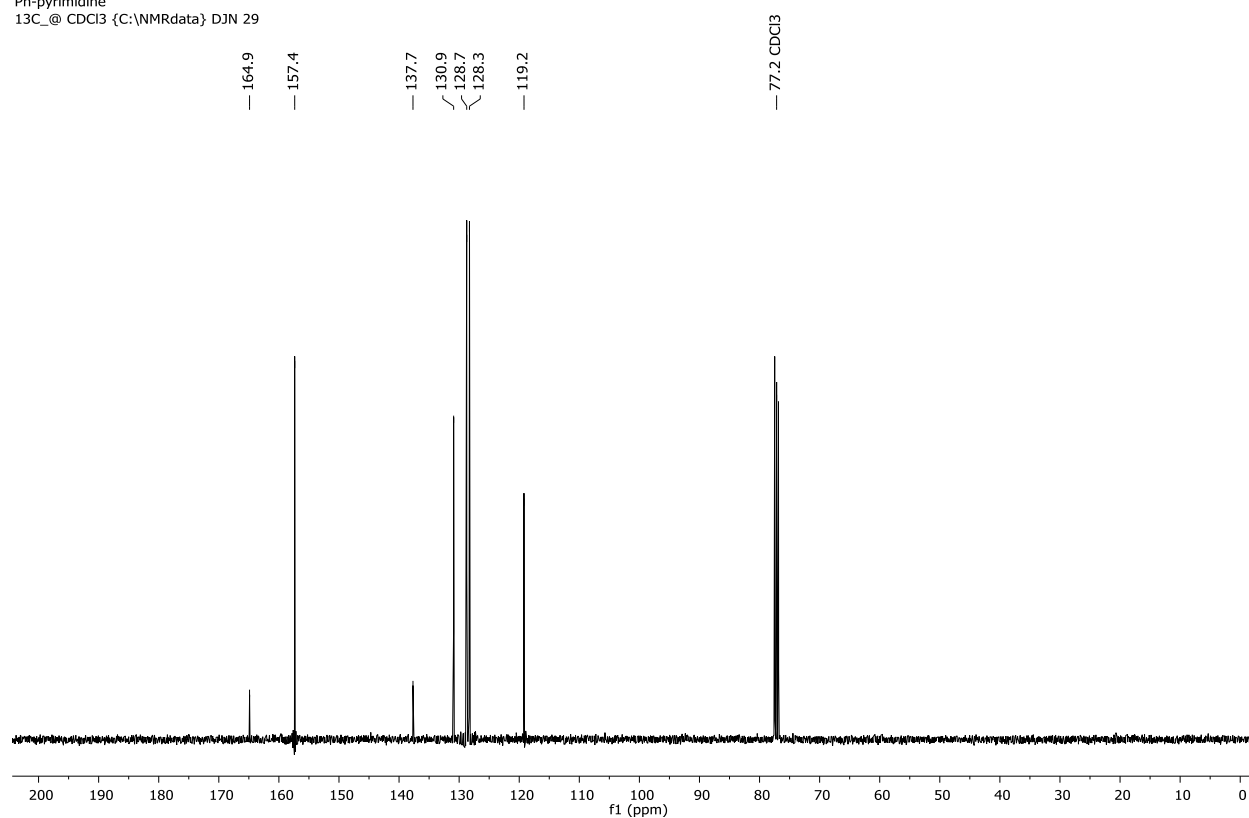

*2-(4-acetyl)phenylpyridine*  
<sup>1</sup>H NMR (400 MHz, CDCl<sub>3</sub>)

D324484

Person kpb19112

DT-68nondeut.

@proton CDCl3 {C:\NMRdata} DJN 99

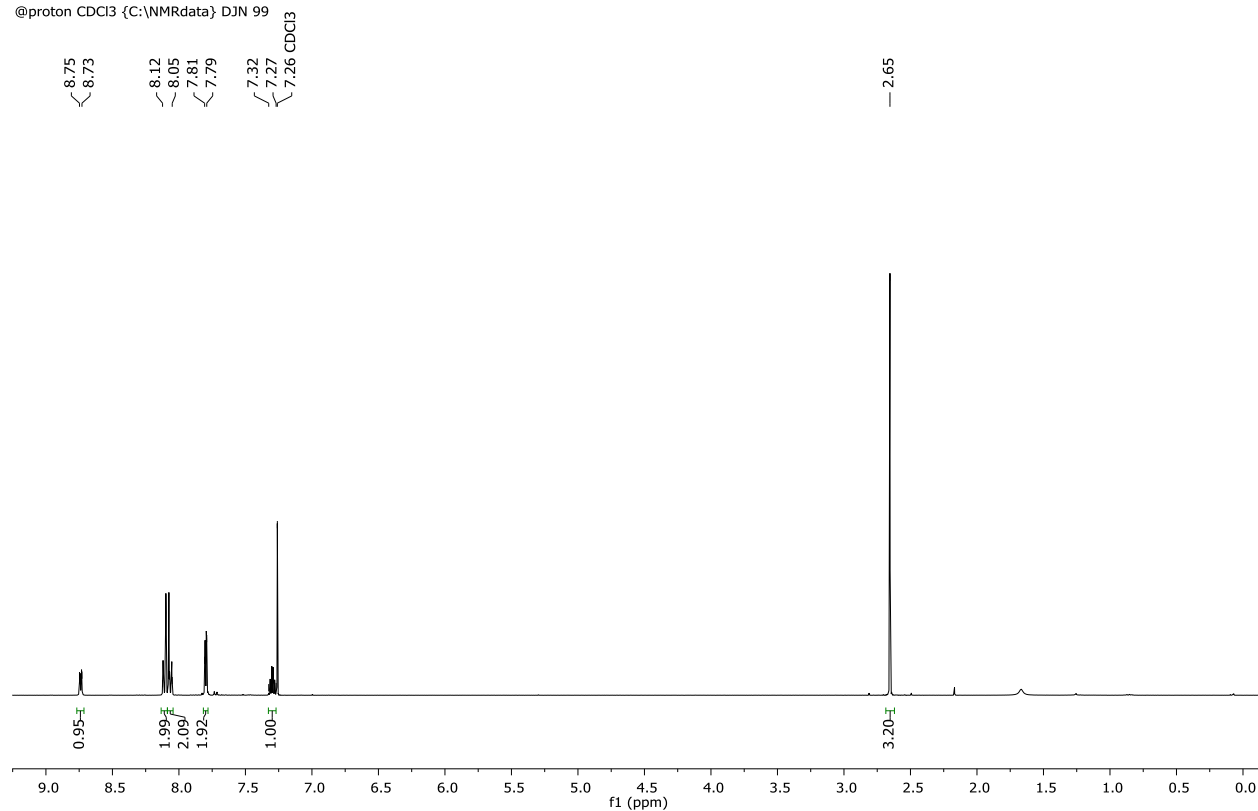

<sup>13</sup>C{<sup>1</sup>H} NMR (101 MHz, CDCl<sub>3</sub>)

D324484

Person kpb19112

DT-68nondeut.

13C\_@ CDCl3 {C:\NMRdata} DJN 99

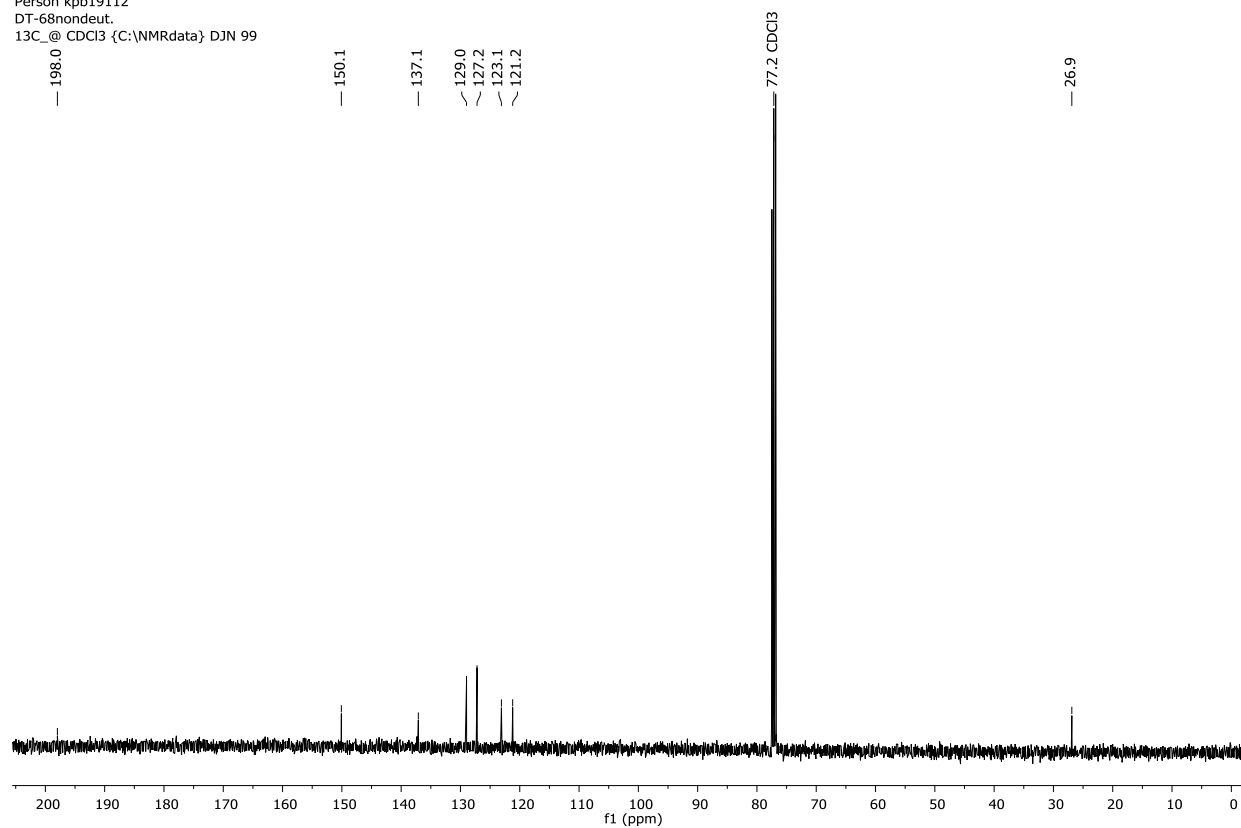



# 2-(4-acetyl)phenyloxazoline

## <sup>1</sup>H NMR (400 MHz, CDCl<sub>3</sub>)

D324487  
Person kpb19112  
DT-69nondet  
@proton CDCl3 {C:\NMRdata} DJN 10053

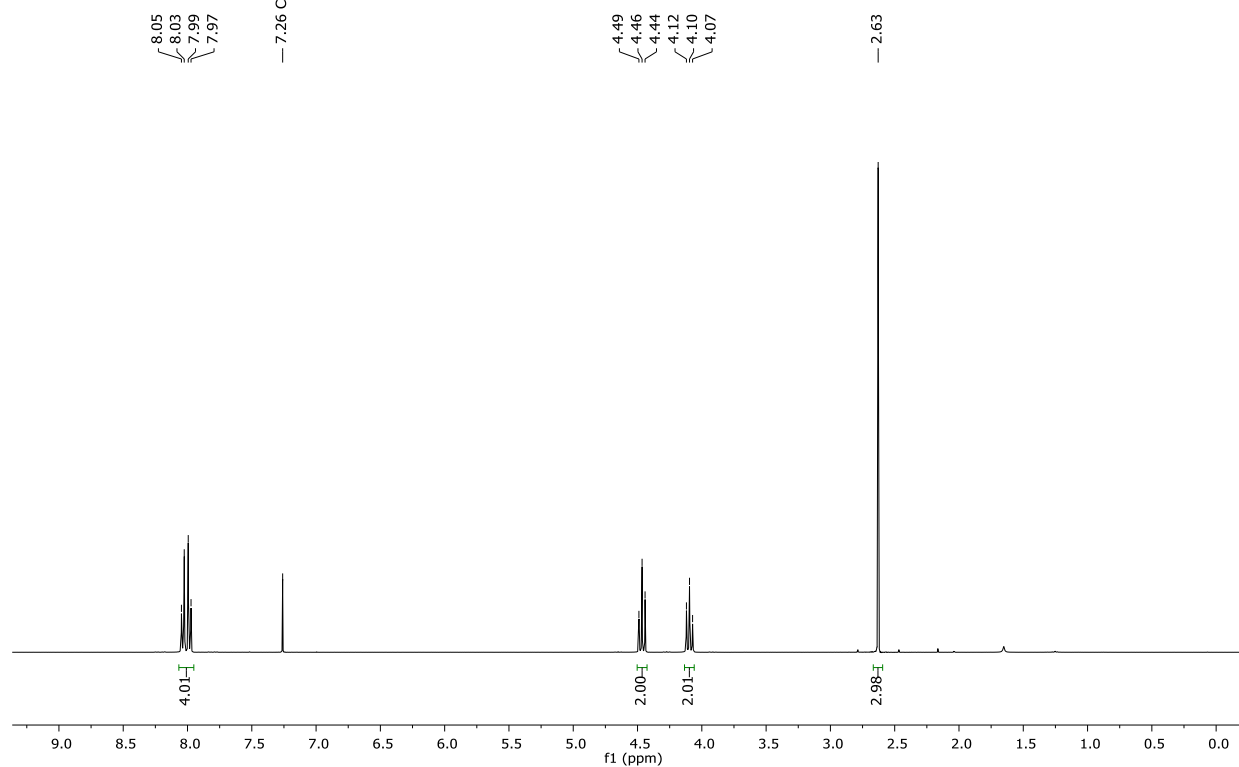

## <sup>13</sup>C{<sup>1</sup>H} NMR (101 MHz, CDCl<sub>3</sub>)

D324487  
Person kpb19112  
DT-69nondet  
13C\_@ CDCl3 {C:\NMRdata} DJN 100

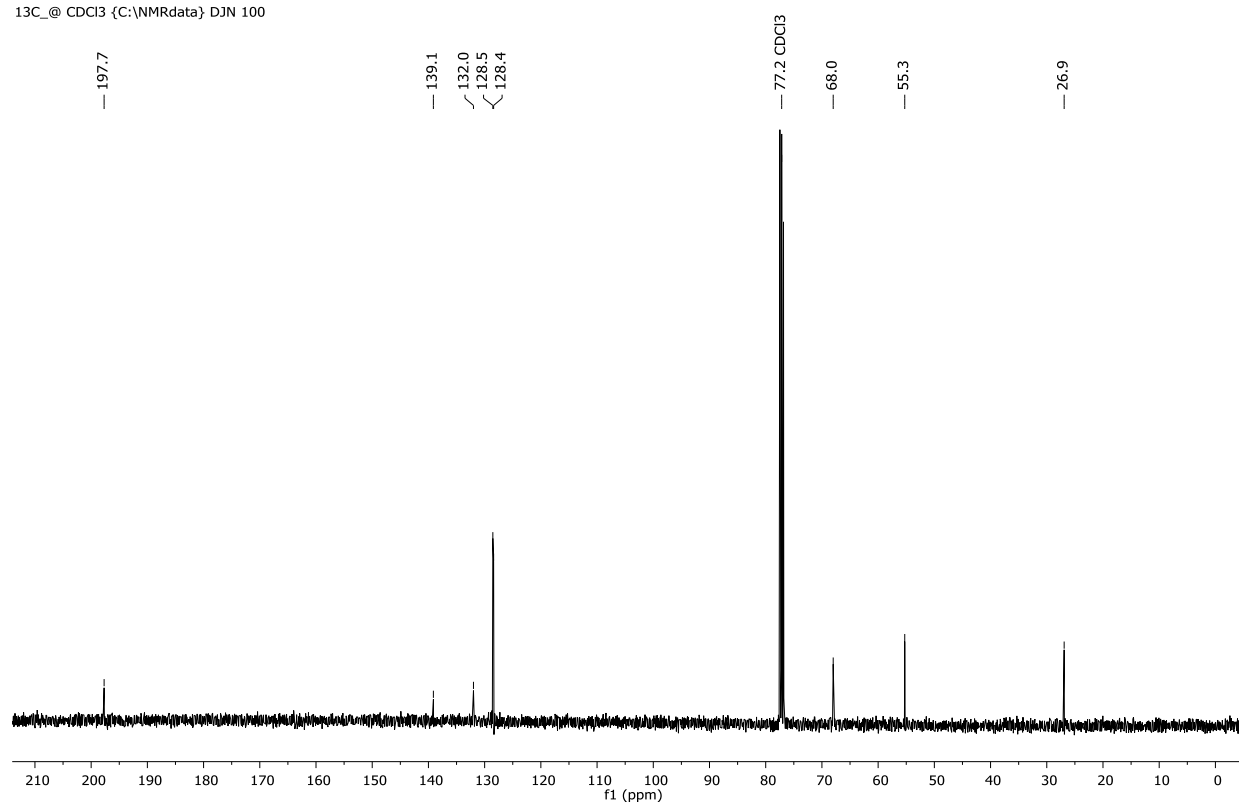

# 2-(4-cyano)phenylpyridine

## <sup>1</sup>H NMR (400 MHz, CDCl<sub>3</sub>)

D260096

Person 23-3

100816-1

@proton CDCl3 {C:\NMRdata} DJN 1

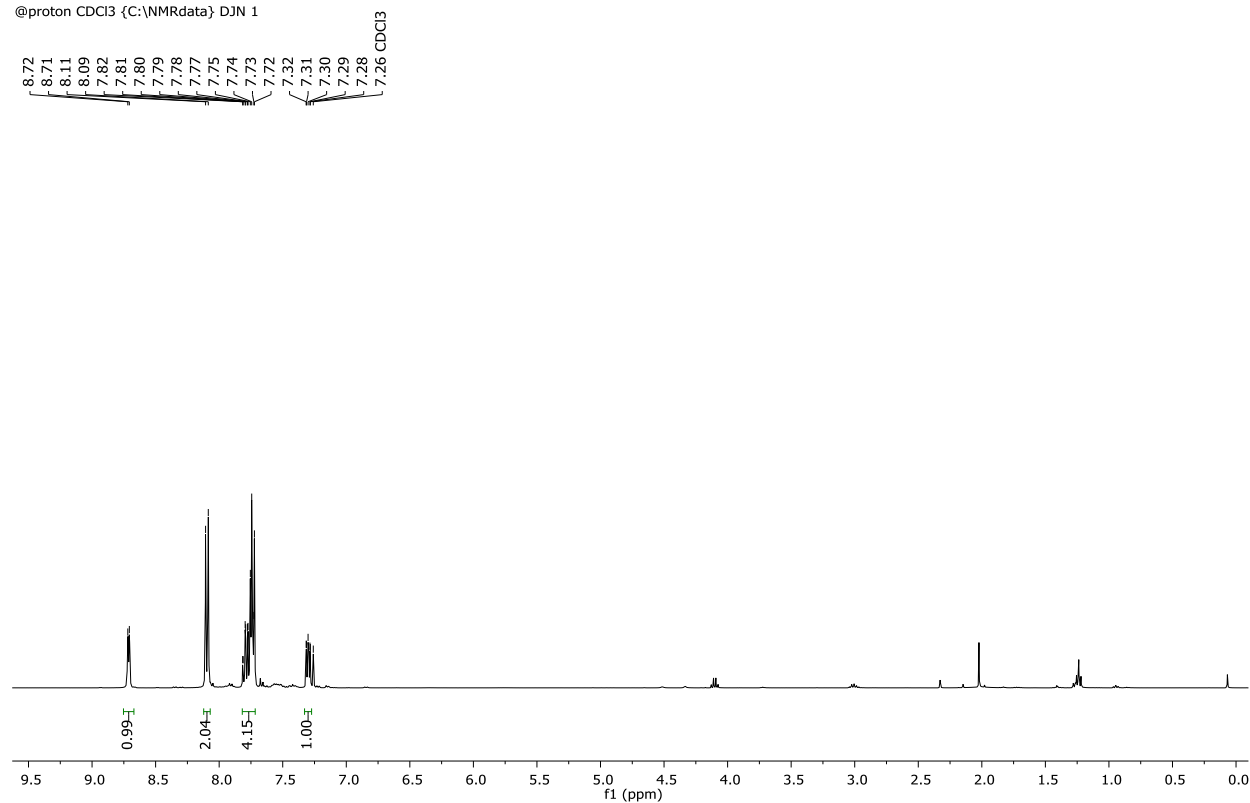

## <sup>13</sup>C{<sup>1</sup>H} NMR (101 MHz, CDCl<sub>3</sub>)

D260096

Person 23-3

100816-1

13C\_@ CDCl3 {C:\NMRdata} DJN 1

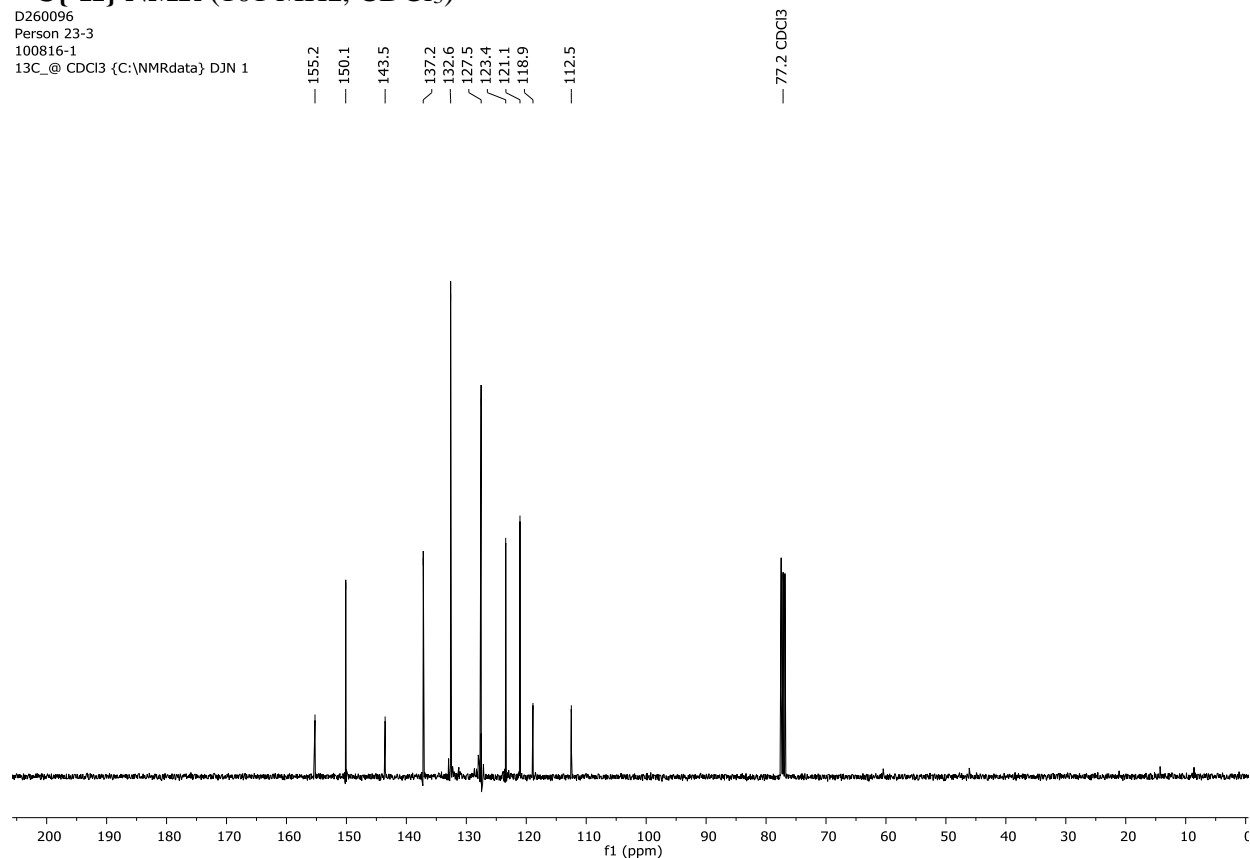

2-(4-(pyridin-2-yl)phenyl)-4,5-dihydrooxazole

<sup>1</sup>H NMR (400 MHz, CDCl<sub>3</sub>)

D324488

Person kpb19112

DT-70nondeut

@proton CDCl<sub>3</sub> {C:\NMRdata} DJN 101

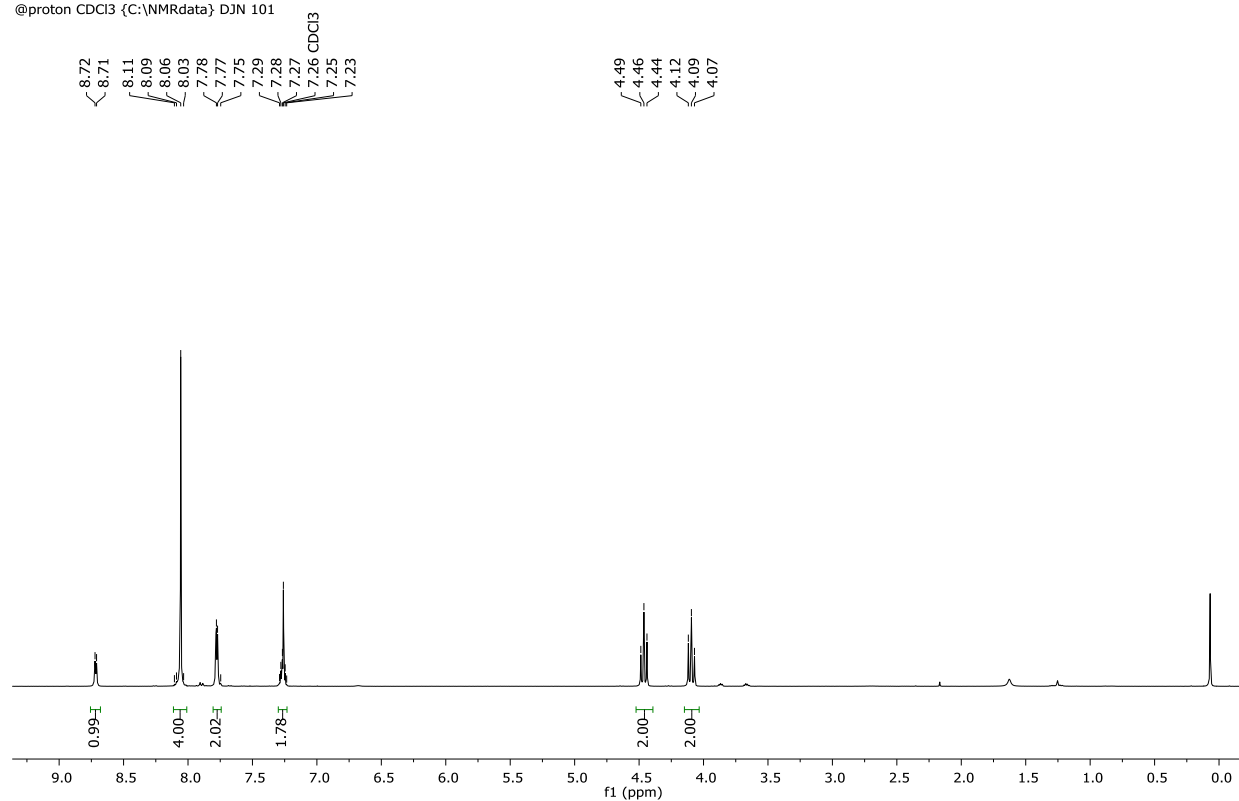

<sup>13</sup>C{<sup>1</sup>H} NMR (101 MHz, CDCl<sub>3</sub>)

D259149

Person 23-3

Pyridine-oxazoline

13C\_@ CDCl<sub>3</sub> {C:\NMRdata} DJN 1

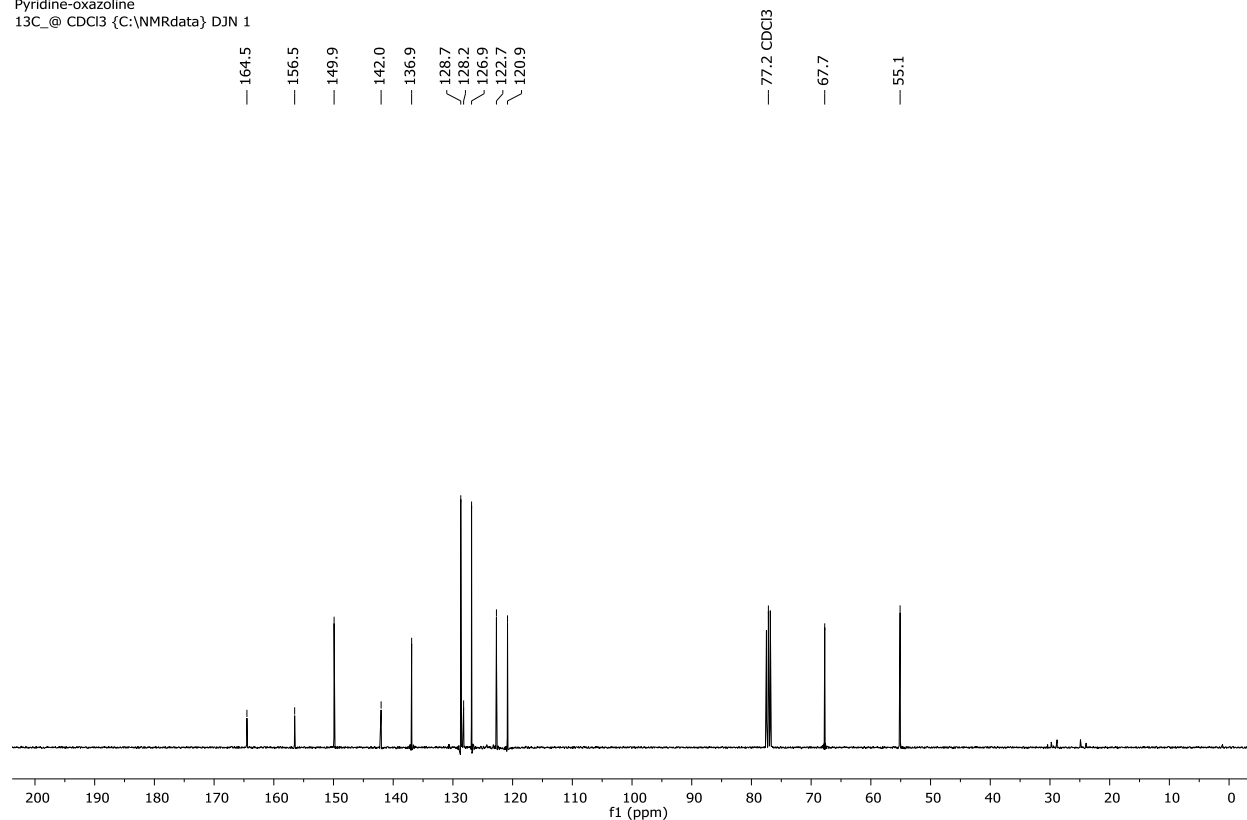

## 6.2. $^1\text{H}$ NMR of non-deuterated commercial substrates

Acetophenone

$^1\text{H}$  NMR (400 MHz,  $\text{CDCl}_3$ )

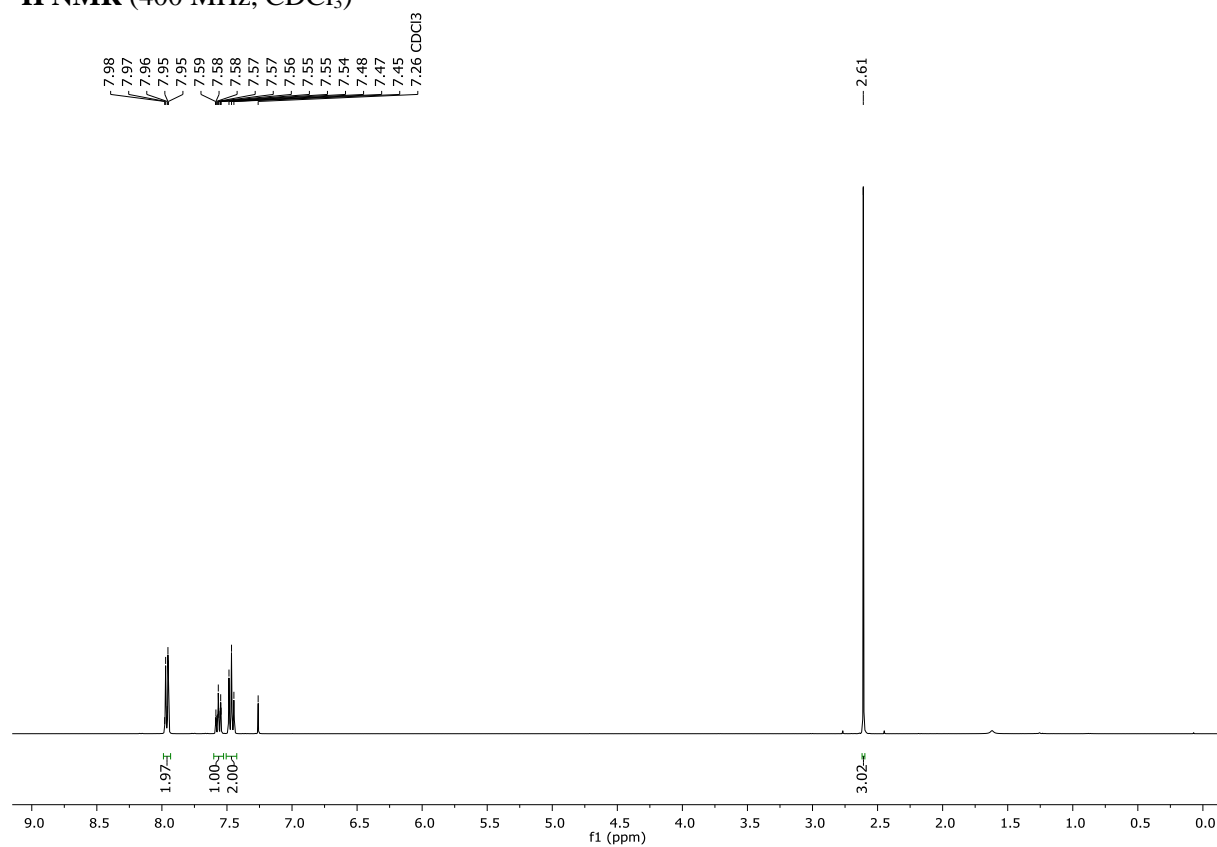

Acetophenone

$^1\text{H}$  NMR (400 MHz,  $\text{DMSO}-d_6$ )

D330538

Person kpb19112

Ph-COCH<sub>3</sub>

@proton DMSO {C:\NMRdata} DJN 38

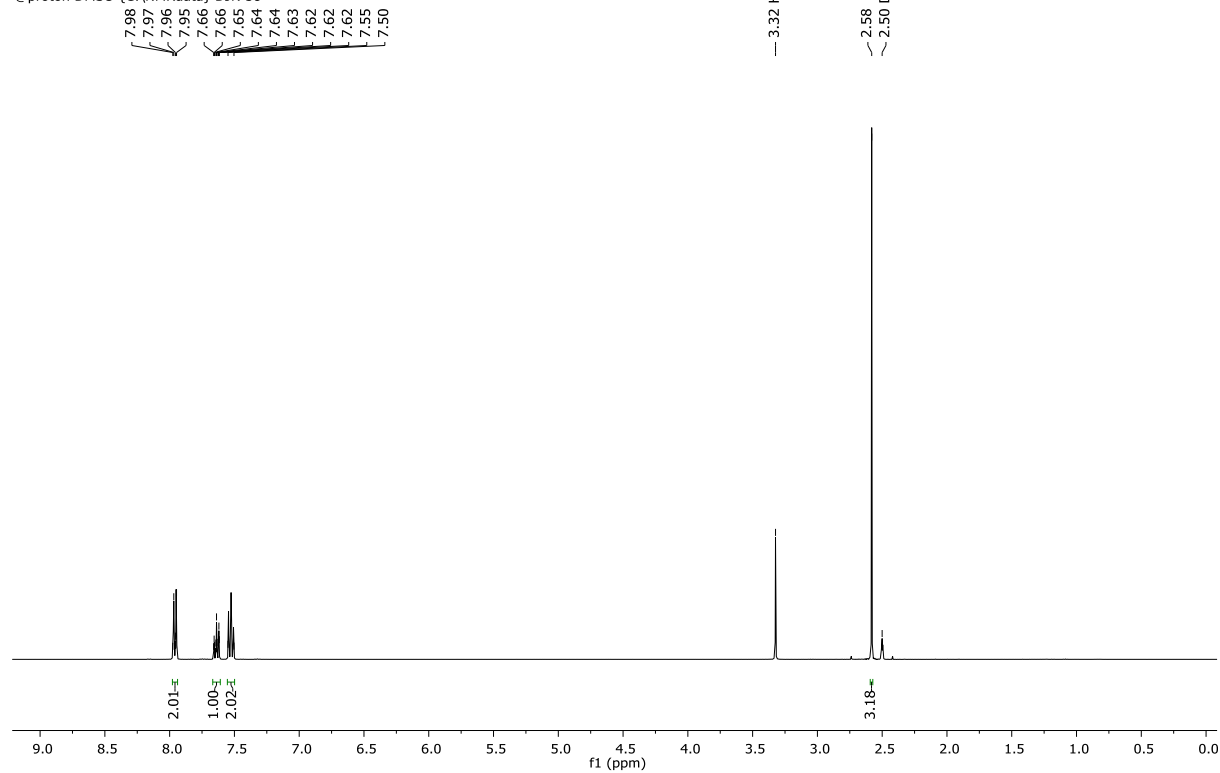

*Benzophenone*

$^1\text{H}$  NMR (400 MHz,  $\text{CDCl}_3$ )

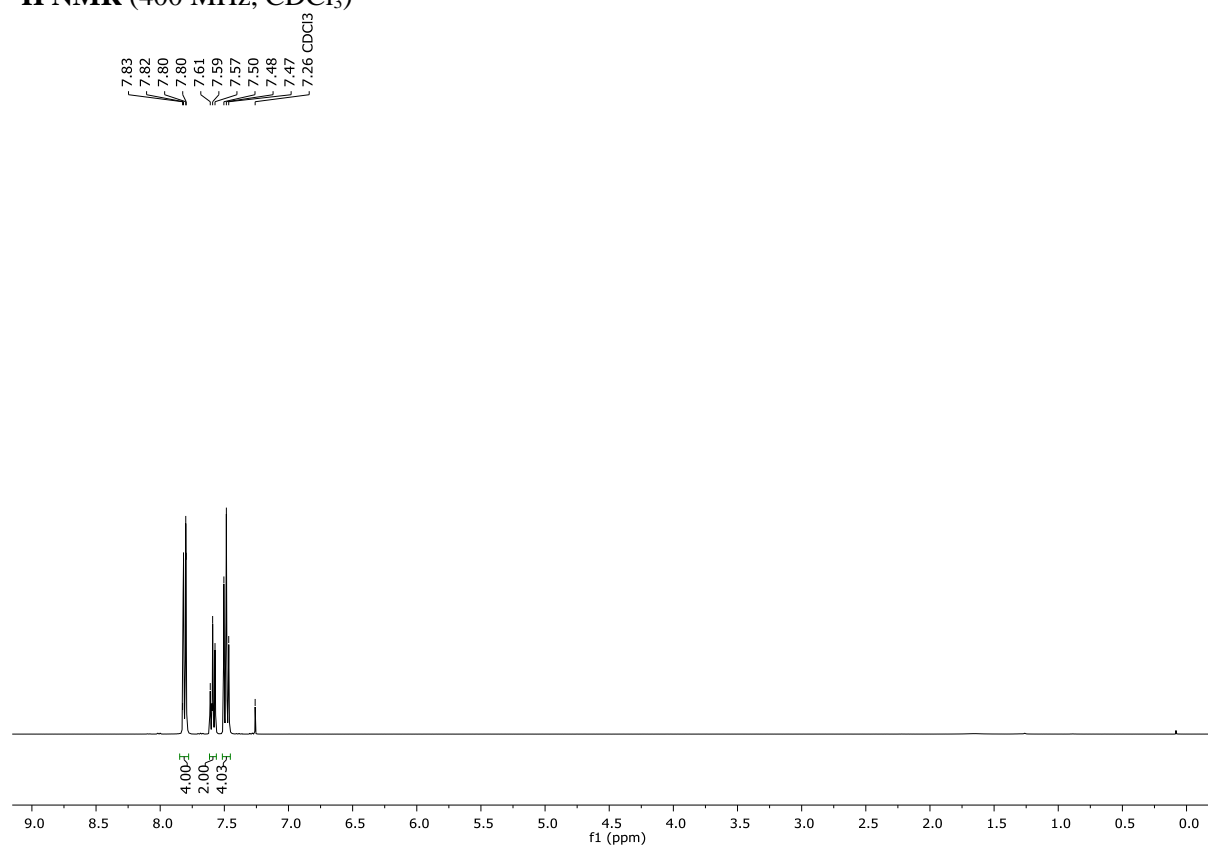

*Benzamide*

$^1\text{H}$  NMR (400 MHz,  $\text{CDCl}_3$ )

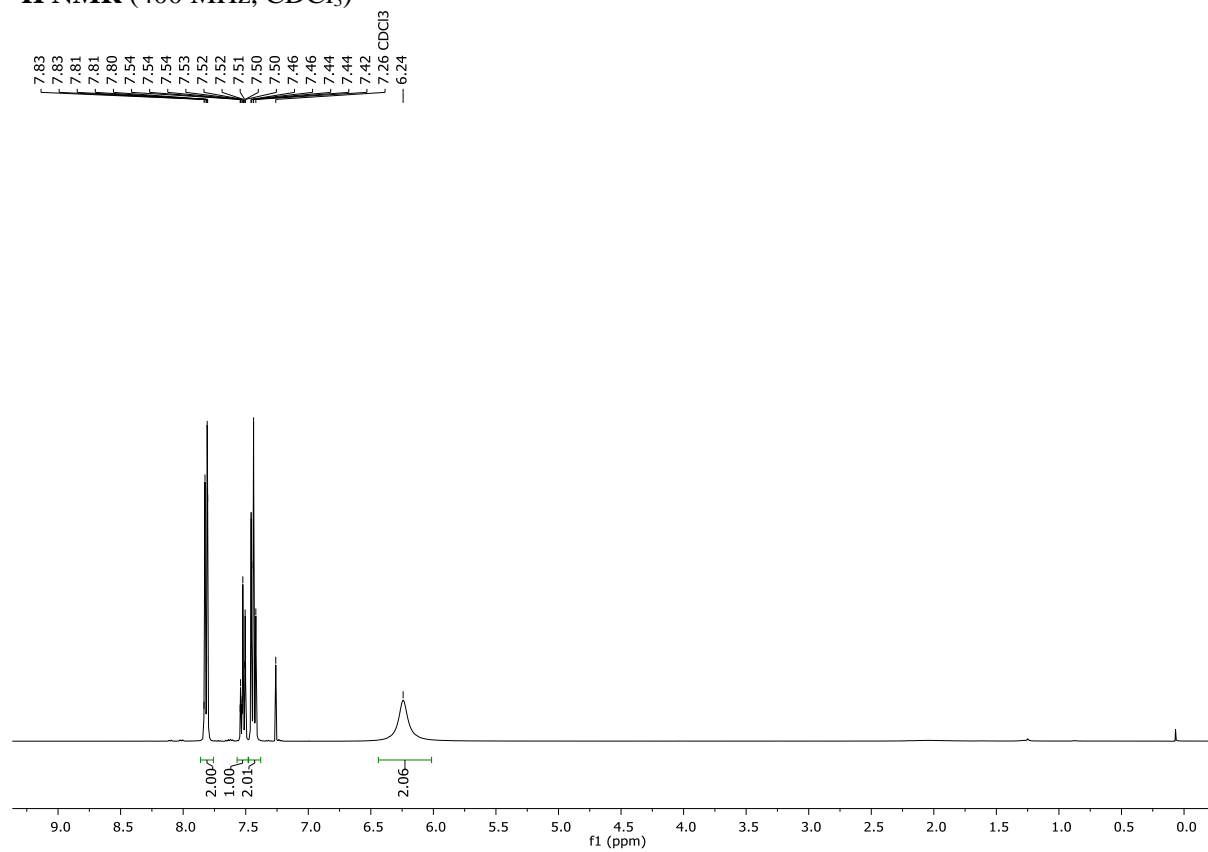

*Benzamide*

$^1\text{H}$  NMR (400 MHz,  $\text{DMSO-}d_6$ )

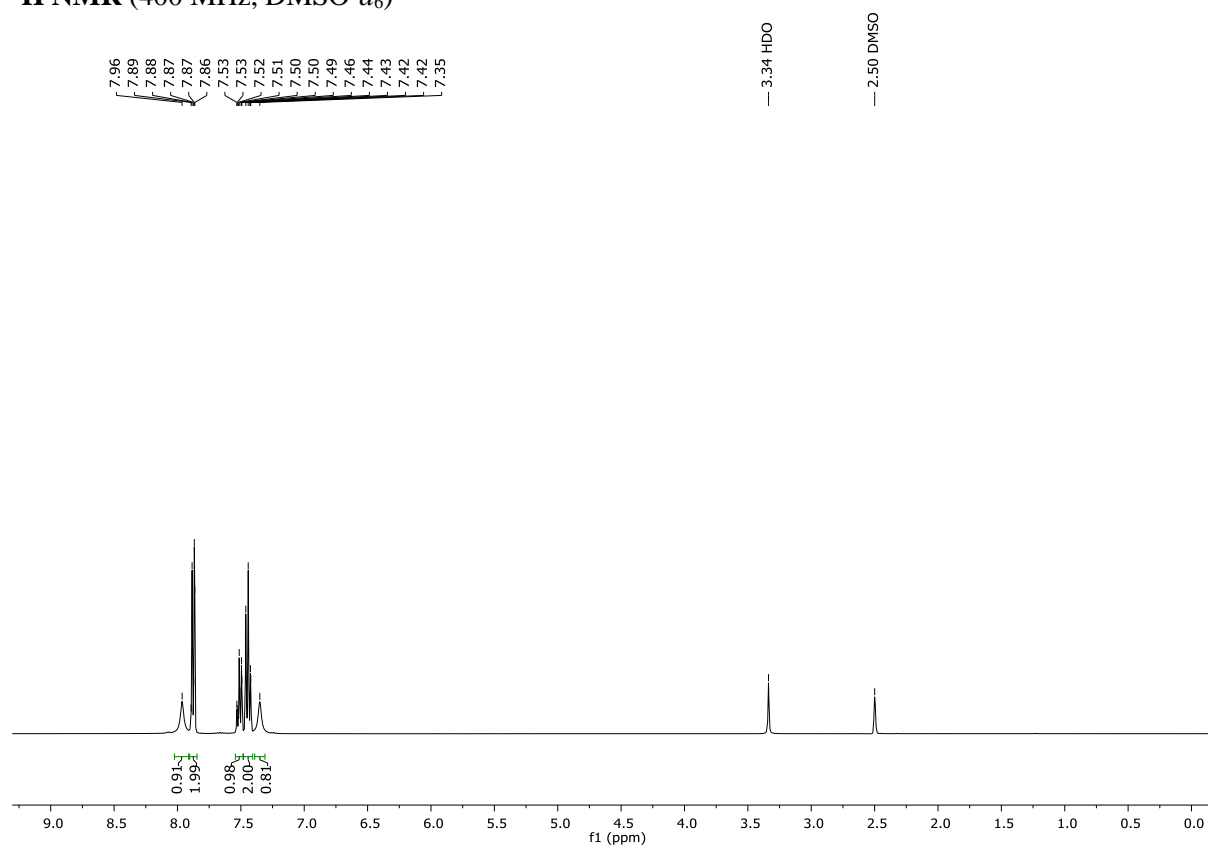

*N,N*-Dimethylbenzamide

$^1\text{H}$  NMR (400 MHz,  $\text{CDCl}_3$ )

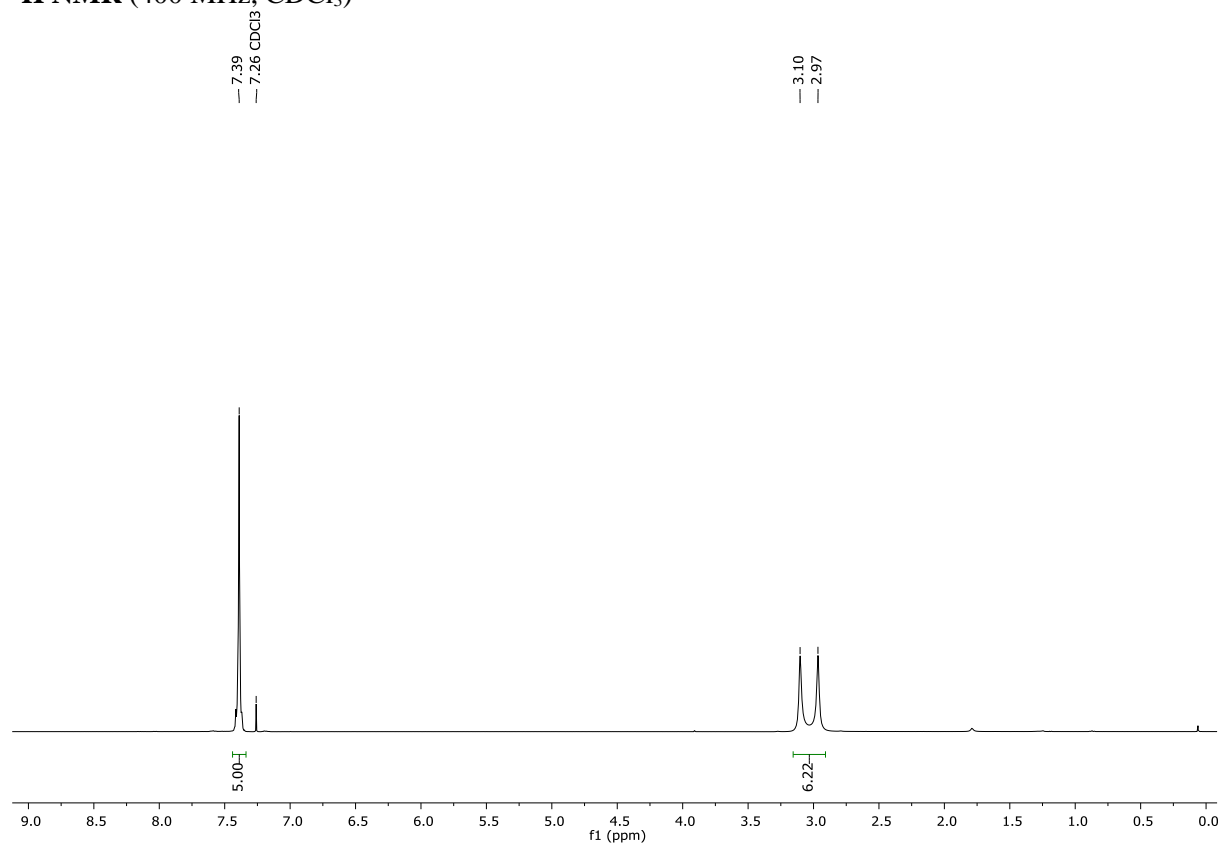

*Ethyl benzoate*

<sup>1</sup>H NMR (400 MHz, CDCl<sub>3</sub>)

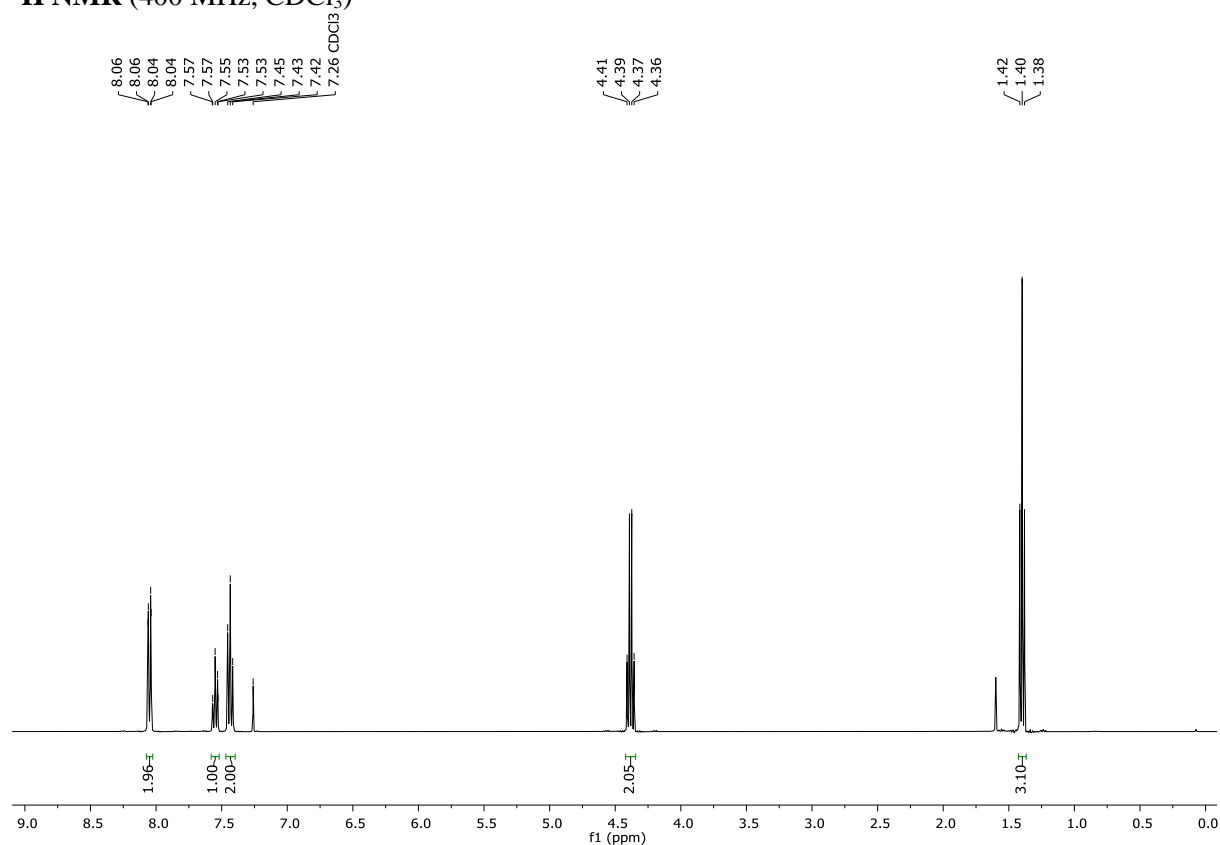

*Nitrobenzene*

<sup>1</sup>H NMR (400 MHz, CDCl<sub>3</sub>)

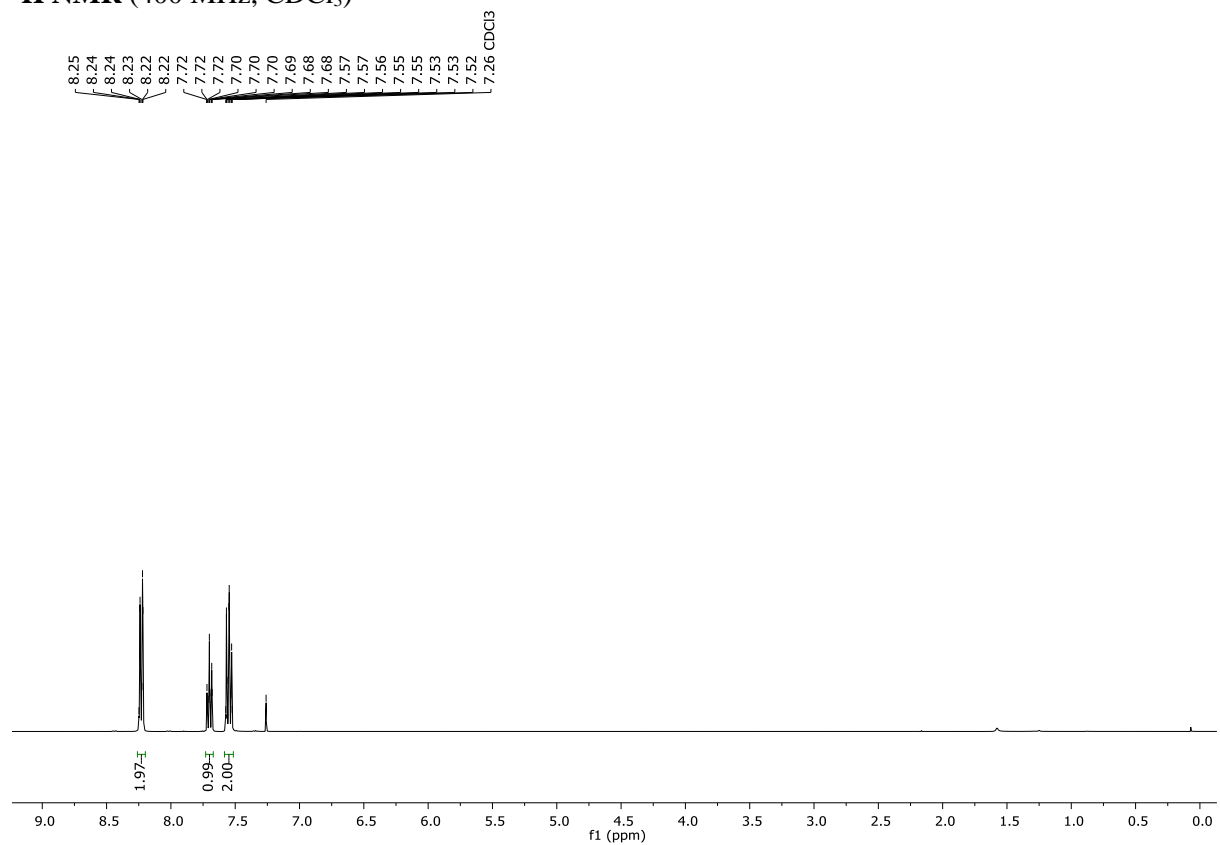

*Nitrobenzene*

$^1\text{H}$  NMR (400 MHz,  $\text{DMSO}-d_6$ )

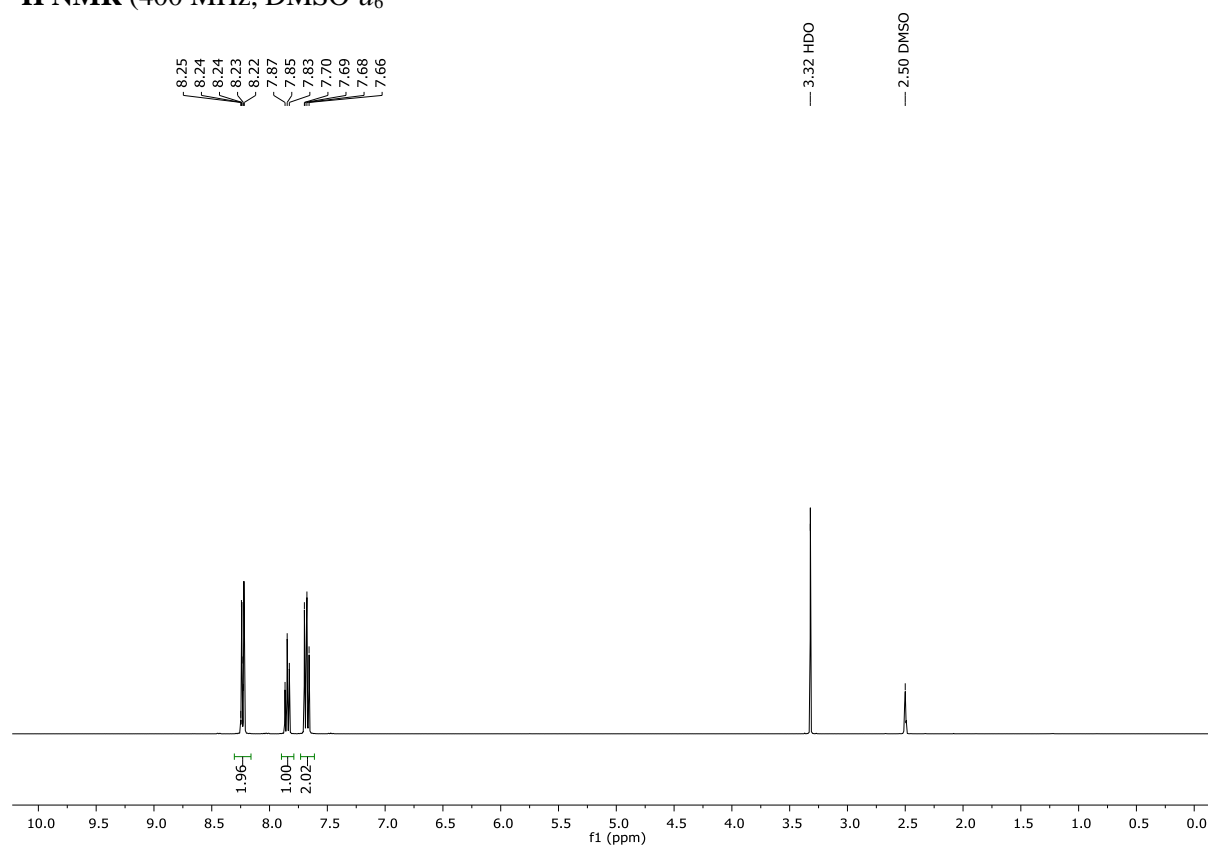

*Benzenesulfonamide*

$^1\text{H}$  NMR (400 MHz,  $\text{DMSO}-d_6$ )

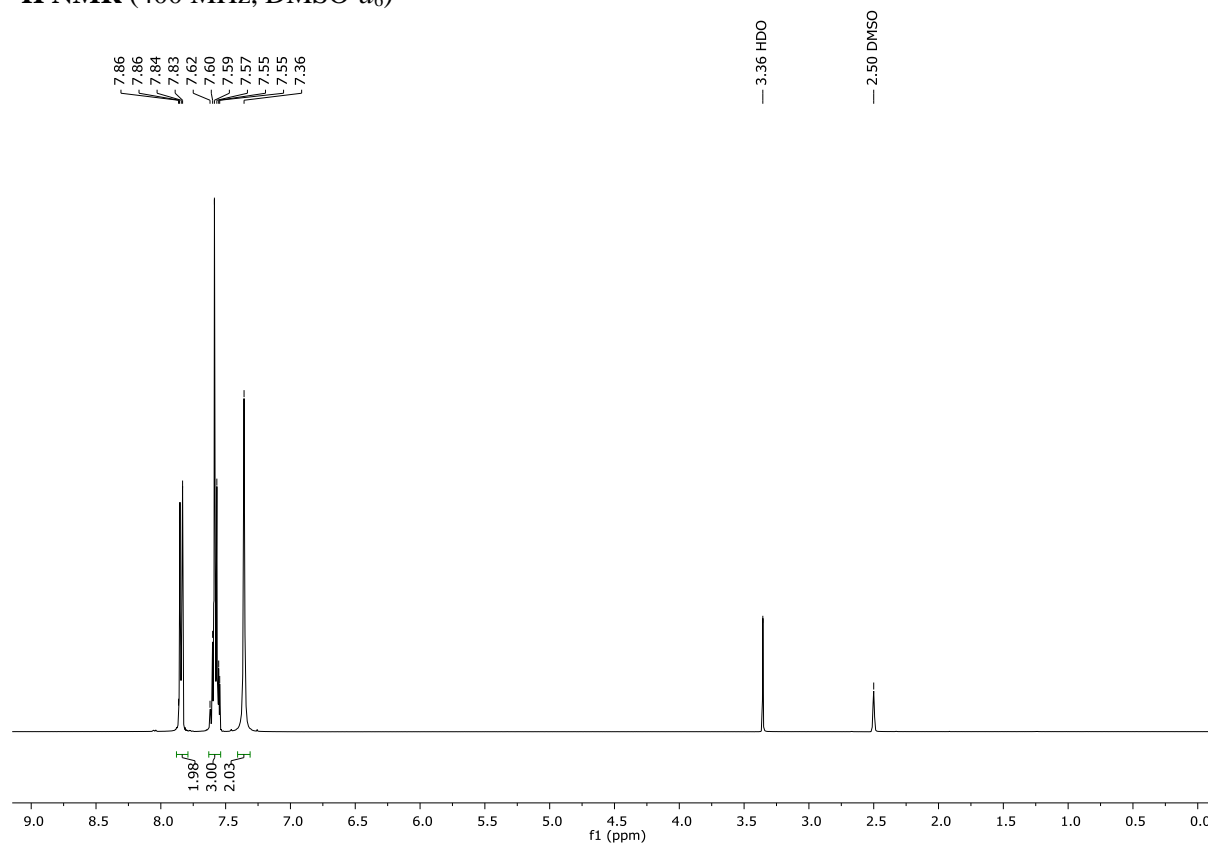



*(Methylsulfonyl)benzene*  
<sup>1</sup>H NMR (400 MHz, DMSO-*d*<sub>6</sub>)

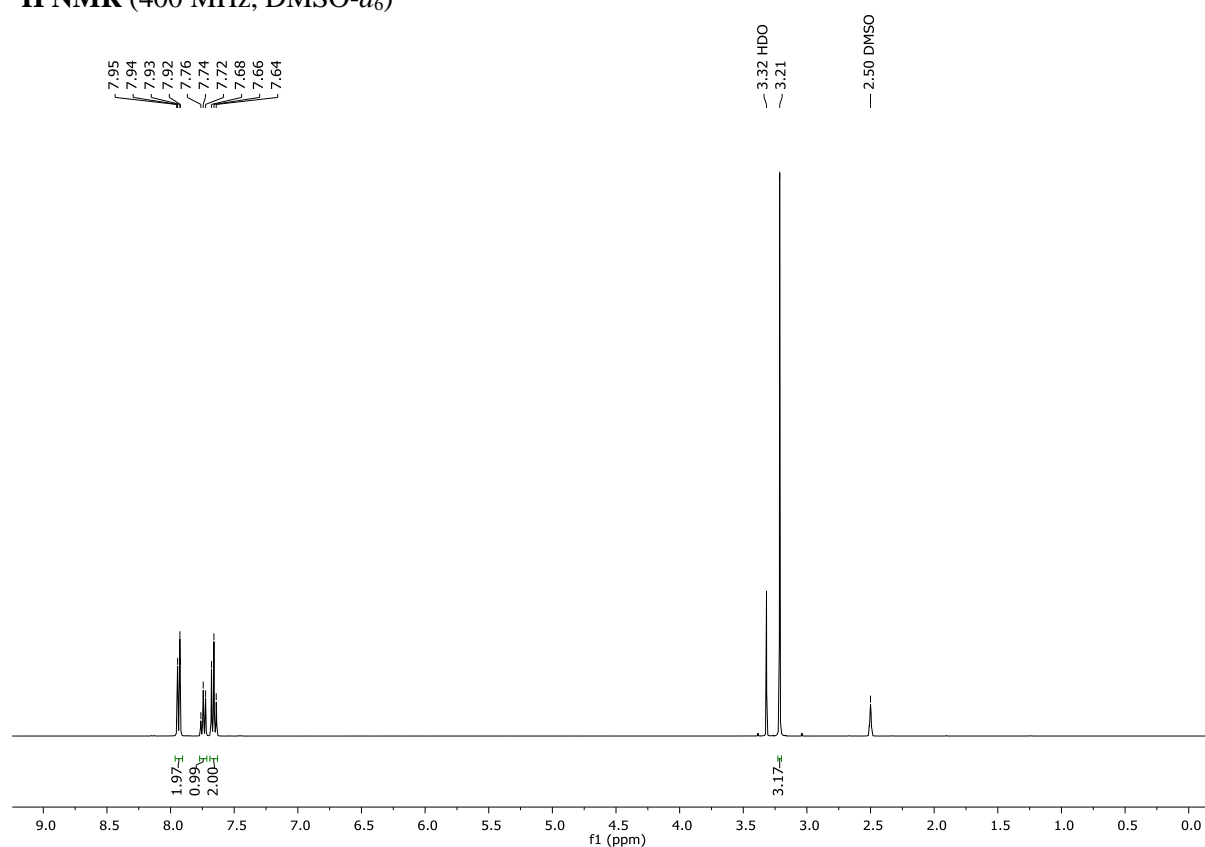

*Acetanilide*  
<sup>1</sup>H NMR (400 MHz, DMSO-*d*<sub>6</sub>)

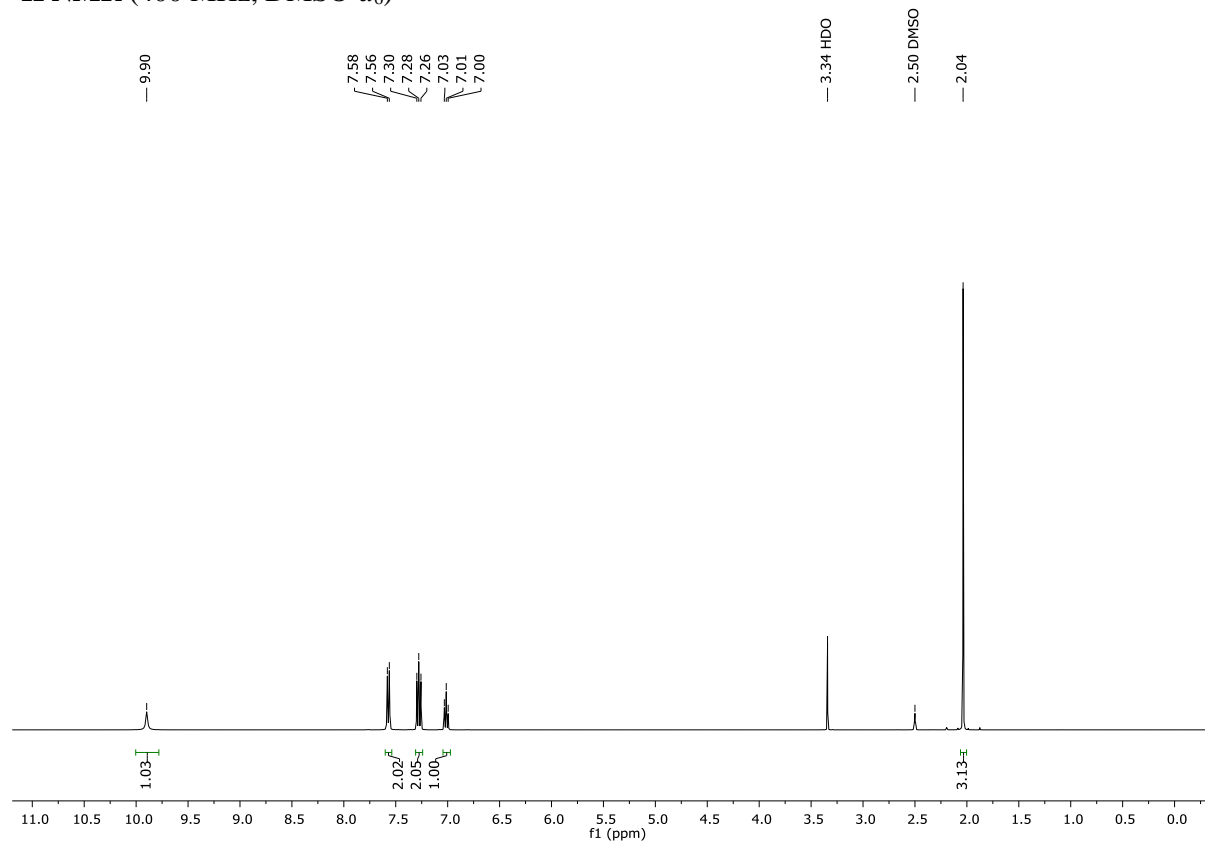

# 2-Phenylpyridine

<sup>1</sup>H NMR (400 MHz, CDCl<sub>3</sub>)

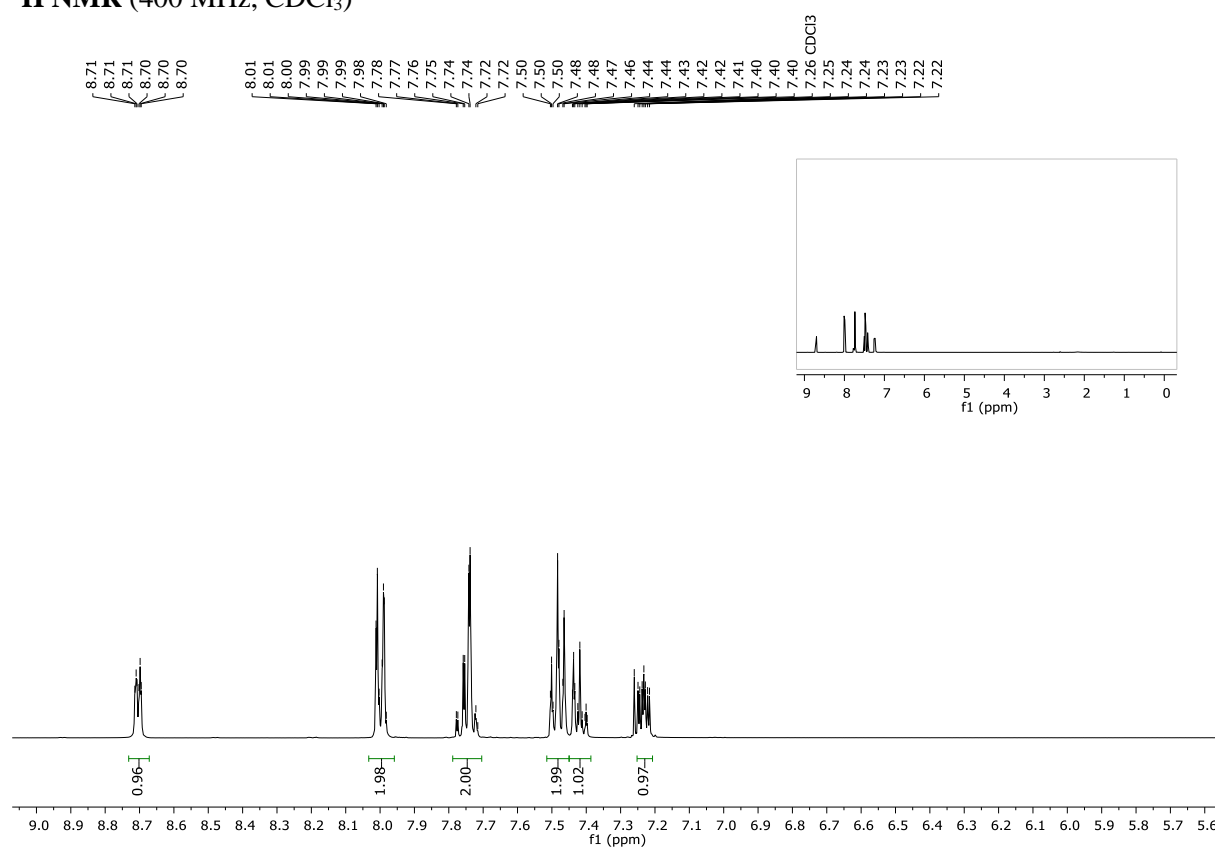

# 2-Phenylpyridine

<sup>1</sup>H NMR (400 MHz, DMSO-*d*<sub>6</sub>)

D332376

Person kpb19112

Ph-Py

@proton DMSO {C:\NMRdata} DJN 35

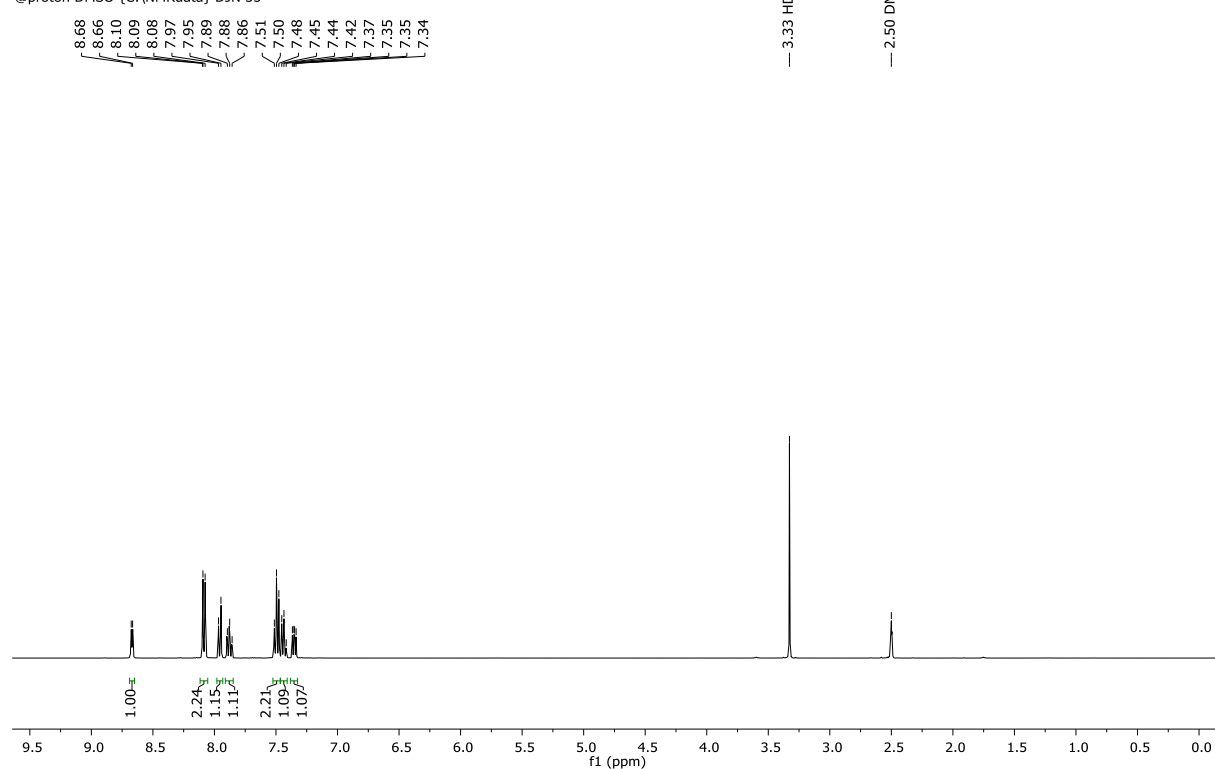

*1-Phenylpyrazole*

<sup>1</sup>H NMR (400 MHz, CDCl<sub>3</sub>)

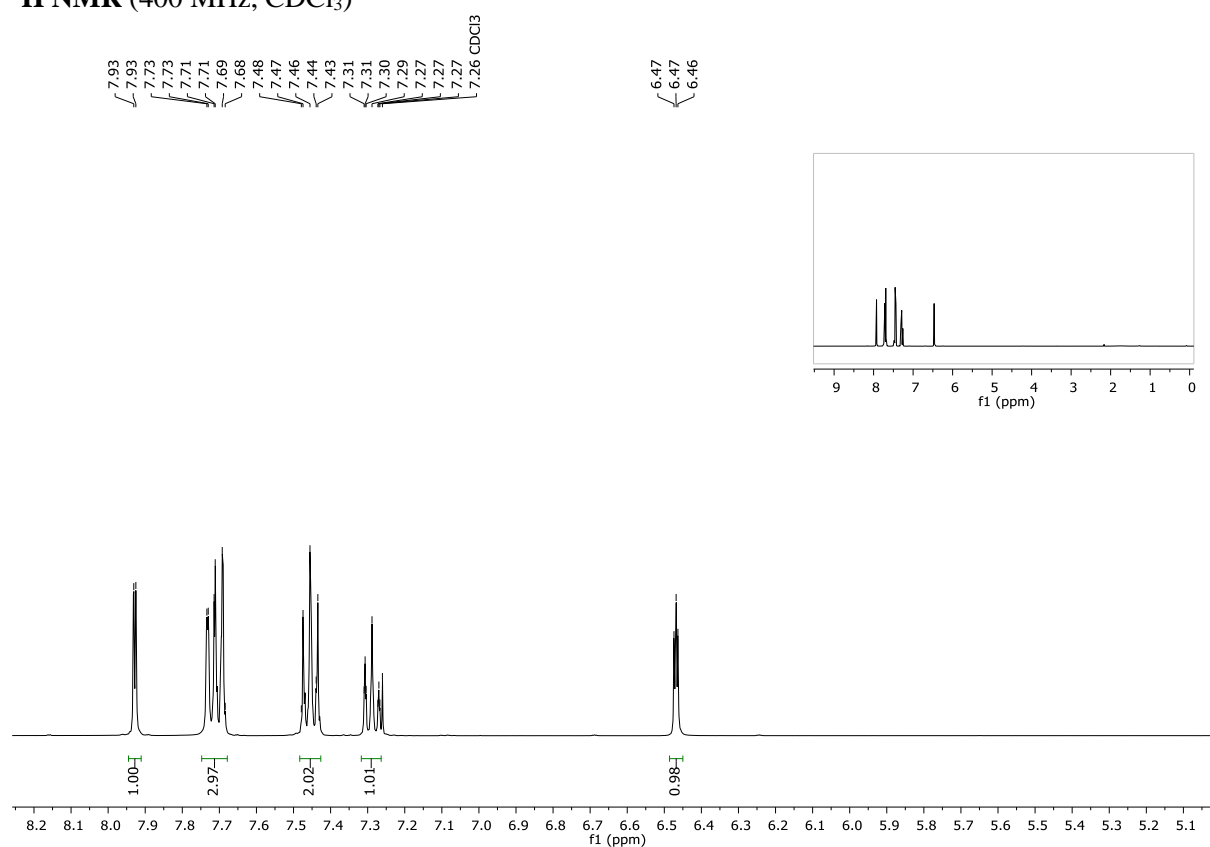

*2-Phenyloxazoline*

<sup>1</sup>H NMR (400 MHz, CDCl<sub>3</sub>)

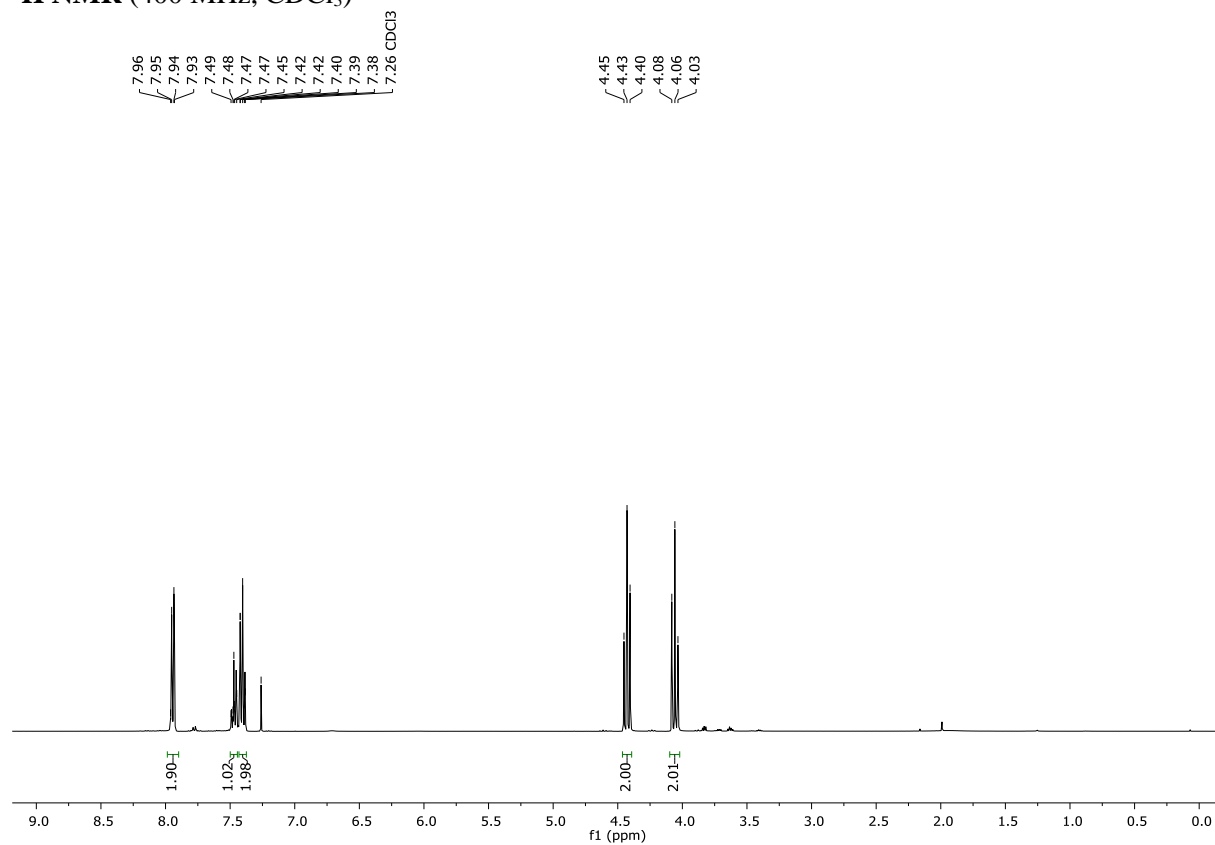

# 2-Phenylbenzothiazole

<sup>1</sup>H NMR (400 MHz, CDCl<sub>3</sub>)

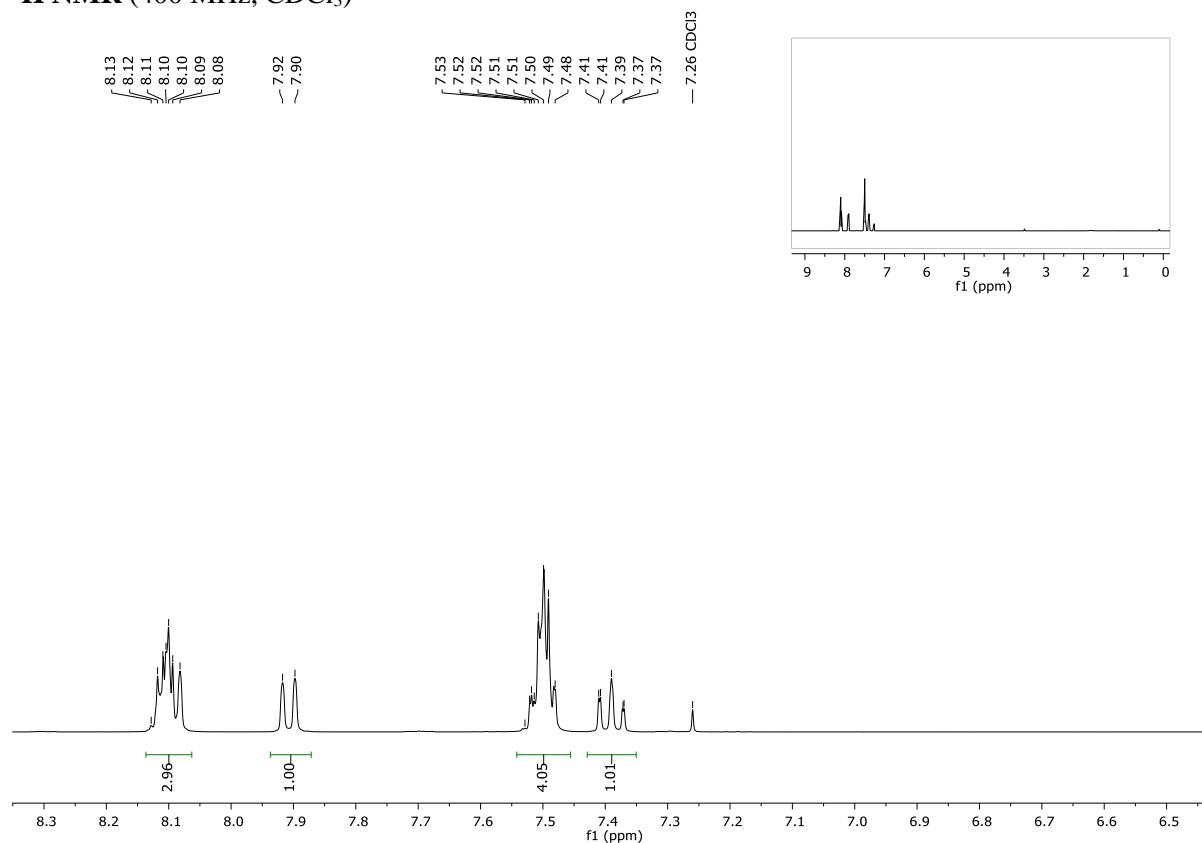

# 2-Phenylimidazole

<sup>1</sup>H NMR (400 MHz, DMSO-*d*<sub>6</sub>)

D331485.1.fid  
Person kpb19112  
Ph-imidazole  
@proton DMSO {C:\NMRdata} DJN 111

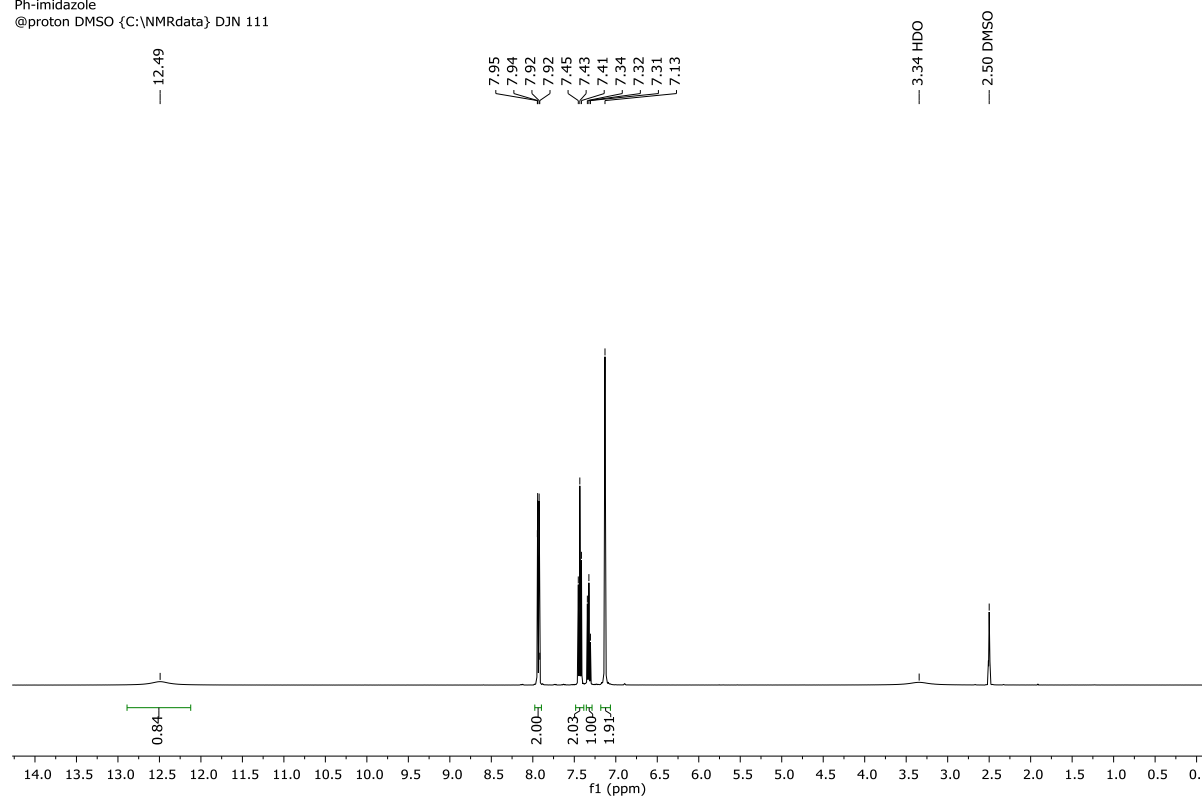

*2-Phenylimidazoline*

<sup>1</sup>H NMR (400 MHz, DMSO-*d*<sub>6</sub>)

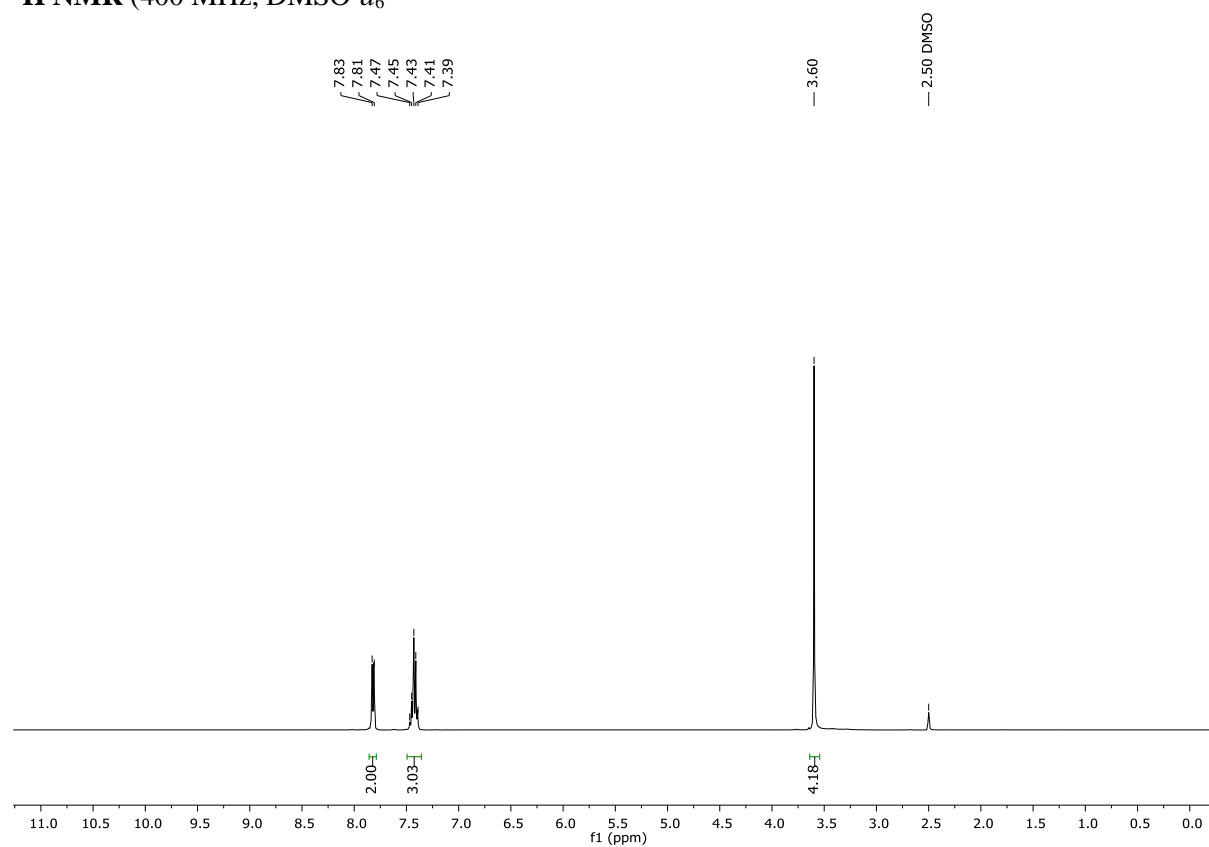

Supplement: d0cy01597k1.pdf [file d0cy01597k1.pdf]
